# Supplementary material for: Intrarenal microRNA signature related to the fibrosis process in chronic kidney disease: identification and functional validation of key miRNAs
Source: BMC Nephrol. 2019 Aug 27;20:336. doi: 10.1186/s12882-019-1512-x (PMC6712721; doi:10.1186/s12882-019-1512-x)
Supplement: Supplementary file 6 — Results for GO annotation and KEGG pathway enrichment analysis for predicted target genes of miR-3607-3p. (XLSX 215 kb) [file 12882_2019_1512_MOESM6_ESM.xlsx]

## Sheet: GO_BP
#Column "GO.ID" stands for the ID of gene ontology term
#Column "Term" stands for the name of gene ontology term
#Column "Ontology" stands for the ontology of GOID belongs to
#Column "Count" stands for the number of DE genes associated with the listed GOID
#Column "Pop.Hits" stands for the number of background population genes associated with the listed GOID
#Column "List.Total" stands for the total number of DE genes
#Column "Pop.Total" stands for the total number of background population genes
#Column "Fold.Enrichment" stands for the Fold Enrichment value of the GOID, it equals (Count/Pop.Hits)/(List.Total/Pop.Total)
#Column "Pvalue" stands for the significance testing value of the GOID
#Column "FDR" stands for the false discovery rate of the GOID, using Benjamini & Hochberg (1995) method
#Column "Enrichment.Score" stands for the Enrichment Score value of the GOID, it equals (-log10(Pvalue))
#Column "GENES" stands for the DE genes associated with the GOID
GO.ID	Term	Ontology	Count	Pop.Hits	List.Total	Pop.Total	Fold.Enrichment	Pvalue	FDR	Enrichment.Score	GENES
GO:0050794	regulation of cellular process	Biological process	379	7509	583	14742	1.27628	1.84556e-12	7.86578e-09	11.7339	MRE11A//ORC4//PSMB2//PSMD9//UBE2D1//CDC7//DBF4//FOXN3//CCNT2//E2F4//NPAT//CUX1//DNMT3A//FOXO3//NR6A1//GLI2//MECP2//NFX1//NOTCH1//RNF2//TBL1X//NR2F2//ZNF148//NRIP1//NCOR1//NCOR2//HEXIM1//ZMYND11//ZHX1//KLF12//KDM6B//RCOR1//SIRT1//ZMYND8//NIPBL//BCOR//MOSPD1//GZF1//LCOR//JDP2//OSR1//MAP3K1//NF1//TAOK3//GNAI2//MAP3K2//NOD2//TAB3//TRA2B//CELF3//TAP2//SNCA//VAMP3//EDNRA//ITGB3//CLIP3//PELI2//BMPR2//CD…
GO:0009987	cellular process	Biological process	548	12597	583	14742	1.10002	3.18007e-11	6.77672e-08	10.4976	ERO1L//SIRT1//MRE11A//ATG5//ORC4//TOP1//CDC7//DBF4//KAT7//RRM2B//REV1//PSMB2//PSMD9//UBE2D1//FOXN3//CCNT2//E2F4//EIF4E//PPP3CA//CUL5//CUL3//PIM2//NPAT//KIAA2022//PAFAH1B1//YWHAG//LATS1//ACTR1A//AHCY//CUX1//DNMT3A//FOXO3//NR6A1//GLI2//MECP2//NFX1//NOTCH1//RNF2//TBL1X//NR2F2//ZNF148//NRIP1//NCOR1//NCOR2//HEXIM1//ZMYND11//ZHX1//KLF12//KDM6B//RCOR1//ZMYND8//NIPBL//BCOR//MOSPD1//GZF1//LCOR//JDP2//OSR1…
GO:0065007	biological regulation	Biological process	405	8387	583	14742	1.22106	1.32312e-10	1.87972e-07	9.8784	MRE11A//ORC4//PSMB2//PSMD9//UBE2D1//CDC7//DBF4//FOXN3//CCNT2//E2F4//NPAT//CUX1//DNMT3A//FOXO3//NR6A1//GLI2//MECP2//NFX1//NOTCH1//RNF2//TBL1X//NR2F2//ZNF148//NRIP1//NCOR1//NCOR2//HEXIM1//ZMYND11//ZHX1//KLF12//KDM6B//RCOR1//SIRT1//ZMYND8//NIPBL//BCOR//MOSPD1//GZF1//LCOR//JDP2//OSR1//MAP3K1//NF1//TAOK3//GNAI2//MAP3K2//NOD2//TAB3//TRA2B//CELF3//GLUL//SLC38A1//PPARGC1A//EPHA3//GDNF//HOXA11//ADRA2A//ER…
GO:0031323	regulation of cellular metabolic process	Biological process	236	4287	583	14742	1.39202	1.24285e-09	1.32426e-06	8.90558	MRE11A//CCNT2//E2F4//NPAT//CUX1//DNMT3A//FOXO3//NR6A1//GLI2//MECP2//NFX1//NOTCH1//RNF2//TBL1X//NR2F2//ZNF148//NRIP1//NCOR1//NCOR2//HEXIM1//ZMYND11//ZHX1//KLF12//KDM6B//RCOR1//SIRT1//ZMYND8//NIPBL//BCOR//MOSPD1//GZF1//LCOR//JDP2//OSR1//GNAI2//MAP3K1//MAP3K2//NOD2//TAB3//TRA2B//CELF3//SNCA//VAMP3//EDNRA//ITGB3//CLIP3//PELI2//MAGI2//ADRA2A//EREG//ERRFI1//SNX6//NR3C1//ESCO1//UBE2V2//SIRT5//ARID1A//ZF…
GO:0050789	regulation of biological process	Biological process	382	7933	583	14742	1.21763	3.25746e-09	2.77666e-06	8.48712	MRE11A//ORC4//PSMB2//PSMD9//UBE2D1//CDC7//DBF4//FOXN3//CCNT2//E2F4//NPAT//CUX1//DNMT3A//FOXO3//NR6A1//GLI2//MECP2//NFX1//NOTCH1//RNF2//TBL1X//NR2F2//ZNF148//NRIP1//NCOR1//NCOR2//HEXIM1//ZMYND11//ZHX1//KLF12//KDM6B//RCOR1//SIRT1//ZMYND8//NIPBL//BCOR//MOSPD1//GZF1//LCOR//JDP2//OSR1//MAP3K1//NF1//TAOK3//GNAI2//MAP3K2//NOD2//TAB3//TRA2B//CELF3//GDNF//HOXA11//ADRA2A//EREG//PELI1//FAM109A//TAP2//SNCA//…
GO:0032502	developmental process	Biological process	224	4104	583	14742	1.38016	1.06328e-08	6.56114e-06	7.97335	SS18//STK4//CUL3//MYH9//CDH11//DLX5//GLI2//HOXA11//JAG2//PITX1//PRELP//WDR5//CHD7//EPHB2//EREG//FGF9//VAV3//SIRT1//C1GALT1//OVOL2//NAA15//ARHGAP24//FOXO3//NRIP1//PDE3A//CRKL//FOXO1//EDNRA//NFATC3//NRP1//ZFP36L1//QKI//NF1//HIPK1//PBX1//OSR1//GDNF//NIPBL//RDH10//GZF1//PAFAH1B1//GNA12//NOTCH1//WNT7B//FLVCR1//RNF2//BMPR2//MCL1//FZD3//ZEB2//PLXNA2//CTNND2//CELSR3//MARK1//NR2F2//NAV1//MDGA1//WFS1//RRM2…
GO:0080090	regulation of primary metabolic process	Biological process	228	4197	583	14742	1.37367	1.07762e-08	6.56114e-06	7.96754	MRE11A//CCNT2//E2F4//NPAT//CUX1//DNMT3A//FOXO3//NR6A1//GLI2//MECP2//NFX1//NOTCH1//RNF2//TBL1X//NR2F2//ZNF148//NRIP1//NCOR1//NCOR2//HEXIM1//ZMYND11//ZHX1//KLF12//KDM6B//RCOR1//SIRT1//ZMYND8//NIPBL//BCOR//MOSPD1//GZF1//LCOR//JDP2//OSR1//GNAI2//MAP3K1//MAP3K2//NOD2//TAB3//TRA2B//CELF3//EDNRA//ITGB3//CLIP3//PELI2//ADRA2A//EREG//ERRFI1//SNX6//NR3C1//ESCO1//UBE2V2//SIRT5//ARID1A//ZFP36L1//CBL//CTNND2//…
GO:0023052	signaling	Biological process	235	4383	583	14742	1.35576	1.79166e-08	9.54506e-06	7.74674	MAP3K1//NF1//TAOK3//MAP3K2//NOD2//TAB3//GLUL//SLC38A1//GDNF//HOXA11//SNCA//VAMP3//GNAI2//MAP2K4//PELI2//PELI1//NOTCH1//MAGI2//MARK1//TCF7//WNT7B//CUL3//TNKS//SOSTDC1//CSNK1G1//FAM123B//ABL2//ADCY3//ADRA2A//ADRBK2//ANK3//CTNND2//DGKG//DPYSL2//EDA//EDNRA//STX2//FGF9//FLT3LG//GAS6//GMFB//GNA12//GNL1//GRIA2//NR3C1//IGF2R//NR3C2//PPP1R12A//PDE3A//PDE4D//PDE7A//PIK3R1//PIK3R2//PPP2R5E//PRKCB//RAP2B//SO…
GO:0060255	regulation of macromolecule metabolic process	Biological process	217	3998	583	14742	1.37248	3.58731e-08	1.66014e-05	7.44523	MRE11A//CCNT2//E2F4//NPAT//CUX1//DNMT3A//FOXO3//NR6A1//GLI2//MECP2//NFX1//NOTCH1//RNF2//TBL1X//NR2F2//ZNF148//NRIP1//NCOR1//NCOR2//HEXIM1//ZMYND11//ZHX1//KLF12//KDM6B//RCOR1//SIRT1//ZMYND8//NIPBL//BCOR//MOSPD1//GZF1//LCOR//JDP2//OSR1//GNAI2//MAP3K1//MAP3K2//NOD2//TAB3//TRA2B//CELF3//SNCA//VAMP3//EDNRA//ITGB3//CLIP3//PELI2//MAGI2//ADRA2A//EREG//ERRFI1//SNX6//ESCO1//UBE2V2//MGMT//SIRT5//NR3C1//ARID…
GO:0007154	cell communication	Biological process	238	4490	583	14742	1.34035	3.89521e-08	1.66014e-05	7.40947	ATG5//MAP3K1//NF1//TAOK3//MAP3K2//NOD2//TAB3//GLUL//SLC38A1//GDNF//HOXA11//SNCA//GNAI2//MAP2K4//PELI2//PELI1//NOTCH1//MAGI2//MARK1//TCF7//WNT7B//CUL3//TNKS//SOSTDC1//CSNK1G1//FAM123B//ABL2//ADCY3//ADRA2A//ADRBK2//ANK3//CTNND2//DGKG//DPYSL2//EDA//EDNRA//STX2//FGF9//FLT3LG//GAS6//GMFB//GNA12//GNL1//GRIA2//NR3C1//IGF2R//NR3C2//PPP1R12A//PDE3A//PDE4D//PDE7A//PIK3R1//PIK3R2//PPP2R5E//PRKCB//RAP2B//SOS…
GO:0019219	regulation of nucleobase-containing compound metabolic process	Biological process	186	3325	583	14742	1.41452	7.29025e-08	2.60274e-05	7.13726	MRE11A//E2F4//NPAT//CUX1//DNMT3A//FOXO3//NR6A1//GLI2//MECP2//NFX1//NOTCH1//RNF2//TBL1X//NR2F2//ZNF148//NRIP1//NCOR1//NCOR2//HEXIM1//ZMYND11//ZHX1//KLF12//KDM6B//RCOR1//SIRT1//ZMYND8//NIPBL//BCOR//MOSPD1//GZF1//LCOR//JDP2//OSR1//TRA2B//CELF3//ESCO1//UBE2V2//SIRT5//NR3C1//ARID1A//ZFP36L1//CBL//CCNT2//CTNND2//EGR3//ELAVL2//FOXA1//FOXK2//AFF3//MLL//NR3C2//MNT//MYBL2//MYCL1//PBX1//PLAG1//PLAGL2//POU2F…
GO:0048869	cellular developmental process	Biological process	151	2554	583	14742	1.49501	7.32821e-08	2.60274e-05	7.135	SS18//STK4//CUL3//MYH9//EREG//FOXO3//PDE3A//ZFP36L1//QKI//DLX5//FGF9//GLI2//NF1//PAFAH1B1//NOTCH1//MCL1//GDNF//ZEB2//OVOL2//HOXA11//CELSR3//MARK1//NR2F2//NAV1//MDGA1//FOXF2//OSR1//E2F4//ONECUT2//NCOR1//NKX2-2//BCL11B//DCC//MAP1B//WNT7B//ULK2//RTN4R//ABL2//COL4A3//DPYSL2//EPHB2//ITGB3//NEO1//PLXNA2//SCN1B//SDCBP//SLIT1//SOS1//EZR//ST8SIA4//UNC5C//NRP1//RANBP9//PLXNC1//SRGAP1//UNC5D//ADAM12//CACNA2…
GO:0019222	regulation of metabolic process	Biological process	246	4717	583	14742	1.31873	8.51119e-08	2.79036e-05	7.07001	MRE11A//CCNT2//E2F4//NPAT//CUX1//DNMT3A//FOXO3//NR6A1//GLI2//MECP2//NFX1//NOTCH1//RNF2//TBL1X//NR2F2//ZNF148//NRIP1//NCOR1//NCOR2//HEXIM1//ZMYND11//ZHX1//KLF12//KDM6B//RCOR1//SIRT1//ZMYND8//NIPBL//BCOR//MOSPD1//GZF1//LCOR//JDP2//OSR1//GNAI2//MAP3K1//MAP3K2//NOD2//TAB3//TRA2B//CELF3//SNCA//VAMP3//EDNRA//ITGB3//CLIP3//PELI2//MAGI2//ADRA2A//EREG//ERRFI1//SNX6//NR3C1//ESCO1//UBE2V2//MGMT//SIRT5//ARID…
GO:0023051	regulation of signaling	Biological process	114	1789	583	14742	1.61132	1.11611e-07	3.39777e-05	6.95229	MAP3K2//NOD2//TAB3//FAM109A//SNCA//VAMP3//ADRA2A//EREG//ERRFI1//SNX6//RAB7A//WNT7B//PCSK1//CACNA2D2//AKAP5//RIC8B//GLI2//LANCL2//YWHAG//SPRY3//SPRED3//HOMER1//LDLRAP1//SCAI//PJA2//HIPK1//BMPR2//GDF6//DPYSL2//NR3C1//NCOR1//CBL//NEDD4//NF1//ZEB2//FGF9//ONECUT2//PEG10//SIRT1//NOTCH1//SOSTDC1//ITGB3//PRKCB//MYO5A//CDH2//ZCCHC11//DDIT4//IQSEC2//PSMD9//IRS2//SLC30A8//USP46//ASAP1//CHN1//EPHA3//PAFAH1B1…
GO:0007275	multicellular organismal development	Biological process	200	3675	583	14742	1.37613	1.50788e-07	4.28439e-05	6.82163	CDH11//DLX5//GLI2//HOXA11//JAG2//PITX1//PRELP//WDR5//CHD7//EPHB2//EREG//FGF9//MYH9//VAV3//SIRT1//C1GALT1//OVOL2//NAA15//ARHGAP24//FOXO3//NRIP1//CRKL//FOXO1//EDNRA//NFATC3//STK4//NRP1//ZFP36L1//QKI//HIPK1//PBX1//OSR1//GDNF//NF1//NIPBL//RDH10//GZF1//GNA12//NOTCH1//WNT7B//CUL3//FLVCR1//RNF2//BMPR2//ZEB2//PLXNA2//CELSR3//MARK1//PAFAH1B1//NR2F2//NAV1//MDGA1//WFS1//RRM2B//AQP11//FOXF2//FZD3//ONECUT2//A…
GO:0051171	regulation of nitrogen compound metabolic process	Biological process	188	3406	583	14742	1.39573	1.62752e-07	4.3353e-05	6.78847	MRE11A//E2F4//NPAT//CUX1//DNMT3A//FOXO3//NR6A1//GLI2//MECP2//NFX1//NOTCH1//RNF2//TBL1X//NR2F2//ZNF148//NRIP1//NCOR1//NCOR2//HEXIM1//ZMYND11//ZHX1//KLF12//KDM6B//RCOR1//SIRT1//ZMYND8//NIPBL//BCOR//MOSPD1//GZF1//LCOR//JDP2//OSR1//TRA2B//CELF3//ESCO1//UBE2V2//SIRT5//NR3C1//ARID1A//ZFP36L1//CBL//CCNT2//CTNND2//EGR3//ELAVL2//FOXA1//FOXK2//AFF3//MLL//NR3C2//MNT//MYBL2//MYCL1//PBX1//PLAG1//PLAGL2//POU2F…
GO:0009653	anatomical structure morphogenesis	Biological process	116	1847	583	14742	1.5881	1.82177e-07	4.56729e-05	6.73951	SS18//STK4//CUL3//MYH9//EPHB2//EREG//FGF9//VAV3//SIRT1//C1GALT1//OVOL2//NAA15//ARHGAP24//EDNRA//NFATC3//NRP1//ZFP36L1//QKI//GDNF//HOXA11//PBX1//GZF1//PAFAH1B1//RNF2//BMPR2//FZD3//PLXNA2//ZEB2//CTNND2//FOXF2//BBS5//DLX5//GLI2//CDH13//NOTCH1//EGR3//NIPBL//CHD7//NPY1R//WNT7B//BCL11B//MAGI2//CRKL//E2F4//STX2//FHL1//ONECUT2//RDH10//DCC//MAP1B//ULK2//RTN4R//ABL2//COL4A3//DPYSL2//ITGB3//NEO1//SCN1B//SDC…
GO:0048523	negative regulation of cellular process	Biological process	151	2594	583	14742	1.47196	1.9892e-07	4.70999e-05	6.70132	MRE11A//ORC4//PSMB2//PSMD9//UBE2D1//CDC7//DBF4//FOXN3//CUX1//DNMT3A//FOXO3//NR6A1//GLI2//MECP2//NFX1//NOTCH1//RNF2//TBL1X//NR2F2//ZNF148//NRIP1//NCOR1//NCOR2//HEXIM1//ZMYND11//ZHX1//KLF12//KDM6B//RCOR1//SIRT1//ZMYND8//NIPBL//BCOR//MOSPD1//GZF1//LCOR//JDP2//OSR1//NF1//IRS2//TWF1//ERRFI1//SNX6//SIRT5//FOXO1//GDNF//NR3C1//NRG1//MCL1//SNCA//PIM2//AVEN//WNK3//MAP1B//MID1//EIF4G2//CUL5//CUL3//CHFR//CDH…
GO:0048856	anatomical structure development	Biological process	191	3510	583	14742	1.37599	3.52506e-07	7.64131e-05	6.45283	SS18//STK4//CUL3//MYH9//CDH11//DLX5//GLI2//HOXA11//JAG2//PITX1//PRELP//WDR5//CHD7//EPHB2//EREG//FGF9//VAV3//SIRT1//C1GALT1//OVOL2//NAA15//ARHGAP24//FOXO3//NRIP1//PDE3A//CRKL//FOXO1//EDNRA//NFATC3//NRP1//ZFP36L1//QKI//HIPK1//PBX1//OSR1//GDNF//NF1//NIPBL//RDH10//GZF1//PAFAH1B1//RNF2//BMPR2//FZD3//ZEB2//PLXNA2//CTNND2//CELSR3//MARK1//NR2F2//NAV1//MDGA1//WFS1//RRM2B//AQP11//FOXF2//NOTCH1//ONECUT2//AT…
GO:2000112	regulation of cellular macromolecule biosynthetic process	Biological process	170	3039	583	14742	1.41451	3.68414e-07	7.64131e-05	6.43366	E2F4//NPAT//CUX1//DNMT3A//FOXO3//NR6A1//GLI2//MECP2//NFX1//NOTCH1//RNF2//TBL1X//NR2F2//ZNF148//NRIP1//NCOR1//NCOR2//HEXIM1//ZMYND11//ZHX1//KLF12//KDM6B//RCOR1//SIRT1//ZMYND8//NIPBL//BCOR//MOSPD1//GZF1//LCOR//JDP2//OSR1//ESCO1//SIRT5//NR3C1//ARID1A//ZFP36L1//CBL//CCNT2//CTNND2//EGR3//ELAVL2//FOXA1//FOXK2//AFF3//MLL//NR3C2//MNT//MYBL2//MYCL1//PBX1//PLAG1//PLAGL2//POU2F1//ARID4A//SS18//TAF4B//TCF7//…
GO:0032501	multicellular organismal process	Biological process	263	5201	583	14742	1.27866	3.76507e-07	7.64131e-05	6.42423	CDH11//DLX5//GLI2//HOXA11//JAG2//PITX1//PRELP//WDR5//CHD7//MINPP1//GLUL//SLC38A1//EPHB2//EREG//FGF9//MYH9//VAV3//SIRT1//C1GALT1//OVOL2//NAA15//ARHGAP24//FOXO3//NRIP1//PDE3A//CRKL//FOXO1//EDNRA//NFATC3//STK4//NRP1//ZFP36L1//QKI//NF1//HIPK1//PBX1//OSR1//GDNF//NIPBL//RDH10//GZF1//PPARGC1A//EPHA3//PAFAH1B1//GNA12//NOTCH1//WNT7B//CUL3//FLVCR1//RNF2//BMPR2//ZEB2//PLXNA2//CTNND2//CELSR3//MARK1//NR2F2//N…
GO:0034645	cellular macromolecule biosynthetic process	Biological process	205	3839	583	14742	1.35028	4.19293e-07	7.83052e-05	6.37748	ORC4//TOP1//CDC7//DBF4//KAT7//SIRT1//RRM2B//REV1//E2F4//NPAT//CUX1//DNMT3A//FOXO3//NR6A1//GLI2//MECP2//NFX1//NOTCH1//RNF2//TBL1X//NR2F2//ZNF148//NRIP1//NCOR1//NCOR2//HEXIM1//ZMYND11//ZHX1//KLF12//KDM6B//RCOR1//ZMYND8//NIPBL//BCOR//MOSPD1//GZF1//LCOR//JDP2//OSR1//RRN3//BMPR2//CCNT2//CEBPD//NR3C1//MAF//MLL//MNT//NFATC3//NFATC4//ARID4A//TAF4B//TAF12//RNMT//COPS2//NFAT5//ZBTB7B//POU2F1//BAZ1A//ESCO1/…
GO:0030154	cell differentiation	Biological process	141	2408	583	14742	1.48064	4.22576e-07	7.83052e-05	6.37409	MYH9//EREG//FOXO3//PDE3A//ZFP36L1//QKI//DLX5//FGF9//GLI2//NF1//PAFAH1B1//NOTCH1//MCL1//GDNF//ZEB2//OVOL2//HOXA11//CELSR3//MARK1//NR2F2//NAV1//MDGA1//CUL3//FOXF2//OSR1//E2F4//ONECUT2//NCOR1//NKX2-2//BCL11B//DCC//MAP1B//WNT7B//ULK2//RTN4R//ABL2//COL4A3//DPYSL2//EPHB2//ITGB3//NEO1//PLXNA2//SCN1B//SDCBP//SLIT1//SOS1//EZR//ST8SIA4//UNC5C//NRP1//RANBP9//PLXNC1//SRGAP1//UNC5D//ADAM12//CACNA2D2//CHN1//JA…
GO:0031326	regulation of cellular biosynthetic process	Biological process	180	3279	583	14742	1.38809	5.18312e-07	9.20435e-05	6.28541	E2F4//NPAT//CUX1//DNMT3A//FOXO3//NR6A1//GLI2//MECP2//NFX1//NOTCH1//RNF2//TBL1X//NR2F2//ZNF148//NRIP1//NCOR1//NCOR2//HEXIM1//ZMYND11//ZHX1//KLF12//KDM6B//RCOR1//SIRT1//ZMYND8//NIPBL//BCOR//MOSPD1//GZF1//LCOR//JDP2//OSR1//NR3C1//ESCO1//SIRT5//ARID1A//ZFP36L1//CBL//CCNT2//CTNND2//EGR3//ELAVL2//FOXA1//FOXK2//AFF3//MLL//NR3C2//MNT//MYBL2//MYCL1//PBX1//PLAG1//PLAGL2//POU2F1//ARID4A//SS18//TAF4B//TCF7//…
GO:0009889	regulation of biosynthetic process	Biological process	181	3307	583	14742	1.38399	5.81452e-07	9.91259e-05	6.23549	E2F4//NPAT//CUX1//DNMT3A//FOXO3//NR6A1//GLI2//MECP2//NFX1//NOTCH1//RNF2//TBL1X//NR2F2//ZNF148//NRIP1//NCOR1//NCOR2//HEXIM1//ZMYND11//ZHX1//KLF12//KDM6B//RCOR1//SIRT1//ZMYND8//NIPBL//BCOR//MOSPD1//GZF1//LCOR//JDP2//OSR1//NR3C1//ESCO1//SIRT5//ARID1A//ZFP36L1//CBL//CCNT2//CTNND2//EGR3//ELAVL2//FOXA1//FOXK2//AFF3//MLL//NR3C2//MNT//MYBL2//MYCL1//PBX1//PLAG1//PLAGL2//POU2F1//ARID4A//SS18//TAF4B//TCF7//…
GO:0010629	negative regulation of gene expression	Biological process	61	802	583	14742	1.92328	6.3455e-07	0.000104017	6.19753	CUX1//DNMT3A//FOXO3//NR6A1//GLI2//MECP2//NFX1//NOTCH1//RNF2//TBL1X//NR2F2//ZNF148//NRIP1//NCOR1//NCOR2//HEXIM1//ZMYND11//ZHX1//KLF12//KDM6B//RCOR1//SIRT1//ZMYND8//NIPBL//BCOR//MOSPD1//GZF1//LCOR//JDP2//OSR1//SIRT5//FOXA1//NEDD4//OVOL2//FOXN3//EREG//FOXF2//NRG1//ILF3//ATP8B1//POU2F1//PURB//ARID4A//BASP1//CBX1//ZNF281//LANCL2//PHF12//CREBZF//SNX6//PCGF6//ZNF382//FOXK1//ZCCHC11//TNRC6A//TNRC6C//EIF2…
GO:0010556	regulation of macromolecule biosynthetic process	Biological process	171	3099	583	14742	1.39528	8.37928e-07	0.000132269	6.07679	E2F4//NPAT//CUX1//DNMT3A//FOXO3//NR6A1//GLI2//MECP2//NFX1//NOTCH1//RNF2//TBL1X//NR2F2//ZNF148//NRIP1//NCOR1//NCOR2//HEXIM1//ZMYND11//ZHX1//KLF12//KDM6B//RCOR1//SIRT1//ZMYND8//NIPBL//BCOR//MOSPD1//GZF1//LCOR//JDP2//OSR1//ESCO1//SIRT5//NR3C1//ARID1A//ZFP36L1//CBL//CCNT2//CTNND2//EGR3//ELAVL2//FOXA1//FOXK2//AFF3//MLL//NR3C2//MNT//MYBL2//MYCL1//PBX1//PLAG1//PLAGL2//POU2F1//ARID4A//SS18//TAF4B//TCF7//…
GO:0048858	cell projection morphogenesis	Biological process	50	617	583	14742	2.04915	1.14175e-06	0.000168112	5.94243	DCC//MAP1B//NOTCH1//WNT7B//ULK2//BCL11B//RTN4R//ABL2//COL4A3//DLX5//DPYSL2//EPHB2//GDNF//GLI2//ITGB3//MYH9//NEO1//PLXNA2//SCN1B//SDCBP//SLIT1//SOS1//EZR//ST8SIA4//UNC5C//NRP1//RANBP9//PLXNC1//SRGAP1//UNC5D//CELSR3//CHN1//PAFAH1B1//ATG7//BCL11A//E2F4//ONECUT2//TTLL3//BBS5//NLGN3//NEDD4//CDH2//SSH2//TIAM1//SEPT7//ASAP1//PARVA//SHANK3//FZD3//EPHA3
GO:0009059	macromolecule biosynthetic process	Biological process	206	3913	583	14742	1.33121	1.14388e-06	0.000168112	5.94162	ORC4//TOP1//CDC7//DBF4//KAT7//SIRT1//RRM2B//REV1//E2F4//NPAT//CUX1//DNMT3A//FOXO3//NR6A1//GLI2//MECP2//NFX1//NOTCH1//RNF2//TBL1X//NR2F2//ZNF148//NRIP1//NCOR1//NCOR2//HEXIM1//ZMYND11//ZHX1//KLF12//KDM6B//RCOR1//ZMYND8//NIPBL//BCOR//MOSPD1//GZF1//LCOR//JDP2//OSR1//RRN3//BMPR2//CCNT2//CEBPD//NR3C1//MAF//MLL//MNT//NFATC3//NFATC4//ARID4A//TAF4B//TAF12//RNMT//COPS2//NFAT5//ZBTB7B//POU2F1//BAZ1A//ESCO1/…
GO:0010468	regulation of gene expression	Biological process	175	3208	583	14742	1.3794	1.24962e-06	0.000177529	5.90322	E2F4//NPAT//CUX1//DNMT3A//FOXO3//NR6A1//GLI2//MECP2//NFX1//NOTCH1//RNF2//TBL1X//NR2F2//ZNF148//NRIP1//NCOR1//NCOR2//HEXIM1//ZMYND11//ZHX1//KLF12//KDM6B//RCOR1//SIRT1//ZMYND8//NIPBL//BCOR//MOSPD1//GZF1//LCOR//JDP2//OSR1//TRA2B//CELF3//MGMT//SIRT5//NR3C1//ARID1A//ZFP36L1//CBL//CCNT2//CTNND2//EGR3//ELAVL2//FOXA1//FOXK2//AFF3//MLL//NR3C2//MNT//MYBL2//MYCL1//PBX1//PLAG1//PLAGL2//POU2F1//ARID4A//SS18//…
GO:0019226	transmission of nerve impulse	Biological process	53	674	583	14742	1.9884	1.3447e-06	0.000179698	5.87138	GLUL//SLC38A1//SNCA//ABAT//ADCY3//AMPH//DLG2//GABRA1//GNAI2//GRIA2//GRM3//HTR1F//KCNA6//MYO5A//NOVA1//NPY1R//PAFAH1B1//PLCB3//PRKCB//SCN1B//SDCBP//BSN//HOMER1//AKAP5//KCNK10//SLC38A2//GNG12//GRIP2//SYT2//RAB14//LIN7C//KIF1B//EGR3//ZDHHC15//SCN1A//NF1//ARHGEF10//CDH2//USP46//SCN2A//QKI//CTNND2//YWHAG//NETO1//SHANK3//DPYSL2//PPP3CA//GDNF//MAP1B//SLIT1//EPHB2//NLGN3//CACNA2D2
GO:2001141	regulation of RNA biosynthetic process	Biological process	158	2832	583	14742	1.41076	1.38419e-06	0.000179698	5.85881	E2F4//NPAT//CUX1//DNMT3A//FOXO3//NR6A1//GLI2//MECP2//NFX1//NOTCH1//RNF2//TBL1X//NR2F2//ZNF148//NRIP1//NCOR1//NCOR2//HEXIM1//ZMYND11//ZHX1//KLF12//KDM6B//RCOR1//SIRT1//ZMYND8//NIPBL//BCOR//MOSPD1//GZF1//LCOR//JDP2//OSR1//SIRT5//NR3C1//ARID1A//ZFP36L1//CBL//CCNT2//CTNND2//EGR3//ELAVL2//FOXA1//FOXK2//AFF3//MLL//NR3C2//MNT//MYBL2//MYCL1//PBX1//PLAG1//PLAGL2//POU2F1//ARID4A//SS18//TAF4B//TCF7//TEAD1//…
GO:0051252	regulation of RNA metabolic process	Biological process	161	2899	583	14742	1.40432	1.39138e-06	0.000179698	5.85656	E2F4//NPAT//CUX1//DNMT3A//FOXO3//NR6A1//GLI2//MECP2//NFX1//NOTCH1//RNF2//TBL1X//NR2F2//ZNF148//NRIP1//NCOR1//NCOR2//HEXIM1//ZMYND11//ZHX1//KLF12//KDM6B//RCOR1//SIRT1//ZMYND8//NIPBL//BCOR//MOSPD1//GZF1//LCOR//JDP2//OSR1//TRA2B//CELF3//SIRT5//NR3C1//ARID1A//ZFP36L1//CBL//CCNT2//CTNND2//EGR3//ELAVL2//FOXA1//FOXK2//AFF3//MLL//NR3C2//MNT//MYBL2//MYCL1//PBX1//PLAG1//PLAGL2//POU2F1//ARID4A//SS18//TAF4B/…
GO:0035637	multicellular organismal signaling	Biological process	53	677	583	14742	1.97959	1.53697e-06	0.00018364	5.81334	GLUL//SLC38A1//SNCA//ABAT//ADCY3//AMPH//DLG2//GABRA1//GNAI2//GRIA2//GRM3//HTR1F//KCNA6//MYO5A//NOVA1//NPY1R//PAFAH1B1//PLCB3//PRKCB//SCN1B//SDCBP//BSN//HOMER1//AKAP5//KCNK10//SLC38A2//GNG12//GRIP2//SYT2//RAB14//LIN7C//KIF1B//EGR3//ZDHHC15//SCN1A//NF1//ARHGEF10//CDH2//USP46//SCN2A//QKI//CTNND2//YWHAG//NETO1//SHANK3//DPYSL2//PPP3CA//GDNF//MAP1B//SLIT1//EPHB2//NLGN3//CACNA2D2
GO:0006355	regulation of transcription, DNA-dependent	Biological process	157	2815	583	14742	1.41029	1.55046e-06	0.00018364	5.80954	E2F4//NPAT//CUX1//DNMT3A//FOXO3//NR6A1//GLI2//MECP2//NFX1//NOTCH1//RNF2//TBL1X//NR2F2//ZNF148//NRIP1//NCOR1//NCOR2//HEXIM1//ZMYND11//ZHX1//KLF12//KDM6B//RCOR1//SIRT1//ZMYND8//NIPBL//BCOR//MOSPD1//GZF1//LCOR//JDP2//OSR1//SIRT5//NR3C1//ARID1A//GABPB1//FOXK2//NFATC3//PRKCB//SMARCD2//TCF7//UBN1//FOXK1//LCORL//NEDD4//OVOL2//DLX5//FOXF2//FOXO1//HOXA11//ILF3//MLL//PSMD9//ZNF711//NCOA3//SERTAD2//MED13//M…
GO:0000902	cell morphogenesis	Biological process	62	843	583	14742	1.85974	1.58315e-06	0.00018364	5.80048	MYH9//CUL3//FOXF2//BCL11B//DCC//MAP1B//NOTCH1//WNT7B//ULK2//RTN4R//ABL2//COL4A3//DLX5//DPYSL2//EPHB2//GDNF//GLI2//ITGB3//NEO1//PLXNA2//SCN1B//SDCBP//SLIT1//SOS1//EZR//ST8SIA4//UNC5C//NRP1//RANBP9//PLXNC1//SRGAP1//UNC5D//CELSR3//CHN1//GNA12//PRPF40A//PALM2//BRWD3//EPHA3//FOXA1//SEPT7//PAFAH1B1//ATG7//FMNL2//BCL11A//VAMP3//E2F4//ONECUT2//TTLL3//BBS5//NLGN3//NEDD4//CDH2//SSH2//TIAM1//BASP1//ASAP1//P…
GO:0006351	transcription, DNA-dependent	Biological process	163	2950	583	14742	1.39718	1.59425e-06	0.00018364	5.79744	E2F4//NPAT//CUX1//DNMT3A//FOXO3//NR6A1//GLI2//MECP2//NFX1//NOTCH1//RNF2//TBL1X//NR2F2//ZNF148//NRIP1//NCOR1//NCOR2//HEXIM1//ZMYND11//ZHX1//KLF12//KDM6B//RCOR1//SIRT1//ZMYND8//NIPBL//BCOR//MOSPD1//GZF1//LCOR//JDP2//OSR1//RRN3//BMPR2//CCNT2//CEBPD//NR3C1//MAF//MLL//MNT//NFATC3//NFATC4//ARID4A//TAF4B//TAF12//RNMT//COPS2//NFAT5//ZBTB7B//POU2F1//SIRT5//ARID1A//ZFP36L1//CBL//CTNND2//EGR3//ELAVL2//FOXA1…
GO:0032990	cell part morphogenesis	Biological process	50	626	583	14742	2.01968	1.7379e-06	0.000193222	5.75998	DCC//MAP1B//NOTCH1//WNT7B//ULK2//BCL11B//RTN4R//ABL2//COL4A3//DLX5//DPYSL2//EPHB2//GDNF//GLI2//ITGB3//MYH9//NEO1//PLXNA2//SCN1B//SDCBP//SLIT1//SOS1//EZR//ST8SIA4//UNC5C//NRP1//RANBP9//PLXNC1//SRGAP1//UNC5D//CELSR3//CHN1//PAFAH1B1//ATG7//BCL11A//E2F4//ONECUT2//TTLL3//BBS5//NLGN3//NEDD4//CDH2//SSH2//TIAM1//SEPT7//ASAP1//PARVA//SHANK3//FZD3//EPHA3
GO:0010646	regulation of cell communication	Biological process	85	1292	583	14742	1.66358	1.7681e-06	0.000193222	5.75249	SNCA//ADRA2A//EREG//ERRFI1//SNX6//RAB7A//PCSK1//CACNA2D2//AKAP5//LANCL2//HOMER1//LDLRAP1//SCAI//BMPR2//GDF6//DPYSL2//NR3C1//NCOR1//CBL//NEDD4//SIRT1//NF1//ZEB2//FGF9//ONECUT2//PEG10//NOTCH1//SOSTDC1//ITGB3//PRKCB//CDH2//DDIT4//PSMD9//IRS2//SLC30A8//USP46//FOXO1//MID1//TAOK3//NOD2//MAGI2//FOXA1//NCOA3//GDNF//PELI1//CUL3//ADRBK2//MYH9//EDA//PIM2//ZDHHC17//PELI2//MIER1//ZMYND11//AFAP1L2//OVOL2//WNT7…
GO:0048731	system development	Biological process	168	3095	583	14742	1.37258	3.1415e-06	0.000331353	5.50286	CDH11//DLX5//GLI2//HOXA11//JAG2//PITX1//PRELP//WDR5//CHD7//EPHB2//EREG//FGF9//MYH9//VAV3//SIRT1//C1GALT1//OVOL2//NAA15//ARHGAP24//FOXO3//NRIP1//CRKL//FOXO1//EDNRA//NFATC3//STK4//NRP1//ZFP36L1//QKI//HIPK1//PBX1//OSR1//GDNF//NF1//NIPBL//RDH10//ZEB2//CELSR3//MARK1//PAFAH1B1//NR2F2//NAV1//MDGA1//WFS1//RRM2B//AQP11//FOXF2//FZD3//NOTCH1//ONECUT2//ATG7//WNT7B//BBS5//CDH13//EGR3//NCOR1//NPY1R//NKX2-2//BC…
GO:0044260	cellular macromolecule metabolic process	Biological process	300	6231	583	14742	1.21745	3.18758e-06	0.000331353	5.49654	ERO1L//SIRT1//MRE11A//ORC4//TOP1//CDC7//DBF4//KAT7//RRM2B//REV1//CCNT2//E2F4//NPAT//CUX1//DNMT3A//FOXO3//NR6A1//GLI2//MECP2//NFX1//NOTCH1//RNF2//TBL1X//NR2F2//ZNF148//NRIP1//NCOR1//NCOR2//HEXIM1//ZMYND11//ZHX1//KLF12//KDM6B//RCOR1//ZMYND8//NIPBL//BCOR//MOSPD1//GZF1//LCOR//JDP2//OSR1//GNAI2//MAP3K1//MAP3K2//NOD2//TAB3//PSMB2//PSMD9//UBE2D1//UBE2V2//TNKS//UBR5//CHFR//NEDD4//HERC3//ZFP36L1//EIF4E//E…
GO:0007268	synaptic transmission	Biological process	48	607	583	14742	1.99959	3.71824e-06	0.000377313	5.42966	GLUL//SLC38A1//SNCA//ABAT//RAB14//SLC38A2//LIN7C//SYT2//KIF1B//EGR3//ZDHHC15//NF1//USP46//CTNND2//YWHAG//NETO1//SHANK3//AMPH//DPYSL2//GRM3//PPP3CA//GNAI2//GDNF//MAP1B//SLIT1//EPHB2//NLGN3//CACNA2D2//ADCY3//DLG2//GABRA1//GRIA2//HTR1F//KCNA6//MYO5A//NOVA1//NPY1R//PAFAH1B1//PLCB3//PRKCB//SCN1B//SDCBP//BSN//HOMER1//AKAP5//KCNK10//GNG12//GRIP2
GO:0048519	negative regulation of biological process	Biological process	156	2838	583	14742	1.38995	4.05474e-06	0.000401891	5.39204	MRE11A//ORC4//PSMB2//PSMD9//UBE2D1//CDC7//DBF4//FOXN3//CUX1//DNMT3A//FOXO3//NR6A1//GLI2//MECP2//NFX1//NOTCH1//RNF2//TBL1X//NR2F2//ZNF148//NRIP1//NCOR1//NCOR2//HEXIM1//ZMYND11//ZHX1//KLF12//KDM6B//RCOR1//SIRT1//ZMYND8//NIPBL//BCOR//MOSPD1//GZF1//LCOR//JDP2//OSR1//NF1//IRS2//TWF1//ERRFI1//SNX6//SIRT5//FOXO1//GDNF//NR3C1//NRG1//MCL1//SNCA//PIM2//AVEN//WNK3//MAP1B//MID1//EIF4G2//CUL5//CUL3//CHFR//CDH…
GO:0007409	axonogenesis	Biological process	41	490	583	14742	2.1158	4.9854e-06	0.000482904	5.3023	ABL2//COL4A3//DCC//DLX5//DPYSL2//EPHB2//GDNF//GLI2//ITGB3//MYH9//NEO1//PLXNA2//SCN1B//SDCBP//SLIT1//SOS1//EZR//ST8SIA4//UNC5C//NRP1//RANBP9//PLXNC1//SRGAP1//UNC5D//CELSR3//CHN1//MAP1B//PAFAH1B1//ATG7//BCL11A//NLGN3//CDH2//RTN4R//SSH2//TIAM1//FZD3//EPHA3//NOTCH1//WNT7B//ULK2//BCL11B
GO:0006366	transcription from RNA polymerase II promoter	Biological process	80	1227	583	14742	1.64867	5.2293e-06	0.000488887	5.28156	E2F4//NPAT//CUX1//DNMT3A//FOXO3//NR6A1//GLI2//MECP2//NFX1//NOTCH1//RNF2//TBL1X//NR2F2//ZNF148//NRIP1//NCOR1//NCOR2//HEXIM1//ZMYND11//ZHX1//KLF12//KDM6B//RCOR1//SIRT1//ZMYND8//NIPBL//BCOR//MOSPD1//GZF1//LCOR//JDP2//OSR1//GABPB1//FOXK2//NFATC3//PRKCB//SMARCD2//TCF7//ARID1A//UBN1//FOXK1//LCORL//TAF4B//TAF12//MED13//PPARGC1A//CCNT2//NEDD4//DLX5//EN2//FOXF2//FOXO1//GDNF//FOXA1//MLL//NKX2-2//PBX1//PITX…
GO:0010605	negative regulation of macromolecule metabolic process	Biological process	74	1108	583	14742	1.68881	5.29627e-06	0.000488887	5.27603	CUX1//DNMT3A//FOXO3//NR6A1//GLI2//MECP2//NFX1//NOTCH1//RNF2//TBL1X//NR2F2//ZNF148//NRIP1//NCOR1//NCOR2//HEXIM1//ZMYND11//ZHX1//KLF12//KDM6B//RCOR1//SIRT1//ZMYND8//NIPBL//BCOR//MOSPD1//GZF1//LCOR//JDP2//OSR1//SIRT5//FOXA1//PLAG1//ZNF281//BCL11A//NEDD4//OVOL2//FOXN3//EREG//FOXF2//NRG1//ILF3//ATP8B1//POU2F1//PURB//ARID4A//BASP1//CBX1//LANCL2//PHF12//CREBZF//SNX6//PCGF6//ZNF382//FOXK1//FXR1//ZCCHC11/…
GO:0009892	negative regulation of metabolic process	Biological process	80	1228	583	14742	1.64733	5.39129e-06	0.000488887	5.26831	CUX1//DNMT3A//FOXO3//NR6A1//GLI2//MECP2//NFX1//NOTCH1//RNF2//TBL1X//NR2F2//ZNF148//NRIP1//NCOR1//NCOR2//HEXIM1//ZMYND11//ZHX1//KLF12//KDM6B//RCOR1//SIRT1//ZMYND8//NIPBL//BCOR//MOSPD1//GZF1//LCOR//JDP2//OSR1//SIRT5//ADCY3//GNAI2//NPY1R//ADRA2A//GRM3//FOXA1//PLAG1//ZNF281//BCL11A//NEDD4//OVOL2//FOXN3//EREG//FOXF2//NRG1//ILF3//ATP8B1//POU2F1//PURB//ARID4A//BASP1//CBX1//LANCL2//PHF12//CREBZF//SNX6//P…
GO:0032774	RNA biosynthetic process	Biological process	164	3036	583	14742	1.36593	5.87649e-06	0.000521784	5.23088	E2F4//NPAT//CUX1//DNMT3A//FOXO3//NR6A1//GLI2//MECP2//NFX1//NOTCH1//RNF2//TBL1X//NR2F2//ZNF148//NRIP1//NCOR1//NCOR2//HEXIM1//ZMYND11//ZHX1//KLF12//KDM6B//RCOR1//SIRT1//ZMYND8//NIPBL//BCOR//MOSPD1//GZF1//LCOR//JDP2//OSR1//RRN3//BMPR2//CCNT2//CEBPD//NR3C1//MAF//MLL//MNT//NFATC3//NFATC4//ARID4A//TAF4B//TAF12//RNMT//COPS2//NFAT5//ZBTB7B//POU2F1//SIRT5//ARID1A//BAZ1A//CREBZF//ZFP36L1//CBL//CTNND2//EGR3…
GO:0030326	embryonic limb morphogenesis	Biological process	15	98	583	14742	3.87037	6.61915e-06	0.000564217	5.1792	OSR1//RDH10//AFF3//NOTCH1//PITX1//CHD7//NIPBL//GLI2//GNA12//HOXA11//FLVCR1//LMBR1//DLX5//FGF9//PBX1
GO:0035113	embryonic appendage morphogenesis	Biological process	15	98	583	14742	3.87037	6.61915e-06	0.000564217	5.1792	DLX5//FGF9//HOXA11//PBX1//OSR1//RDH10//AFF3//NOTCH1//PITX1//CHD7//NIPBL//GLI2//GNA12//FLVCR1//LMBR1
GO:0009966	regulation of signal transduction	Biological process	96	1563	583	14742	1.5531	6.80994e-06	0.000569097	5.16686	MAP3K2//NOD2//TAB3//ADRA2A//EREG//ERRFI1//SNX6//RAB7A//WNT7B//RIC8B//GLI2//LANCL2//HOMER1//LDLRAP1//SCAI//SNCA//PJA2//AKAP5//HIPK1//BMPR2//GDF6//NCOR1//CBL//NEDD4//ZEB2//FGF9//NR3C1//ONECUT2//PEG10//SIRT1//NOTCH1//SOSTDC1//ITGB3//PRKCB//MYO5A//ZCCHC11//DDIT4//IQSEC2//ASAP1//CHN1//NF1//EPHA3//PAFAH1B1//RASAL2//SOS1//NBR1//FOXO1//MID1//TAOK3//MAGI2//FOXA1//NCOA3//PELI1//CDH2//TIAM1//ARHGEF10//VAV3/…
GO:0048667	cell morphogenesis involved in neuron differentiation	Biological process	43	532	583	14742	2.04383	7.02488e-06	0.000575687	5.15336	DCC//MAP1B//NOTCH1//WNT7B//ULK2//BCL11B//RTN4R//ABL2//COL4A3//DLX5//DPYSL2//EPHB2//GDNF//GLI2//ITGB3//MYH9//NEO1//PLXNA2//SCN1B//SDCBP//SLIT1//SOS1//EZR//ST8SIA4//UNC5C//NRP1//RANBP9//PLXNC1//SRGAP1//UNC5D//CELSR3//CHN1//PAFAH1B1//ATG7//BCL11A//NLGN3//NEDD4//CDH2//SSH2//TIAM1//SHANK3//FZD3//EPHA3
GO:0048522	positive regulation of cellular process	Biological process	154	2821	583	14742	1.3804	7.15895e-06	0.000575687	5.14515	TAP2//SNCA//VAMP3//EDNRA//ITGB3//SIRT1//CLIP3//PELI2//BMPR2//CDH13//EGR3//NF1//NRP1//NOTCH1//FGF9//IRS2//MAGI2//ADRA2A//EREG//NR3C1//ARID1A//COL4A3//DCC//FOXO3//PLAGL2//STK4//WNT7B//PSMB2//PSMD9//ADCY3//LYST//CD47//FGF5//FLT3LG//GLI2//GNAI2//PBX1//CDC7//CUL3//SOS1//TIAM1//VAV3//ARHGEF3//CUL5//FOXA1//LANCL2//HOMER1//LDLRAP1//PIM2//LMAN1//HOXA11//AKAP5//WNK3//NID1//GDF6//ABHD5//ABL2//EPHA3//BCL11A/…
GO:0032989	cellular component morphogenesis	Biological process	62	888	583	14742	1.7655	8.46733e-06	0.000668292	5.07225	SS18//STK4//CUL3//MYH9//PAFAH1B1//FOXF2//BCL11B//DCC//MAP1B//NOTCH1//WNT7B//ULK2//RTN4R//ABL2//COL4A3//DLX5//DPYSL2//EPHB2//GDNF//GLI2//ITGB3//NEO1//PLXNA2//SCN1B//SDCBP//SLIT1//SOS1//EZR//ST8SIA4//UNC5C//NRP1//RANBP9//PLXNC1//SRGAP1//UNC5D//CELSR3//CHN1//GNA12//PRPF40A//PALM2//BRWD3//EPHA3//FOXA1//SEPT7//ATG7//FMNL2//BCL11A//VAMP3//E2F4//ONECUT2//TTLL3//BBS5//NLGN3//NEDD4//CDH2//SSH2//TIAM1//BAS…
GO:0048812	neuron projection morphogenesis	Biological process	43	537	583	14742	2.0248	8.86824e-06	0.000687208	5.05216	DCC//MAP1B//NOTCH1//WNT7B//ULK2//BCL11B//RTN4R//ABL2//COL4A3//DLX5//DPYSL2//EPHB2//GDNF//GLI2//ITGB3//MYH9//NEO1//PLXNA2//SCN1B//SDCBP//SLIT1//SOS1//EZR//ST8SIA4//UNC5C//NRP1//RANBP9//PLXNC1//SRGAP1//UNC5D//CELSR3//CHN1//PAFAH1B1//ATG7//BCL11A//NLGN3//NEDD4//CDH2//SSH2//TIAM1//SHANK3//FZD3//EPHA3
GO:0009893	positive regulation of metabolic process	Biological process	98	1617	583	14742	1.53251	9.40776e-06	0.000715998	5.02651	SNCA//VAMP3//EDNRA//ITGB3//SIRT1//CLIP3//PELI2//MAGI2//NR3C1//ARID1A//ADCY3//NOTCH1//PIM2//FGF9//PLAG1//WNT7B//NCOA3//QKI//OSR1//WNK3//BMPR2//GDF6//ABHD5//IRS2//FOXO1//PPARGC1A//DLX5//FOXF2//FOXO3//GLI2//HOXA11//ILF3//MLL//NPAT//PSMD9//TBL1X//NR2F2//ZNF711//NRIP1//SERTAD2//MED13//MAP3K2//FOXJ3//ZNF281//KDM3A//OVOL2//NAA15//AFAP1L2//FOXK1//AKAP5//NCOR1//NIPBL//UBE2D1//WFS1//PELI1//ATG7//MRE11A//RA…
GO:0009890	negative regulation of biosynthetic process	Biological process	64	931	583	14742	1.73827	9.85931e-06	0.000726391	5.00615	CUX1//DNMT3A//FOXO3//NR6A1//GLI2//MECP2//NFX1//NOTCH1//RNF2//TBL1X//NR2F2//ZNF148//NRIP1//NCOR1//NCOR2//HEXIM1//ZMYND11//ZHX1//KLF12//KDM6B//RCOR1//SIRT1//ZMYND8//NIPBL//BCOR//MOSPD1//GZF1//LCOR//JDP2//OSR1//SIRT5//ADCY3//GNAI2//NPY1R//ADRA2A//GRM3//NEDD4//OVOL2//FOXN3//EREG//FOXF2//NRG1//ILF3//ATP8B1//POU2F1//PURB//ARID4A//BASP1//CBX1//ZNF281//LANCL2//PHF12//CREBZF//SNX6//PCGF6//ZNF382//FOXK1//F…
GO:0045934	negative regulation of nucleobase-containing compound metabolic process	Biological process	60	854	583	14742	1.77657	9.88519e-06	0.000726391	5.00502	CUX1//DNMT3A//FOXO3//NR6A1//GLI2//MECP2//NFX1//NOTCH1//RNF2//TBL1X//NR2F2//ZNF148//NRIP1//NCOR1//NCOR2//HEXIM1//ZMYND11//ZHX1//KLF12//KDM6B//RCOR1//SIRT1//ZMYND8//NIPBL//BCOR//MOSPD1//GZF1//LCOR//JDP2//OSR1//SIRT5//ADCY3//GNAI2//NPY1R//ADRA2A//GRM3//NEDD4//OVOL2//FOXN3//EREG//FOXF2//NRG1//ILF3//ATP8B1//POU2F1//PURB//ARID4A//BASP1//CBX1//ZNF281//LANCL2//PHF12//CREBZF//SNX6//PCGF6//ZNF382//FOXK1//E…
GO:0045892	negative regulation of transcription, DNA-dependent	Biological process	53	723	583	14742	1.85364	1.04082e-05	0.000739087	4.98262	CUX1//DNMT3A//FOXO3//NR6A1//GLI2//MECP2//NFX1//NOTCH1//RNF2//TBL1X//NR2F2//ZNF148//NRIP1//NCOR1//NCOR2//HEXIM1//ZMYND11//ZHX1//KLF12//KDM6B//RCOR1//SIRT1//ZMYND8//NIPBL//BCOR//MOSPD1//GZF1//LCOR//JDP2//OSR1//SIRT5//NEDD4//OVOL2//MIER1//FOXN3//EREG//FOXF2//NRG1//ILF3//ATP8B1//POU2F1//PURB//ARID4A//BASP1//CBX1//ZNF281//LANCL2//PHF12//CREBZF//SNX6//PCGF6//ZNF382//FOXK1
GO:0007389	pattern specification process	Biological process	34	385	583	14742	2.23309	1.04863e-05	0.000739087	4.97938	EDNRA//NFATC3//STK4//NRP1//PLXNA2//ZEB2//GDNF//HOXA11//OVOL2//BBS5//BASP1//NOTCH1//GLI2//WNT7B//RNF2//BMPR2//CRKL//PBX1//NR2F2//DLX5//NKX2-2//BCOR//OSR1//FOXN3//FOXF2//FOXO1//FOXO3//FOXA1//FOXK2//MID1//FOXJ3//SOSTDC1//FOXP4//FOXK1
GO:0031324	negative regulation of cellular metabolic process	Biological process	74	1130	583	14742	1.65593	1.05782e-05	0.000739087	4.97559	CUX1//DNMT3A//FOXO3//NR6A1//GLI2//MECP2//NFX1//NOTCH1//RNF2//TBL1X//NR2F2//ZNF148//NRIP1//NCOR1//NCOR2//HEXIM1//ZMYND11//ZHX1//KLF12//KDM6B//RCOR1//SIRT1//ZMYND8//NIPBL//BCOR//MOSPD1//GZF1//LCOR//JDP2//OSR1//SIRT5//ADCY3//GNAI2//NPY1R//ADRA2A//GRM3//NEDD4//OVOL2//FOXN3//EREG//FOXF2//NRG1//ILF3//ATP8B1//POU2F1//PURB//ARID4A//BASP1//CBX1//ZNF281//LANCL2//PHF12//CREBZF//SNX6//PCGF6//ZNF382//FOXK1//F…
GO:0010604	positive regulation of macromolecule metabolic process	Biological process	90	1458	583	14742	1.56089	1.14343e-05	0.000763331	4.94179	SNCA//VAMP3//EDNRA//ITGB3//SIRT1//CLIP3//PELI2//MAGI2//NR3C1//ARID1A//NOTCH1//FGF9//PLAG1//WNT7B//NCOA3//QKI//OSR1//WNK3//BMPR2//GDF6//DLX5//FOXF2//FOXO1//FOXO3//GLI2//HOXA11//ILF3//MLL//NPAT//PSMD9//TBL1X//NR2F2//ZNF711//NRIP1//SERTAD2//MED13//MAP3K2//PPARGC1A//PIM2//FOXJ3//ZNF281//KDM3A//OVOL2//NAA15//AFAP1L2//FOXK1//NCOR1//NIPBL//UBE2D1//WFS1//PELI1//ATG7//MRE11A//RAP2B//TNKS//LATS1//EREG//SOA…
GO:0031327	negative regulation of cellular biosynthetic process	Biological process	63	916	583	14742	1.73913	1.14513e-05	0.000763331	4.94114	CUX1//DNMT3A//FOXO3//NR6A1//GLI2//MECP2//NFX1//NOTCH1//RNF2//TBL1X//NR2F2//ZNF148//NRIP1//NCOR1//NCOR2//HEXIM1//ZMYND11//ZHX1//KLF12//KDM6B//RCOR1//SIRT1//ZMYND8//NIPBL//BCOR//MOSPD1//GZF1//LCOR//JDP2//OSR1//SIRT5//ADCY3//GNAI2//NPY1R//ADRA2A//GRM3//NEDD4//OVOL2//FOXN3//EREG//FOXF2//NRG1//ILF3//ATP8B1//POU2F1//PURB//ARID4A//BASP1//CBX1//ZNF281//LANCL2//PHF12//CREBZF//SNX6//PCGF6//ZNF382//FOXK1//F…
GO:0048736	appendage development	Biological process	17	128	583	14742	3.35836	1.16416e-05	0.000763331	4.93399	DLX5//FGF9//HOXA11//PBX1//FLVCR1//OSR1//RDH10//AFF3//NOTCH1//PITX1//CHD7//NIPBL//GLI2//GNA12//LMBR1//NR2F2//PLXNA2
GO:0060173	limb development	Biological process	17	128	583	14742	3.35836	1.16416e-05	0.000763331	4.93399	DLX5//FGF9//HOXA11//PBX1//FLVCR1//OSR1//RDH10//AFF3//NOTCH1//PITX1//CHD7//NIPBL//GLI2//GNA12//LMBR1//PLXNA2//NR2F2
GO:0000904	cell morphogenesis involved in differentiation	Biological process	48	634	583	14742	1.91443	1.19673e-05	0.000772797	4.922	CUL3//FOXF2//BCL11B//DCC//MAP1B//NOTCH1//WNT7B//ULK2//RTN4R//ABL2//COL4A3//DLX5//DPYSL2//EPHB2//GDNF//GLI2//ITGB3//MYH9//NEO1//PLXNA2//SCN1B//SDCBP//SLIT1//SOS1//EZR//ST8SIA4//UNC5C//NRP1//RANBP9//PLXNC1//SRGAP1//UNC5D//CELSR3//CHN1//EPHA3//FOXA1//PAFAH1B1//ATG7//BCL11A//VAMP3//NLGN3//NEDD4//CDH2//SSH2//TIAM1//BASP1//SHANK3//FZD3
GO:0035107	appendage morphogenesis	Biological process	16	116	583	14742	3.48779	1.29131e-05	0.000809345	4.88897	DLX5//FGF9//HOXA11//PBX1//FLVCR1//OSR1//RDH10//AFF3//NOTCH1//PITX1//CHD7//NIPBL//GLI2//GNA12//LMBR1//PLXNA2
GO:0035108	limb morphogenesis	Biological process	16	116	583	14742	3.48779	1.29131e-05	0.000809345	4.88897	DLX5//FGF9//HOXA11//PBX1//OSR1//RDH10//AFF3//NOTCH1//PITX1//CHD7//NIPBL//GLI2//GNA12//FLVCR1//LMBR1//PLXNA2
GO:0051172	negative regulation of nitrogen compound metabolic process	Biological process	60	862	583	14742	1.76008	1.31166e-05	0.000810186	4.88218	CUX1//DNMT3A//FOXO3//NR6A1//GLI2//MECP2//NFX1//NOTCH1//RNF2//TBL1X//NR2F2//ZNF148//NRIP1//NCOR1//NCOR2//HEXIM1//ZMYND11//ZHX1//KLF12//KDM6B//RCOR1//SIRT1//ZMYND8//NIPBL//BCOR//MOSPD1//GZF1//LCOR//JDP2//OSR1//SIRT5//ADCY3//GNAI2//NPY1R//ADRA2A//GRM3//NEDD4//OVOL2//FOXN3//EREG//FOXF2//NRG1//ILF3//ATP8B1//POU2F1//PURB//ARID4A//BASP1//CBX1//ZNF281//LANCL2//PHF12//CREBZF//SNX6//PCGF6//ZNF382//FOXK1//E…
GO:0007399	nervous system development	Biological process	96	1590	583	14742	1.52673	1.37813e-05	0.000839086	4.86071	CELSR3//MARK1//PAFAH1B1//NR2F2//NAV1//MDGA1//STK4//OVOL2//FZD3//ZEB2//NOTCH1//NF1//DCC//MAP1B//WNT7B//ULK2//BCL11B//RTN4R//ABL2//COL4A3//DLX5//DPYSL2//EPHB2//GDNF//GLI2//ITGB3//MYH9//NEO1//PLXNA2//SCN1B//SDCBP//SLIT1//SOS1//EZR//ST8SIA4//UNC5C//NRP1//RANBP9//PLXNC1//SRGAP1//UNC5D//CDH2//NLGN3//TIMP3//CHD7//B3GNT5//BMPR2//NR3C1//NKX2-2//TCF7//IRS2//SYNJ2//SLC7A11//NIPBL//EGR3//CHN1//JAG2//FGF5//EP…
GO:0048518	positive regulation of biological process	Biological process	165	3104	583	14742	1.34416	1.41013e-05	0.000846473	4.85074	GDNF//HOXA11//ADRA2A//EREG//PELI1//TAP2//SNCA//VAMP3//EDNRA//ITGB3//SIRT1//CLIP3//PELI2//BMPR2//CDH13//EGR3//NF1//NRP1//NOTCH1//FGF9//IRS2//MAGI2//MAP3K1//MAP2K4//NOD2//TAB3//PDE5A//NR3C1//ARID1A//COL4A3//DCC//FOXO3//PLAGL2//STK4//WNT7B//PSMB2//PSMD9//ADCY3//LYST//CD47//FGF5//FLT3LG//GLI2//GNAI2//PBX1//CDC7//CUL3//SOS1//TIAM1//VAV3//ARHGEF3//CUL5//FOXA1//LANCL2//HOMER1//LDLRAP1//PIM2//PLAG1//NCOA…
GO:0007267	cell-cell signaling	Biological process	68	1021	583	14742	1.68411	1.45097e-05	0.000858892	4.83834	GLUL//SLC38A1//GDNF//HOXA11//SNCA//ABAT//ADCY3//AMPH//DLG2//GABRA1//GNAI2//GRIA2//GRM3//HTR1F//KCNA6//MYO5A//NOVA1//NPY1R//PAFAH1B1//PLCB3//PRKCB//SCN1B//SDCBP//BSN//HOMER1//AKAP5//KCNK10//SLC38A2//GNG12//GRIP2//SYT2//RAB14//LIN7C//KIF1B//EGR3//ADRA2A//PCSK1//CACNA2D2//DPYSL2//NR3C1//ZDHHC15//NF1//GLI2//SLC30A8//ILDR2//PSMD9//IRS2//USP46//PPP3CA//CTNND2//YWHAG//NETO1//SHANK3//MAP1B//SLIT1//EPHB2/…
GO:2000113	negative regulation of cellular macromolecule biosynthetic process	Biological process	57	810	583	14742	1.77942	1.5946e-05	0.000930981	4.79735	CUX1//DNMT3A//FOXO3//NR6A1//GLI2//MECP2//NFX1//NOTCH1//RNF2//TBL1X//NR2F2//ZNF148//NRIP1//NCOR1//NCOR2//HEXIM1//ZMYND11//ZHX1//KLF12//KDM6B//RCOR1//SIRT1//ZMYND8//NIPBL//BCOR//MOSPD1//GZF1//LCOR//JDP2//OSR1//SIRT5//NEDD4//OVOL2//FOXN3//EREG//FOXF2//NRG1//ILF3//ATP8B1//POU2F1//PURB//ARID4A//BASP1//CBX1//ZNF281//LANCL2//PHF12//CREBZF//SNX6//PCGF6//ZNF382//FOXK1//FXR1//MIER1//MRE11A//TNRC6A//EIF2C4
GO:0007165	signal transduction	Biological process	200	3923	583	14742	1.28914	1.72492e-05	0.000993462	4.76323	MAP3K1//NF1//TAOK3//MAP3K2//NOD2//TAB3//GNAI2//MAP2K4//PELI2//PELI1//NOTCH1//MAGI2//MARK1//TCF7//WNT7B//CUL3//TNKS//SOSTDC1//CSNK1G1//FAM123B//NRG1//MPZL1//ADCY3//CRKL//DGKG//PLCB3//PRKCB//SDCBP//CORO2A//DGKZ//SH2B3//BMPR2//ADRA2A//EREG//ERRFI1//SNX6//PSMB2//PSMD9//WFS1//GOSR2//CBL//COL4A3//KLRG1//FOXO1//FOXO3//PIK3R1//SOS1//ADAM12//RAB7A//UBE2D1//PTPRD//EDNRA//CELSR3//GNA12//GRM3//ATRNL1//GNG12/…
GO:0006464	protein modification process	Biological process	127	2267	583	14742	1.41658	1.80145e-05	0.0010237	4.74438	ERO1L//CCNT2//GNAI2//MAP3K1//MAP3K2//NOD2//TAB3//PSMB2//PSMD9//UBE2D1//UBE2V2//TNKS//UBR5//CHFR//NEDD4//HERC3//BCOR//EDNRA//ITGB3//SIRT1//CLIP3//PELI2//ADRA2A//EREG//ERRFI1//SNX6//CBL//CUL3//PJA2//MARCH6//FBXW2//DCAF6//MARCH4//KCTD10//ABL2//ADRBK2//EPHB2//GMFB//MARK1//PRKCB//MAP2K4//STK4//LATS1//PIM2//ICK//TAOK3//WNK3//NF1//YWHAG//PPM1E//PPP1R12A//PPP3CA//PTPRD//SBF1//PTPN21//SSH2//NAA15//SIRT5//…
GO:0009790	embryo development	Biological process	56	799	583	14742	1.77227	2.12998e-05	0.00119447	4.67162	EDNRA//GLI2//GNA12//JAG2//MYH9//NOTCH1//WNT7B//CUL3//FLVCR1//CHD7//RDH10//RNF2//BMPR2//PLXNA2//ZEB2//STK4//OVOL2//FZD3//BBS5//BASP1//HOXA11//SEPT7//NF1//DLX5//FGF9//PBX1//POU2F1//OSR1//AFF3//PITX1//NIPBL//FLT3LG//MLL//SH2B3//TOP1//EPHB2//SOBP//LMBR1//DNMT3A//FOXF2//FOXP4//KIAA1217//GDNF//CTHRC1//FOXN3//FOXO1//FOXO3//NRG1//FOXA1//FOXK2//MAP1B//PCSK1//NRG2//FOXJ3//RAB14//FOXK1
GO:0010558	negative regulation of macromolecule biosynthetic process	Biological process	58	838	583	14742	1.75014	2.17325e-05	0.00120291	4.66289	CUX1//DNMT3A//FOXO3//NR6A1//GLI2//MECP2//NFX1//NOTCH1//RNF2//TBL1X//NR2F2//ZNF148//NRIP1//NCOR1//NCOR2//HEXIM1//ZMYND11//ZHX1//KLF12//KDM6B//RCOR1//SIRT1//ZMYND8//NIPBL//BCOR//MOSPD1//GZF1//LCOR//JDP2//OSR1//SIRT5//NEDD4//OVOL2//FOXN3//EREG//FOXF2//NRG1//ILF3//ATP8B1//POU2F1//PURB//ARID4A//BASP1//CBX1//ZNF281//LANCL2//PHF12//CREBZF//SNX6//PCGF6//ZNF382//FOXK1//FXR1//MIER1//MRE11A//TNRC6A//EIF2C4/…
GO:0051253	negative regulation of RNA metabolic process	Biological process	53	748	583	14742	1.79169	2.66357e-05	0.0014554	4.57454	CUX1//DNMT3A//FOXO3//NR6A1//GLI2//MECP2//NFX1//NOTCH1//RNF2//TBL1X//NR2F2//ZNF148//NRIP1//NCOR1//NCOR2//HEXIM1//ZMYND11//ZHX1//KLF12//KDM6B//RCOR1//SIRT1//ZMYND8//NIPBL//BCOR//MOSPD1//GZF1//LCOR//JDP2//OSR1//SIRT5//NEDD4//OVOL2//FOXN3//EREG//FOXF2//NRG1//ILF3//ATP8B1//POU2F1//PURB//ARID4A//BASP1//CBX1//ZNF281//LANCL2//PHF12//CREBZF//SNX6//PCGF6//ZNF382//FOXK1//MIER1
GO:0022008	neurogenesis	Biological process	67	1021	583	14742	1.65935	2.69828e-05	0.00145571	4.56891	CELSR3//MARK1//PAFAH1B1//NR2F2//NAV1//MDGA1//NOTCH1//NF1//DCC//MAP1B//WNT7B//ULK2//BCL11B//RTN4R//ABL2//COL4A3//DLX5//DPYSL2//EPHB2//GDNF//GLI2//ITGB3//MYH9//NEO1//PLXNA2//SCN1B//SDCBP//SLIT1//SOS1//EZR//ST8SIA4//UNC5C//NRP1//RANBP9//PLXNC1//SRGAP1//UNC5D//CHN1//JAG2//FGF5//EPHA3//BCL11A//NKX2-2//IGSF9//MDGA2//SHANK3//ATG7//ARHGEF10//FZD3//NEDD4//CUX1//DLG2//YWHAG//PBX1//FOXA1//GDF6//DGKG//EN2//N…
GO:0048699	generation of neurons	Biological process	64	964	583	14742	1.67877	2.91282e-05	0.0015518	4.53569	CELSR3//MARK1//PAFAH1B1//NR2F2//NAV1//MDGA1//NOTCH1//NF1//DCC//MAP1B//WNT7B//ULK2//BCL11B//RTN4R//ABL2//COL4A3//DLX5//DPYSL2//EPHB2//GDNF//GLI2//ITGB3//MYH9//NEO1//PLXNA2//SCN1B//SDCBP//SLIT1//SOS1//EZR//ST8SIA4//UNC5C//NRP1//RANBP9//PLXNC1//SRGAP1//UNC5D//CHN1//JAG2//EPHA3//BCL11A//IGSF9//NKX2-2//MDGA2//SHANK3//ATG7//FZD3//NEDD4//CUX1//DLG2//YWHAG//PBX1//FOXA1//GDF6//DGKG//EN2//NLGN3//ONECUT2//C…
GO:0048468	cell development	Biological process	80	1292	583	14742	1.56572	3.37843e-05	0.00177764	4.47129	MYH9//EREG//FOXO3//PDE3A//PAFAH1B1//GDNF//ZEB2//OVOL2//CUL3//FOXF2//NOTCH1//E2F4//ONECUT2//GLI2//NKX2-2//BCL11B//NF1//DCC//MAP1B//WNT7B//ULK2//RTN4R//ABL2//COL4A3//DLX5//DPYSL2//EPHB2//ITGB3//NEO1//PLXNA2//SCN1B//SDCBP//SLIT1//SOS1//EZR//ST8SIA4//UNC5C//NRP1//RANBP9//PLXNC1//SRGAP1//UNC5D//CELSR3//CACNA2D2//CHN1//EPHA3//FOXA1//HOXA11//BCL11A//EDNRA//NRG1//RDH10//IGSF9//ZCCHC11//ATG7//ARHGEF10//NE…
GO:0043412	macromolecule modification	Biological process	129	2360	583	14742	1.38218	4.90881e-05	0.00255139	4.30902	ERO1L//CCNT2//GNAI2//MAP3K1//MAP3K2//NOD2//TAB3//PSMB2//PSMD9//UBE2D1//UBE2V2//TNKS//UBR5//CHFR//NEDD4//HERC3//BCOR//EDNRA//ITGB3//SIRT1//CLIP3//PELI2//ADRA2A//EREG//ERRFI1//SNX6//CBL//CUL3//PJA2//MARCH6//FBXW2//DCAF6//MARCH4//KCTD10//DNMT3A//MGMT//ABL2//ST8SIA4//ATG7//NAGPA//ADRBK2//EPHB2//GMFB//MARK1//PRKCB//MAP2K4//STK4//LATS1//PIM2//ICK//TAOK3//WNK3//NF1//YWHAG//PPM1E//PPP1R12A//PPP3CA//PTPRD…
GO:0030030	cell projection organization	Biological process	56	829	583	14742	1.70813	5.92139e-05	0.0030406	4.22758	SDCBP//CD2AP//DCC//MAP1B//NOTCH1//WNT7B//ULK2//BCL11B//RTN4R//ABL2//COL4A3//DLX5//DPYSL2//EPHB2//GDNF//GLI2//ITGB3//MYH9//NEO1//PLXNA2//SCN1B//SLIT1//SOS1//EZR//ST8SIA4//UNC5C//NRP1//RANBP9//PLXNC1//SRGAP1//UNC5D//CELSR3//CHN1//BBS5//SSH2//EPHA3//BCL11A//PAFAH1B1//IGSF9//ATG7//CDH13//VAV3//STX2//NEDD4//TTLL3//E2F4//ONECUT2//ASAP1//NLGN3//CDH2//TIAM1//CTHRC1//SEPT7//PARVA//SHANK3//FZD3
GO:0048589	developmental growth	Biological process	24	251	583	14742	2.41783	6.02928e-05	0.00305914	4.21973	FOXO3//EREG//MAGI2//BCL11A//NOTCH1//TIMP3//MYO5A//MREG//MAP1B//PAFAH1B1//NIPBL//DCC//NLGN3//SLIT1//NRP1//FGF9//NRG1//BASP1//RDH10//WNT7B//PLAG1//GLI2//HOXA11//NCOA3
GO:0043170	macromolecule metabolic process	Biological process	317	6871	583	14742	1.16661	7.59705e-05	0.00378741	4.11935	ERO1L//SIRT1//MRE11A//ORC4//TOP1//CDC7//DBF4//KAT7//RRM2B//REV1//CCNT2//E2F4//NPAT//CUX1//DNMT3A//FOXO3//NR6A1//GLI2//MECP2//NFX1//NOTCH1//RNF2//TBL1X//NR2F2//ZNF148//NRIP1//NCOR1//NCOR2//HEXIM1//ZMYND11//ZHX1//KLF12//KDM6B//RCOR1//ZMYND8//NIPBL//BCOR//MOSPD1//GZF1//LCOR//JDP2//OSR1//GNAI2//MAP3K1//MAP3K2//NOD2//TAB3//PSMB2//PSMD9//UBE2D1//UBE2V2//TNKS//UBR5//CHFR//NEDD4//HERC3//ZFP36L1//EIF4E//E…
GO:0006357	regulation of transcription from RNA polymerase II promoter	Biological process	66	1036	583	14742	1.61091	7.64237e-05	0.00378741	4.11677	E2F4//NPAT//CUX1//DNMT3A//FOXO3//NR6A1//GLI2//MECP2//NFX1//NOTCH1//RNF2//TBL1X//NR2F2//ZNF148//NRIP1//NCOR1//NCOR2//HEXIM1//ZMYND11//ZHX1//KLF12//KDM6B//RCOR1//SIRT1//ZMYND8//NIPBL//BCOR//MOSPD1//GZF1//LCOR//JDP2//OSR1//NEDD4//DLX5//EN2//FOXF2//FOXO1//GABPB1//GDNF//FOXA1//MLL//NFATC3//NKX2-2//PBX1//PITX1//PLAGL2//POU2F1//PPP3CA//SS18//NCOA3//ONECUT2//MED13//PPARGC1A//BCL11A//DCAF6//MKL2//BCL11B//…
GO:0030182	neuron differentiation	Biological process	58	890	583	14742	1.64788	0.000116639	0.00571398	3.93316	DCC//MAP1B//NOTCH1//WNT7B//ULK2//BCL11B//RTN4R//ABL2//COL4A3//DLX5//DPYSL2//EPHB2//GDNF//GLI2//ITGB3//MYH9//NEO1//PLXNA2//SCN1B//SDCBP//SLIT1//SOS1//EZR//ST8SIA4//UNC5C//NRP1//RANBP9//PLXNC1//SRGAP1//UNC5D//CELSR3//CHN1//JAG2//EPHA3//BCL11A//PAFAH1B1//IGSF9//NKX2-2//MDGA2//MDGA1//SHANK3//ATG7//NEDD4//CUX1//DLG2//YWHAG//PBX1//FOXA1//GDF6//DGKG//EN2//NLGN3//ONECUT2//CDH2//SSH2//TIAM1//CTHRC1//FZD3
GO:0016070	RNA metabolic process	Biological process	184	3668	583	14742	1.26846	0.000120649	0.00584326	3.91848	E2F4//NPAT//CUX1//DNMT3A//FOXO3//NR6A1//GLI2//MECP2//NFX1//NOTCH1//RNF2//TBL1X//NR2F2//ZNF148//NRIP1//NCOR1//NCOR2//HEXIM1//ZMYND11//ZHX1//KLF12//KDM6B//RCOR1//SIRT1//ZMYND8//NIPBL//BCOR//MOSPD1//GZF1//LCOR//JDP2//OSR1//ZFP36L1//EIF4E//EDC3//TRA2B//CELF3//FRG1//HNRNPC//HNRNPA3//RRN3//BMPR2//CCNT2//CEBPD//NR3C1//MAF//MLL//MNT//NFATC3//NFATC4//ARID4A//TAF4B//TAF12//RNMT//COPS2//NFAT5//ZBTB7B//POU2F…
GO:0001655	urogenital system development	Biological process	22	231	583	14742	2.40823	0.000128262	0.00614215	3.8919	GDNF//HOXA11//NF1//NIPBL//RDH10//GLI2//WFS1//RRM2B//C1GALT1//AQP11//OSR1//WNT7B//COL4A3//NID1//FOXA1//NOTCH1//PLAG1//MAGI2//BASP1//EDNRA//EPHB2//PBX1
GO:0022604	regulation of cell morphogenesis	Biological process	24	264	583	14742	2.29877	0.000132794	0.00628854	3.87682	GNA12//MYH9//EZR//PRPF40A//PALM2//BRWD3//EPHA3//NOTCH1//FOXA1//SEPT7//BCL11A//MAP1B//PAFAH1B1//DCC//NEDD4//SLIT1//NRP1//CDH2//CHN1//RTN4R//SSH2//TIAM1//GDNF//FMNL2
GO:0044249	cellular biosynthetic process	Biological process	229	4746	583	14742	1.2201	0.000137736	0.0064509	3.86095	ORC4//TOP1//CDC7//DBF4//KAT7//SIRT1//RRM2B//REV1//E2F4//NPAT//CUX1//DNMT3A//FOXO3//NR6A1//GLI2//MECP2//NFX1//NOTCH1//RNF2//TBL1X//NR2F2//ZNF148//NRIP1//NCOR1//NCOR2//HEXIM1//ZMYND11//ZHX1//KLF12//KDM6B//RCOR1//ZMYND8//NIPBL//BCOR//MOSPD1//GZF1//LCOR//JDP2//OSR1//ST8SIA4//RDH10//RRN3//BMPR2//CCNT2//CEBPD//NR3C1//MAF//MLL//MNT//NFATC3//NFATC4//ARID4A//TAF4B//TAF12//RNMT//COPS2//NFAT5//ZBTB7B//POU2F…
GO:0031325	positive regulation of cellular metabolic process	Biological process	89	1540	583	14742	1.46136	0.000145341	0.00673308	3.83761	SNCA//VAMP3//EDNRA//ITGB3//SIRT1//CLIP3//PELI2//MAGI2//NR3C1//ARID1A//ADCY3//NOTCH1//PIM2//WNK3//BMPR2//GDF6//ABHD5//IRS2//FOXO1//PPARGC1A//DLX5//FOXF2//FOXO3//GLI2//HOXA11//ILF3//MLL//NPAT//PSMD9//TBL1X//NR2F2//ZNF711//NCOA3//NRIP1//SERTAD2//MED13//MAP3K2//FOXJ3//ZNF281//KDM3A//OVOL2//NAA15//AFAP1L2//FOXK1//AKAP5//NCOR1//NIPBL//UBE2D1//WFS1//PELI1//ATG7//MRE11A//RAP2B//TNKS//ARHGEF10//LATS1//ERE…
GO:0048666	neuron development	Biological process	49	721	583	14742	1.7185	0.000150172	0.00688206	3.82341	DCC//MAP1B//NOTCH1//WNT7B//ULK2//BCL11B//RTN4R//ABL2//COL4A3//DLX5//DPYSL2//EPHB2//GDNF//GLI2//ITGB3//MYH9//NEO1//PLXNA2//SCN1B//SDCBP//SLIT1//SOS1//EZR//ST8SIA4//UNC5C//NRP1//RANBP9//PLXNC1//SRGAP1//UNC5D//CELSR3//CHN1//EPHA3//BCL11A//PAFAH1B1//IGSF9//ATG7//NEDD4//DLG2//NLGN3//ONECUT2//CDH2//SSH2//TIAM1//CTHRC1//SHANK3//FZD3//DGKG//EN2
GO:0031175	neuron projection development	Biological process	44	632	583	14742	1.76045	0.000193123	0.00875628	3.71417	DCC//MAP1B//NOTCH1//WNT7B//ULK2//BCL11B//RTN4R//ABL2//COL4A3//DLX5//DPYSL2//EPHB2//GDNF//GLI2//ITGB3//MYH9//NEO1//PLXNA2//SCN1B//SDCBP//SLIT1//SOS1//EZR//ST8SIA4//UNC5C//NRP1//RANBP9//PLXNC1//SRGAP1//UNC5D//CELSR3//CHN1//EPHA3//BCL11A//PAFAH1B1//IGSF9//ATG7//NLGN3//NEDD4//CDH2//SSH2//TIAM1//SHANK3//FZD3
GO:0051716	cellular response to stimulus	Biological process	228	4754	583	14742	1.21273	0.000215452	0.00966587	3.66665	SIRT1//ATG5//FOXN3//MAP3K1//NF1//TAOK3//MAP3K2//NOD2//TAB3//MRE11A//UBE2V2//GNAI2//MAP2K4//PELI2//PELI1//NOTCH1//MAGI2//MARK1//TCF7//WNT7B//CUL3//TNKS//SOSTDC1//CSNK1G1//FAM123B//ABL2//ADCY3//ADRA2A//ADRBK2//ANK3//CTNND2//DGKG//DPYSL2//EDA//EDNRA//STX2//FGF9//FLT3LG//GAS6//GDNF//GMFB//GNA12//GNL1//GRIA2//NR3C1//IGF2R//NR3C2//PPP1R12A//PDE3A//PDE4D//PDE7A//PIK3R1//PIK3R2//PPP2R5E//PRKCB//RAP2B//SO…
GO:0009968	negative regulation of signal transduction	Biological process	38	523	583	14742	1.83726	0.000227432	0.010097	3.64315	ERRFI1//SNX6//RAB7A//SNCA//NCOR1//FGF9//NR3C1//ONECUT2//PEG10//SIRT1//NOTCH1//SOSTDC1//NEDD4//DDIT4//FOXO1//MAGI2//NF1//CUL3//SCAI//ADRBK2//MYH9//CBL//ZMYND11//OVOL2//WNT7B//TAOK3//DGKZ//RASAL2//PRKCB//ADRA2A//CDH2//STK4//LATS1//DKK2//CTHRC1//FAM123B//GDNF//MCL1
GO:0009058	biosynthetic process	Biological process	231	4839	583	14742	1.2071	0.000255593	0.0112303	3.59245	ORC4//TOP1//CDC7//DBF4//KAT7//SIRT1//RRM2B//REV1//E2F4//NPAT//CUX1//DNMT3A//FOXO3//NR6A1//GLI2//MECP2//NFX1//NOTCH1//RNF2//TBL1X//NR2F2//ZNF148//NRIP1//NCOR1//NCOR2//HEXIM1//ZMYND11//ZHX1//KLF12//KDM6B//RCOR1//ZMYND8//NIPBL//BCOR//MOSPD1//GZF1//LCOR//JDP2//OSR1//ST8SIA4//RDH10//RRN3//BMPR2//CCNT2//CEBPD//NR3C1//MAF//MLL//MNT//NFATC3//NFATC4//ARID4A//TAF4B//TAF12//RNMT//COPS2//NFAT5//ZBTB7B//POU2F…
GO:0006882	cellular zinc ion homeostasis	Biological process	5	16	583	14742	7.90202	0.000288848	0.0124351	3.53933	SLC30A7//SLC30A8//SLC30A4//AP3D1//SLC39A14
GO:0055069	zinc ion homeostasis	Biological process	5	16	583	14742	7.90202	0.000288848	0.0124351	3.53933	SLC39A14//SLC30A8//SLC30A7//SLC30A4//AP3D1
GO:0006139	nucleobase-containing compound metabolic process	Biological process	236	4970	583	14742	1.20072	0.000291843	0.0124383	3.53485	SIRT1//MRE11A//ORC4//TOP1//CDC7//DBF4//KAT7//RRM2B//REV1//E2F4//NPAT//CUX1//DNMT3A//FOXO3//NR6A1//GLI2//MECP2//NFX1//NOTCH1//RNF2//TBL1X//NR2F2//ZNF148//NRIP1//NCOR1//NCOR2//HEXIM1//ZMYND11//ZHX1//KLF12//KDM6B//RCOR1//ZMYND8//NIPBL//BCOR//MOSPD1//GZF1//LCOR//JDP2//OSR1//ZFP36L1//EIF4E//EDC3//TRA2B//CELF3//FRG1//HNRNPC//HNRNPA3//UBE2V2//RRN3//BMPR2//CCNT2//CEBPD//NR3C1//MAF//MLL//MNT//NFATC3//NFAT…
GO:0072358	cardiovascular system development	Biological process	46	689	583	14742	1.68821	0.000355087	0.0148371	3.44966	EPHB2//EREG//FGF9//MYH9//VAV3//SIRT1//C1GALT1//OVOL2//NAA15//ARHGAP24//CRKL//FOXO1//CHD7//EDNRA//NFATC3//STK4//NRP1//ZFP36L1//QKI//WNT7B//FZD3//NR2F2//BBS5//CDH13//NOTCH1//EGR3//NIPBL//NPY1R//GLI2//MRE11A//NF1//HEXIM1//BCOR//FOXP4//OSR1//COL4A3//PRKCB//HIPK1//CDH2//NRG1//ATG7//ATG5//ITGB3//BASP1//ERRFI1//ITGB8
GO:0072359	circulatory system development	Biological process	46	689	583	14742	1.68821	0.000355087	0.0148371	3.44966	EPHB2//EREG//FGF9//MYH9//VAV3//SIRT1//C1GALT1//OVOL2//NAA15//ARHGAP24//CRKL//FOXO1//CHD7//EDNRA//NFATC3//STK4//NRP1//ZFP36L1//QKI//WNT7B//FZD3//NR2F2//BBS5//CDH13//NOTCH1//EGR3//NIPBL//NPY1R//GLI2//MRE11A//NF1//HEXIM1//BCOR//FOXP4//OSR1//COL4A3//PRKCB//HIPK1//CDH2//NRG1//ATG7//ATG5//ITGB3//BASP1//ERRFI1//ITGB8
GO:0048513	organ development	Biological process	114	2141	583	14742	1.34641	0.000427768	0.0176995	3.36879	FOXO3//SIRT1//NRIP1//EREG//HIPK1//GDNF//HOXA11//NF1//NIPBL//RDH10//ZEB2//OVOL2//GLI2//WFS1//RRM2B//C1GALT1//AQP11//OSR1//FOXF2//NOTCH1//ONECUT2//ATG7//BBS5//DLX5//FGF9//NCOR1//CHD7//NPY1R//STK4//NKX2-2//BCL11B//WNT7B//MAGI2//CRKL//E2F4//STX2//FHL1//PBX1//NRP1//BMPR2//DPYSL2//NR3C1//SLIT1//TCF7//UNC5C//IRS2//SYNJ2//SLC7A11//MDGA1//EDNRA//MRE11A//NFATC3//HEXIM1//BCOR//FOXP4//EGR3//SGCB//FXR1//MKL2/…
GO:0007169	transmembrane receptor protein tyrosine kinase signaling pathway	Biological process	41	598	583	14742	1.73369	0.000434793	0.0176995	3.36172	ADRA2A//EREG//ERRFI1//SNX6//NRG1//ADCY3//CBL//FOXO1//FOXO3//PIK3R1//SOS1//ADAM12//RAB7A//EIF4E//FGF5//FGF9//PIK3R2//IRS2//SHOC2//RAB14//SNCA//NEDD4//ITGB3//PRKCB//NRP1//CDH13//AFAP1L2//SIRT1//IGF2R//GIGYF1//BMPR2//TIAM1//VAV3//ARHGEF3//RTN4R//CHN1//EFNA3//EPHA3//EPHB2//SS18//MPZL1
GO:0048013	ephrin receptor signaling pathway	Biological process	6	26	583	14742	5.83533	0.000436049	0.0176995	3.36046	CHN1//EFNA3//EPHA3//EPHB2//SS18//TIAM1
GO:0040011	locomotion	Biological process	67	1123	583	14742	1.50863	0.000442761	0.0178023	3.35383	GDNF//ZEB2//OVOL2//CELSR3//MARK1//PAFAH1B1//NR2F2//NAV1//MDGA1//EGR3//SDCBP//CD2AP//ABL2//COL4A3//DCC//DLX5//DPYSL2//EPHB2//GLI2//ITGB3//MYH9//NEO1//PLXNA2//SCN1B//SLIT1//SOS1//EZR//ST8SIA4//UNC5C//NRP1//RANBP9//PLXNC1//SRGAP1//UNC5D//CHN1//BMPR2//CDH2//EPHA3//CUL3//DGKZ//VAV3//PRPF40A//SCYL3//CTHRC1//NEDD4//LRP8//CELF3//JAG2//MAP3K1//ADRA2A//CDH13//IRS2//ONECUT2//NF1//RAP2B//MAGI2//SCAI//LYST//M…
GO:0010648	negative regulation of cell communication	Biological process	39	563	583	14742	1.75164	0.000489164	0.0193039	3.31055	ERRFI1//SNX6//RAB7A//SCAI//SNCA//NCOR1//FGF9//NR3C1//ONECUT2//PEG10//SIRT1//NOTCH1//SOSTDC1//NEDD4//DDIT4//FOXO1//MAGI2//NF1//CUL3//ADRBK2//MYH9//CBL//ZMYND11//OVOL2//WNT7B//TAOK3//DGKZ//RASAL2//PRKCB//GNAI2//ADRA2A//CDH2//STK4//LATS1//DKK2//CTHRC1//FAM123B//GDNF//MCL1
GO:0023057	negative regulation of signaling	Biological process	39	563	583	14742	1.75164	0.000489164	0.0193039	3.31055	ERRFI1//SNX6//RAB7A//SCAI//SNCA//NCOR1//FGF9//NR3C1//ONECUT2//PEG10//SIRT1//NOTCH1//SOSTDC1//NEDD4//DDIT4//FOXO1//MAGI2//NF1//CUL3//ADRBK2//MYH9//CBL//ZMYND11//OVOL2//WNT7B//TAOK3//DGKZ//RASAL2//PRKCB//GNAI2//ADRA2A//CDH2//STK4//LATS1//DKK2//CTHRC1//FAM123B//GDNF//MCL1
GO:0001944	vasculature development	Biological process	34	469	583	14742	1.83313	0.0005008	0.0195818	3.30034	EPHB2//EREG//FGF9//MYH9//VAV3//SIRT1//C1GALT1//OVOL2//NAA15//ARHGAP24//CRKL//FOXO1//CHD7//EDNRA//NFATC3//STK4//NRP1//ZFP36L1//QKI//NR2F2//CDH13//NOTCH1//EGR3//COL4A3//NF1//WNT7B//PRKCB//HIPK1//CDH2//ITGB3//ERRFI1//ITGB8//OSR1//FZD3
GO:0045935	positive regulation of nucleobase-containing compound metabolic process	Biological process	65	1087	583	14742	1.51207	0.000509016	0.019722	3.29327	NR3C1//ARID1A//ADCY3//EDNRA//NOTCH1//DLX5//FOXF2//FOXO1//FOXO3//GLI2//HOXA11//ILF3//MLL//NPAT//PSMD9//TBL1X//NR2F2//ZNF711//NCOA3//NRIP1//SERTAD2//MED13//MAP3K2//PPARGC1A//PIM2//FOXJ3//ZNF281//KDM3A//OVOL2//NAA15//AFAP1L2//FOXK1//GDF6//AKAP5//TNKS//ARHGEF10//MGMT//SIRT1//EREG//NF1//EN2//GABPB1//GDNF//FOXA1//NFATC3//NKX2-2//PBX1//PITX1//PLAGL2//POU2F1//PPP3CA//SS18//ZNF148//ONECUT2//KLF12//BCL11A/…
GO:0010628	positive regulation of gene expression	Biological process	59	964	583	14742	1.54761	0.000525126	0.0201629	3.27974	NR3C1//ARID1A//NOTCH1//DLX5//FOXF2//FOXO1//FOXO3//GLI2//HOXA11//ILF3//MLL//NPAT//PSMD9//TBL1X//NR2F2//ZNF711//NCOA3//NRIP1//SERTAD2//MED13//MAP3K2//PPARGC1A//PIM2//FOXJ3//ZNF281//KDM3A//OVOL2//NAA15//AFAP1L2//FOXK1//GDF6//CDH13//EN2//GABPB1//GDNF//FOXA1//NFATC3//NKX2-2//PBX1//PITX1//PLAGL2//POU2F1//PPP3CA//SS18//ZNF148//ONECUT2//KLF12//SIRT1//BCL11A//DCAF6//MOSPD1//MKL2//BCL11B//CSRNP3//OSR1//FGF…
GO:0010769	regulation of cell morphogenesis involved in differentiation	Biological process	16	159	583	14742	2.54455	0.000566947	0.0215744	3.24646	EPHA3//NOTCH1//FOXA1//BCL11A//MAP1B//PAFAH1B1//DCC//NEDD4//SLIT1//NRP1//CDH2//CHN1//RTN4R//SSH2//TIAM1//GDNF
GO:0007167	enzyme linked receptor protein signaling pathway	Biological process	51	807	583	14742	1.59803	0.000617686	0.0232971	3.20923	NRG1//MPZL1//BMPR2//ADRA2A//EREG//ERRFI1//SNX6//ADCY3//CBL//FOXO1//FOXO3//PIK3R1//SOS1//ADAM12//RAB7A//MAP3K1//UBE2D1//PTPRD//EIF4E//FGF5//FGF9//PIK3R2//IRS2//SHOC2//RAB14//SNCA//GDF6//NR3C1//ONECUT2//PEG10//SIRT1//NOTCH1//SOSTDC1//NEDD4//ITGB3//PRKCB//MAGI2//NRP1//CDH13//AFAP1L2//IGF2R//GIGYF1//TIAM1//VAV3//ARHGEF3//RTN4R//CHN1//EFNA3//EPHA3//EPHB2//SS18
GO:0060429	epithelium development	Biological process	36	513	583	14742	1.77449	0.000631365	0.0236042	3.19972	EDNRA//NFATC3//STK4//NRP1//GDNF//HOXA11//PBX1//GZF1//FZD3//OVOL2//ZEB2//BBS5//GLI2//E2F4//ONECUT2//BCL11B//MAGI2//JAG2//WNT7B//EREG//DLX5//STX2//EZR//OSR1//FOXF2//NOTCH1//ERRFI1//NCOA3//CTHRC1//BASP1//RDH10//FOXA1//NR3C1//MGMT//NR2F2//PDE4D
GO:0035295	tube development	Biological process	29	383	583	14742	1.91464	0.000643031	0.0238313	3.19177	EDNRA//NFATC3//STK4//NRP1//GDNF//OSR1//HOXA11//PBX1//GZF1//OVOL2//FZD3//ZEB2//BBS5//CUX1//GLI2//NR3C1//FOXA1//NOTCH1//WNT7B//BMPR2//ERRFI1//CHD7//RDH10//FGF9//EDA//NCOA3//CTHRC1//BASP1//ITGB3
GO:0016568	chromatin modification	Biological process	31	420	583	14742	1.86638	0.000650675	0.0239067	3.18664	BCOR//FOXA1//SMARCD2//ARID1A//BAZ1A//PBRM1//NR3C1//SIRT1//DNMT3A//NCOA3//RNF2//KDM6B//NCOR1//NIPBL//KDM3A//PPARGC1A//SNCA//PRKCB//TAF12//WDR5//KAT7//MLL//SETD1B//WDR82//RCOR1//CHD5//CECR2//UBN1//CHD7//CHD9//AEBP2
GO:0051130	positive regulation of cellular component organization	Biological process	30	403	583	14742	1.88237	0.000689144	0.0251037	3.16169	MAGI2//LMAN1//NOTCH1//ABL2//DCC//EPHA3//BCL11A//MAP3K1//NCOR1//NIPBL//MAP1B//TNKS//PPARGC1A//PAFAH1B1//AMPH//SNCA//CLIP3//EREG//CBL//LDLRAP1//SGIP1//TIAM1//ARHGEF10//PPM1E//SHANK3//EPHB2//NLGN3//GDNF//PIK3R1//WNK3
GO:0035239	tube morphogenesis	Biological process	22	261	583	14742	2.13142	0.000705741	0.0254904	3.15135	EDNRA//NFATC3//STK4//NRP1//GDNF//HOXA11//PBX1//GZF1//OVOL2//FZD3//ZEB2//BBS5//CHD7//GLI2//NOTCH1//RDH10//FOXA1//NR3C1//EDA//NCOA3//OSR1//CTHRC1
GO:0051179	localization	Biological process	198	4126	583	14742	1.21346	0.000740886	0.0262191	3.13025	PAFAH1B1//CUX1//GLUL//SLC38A1//GDNF//ZEB2//OVOL2//CELSR3//MARK1//NR2F2//NAV1//MDGA1//EDNRA//SNCA//EGR3//MAGI2//CALU//GAS6//ITGB3//SLC6A6//TWF1//STX2//LMAN1//AP3D1//VAMP3//SEC24D//ACTR1A//SEC24A//TRAPPC8//AP3M1//TRAPPC3//CECR2//SAR1B//RAB14//FGF9//PPP3CA//IPO7//VAV3//EIF4E//YWHAG//AKAP5//XPO7//SDCBP//SEC62//NEDD4//NAGPA//TOMM70A//TOMM40//GABRA1//GJB1//MYO5A//SLC4A4//QKI//ABCC5//LDLRAP1//FLVCR1//ER…
GO:0060070	canonical Wnt receptor signaling pathway	Biological process	16	163	583	14742	2.48211	0.00074432	0.0262191	3.12824	FAM123B//CDH2//NOTCH1//STK4//LATS1//DKK2//CTHRC1//DLX5//EDA//FGF9//TNKS//UBR5//TBL1X//TCF7//WNT7B//FZD3
GO:0050877	neurological system process	Biological process	67	1145	583	14742	1.47964	0.000745484	0.0262191	3.12756	GLUL//SLC38A1//SNCA//NLGN3//ABAT//ADCY3//AMPH//DLG2//GABRA1//GNAI2//GRIA2//GRM3//HTR1F//KCNA6//MYO5A//NOVA1//NPY1R//PAFAH1B1//PLCB3//PRKCB//SCN1B//SDCBP//BSN//HOMER1//AKAP5//KCNK10//SLC38A2//GNG12//GRIP2//SYT2//RAB14//LIN7C//KIF1B//EGR3//RPE65//TIMP3//WFS1//BBS5//RDH10//COL4A3//TBL1X//NIPBL//SOBP//CHD7//CTNND2//NETO1//PDE5A//PJA2//NF1//ZDHHC15//SCN1A//EDNRA//ARHGEF10//CDH2//USP46//SCN2A//QKI//YWH…
GO:0044267	cellular protein metabolic process	Biological process	149	2974	583	14742	1.26687	0.000759475	0.0262191	3.11949	ERO1L//CCNT2//GNAI2//MAP3K1//MAP3K2//NOD2//TAB3//PSMB2//PSMD9//UBE2D1//UBE2V2//TNKS//UBR5//CHFR//NEDD4//HERC3//BCOR//EDNRA//ITGB3//SIRT1//CLIP3//PELI2//LMAN1//NKTR//PPID//ST13//DNAJC16//EDEM3//ADRA2A//EREG//ERRFI1//SNX6//CBL//CUL3//PJA2//MARCH6//FBXW2//DCAF6//MARCH4//KCTD10//EIF4E//EIF4G2//MRPS25//ZFP36L1//FOXO3//QKI//TNRC6A//TNRC6C//CPEB2//EIF2C4//ABL2//ST8SIA4//ATG7//NAGPA//ADRBK2//EPHB2//GMFB/…
GO:0000122	negative regulation of transcription from RNA polymerase II promoter	Biological process	31	424	583	14742	1.84877	0.000761053	0.0262191	3.11859	NEDD4//NCOR1//NCOR2//CUX1//DNMT3A//FOXO3//NR6A1//GLI2//MECP2//NFX1//NOTCH1//RNF2//TBL1X//NR2F2//ZNF148//NRIP1//HEXIM1//ZMYND11//ZHX1//KLF12//KDM6B//RCOR1//SIRT1//ZMYND8//NIPBL//BCOR//MOSPD1//GZF1//LCOR//JDP2//OSR1
GO:0016477	cell migration	Biological process	47	734	583	14742	1.61916	0.000762826	0.0262191	3.11757	GDNF//ZEB2//OVOL2//CELSR3//MARK1//PAFAH1B1//NR2F2//NAV1//MDGA1//EGR3//SDCBP//CD2AP//BMPR2//ITGB3//NRP1//LRP8//PLXNA2//SLIT1//JAG2//MAP3K1//UNC5C//ADRA2A//CDH13//IRS2//ONECUT2//NF1//RAP2B//MAGI2//SCAI//LYST//MYH9//CD47//GAS6//PIK3R1//PIK3R2//SOS1//SLC7A11//EDNRA//CDH2//EPHA3//CUL3//DGKZ//VAV3//PRPF40A//SCYL3//SRGAP1//CTHRC1
GO:0043583	ear development	Biological process	15	148	583	14742	2.56282	0.000774388	0.0263971	3.11104	JAG2//NOTCH1//NIPBL//DLX5//EPHB2//FGF9//FZD3//SOBP//CHD7//OSR1//CUX1//ATG5//CTHRC1//GLI2//RDH10
GO:0023056	positive regulation of signaling	Biological process	44	675	583	14742	1.6483	0.000780393	0.0263971	3.10769	SNCA//VAMP3//ADRA2A//EREG//LANCL2//HOMER1//LDLRAP1//AKAP5//BMPR2//GDF6//CBL//NEDD4//ZEB2//NOTCH1//FGF9//ITGB3//PRKCB//MID1//TAOK3//NOD2//FOXA1//NCOA3//PELI1//EDA//PIM2//ZDHHC17//PELI2//MIER1//CDH2//AFAP1L2//SDCBP//WNT7B//SHOC2//SIRT1//CDH13//SHANK3//DCC//EDNRA//GAS6//DLX5//TNKS//DKK2//UBR5//FAM123B
GO:0006888	ER to Golgi vesicle-mediated transport	Biological process	8	51	583	14742	3.9665	0.000808104	0.0271192	3.09253	SEC24D//SEC24A//SAR1B//LMAN1//SPAST//GOSR2//TRAPPC8//TRAPPC3
GO:0050793	regulation of developmental process	Biological process	71	1235	583	14742	1.45371	0.000838869	0.0279317	3.07631	GDNF//HOXA11//NOTCH1//MAGI2//NF1//GNA12//MYH9//EZR//PRPF40A//PALM2//BRWD3//EPHA3//FOXA1//ITGB3//ABL2//DCC//BCL11A//PAFAH1B1//SEPT7//COL4A3//ZCCHC11//GLI2//FMNL2//NBR1//TXLNG//BMPR2//OSR1//BCOR//CDH2//FLT3LG//EDNRA//SIRT1//ERRFI1//OVOL2//NCOA3//PURB//FOXO3//RCOR1//DPYSL2//YWHAG//NKX2-2//PBX1//MAP1B//GDF6//DLX5//WNT7B//PRKCB//HIPK1//MKL2//NIPBL//SHANK3//FGF9//NEDD4//SLIT1//NRP1//CHN1//RTN4R//SSH2//…
GO:0001822	kidney development	Biological process	17	181	583	14742	2.37497	0.000850556	0.0281013	3.0703	GDNF//HOXA11//NF1//NIPBL//RDH10//OSR1//WNT7B//COL4A3//NID1//MAGI2//BASP1//EDNRA//GLI2//WFS1//RRM2B//C1GALT1//AQP11
GO:0001568	blood vessel development	Biological process	32	446	583	14742	1.81427	0.000863574	0.0283119	3.0637	EPHB2//EREG//FGF9//MYH9//VAV3//SIRT1//C1GALT1//OVOL2//NAA15//ARHGAP24//EDNRA//NFATC3//STK4//NRP1//ZFP36L1//QKI//CDH13//NOTCH1//EGR3//COL4A3//NF1//WNT7B//PRKCB//HIPK1//CDH2//NR2F2//CHD7//ITGB3//ITGB8//OSR1//CRKL//FOXO1
GO:0051173	positive regulation of nitrogen compound metabolic process	Biological process	65	1110	583	14742	1.48074	0.000879221	0.0286049	3.0559	NR3C1//ARID1A//ADCY3//EDNRA//NOTCH1//DLX5//FOXF2//FOXO1//FOXO3//GLI2//HOXA11//ILF3//MLL//NPAT//PSMD9//TBL1X//NR2F2//ZNF711//NCOA3//NRIP1//SERTAD2//MED13//MAP3K2//PPARGC1A//PIM2//FOXJ3//ZNF281//KDM3A//OVOL2//NAA15//AFAP1L2//FOXK1//GDF6//AKAP5//TNKS//ARHGEF10//MGMT//SIRT1//EREG//NF1//EN2//GABPB1//GDNF//FOXA1//NFATC3//NKX2-2//PBX1//PITX1//PLAGL2//POU2F1//PPP3CA//SS18//ZNF148//ONECUT2//KLF12//BCL11A/…
GO:0035162	embryonic hemopoiesis	Biological process	5	20	583	14742	6.32161	0.000899082	0.0288324	3.0462	STK4//FLT3LG//MLL//PBX1//SH2B3
GO:0009888	tissue development	Biological process	65	1111	583	14742	1.47941	0.000899743	0.0288324	3.04588	EDNRA//NFATC3//STK4//NRP1//GDNF//HOXA11//PBX1//GZF1//BMPR2//FZD3//ZEB2//OVOL2//FOXF2//BBS5//GLI2//FGF9//OSR1//E2F4//ONECUT2//BCL11B//MAGI2//EDA//STX2//ZBTB7B//NOTCH1//NF1//NR2F2//MYH9//ADAM12//CACNA2D2//EPHA3//FOXA1//NRG1//RDH10//PITX1//JAG2//WNT7B//EREG//MINPP1//NBR1//TXLNG//BCOR//DLX5//EZR//TIMP3//MYO5A//MREG//ERRFI1//NCOA3//MKL2//PPP3CA//ATG7//ATG5//CTHRC1//BASP1//NR3C1//MGMT//PDE4D//FOXN3//FO…
GO:0002009	morphogenesis of an epithelium	Biological process	24	302	583	14742	2.00952	0.000948834	0.0301786	3.02281	EDNRA//NFATC3//STK4//NRP1//GDNF//HOXA11//PBX1//GZF1//FZD3//OVOL2//ZEB2//BBS5//MAGI2//JAG2//WNT7B//FOXF2//CTHRC1//RDH10//FOXA1//GLI2//NR3C1//NOTCH1//NCOA3//OSR1
GO:0043543	protein acylation	Biological process	14	136	583	14742	2.60302	0.000984339	0.031076	3.00686	NAA15//NMT2//NCOA3//CLIP3//ZDHHC17//ZDHHC15//SIRT1//ESCO1//PPARGC1A//SNCA//TAF12//WDR5//KAT7//MLL
GO:0051254	positive regulation of RNA metabolic process	Biological process	57	950	583	14742	1.51719	0.00104721	0.0328176	2.97997	NR3C1//ARID1A//NOTCH1//DLX5//FOXF2//FOXO1//FOXO3//GLI2//HOXA11//ILF3//MLL//NPAT//PSMD9//TBL1X//NR2F2//ZNF711//NCOA3//NRIP1//SERTAD2//MED13//MAP3K2//PPARGC1A//PIM2//FOXJ3//ZNF281//KDM3A//OVOL2//NAA15//AFAP1L2//FOXK1//GDF6//EN2//GABPB1//GDNF//FOXA1//NFATC3//NKX2-2//PBX1//PITX1//PLAGL2//POU2F1//PPP3CA//SS18//ZNF148//ONECUT2//KLF12//SIRT1//BCL11A//DCAF6//MOSPD1//MKL2//BCL11B//CSRNP3//OSR1//TRA2B//CEL…
GO:0007420	brain development	Biological process	31	433	583	14742	1.81035	0.00107127	0.0333266	2.9701	PAFAH1B1//NCOR1//ATG7//GLI2//FZD3//LRP8//ZEB2//DPYSL2//BCL11B//SHANK3//WNT7B//NF1//PLXNA2//PCSK1//PITX1//GNG12//SLIT1//EPHB2//NOTCH1//NR2F2//EN2//BMPR2//NR3C1//NKX2-2//TCF7//UNC5C//IRS2//SYNJ2//SLC7A11//NIPBL//MDGA1
GO:0007411	axon guidance	Biological process	26	341	583	14742	1.928	0.00108875	0.033605	2.96307	CHN1//SLIT1//NRP1//EPHB2//FZD3//ABL2//COL4A3//DCC//DLX5//DPYSL2//GDNF//GLI2//ITGB3//MYH9//NEO1//PLXNA2//SCN1B//SDCBP//SOS1//EZR//ST8SIA4//UNC5C//RANBP9//PLXNC1//SRGAP1//UNC5D
GO:0006996	organelle organization	Biological process	101	1904	583	14742	1.34135	0.00109666	0.033605	2.95993	ATG5//CUL3//PAFAH1B1//MYH9//MARK1//MID1//SS18//BCOR//LATS1//MAP1B//SPAST//NAV1//H1F0//EZR//TWF1//ADRA2A//RND3//NF1//PFN2//SDCBP//TNXB//CORO2A//PARVA//SSH2//FMNL2//DPYSL2//SGCB//CECR2//PRPF40A//BRWD3//VAV3//RRM2B//ARID1A//SMARCD2//FOXA1//BAZ1A//PBRM1//NR3C1//SIRT1//DNMT3A//TOMM70A//TOMM40//MRE11A//PPARGC1A//SNCA//RANBP9//LMAN1//COG2//FAM109A//NAGPA//TNKS//NIPBL//SEPT7//PPP1R12A//CD2AP//EML4//CHFR/…
GO:0044237	cellular metabolic process	Biological process	361	8211	583	14742	1.11173	0.00110706	0.033605	2.95583	ERO1L//SIRT1//MRE11A//ATG5//ORC4//TOP1//CDC7//DBF4//KAT7//RRM2B//REV1//CCNT2//E2F4//NPAT//AHCY//CUX1//DNMT3A//FOXO3//NR6A1//GLI2//MECP2//NFX1//NOTCH1//RNF2//TBL1X//NR2F2//ZNF148//NRIP1//NCOR1//NCOR2//HEXIM1//ZMYND11//ZHX1//KLF12//KDM6B//RCOR1//ZMYND8//NIPBL//BCOR//MOSPD1//GZF1//LCOR//JDP2//OSR1//GNAI2//MAP3K1//MAP3K2//NOD2//TAB3//PSMB2//PSMD9//UBE2D1//UBE2V2//TNKS//UBR5//CHFR//NEDD4//HERC3//ZFP36…
GO:0048598	embryonic morphogenesis	Biological process	31	434	583	14742	1.80617	0.00111176	0.033605	2.95399	RNF2//BMPR2//CUL3//STK4//OVOL2//FZD3//ZEB2//BBS5//HOXA11//JAG2//WNT7B//GLI2//DLX5//FGF9//PBX1//POU2F1//OSR1//RDH10//AFF3//NOTCH1//PITX1//CHD7//NIPBL//EPHB2//SOBP//GNA12//FLVCR1//LMBR1//FOXP4//GDNF//CTHRC1
GO:0010647	positive regulation of cell communication	Biological process	43	669	583	14742	1.62529	0.00117866	0.0353568	2.92861	ADRA2A//EREG//LANCL2//HOMER1//LDLRAP1//AKAP5//BMPR2//GDF6//CBL//NEDD4//SIRT1//ZEB2//NOTCH1//FGF9//ITGB3//PRKCB//MID1//TAOK3//NOD2//FOXA1//NCOA3//PELI1//EDA//PIM2//ZDHHC17//PELI2//MIER1//CDH2//AFAP1L2//SDCBP//WNT7B//SHOC2//CDH13//SHANK3//SNCA//DCC//EDNRA//GAS6//DLX5//TNKS//DKK2//UBR5//FAM123B
GO:0050770	regulation of axonogenesis	Biological process	11	94	583	14742	2.95905	0.0011863	0.0353568	2.9258	BCL11A//MAP1B//PAFAH1B1//DCC//SLIT1//NRP1//RTN4R//TIAM1//CDH2//CHN1//SSH2
GO:0048870	cell motility	Biological process	49	791	583	14742	1.56642	0.00120948	0.0354367	2.9174	GDNF//ZEB2//OVOL2//CELSR3//MARK1//PAFAH1B1//NR2F2//NAV1//MDGA1//EGR3//SDCBP//CD2AP//BMPR2//ITGB3//NRP1//CDH2//EPHA3//CUL3//DGKZ//VAV3//PRPF40A//SCYL3//SRGAP1//CTHRC1//LRP8//PLXNA2//SLIT1//CELF3//JAG2//MAP3K1//UNC5C//ADRA2A//CDH13//IRS2//ONECUT2//NF1//RAP2B//MAGI2//SCAI//LYST//MYH9//CD47//GAS6//PIK3R1//PIK3R2//SOS1//SLC7A11//EDNRA//ABL2
GO:0051674	localization of cell	Biological process	49	791	583	14742	1.56642	0.00120948	0.0354367	2.9174	GDNF//ZEB2//OVOL2//CELSR3//MARK1//PAFAH1B1//NR2F2//NAV1//MDGA1//EGR3//SDCBP//CD2AP//BMPR2//ITGB3//NRP1//CDH2//EPHA3//CUL3//DGKZ//VAV3//PRPF40A//SCYL3//SRGAP1//CTHRC1//LRP8//PLXNA2//SLIT1//CELF3//JAG2//MAP3K1//UNC5C//ADRA2A//CDH13//IRS2//ONECUT2//NF1//RAP2B//MAGI2//SCAI//LYST//MYH9//CD47//GAS6//PIK3R1//PIK3R2//SOS1//SLC7A11//EDNRA//ABL2
GO:0016055	Wnt receptor signaling pathway	Biological process	22	272	583	14742	2.04523	0.00121393	0.0354367	2.91581	MAGI2//ZEB2//FGF9//TBL1X//TCF7//WNT7B//FZD3//CTHRC1//FAM123B//CDH2//NOTCH1//STK4//LATS1//DKK2//DLX5//EDA//TNKS//UBR5//MARK1//CUL3//SOSTDC1//CSNK1G1
GO:0050767	regulation of neurogenesis	Biological process	26	344	583	14742	1.91119	0.00123485	0.0358022	2.90839	NOTCH1//NF1//ABL2//DCC//EPHA3//BCL11A//PAFAH1B1//DPYSL2//YWHAG//NKX2-2//PBX1//GLI2//FOXA1//MAP1B//GDF6//SHANK3//NEDD4//SLIT1//NRP1//WNT7B//CDH2//CHN1//RTN4R//SSH2//TIAM1//PLAG1
GO:0051960	regulation of nervous system development	Biological process	28	381	583	14742	1.85832	0.00124718	0.0359155	2.90407	NOTCH1//NF1//ABL2//DCC//EPHA3//BCL11A//PAFAH1B1//GLI2//CDH2//DPYSL2//YWHAG//NKX2-2//PBX1//FOXA1//MAP1B//GDF6//SHANK3//NEDD4//SLIT1//NRP1//WNT7B//CHN1//RTN4R//SSH2//TIAM1//EPHB2//NLGN3//PLAG1
GO:0071842	cellular component organization at cellular level	Biological process	147	2963	583	14742	1.25451	0.00126996	0.036326	2.89621	ATG5//CUL3//PAFAH1B1//MYH9//MARK1//MID1//SS18//BCOR//LATS1//MAP1B//SPAST//NAV1//H1F0//EZR//TWF1//ADRA2A//RND3//NF1//PFN2//SDCBP//TNXB//CORO2A//PARVA//SSH2//FMNL2//DPYSL2//SGCB//CECR2//PRPF40A//BRWD3//VAV3//RRM2B//ARID1A//SMARCD2//FOXA1//BAZ1A//PBRM1//NR3C1//SIRT1//DNMT3A//TOMM70A//TOMM40//CD2AP//ATG7//MRE11A//PPARGC1A//SNCA//RANBP9//LMAN1//COG2//FAM109A//NAGPA//ITGB3//TNKS//NIPBL//SEPT7//PPP1R12A…
GO:0072001	renal system development	Biological process	17	188	583	14742	2.28654	0.00129517	0.0368001	2.88767	GDNF//HOXA11//NF1//NIPBL//RDH10//GLI2//WFS1//RRM2B//C1GALT1//AQP11//OSR1//WNT7B//COL4A3//NID1//MAGI2//BASP1//EDNRA
GO:0010467	gene expression	Biological process	195	4101	583	14742	1.20235	0.00134842	0.0380594	2.87017	E2F4//NPAT//CUX1//DNMT3A//FOXO3//NR6A1//GLI2//MECP2//NFX1//NOTCH1//RNF2//TBL1X//NR2F2//ZNF148//NRIP1//NCOR1//NCOR2//HEXIM1//ZMYND11//ZHX1//KLF12//KDM6B//RCOR1//SIRT1//ZMYND8//NIPBL//BCOR//MOSPD1//GZF1//LCOR//JDP2//OSR1//EIF4E//TRA2B//CELF3//FRG1//HNRNPC//HNRNPA3//RRN3//BMPR2//CCNT2//CEBPD//NR3C1//MAF//MLL//MNT//NFATC3//NFATC4//ARID4A//TAF4B//TAF12//RNMT//COPS2//NFAT5//ZBTB7B//POU2F1//MGMT//SIRT5/…
GO:0061097	regulation of protein tyrosine kinase activity	Biological process	7	43	583	14742	4.1164	0.00136154	0.0381769	2.86597	ADRA2A//EREG//ERRFI1//SNX6//NRG1//AFAP1L2//RAP2B
GO:0045893	positive regulation of transcription, DNA-dependent	Biological process	54	899	583	14742	1.51887	0.00138165	0.0384877	2.8596	NR3C1//ARID1A//NOTCH1//DLX5//EN2//FOXF2//FOXO1//FOXO3//GABPB1//GDNF//GLI2//FOXA1//MLL//NFATC3//NKX2-2//PBX1//PITX1//PLAGL2//POU2F1//PPP3CA//SS18//TBL1X//ZNF148//NCOA3//NRIP1//ONECUT2//MED13//PPARGC1A//KLF12//SIRT1//BCL11A//DCAF6//MOSPD1//MKL2//BCL11B//CSRNP3//OSR1//HOXA11//ILF3//NPAT//PSMD9//NR2F2//ZNF711//SERTAD2//MAP3K2//PIM2//FOXJ3//ZNF281//KDM3A//OVOL2//NAA15//AFAP1L2//FOXK1//GDF6
GO:0051568	histone H3-K4 methylation	Biological process	5	22	583	14742	5.74692	0.00143036	0.0395088	2.84456	BCOR//MLL//WDR5//SETD1B//WDR82
GO:0016043	cellular component organization	Biological process	181	3772	583	14742	1.21337	0.00143685	0.0395088	2.84259	ATG5//CUL3//PAFAH1B1//MYH9//MARK1//MID1//SS18//BCOR//LATS1//STK4//MAP1B//SPAST//NAV1//FOXF2//GDNF//MAGI2//BCL11B//H1F0//EZR//TWF1//ADRA2A//RND3//NF1//PFN2//SDCBP//TNXB//CORO2A//PARVA//SSH2//FMNL2//DPYSL2//SGCB//CECR2//PRPF40A//BRWD3//VAV3//RRM2B//ARID1A//SMARCD2//FOXA1//BAZ1A//PBRM1//NR3C1//SIRT1//DNMT3A//MLL//ZNF148//VAMP3//RANBP9//PPARGC1A//CD2AP//TOMM70A//TOMM40//AMPH//LRP8//RAB7A//SNX18//IGF2…
GO:0009967	positive regulation of signal transduction	Biological process	41	637	583	14742	1.62754	0.0014853	0.0405793	2.82818	ADRA2A//EREG//LANCL2//AKAP5//BMPR2//GDF6//CBL//NEDD4//ZEB2//NOTCH1//FGF9//ITGB3//PRKCB//MID1//TAOK3//NOD2//FOXA1//NCOA3//PELI1//EDA//PIM2//ZDHHC17//PELI2//MIER1//CDH2//AFAP1L2//SDCBP//WNT7B//SHOC2//SIRT1//CDH13//DCC//EDNRA//GAS6//DLX5//TNKS//DKK2//UBR5//FAM123B//HOMER1//LDLRAP1
GO:0048583	regulation of response to stimulus	Biological process	108	2080	583	14742	1.31295	0.00150804	0.0409378	2.82159	MAP3K2//NOD2//TAB3//TAP2//MAP3K1//MAP2K4//PELI2//PELI1//PDE5A//SIRT1//ADRA2A//EREG//ERRFI1//SNX6//UBE2V2//RAB7A//WNT7B//RIC8B//GLI2//LANCL2//YWHAG//SPRY3//SPRED3//HOMER1//LDLRAP1//SCAI//SNCA//PJA2//AKAP5//HIPK1//BMPR2//GDF6//NCOR1//CBL//NEDD4//PIK3R1//PIK3R2//ZEB2//FGF9//NR3C1//ONECUT2//PEG10//NOTCH1//SOSTDC1//ITGB3//PRKCB//MYO5A//ZCCHC11//DDIT4//IQSEC2//ASAP1//CHN1//NF1//EPHA3//PAFAH1B1//RASAL2/…
GO:0002064	epithelial cell development	Biological process	9	69	583	14742	3.29823	0.00151764	0.0409378	2.81883	BCL11B//WNT7B//BASP1//FOXA1//PDE4D//MAGI2//GDNF//E2F4//ONECUT2
GO:0090304	nucleic acid metabolic process	Biological process	198	4183	583	14742	1.19692	0.00152795	0.0409568	2.81589	SIRT1//MRE11A//ORC4//TOP1//CDC7//DBF4//KAT7//RRM2B//REV1//E2F4//NPAT//CUX1//DNMT3A//FOXO3//NR6A1//GLI2//MECP2//NFX1//NOTCH1//RNF2//TBL1X//NR2F2//ZNF148//NRIP1//NCOR1//NCOR2//HEXIM1//ZMYND11//ZHX1//KLF12//KDM6B//RCOR1//ZMYND8//NIPBL//BCOR//MOSPD1//GZF1//LCOR//JDP2//OSR1//ZFP36L1//EIF4E//EDC3//TRA2B//CELF3//FRG1//HNRNPC//HNRNPA3//UBE2V2//RRN3//BMPR2//CCNT2//CEBPD//NR3C1//MAF//MLL//MNT//NFATC3//NFAT…
GO:0060828	regulation of canonical Wnt receptor signaling pathway	Biological process	12	112	583	14742	2.70926	0.0015713	0.0418556	2.80374	CDH2//NOTCH1//STK4//LATS1//DKK2//CTHRC1//FAM123B//DLX5//EDA//FGF9//TNKS//UBR5
GO:0060485	mesenchyme development	Biological process	14	143	583	14742	2.4756	0.00160018	0.0423602	2.79583	GDNF//ZEB2//OVOL2//FOXF2//EPHA3//NOTCH1//FOXA1//EDNRA//NRG1//RDH10//FGF9//WNT7B//BASP1//OSR1
GO:0030518	intracellular steroid hormone receptor signaling pathway	Biological process	11	98	583	14742	2.83827	0.00167081	0.0438218	2.77707	ARID1A//NCOA3//NRIP1//MED13//PPARGC1A//KDM3A//FOXA1//NR3C1//NEDD4//UBR5//SIRT1
GO:0034641	cellular nitrogen compound metabolic process	Biological process	247	5381	583	14742	1.1607	0.00167596	0.0438218	2.77574	SIRT1//MRE11A//ORC4//TOP1//CDC7//DBF4//KAT7//RRM2B//REV1//E2F4//NPAT//AHCY//CUX1//DNMT3A//FOXO3//NR6A1//GLI2//MECP2//NFX1//NOTCH1//RNF2//TBL1X//NR2F2//ZNF148//NRIP1//NCOR1//NCOR2//HEXIM1//ZMYND11//ZHX1//KLF12//KDM6B//RCOR1//ZMYND8//NIPBL//BCOR//MOSPD1//GZF1//LCOR//JDP2//OSR1//ZFP36L1//EIF4E//EDC3//TRA2B//CELF3//FRG1//HNRNPC//HNRNPA3//UBE2V2//RRN3//BMPR2//CCNT2//CEBPD//NR3C1//MAF//MLL//MNT//NFATC3…
GO:0043584	nose development	Biological process	4	14	583	14742	7.2247	0.00176496	0.0458673	2.75327	POU2F1//DLX5//CHD7//RDH10
GO:0060284	regulation of cell development	Biological process	30	428	583	14742	1.77241	0.00177698	0.0458999	2.75032	NOTCH1//NF1//EPHA3//FOXA1//HOXA11//ABL2//DCC//BCL11A//PAFAH1B1//DPYSL2//YWHAG//NKX2-2//PBX1//GLI2//MAP1B//GDF6//SHANK3//NEDD4//SLIT1//NRP1//WNT7B//CDH2//CHN1//RTN4R//SSH2//TIAM1//PLAG1//PDE3A//PDE5A//GDNF
GO:0090263	positive regulation of canonical Wnt receptor signaling pathway	Biological process	7	45	583	14742	3.93345	0.00179111	0.0459862	2.74688	DLX5//EDA//FGF9//TNKS//DKK2//UBR5//FAM123B
GO:0007266	Rho protein signal transduction	Biological process	17	194	583	14742	2.21582	0.00181981	0.0461789	2.73997	CDH2//SOS1//TIAM1//ARHGEF10//VAV3//ARHGEF3//CUL3//SCAI//ADRA2A//CDH13//EDNRA//GNA12//SRGAP1
GO:0060541	respiratory system development	Biological process	15	161	583	14742	2.35588	0.00182029	0.0461789	2.73986	CUX1//GLI2//NR3C1//FOXA1//NOTCH1//WNT7B//POU2F1//CHD7//RDH10//BMPR2//ERRFI1//DLX5//FGF9//BASP1//EDA
GO:0045664	regulation of neuron differentiation	Biological process	22	283	583	14742	1.96573	0.00200914	0.0506683	2.69699	ABL2//DCC//EPHA3//BCL11A//PAFAH1B1//NKX2-2//PBX1//GLI2//FOXA1//MAP1B//GDF6//NOTCH1//NEDD4//SLIT1//NRP1//CDH2//CHN1//RTN4R//SSH2//TIAM1//DPYSL2//YWHAG
GO:0048514	blood vessel morphogenesis	Biological process	28	394	583	14742	1.79701	0.0020441	0.0512467	2.6895	EPHB2//EREG//FGF9//MYH9//VAV3//SIRT1//C1GALT1//OVOL2//NAA15//ARHGAP24//EDNRA//NFATC3//STK4//NRP1//ZFP36L1//QKI//CDH13//NOTCH1//EGR3//COL4A3//NF1//WNT7B//PRKCB//HIPK1//CHD7//ITGB3//CDH2//NR2F2
GO:0006829	zinc ion transport	Biological process	5	24	583	14742	5.26801	0.00216267	0.0539022	2.66501	SLC30A4//SLC39A14//SLC30A8//SLC30A9//SLC30A7
GO:0065008	regulation of biological quality	Biological process	116	2286	583	14742	1.28313	0.00220612	0.0546656	2.65637	GLUL//SLC38A1//PPARGC1A//EPHA3//SIRT1//SNCA//PDE5A//RDH10//BMPR2//WFS1//SCN1B//TWF1//ADRA2A//DAGLA//CALU//CD47//DGKG//GAS6//GNA12//GNAI2//ITGB3//LMAN1//PDE3A//PIK3R1//PIK3R2//PRKCB//SOS1//LRP8//DGKZ//SH2B3//MRVI1//VAV3//RCOR1//SLC7A11//AK3//ZFYVE20//PDIA4//DNAJC16//TMX3//STIM2//FLVCR1//SLC39A14//SLC30A8//E2F4//SLC9A4//MRE11A//EZR//EDNRA//ABAT//RAB14//SLC38A2//LIN7C//SYT2//SLC29A2//SLC30A4//PCSK1/…
GO:0022603	regulation of anatomical structure morphogenesis	Biological process	34	512	583	14742	1.67918	0.00223058	0.0549521	2.65158	GDNF//HOXA11//NOTCH1//MAGI2//GNA12//MYH9//EZR//PRPF40A//PALM2//BRWD3//EPHA3//FOXA1//SEPT7//COL4A3//NF1//FMNL2//BCL11A//EDNRA//PRKCB//HIPK1//MAP1B//PAFAH1B1//DCC//NEDD4//SLIT1//NRP1//CDH2//CHN1//RTN4R//SSH2//TIAM1//CTHRC1//BCOR//OSR1
GO:0007413	axonal fasciculation	Biological process	4	15	583	14742	6.74305	0.00233213	0.0571238	2.63225	EPHA3//CELSR3//EPHB2//NRP1
GO:0071840	cellular component organization or biogenesis	Biological process	184	3883	583	14742	1.19822	0.0023492	0.0571606	2.62908	ATG5//CUL3//PAFAH1B1//MYH9//MARK1//MID1//SS18//BCOR//LATS1//STK4//MAP1B//SPAST//NAV1//FOXF2//GDNF//MAGI2//BCL11B//H1F0//EZR//TWF1//ADRA2A//RND3//NF1//PFN2//SDCBP//TNXB//CORO2A//PARVA//SSH2//FMNL2//DPYSL2//SGCB//CECR2//PRPF40A//BRWD3//VAV3//RRM2B//ARID1A//SMARCD2//FOXA1//BAZ1A//PBRM1//NR3C1//SIRT1//DNMT3A//FRG1//UTP14C//MLL//ZNF148//VAMP3//RANBP9//PPARGC1A//CD2AP//TOMM70A//TOMM40//AMPH//LRP8//RAB7…
GO:0010557	positive regulation of macromolecule biosynthetic process	Biological process	59	1027	583	14742	1.45268	0.00236046	0.0571606	2.627	NR3C1//ARID1A//NOTCH1//DLX5//FOXF2//FOXO1//FOXO3//GLI2//HOXA11//ILF3//MLL//NPAT//PSMD9//TBL1X//NR2F2//ZNF711//NCOA3//NRIP1//SERTAD2//MED13//MAP3K2//PPARGC1A//PIM2//FOXJ3//ZNF281//KDM3A//OVOL2//NAA15//AFAP1L2//FOXK1//GDF6//TNKS//EREG//SOAT1//SIRT1//IRS2//EN2//GABPB1//GDNF//FOXA1//NFATC3//NKX2-2//PBX1//PITX1//PLAGL2//POU2F1//PPP3CA//SS18//ZNF148//ONECUT2//KLF12//BCL11A//DCAF6//MOSPD1//MKL2//BCL11B/…
GO:0071841	cellular component organization or biogenesis at cellular level	Biological process	149	3061	583	14742	1.23087	0.00255936	0.0616271	2.59187	ATG5//CUL3//PAFAH1B1//MYH9//MARK1//MID1//SS18//BCOR//LATS1//MAP1B//SPAST//NAV1//H1F0//EZR//TWF1//ADRA2A//RND3//NF1//PFN2//SDCBP//TNXB//CORO2A//PARVA//SSH2//FMNL2//DPYSL2//SGCB//CECR2//PRPF40A//BRWD3//VAV3//RRM2B//ARID1A//SMARCD2//FOXA1//BAZ1A//PBRM1//NR3C1//SIRT1//DNMT3A//FRG1//UTP14C//TOMM70A//TOMM40//CD2AP//ATG7//MRE11A//PPARGC1A//SNCA//RANBP9//LMAN1//COG2//FAM109A//NAGPA//ITGB3//TNKS//NIPBL//S…
GO:0035116	embryonic hindlimb morphogenesis	Biological process	5	25	583	14742	5.05729	0.00261661	0.0623056	2.58226	AFF3//NOTCH1//PITX1//CHD7//OSR1
GO:0007626	locomotory behavior	Biological process	12	119	583	14742	2.54989	0.00263139	0.0623056	2.57981	SCN1A//ATG7//CHD7//GDNF//PAFAH1B1//SNCA//MYO5A//SHANK3//ABAT//NOVA1//NPY1R//SOBP
GO:0040029	regulation of gene expression, epigenetic	Biological process	12	119	583	14742	2.54989	0.00263139	0.0623056	2.57981	SIRT1//DNMT3A//MGMT//SIRT5//NR3C1//ARID1A//ZCCHC11//LIN28B//MIER1//TNRC6A//EIF2C4//CREBZF
GO:0030177	positive regulation of Wnt receptor signaling pathway	Biological process	8	61	583	14742	3.31626	0.00264615	0.0623089	2.57738	DLX5//EDA//FGF9//TNKS//DKK2//UBR5//FAM123B//ZEB2
GO:0030855	epithelial cell differentiation	Biological process	21	272	583	14742	1.95226	0.00272934	0.0639146	2.56394	E2F4//ONECUT2//BCL11B//WNT7B//EREG//STK4//OSR1//NOTCH1//ERRFI1//OVOL2//NCOA3//BASP1//FOXA1//MGMT//NR2F2//PDE4D//MAGI2//GDNF//DLX5//STX2//EZR
GO:0016192	vesicle-mediated transport	Biological process	52	887	583	14742	1.48241	0.00281239	0.0654996	2.55092	CUX1//MAGI2//CALU//GAS6//ITGB3//VAV3//MYO5A//VAMP3//LIN7C//LMAN1//SPAST//GOSR2//SEC24D//SEC24A//TRAPPC8//TRAPPC3//SAR1B//COG5//COG2//PLCB3//RAB14//AMPH//LRP8//RAB7A//SNX18//IGF2R//LDLRAP1//NLGN3//STX2//ZDHHC15//ZFYVE20//ABL2//CDH13//ADRBK2//NEDD4//SNCA//LYST//VPS54//SNX6//FAM109A//CLIP3//ADRA2A//NOTCH1//CBL//SGIP1//DPYSL2//NRP1//SLC30A8//AP3D1//ACTR1A//AP3M1//CECR2
GO:0048585	negative regulation of response to stimulus	Biological process	40	640	583	14742	1.5804	0.00285753	0.066189	2.54401	ERRFI1//SNX6//RAB7A//SCAI//SNCA//NCOR1//FGF9//NR3C1//ONECUT2//PEG10//SIRT1//NOTCH1//SOSTDC1//NEDD4//DDIT4//FOXO1//MAGI2//NF1//CUL3//ADRBK2//MYH9//CBL//ZMYND11//OVOL2//WNT7B//TAOK3//DGKZ//RASAL2//PRKCB//SLIT1//NRP1//ADRA2A//CDH2//STK4//LATS1//DKK2//CTHRC1//FAM123B//GDNF//MCL1
GO:0007010	cytoskeleton organization	Biological process	44	722	583	14742	1.541	0.00289054	0.0665917	2.53902	PAFAH1B1//MYH9//MARK1//MID1//SS18//MAP1B//SPAST//NAV1//EZR//TWF1//ADRA2A//RND3//NF1//PFN2//SDCBP//TNXB//CORO2A//PARVA//SSH2//FMNL2//RANBP9//TNKS//LATS1//MAP3K1//CNN3//LIMCH1//TRPM7//SNCA//CLIP3//EPHA3//TTLL3//CUL3//NCOR1//PPP1R12A//ARHGEF10//PPM1E//VPS54//SHANK3//ABL2//DPYSL2//SGCB//CECR2//PRPF40A//BRWD3
GO:0007265	Ras protein signal transduction	Biological process	26	366	583	14742	1.79631	0.00292235	0.0669627	2.53427	ADRA2A//CDH13//EDNRA//GNA12//ARHGEF3//SRGAP1//IQSEC2//RAP2B//NF1//CDH2//SOS1//TIAM1//ARHGEF10//VAV3//CUL3//SCAI//SHOC2//DGKZ//RASAL2//CRKL//SDCBP
GO:2000026	regulation of multicellular organismal development	Biological process	55	957	583	14742	1.45324	0.00327097	0.0745501	2.48532	GDNF//HOXA11//NOTCH1//MAGI2//NF1//EPHA3//FOXA1//ABL2//DCC//BCL11A//PAFAH1B1//SEPT7//COL4A3//GLI2//NBR1//TXLNG//BMPR2//OSR1//BCOR//CDH2//FLT3LG//EDNRA//ERRFI1//OVOL2//NCOA3//PURB//FOXO3//RCOR1//DPYSL2//YWHAG//NKX2-2//PBX1//MAP1B//GDF6//PRKCB//HIPK1//MKL2//NIPBL//SHANK3//NEDD4//SLIT1//NRP1//WNT7B//CHN1//RTN4R//SSH2//TIAM1//AP3D1//EPHB2//NLGN3//FGF9//NRG1//CTHRC1//PLAG1//BASP1
GO:0032268	regulation of cellular protein metabolic process	Biological process	64	1150	583	14742	1.40725	0.0032911	0.07461	2.48266	CCNT2//GNAI2//MAP3K1//MAP3K2//NOD2//TAB3//BCOR//EDNRA//ITGB3//SIRT1//CLIP3//PELI2//ADRA2A//EREG//ERRFI1//SNX6//ZFP36L1//EIF4E//FOXO3//QKI//TNRC6A//TNRC6C//CPEB2//EIF2C4//EIF4G2//NF1//YWHAG//PPM1E//WFS1//GOSR2//NRG1//DGKG//DGKZ//WNT7B//WNK3//BMPR2//GDF6//FXR1//NCOR1//NIPBL//ATG7//ATG5//N4BP1//UBE2D1//PELI1//MRE11A//RAP2B//SNCA//LATS1//ADCY3//PPARGC1A//PDE5A//ZEB2//TWF1//NR2F2//HEXIM1//LRP8//NRP1//…
GO:0042476	odontogenesis	Biological process	10	92	583	14742	2.74853	0.00339004	0.0764464	2.46979	EDA//GLI2//JAG2//WNT7B//SOSTDC1//BCL11B//EDNRA//BCOR//MYO5A//OSR1
GO:0048839	inner ear development	Biological process	12	123	583	14742	2.46697	0.00346065	0.0776279	2.46084	JAG2//NOTCH1//DLX5//EPHB2//FGF9//FZD3//SOBP//CHD7//CUX1//ATG5//CTHRC1//GLI2
GO:0070647	protein modification by small protein conjugation or removal	Biological process	32	487	583	14742	1.66153	0.00348503	0.0777654	2.45779	MAP3K1//PSMB2//PSMD9//UBE2D1//UBE2V2//TNKS//UBR5//CHFR//NEDD4//HERC3//CBL//CUL3//PJA2//MARCH6//SIRT1//FBXW2//DCAF6//MARCH4//KCTD10//COPS2//RNF2//USP15//USP46//BCL11A//ATG7//ATG5//N4BP1//WFS1//PELI1//BCOR//YOD1//ZNRF1
GO:0042058	regulation of epidermal growth factor receptor signaling pathway	Biological process	8	64	583	14742	3.16081	0.00358731	0.0792181	2.44523	ADRA2A//EREG//ERRFI1//SNX6//RAB7A//CBL//AFAP1L2//CDH13
GO:0090101	negative regulation of transmembrane receptor protein serine/threonine kinase signaling pathway	Biological process	8	64	583	14742	3.16081	0.00358731	0.0792181	2.44523	NR3C1//ONECUT2//PEG10//SIRT1//SNX6//NOTCH1//SOSTDC1//MAGI2
GO:0046580	negative regulation of Ras protein signal transduction	Biological process	5	27	583	14742	4.68268	0.00372526	0.0814209	2.42884	NF1//CUL3//SCAI//DGKZ//RASAL2
GO:2001257	regulation of cation channel activity	Biological process	5	27	583	14742	4.68268	0.00372526	0.0814209	2.42884	MYO5A//STIM2//ADRA2A//GNAI2//HOMER1
GO:0048646	anatomical structure formation involved in morphogenesis	Biological process	43	712	583	14742	1.52713	0.00378081	0.0822133	2.42242	EPHB2//EREG//FGF9//MYH9//VAV3//SIRT1//C1GALT1//OVOL2//NAA15//ARHGAP24//EDNRA//NFATC3//STK4//NRP1//PAFAH1B1//BMPR2//PLXNA2//ZEB2//GDNF//HOXA11//CUL3//FZD3//CDH13//NOTCH1//EGR3//ADAM12//COL4A3//NF1//GLI2//LRP8//POU2F1//E2F4//ONECUT2//TTLL3//BBS5//PRKCB//HIPK1//ITGB3//RDH10//EDA//OSR1//CTHRC1//DLX5
GO:2000273	positive regulation of receptor activity	Biological process	4	17	583	14742	5.94975	0.00381853	0.0826121	2.4181	ADRA2A//EREG//NCOA3//SHANK3
GO:0065009	regulation of molecular function	Biological process	94	1823	583	14742	1.30385	0.00387681	0.0834494	2.41153	CCNT2//GNAI2//MAP3K1//MAP3K2//NOD2//TAB3//ADRA2A//EREG//ERRFI1//SNX6//NF1//YWHAG//PPM1E//COL4A3//SNCA//WFS1//GOSR2//NRG1//ADCY3//EDNRA//NPY1R//GRM3//DGKG//DGKZ//HOMER1//WNT7B//DLG2//UBN1//CSRNP3//MYO5A//SIRT1//ZCCHC11//CTHRC1//ITGB3//STIM2//ASAP1//CHN1//EPHA3//PAFAH1B1//RASAL2//SOS1//MLL//WNK3//MAGI2//GDNF//CNN3//IRS2//MRE11A//PPP1R12A//NUAK1//NCOA3//GMFB//DBF4//MGMT//TNKS//LDLRAP1//PDE5A//PBX1//…
GO:0007166	cell surface receptor signaling pathway	Biological process	109	2166	583	14742	1.27249	0.00399319	0.0855224	2.39868	GNAI2//NOTCH1//MAGI2//MARK1//TCF7//WNT7B//CUL3//TNKS//SOSTDC1//CSNK1G1//FAM123B//NRG1//MPZL1//BMPR2//ADRA2A//EREG//ERRFI1//SNX6//ADCY3//CBL//FOXO1//FOXO3//PIK3R1//SOS1//ADAM12//RAB7A//MAP3K1//UBE2D1//PTPRD//EDNRA//CELSR3//GNA12//GRM3//PLCB3//ATRNL1//GNG12//HTR1F//NPY1R//FZD3//DGKG//DGKZ//HOMER1//GABRA1//JAG2//GLI2//NKX2-2//CD47//ITGB3//ITGB8//ADAM11//MYH9//VAV3//MAP2K4//PELI2//PELI1//NOD2//TAB3//…
GO:0051969	regulation of transmission of nerve impulse	Biological process	15	175	583	14742	2.16741	0.00406008	0.0865204	2.39146	SNCA//NF1//CDH2//USP46//CTNND2//YWHAG//NETO1//SHANK3//GRM3//PPP3CA//GNAI2//GDNF//MAP1B//CACNA2D2//NLGN3
GO:0006807	nitrogen compound metabolic process	Biological process	248	5488	583	14742	1.14268	0.0040836	0.0865885	2.38896	SIRT1//MRE11A//ORC4//TOP1//CDC7//DBF4//KAT7//RRM2B//REV1//E2F4//NPAT//AHCY//CUX1//DNMT3A//FOXO3//NR6A1//GLI2//MECP2//NFX1//NOTCH1//RNF2//TBL1X//NR2F2//ZNF148//NRIP1//NCOR1//NCOR2//HEXIM1//ZMYND11//ZHX1//KLF12//KDM6B//RCOR1//ZMYND8//NIPBL//BCOR//MOSPD1//GZF1//LCOR//JDP2//OSR1//ZFP36L1//EIF4E//EDC3//TRA2B//CELF3//FRG1//HNRNPC//HNRNPA3//UBE2V2//RRN3//BMPR2//CCNT2//CEBPD//NR3C1//MAF//MLL//MNT//NFATC3…
GO:0009891	positive regulation of biosynthetic process	Biological process	65	1183	583	14742	1.38937	0.00410973	0.0866853	2.38619	NR3C1//ARID1A//ADCY3//EDNRA//NOTCH1//FOXO1//PPARGC1A//DLX5//FOXF2//FOXO3//GLI2//HOXA11//ILF3//MLL//NPAT//PSMD9//TBL1X//NR2F2//ZNF711//NCOA3//NRIP1//SERTAD2//MED13//MAP3K2//PIM2//FOXJ3//ZNF281//KDM3A//OVOL2//NAA15//AFAP1L2//FOXK1//GDF6//AKAP5//TNKS//EREG//SOAT1//SIRT1//IRS2//NF1//EN2//GABPB1//GDNF//FOXA1//NFATC3//NKX2-2//PBX1//PITX1//PLAGL2//POU2F1//PPP3CA//SS18//ZNF148//ONECUT2//KLF12//BCL11A//DC…
GO:0051128	regulation of cellular component organization	Biological process	60	1075	583	14742	1.41134	0.00412884	0.0866853	2.38417	BCOR//MAGI2//TWF1//MAP1B//MID1//UBE2D1//PFN2//SSH2//GNA12//MYH9//EZR//PRPF40A//PALM2//BRWD3//LMAN1//EPHA3//NOTCH1//FOXA1//ABL2//DCC//BCL11A//PAFAH1B1//SEPT7//FMNL2//CDH13//NRG1//BMPR2//FHL1//SERTAD2//SIRT1//NDRG3//FOXK1//LATS1//MAP3K1//NCOR1//NIPBL//SNCA//CLIP3//TNKS//PPARGC1A//AMPH//EREG//CBL//LDLRAP1//SGIP1//NEDD4//SLIT1//NRP1//CDH2//CHN1//RTN4R//TIAM1//ARHGEF10//PPM1E//SHANK3//EPHB2//NLGN3//GD…
GO:0048638	regulation of developmental growth	Biological process	10	95	583	14742	2.66173	0.00427704	0.0893565	2.36886	BCL11A//MAP1B//PAFAH1B1//DCC//SLIT1//NRP1//FGF9//NRG1//BASP1//NIPBL
GO:0044238	primary metabolic process	Biological process	362	8366	583	14742	1.09415	0.00430619	0.0894816	2.36591	ERO1L//SIRT1//MRE11A//ORC4//TOP1//CDC7//DBF4//KAT7//RRM2B//REV1//CCNT2//E2F4//NPAT//AHCY//CUX1//DNMT3A//FOXO3//NR6A1//GLI2//MECP2//NFX1//NOTCH1//RNF2//TBL1X//NR2F2//ZNF148//NRIP1//NCOR1//NCOR2//HEXIM1//ZMYND11//ZHX1//KLF12//KDM6B//RCOR1//ZMYND8//NIPBL//BCOR//MOSPD1//GZF1//LCOR//JDP2//OSR1//GNAI2//MAP3K1//MAP3K2//NOD2//TAB3//PSMB2//PSMD9//UBE2D1//UBE2V2//TNKS//UBR5//CHFR//NEDD4//HERC3//ZFP36L1//EI…
GO:0031328	positive regulation of cellular biosynthetic process	Biological process	64	1164	583	14742	1.39032	0.00433203	0.0894816	2.36331	NR3C1//ARID1A//ADCY3//EDNRA//NOTCH1//FOXO1//PPARGC1A//DLX5//FOXF2//FOXO3//GLI2//HOXA11//ILF3//MLL//NPAT//PSMD9//TBL1X//NR2F2//ZNF711//NCOA3//NRIP1//SERTAD2//MED13//MAP3K2//PIM2//FOXJ3//ZNF281//KDM3A//OVOL2//NAA15//AFAP1L2//FOXK1//GDF6//AKAP5//TNKS//EREG//SOAT1//IRS2//NF1//EN2//GABPB1//GDNF//FOXA1//NFATC3//NKX2-2//PBX1//PITX1//PLAGL2//POU2F1//PPP3CA//SS18//ZNF148//ONECUT2//KLF12//SIRT1//BCL11A//DC…
GO:0021510	spinal cord development	Biological process	8	66	583	14742	3.06502	0.00434601	0.0894816	2.36191	GLI2//NOTCH1//NKX2-2//MDGA2//MDGA1//DPYSL2//NF1//SLIT1
GO:0051058	negative regulation of small GTPase mediated signal transduction	Biological process	5	28	583	14742	4.51544	0.00439008	0.0899543	2.35753	NF1//CUL3//SCAI//DGKZ//RASAL2
GO:0050679	positive regulation of epithelial cell proliferation	Biological process	11	111	583	14742	2.50586	0.00445872	0.0909237	2.35079	BMPR2//CDH13//EGR3//ITGB3//NF1//NRP1//DLX5//FGF9//NOTCH1//NOD2//OSR1
GO:0042733	embryonic digit morphogenesis	Biological process	6	40	583	14742	3.79297	0.00455037	0.0923267	2.34195	GLI2//GNA12//HOXA11//FLVCR1//LMBR1//OSR1
GO:0009887	organ morphogenesis	Biological process	42	699	583	14742	1.51936	0.00457568	0.0923267	2.33954	GDNF//HOXA11//OVOL2//BBS5//DLX5//NIPBL//CHD7//NPY1R//NOTCH1//WNT7B//MAGI2//OSR1//EPHB2//FGF9//FZD3//SOBP//EDA//GLI2//JAG2//SOSTDC1//BCL11B//MYO5A//BCOR//EDNRA//ERRFI1//NF1//RDH10//SLIT1//PAFAH1B1//SHANK3//CTHRC1//POU2F1//FOXA1//BASP1//CRKL//E2F4//STX2//EREG//FHL1//PBX1//NRP1//ONECUT2
GO:0016567	protein ubiquitination	Biological process	27	398	583	14742	1.71541	0.00459251	0.0923267	2.33795	MAP3K1//PSMB2//PSMD9//UBE2D1//UBE2V2//TNKS//UBR5//CHFR//NEDD4//HERC3//RNF2//ATG7//ATG5//N4BP1//WFS1//PELI1//BCOR//MARCH6//ZNRF1//CBL//CUL3//PJA2//SIRT1//FBXW2//DCAF6//MARCH4//KCTD10
GO:0048754	branching morphogenesis of a tube	Biological process	13	144	583	14742	2.2828	0.0046796	0.093636	2.32979	EDNRA//NFATC3//STK4//NRP1//GDNF//HOXA11//PBX1//GZF1//RDH10//FOXA1//NCOA3//GLI2//NOTCH1
GO:0007379	segment specification	Biological process	4	18	583	14742	5.61921	0.00475796	0.0939218	2.32258	GLI2//DLX5//EDNRA//OSR1
GO:0007173	epidermal growth factor receptor signaling pathway	Biological process	14	161	583	14742	2.19882	0.00476	0.0939218	2.32239	ADRA2A//EREG//ERRFI1//SNX6//RAB7A//CDH13//CBL//AFAP1L2//ADCY3//FOXO1//FOXO3//PIK3R1//SOS1//ADAM12
GO:0050804	regulation of synaptic transmission	Biological process	14	161	583	14742	2.19882	0.00476	0.0939218	2.32239	SNCA//NF1//USP46//CTNND2//YWHAG//NETO1//SHANK3//GNAI2//GDNF//MAP1B//CACNA2D2//NLGN3//GRM3//PPP3CA
GO:0019220	regulation of phosphate metabolic process	Biological process	51	891	583	14742	1.44737	0.00493871	0.0965541	2.30639	CCNT2//GNAI2//MAP3K1//MAP3K2//NOD2//TAB3//EDNRA//ITGB3//SIRT1//CLIP3//PELI2//ADRA2A//EREG//ERRFI1//SNX6//NF1//YWHAG//PPM1E//WFS1//GOSR2//NRG1//DGKG//DGKZ//WNT7B//WNK3//BMPR2//GDF6//DLG2//UBN1//CSRNP3//MRE11A//RAP2B//MAGI2//SNCA//LATS1//IRS2//ADCY3//PPP1R12A//NUAK1//SDCBP//PDE5A//ZEB2//TWF1//PIK3R1//VAV3//NR2F2//HEXIM1//LRP8//NRP1//AFAP1L2//STK4
GO:0051174	regulation of phosphorus metabolic process	Biological process	51	891	583	14742	1.44737	0.00493871	0.0965541	2.30639	CCNT2//GNAI2//MAP3K1//MAP3K2//NOD2//TAB3//EDNRA//ITGB3//SIRT1//CLIP3//PELI2//ADRA2A//EREG//ERRFI1//SNX6//NF1//YWHAG//PPM1E//WFS1//GOSR2//NRG1//DGKG//DGKZ//WNT7B//WNK3//BMPR2//GDF6//DLG2//UBN1//CSRNP3//MRE11A//RAP2B//MAGI2//SNCA//LATS1//IRS2//ADCY3//PPP1R12A//NUAK1//SDCBP//PDE5A//ZEB2//TWF1//PIK3R1//VAV3//NR2F2//HEXIM1//LRP8//NRP1//AFAP1L2//STK4
GO:0016458	gene silencing	Biological process	9	82	583	14742	2.77534	0.00499367	0.0971827	2.30158	SIRT1//SIRT5//DNMT3A//ZCCHC11//TNRC6A//TNRC6C//EIF2C4//LIN28B//MIER1
GO:0003001	generation of a signal involved in cell-cell signaling	Biological process	22	306	583	14742	1.81798	0.00515562	0.0994265	2.28772	SNCA//ABAT//RAB14//SLC38A2//LIN7C//SYT2//ADRA2A//PCSK1//CACNA2D2//AKAP5//DPYSL2//NR3C1//NF1//MYO5A//SLC30A8//ILDR2//PSMD9//IRS2//GDNF//PPP3CA//NPY1R//CHD7
GO:0023061	signal release	Biological process	22	306	583	14742	1.81798	0.00515562	0.0994265	2.28772	SNCA//ABAT//RAB14//SLC38A2//LIN7C//SYT2//ADRA2A//PCSK1//CACNA2D2//AKAP5//DPYSL2//NR3C1//NF1//MYO5A//SLC30A8//ILDR2//PSMD9//IRS2//GDNF//PPP3CA//NPY1R//CHD7
GO:0006836	neurotransmitter transport	Biological process	12	130	583	14742	2.33413	0.00541029	0.103868	2.26678	GLUL//SLC38A1//SNCA//ABAT//RAB14//SLC38A2//LIN7C//SYT2//NF1//GDNF//SLC6A6//SV2B
GO:0032446	protein modification by small protein conjugation	Biological process	28	423	583	14742	1.67381	0.00549603	0.105041	2.25995	MAP3K1//PSMB2//PSMD9//UBE2D1//UBE2V2//TNKS//UBR5//CHFR//NEDD4//HERC3//CBL//CUL3//PJA2//MARCH6//SIRT1//FBXW2//DCAF6//MARCH4//KCTD10//RNF2//BCL11A//ATG7//ATG5//N4BP1//WFS1//PELI1//BCOR//ZNRF1
GO:0042471	ear morphogenesis	Biological process	10	99	583	14742	2.55419	0.00573356	0.109027	2.24158	DLX5//EPHB2//FGF9//FZD3//SOBP//CHD7//OSR1//GLI2//CTHRC1//NIPBL
GO:0030900	forebrain development	Biological process	18	235	583	14742	1.93683	0.00575575	0.109027	2.2399	PAFAH1B1//LRP8//ZEB2//DPYSL2//BCL11B//SHANK3//NCOR1//WNT7B//ATG7//NF1//GLI2//PCSK1//PITX1//GNG12//SLIT1//EPHB2//NOTCH1//NR2F2
GO:0045616	regulation of keratinocyte differentiation	Biological process	4	19	583	14742	5.32346	0.00584094	0.109666	2.23352	OVOL2//NOTCH1//NCOA3//ERRFI1
GO:0090003	regulation of establishment of protein localization in plasma membrane	Biological process	4	19	583	14742	5.32346	0.00584094	0.109666	2.23352	PIK3R1//CLIP3//WNK3//LDLRAP1
GO:0007417	central nervous system development	Biological process	37	606	583	14742	1.54389	0.00588037	0.109922	2.2306	GLI2//BMPR2//DPYSL2//NR3C1//NF1//NKX2-2//SLIT1//TCF7//UNC5C//IRS2//SYNJ2//SLC7A11//NIPBL//MDGA1//NOTCH1//MDGA2//PAFAH1B1//NCOR1//ATG7//FZD3//LRP8//ZEB2//BCL11B//SHANK3//WNT7B//PLXNA2//PCSK1//PITX1//GNG12//EPHB2//NR2F2//EN2//MAP1B//STK4//TIMP3//CHD7//B3GNT5
GO:0045595	regulation of cell differentiation	Biological process	49	857	583	14742	1.44578	0.00593431	0.110147	2.22663	NOTCH1//NF1//EPHA3//FOXA1//HOXA11//ITGB3//ABL2//DCC//BCL11A//PAFAH1B1//ZCCHC11//OSR1//GLI2//FLT3LG//SIRT1//ERRFI1//OVOL2//NCOA3//PURB//FOXO3//RCOR1//DPYSL2//YWHAG//NKX2-2//PBX1//MAP1B//GDF6//NBR1//BMPR2//DLX5//WNT7B//SHANK3//FGF9//NEDD4//SLIT1//NRP1//CDH2//CHN1//RTN4R//SSH2//TIAM1//AP3D1//NEO1//EREG//NRG1//PLAG1//PDE3A//PDE5A//GDNF
GO:0048566	embryonic digestive tract development	Biological process	5	30	583	14742	4.21441	0.00596564	0.110147	2.22434	NIPBL//OVOL2//FGF9//FOXF2//GLI2
GO:0042640	anagen	Biological process	3	10	583	14742	7.58593	0.00599582	0.110147	2.22215	MYO5A//NOTCH1//MREG
GO:0071577	zinc ion transmembrane transport	Biological process	3	10	583	14742	7.58593	0.00599582	0.110147	2.22215	SLC39A14//SLC30A4//SLC30A8
GO:0016331	morphogenesis of embryonic epithelium	Biological process	11	116	583	14742	2.39785	0.00621092	0.113609	2.20684	STK4//OVOL2//FZD3//ZEB2//WNT7B//RDH10//GLI2//GDNF//OSR1//CTHRC1//JAG2
GO:0051050	positive regulation of transport	Biological process	27	408	583	14742	1.67337	0.00635643	0.115774	2.19679	SNCA//MAGI2//WNK3//CLIP3//SIRT1//DPYSL2//NR3C1//PIK3R1//IRS2//PSMD9//SLC30A8//STIM2//MLL//UBR5//GDNF//EDA//ADRA2A//AMPH//NEDD4//CBL//LDLRAP1//SGIP1//PCSK1//NOD2//EDNRA//WFS1//SCN1B
GO:0051094	positive regulation of developmental process	Biological process	36	589	583	14742	1.54552	0.00643555	0.116629	2.19141	GDNF//HOXA11//NOTCH1//BMPR2//OSR1//FLT3LG//GLI2//EDNRA//NCOA3//FOXO3//RCOR1//FOXA1//MAP1B//NKX2-2//GDF6//DLX5//WNT7B//PRKCB//HIPK1//PAFAH1B1//MKL2//SHANK3//BCL11A//TIAM1//AP3D1//CDH2//NEO1//NRG1//EPHB2//NLGN3//FGF9//PLAG1//PDE3A//PDE5A//BASP1//SIRT1
GO:0048732	gland development	Biological process	19	256	583	14742	1.87673	0.00645809	0.116629	2.1899	SLC29A2//SLC30A4//GLI2//PCSK1//PITX1//PLAG1//NR3C1//NF1//PBX1//NRG1//IRS2//CRKL//FOXA1//NOTCH1//MGMT//EDA//NRP1//NCOA3//WNT7B
GO:0048010	vascular endothelial growth factor receptor signaling pathway	Biological process	6	43	583	14742	3.52834	0.00654168	0.11764	2.18431	NEDD4//FGF9//ITGB3//PRKCB//BMPR2//NRP1
GO:0045807	positive regulation of endocytosis	Biological process	7	57	583	14742	3.10535	0.00694742	0.124411	2.15818	MAGI2//CBL//LDLRAP1//SGIP1//AMPH//SNCA//CLIP3
GO:0016569	covalent chromatin modification	Biological process	19	258	583	14742	1.86218	0.00700143	0.124854	2.15481	BCOR//DNMT3A//SIRT1//NCOA3//RNF2//KDM6B//NCOR1//NIPBL//KDM3A//PPARGC1A//SNCA//PRKCB//TAF12//WDR5//KAT7//MLL//SETD1B//WDR82//RCOR1
GO:0007350	blastoderm segmentation	Biological process	4	20	583	14742	5.05729	0.00707641	0.125665	2.15019	BASP1//GLI2//DLX5//EDNRA
GO:0055085	transmembrane transport	Biological process	52	931	583	14742	1.41235	0.00729792	0.129061	2.1368	SLC6A6//IRS2//SLC25A26//SLC29A2//GJB1//MYO5A//STIM2//WNK3//SIRT1//UBR5//GABRA1//ATP8B1//SCN1B//EDA//NF1//ADRA2A//GNAI2//CUL5//SLC30A4//SLC39A14//SLC30A8//KCNK10//HOMER1//ADCY3//KCNA6//SCN1A//SCN2A//SCN3A//SCN9A//TAP2//UCP3//SLC4A4//SLC4A7//ABCC5//TOMM40//SLC30A9//SLC7A11//FLVCR1//SLC38A2//TRPM7//MFSD6//HIAT1//SLC25A22//SLC38A1//HIATL1//KIAA1919//SLC44A3//SLC30A7//SLC2A12//SLC36A1//SLC41A1//SLC9A4
GO:0031644	regulation of neurological system process	Biological process	15	187	583	14742	2.02832	0.00743508	0.130076	2.12871	SNCA//NF1//CDH2//USP46//CTNND2//YWHAG//NETO1//SHANK3//GRM3//PPP3CA//GNAI2//GDNF//MAP1B//CACNA2D2//NLGN3
GO:0051090	regulation of sequence-specific DNA binding transcription factor activity	Biological process	22	316	583	14742	1.76045	0.00744616	0.130076	2.12807	ZCCHC11//SIRT1//PBX1//WFS1//FOXA1//NKX2-2//TAF12//NCOA3//PPARGC1A//EDA//PRKCB//NOD2//TAB3//FOXN3//FOXF2//FOXO1//FOXO3//FOXK2//FOXJ3//CREBZF//FOXP4//FOXK1
GO:0031399	regulation of protein modification process	Biological process	52	932	583	14742	1.41083	0.00744689	0.130076	2.12803	CCNT2//GNAI2//MAP3K1//MAP3K2//NOD2//TAB3//BCOR//EDNRA//ITGB3//SIRT1//CLIP3//PELI2//ADRA2A//EREG//ERRFI1//SNX6//NF1//YWHAG//PPM1E//WFS1//GOSR2//NRG1//DGKG//DGKZ//WNT7B//WNK3//BMPR2//GDF6//NCOR1//NIPBL//ATG7//ATG5//N4BP1//UBE2D1//PELI1//MRE11A//RAP2B//SNCA//LATS1//ADCY3//PPARGC1A//PDE5A//ZEB2//TWF1//NR2F2//HEXIM1//LRP8//NRP1//PSMB2//PSMD9//AFAP1L2//STK4
GO:0007160	cell-matrix adhesion	Biological process	12	136	583	14742	2.23116	0.00770085	0.133914	2.11346	NF1//ONECUT2//CDH13//TRPM7//EPHA3//EDA//ITGB3//ITGB8//NID1//PPFIA2//PPFIA1//RAPH1
GO:0006814	sodium ion transport	Biological process	13	153	583	14742	2.14852	0.00772944	0.133914	2.11185	WNK3//NEDD4//SCN1B//SCN1A//SCN2A//SCN3A//SCN9A//SLC4A4//SLC4A7//SLC38A2//SLC38A1//KIAA1919//SLC9A4
GO:0043549	regulation of kinase activity	Biological process	37	617	583	14742	1.51637	0.00777092	0.134088	2.10953	CCNT2//GNAI2//MAP3K1//MAP3K2//NOD2//TAB3//ADRA2A//EREG//ERRFI1//SNX6//NF1//YWHAG//PPM1E//WFS1//GOSR2//NRG1//DGKG//EDNRA//DGKZ//WNT7B//ITGB3//IRS2//MRE11A//ADCY3//PDE5A//ZEB2//PIK3R1//VAV3//NR2F2//LATS1//HEXIM1//LRP8//RAP2B//AFAP1L2//SNCA//STK4//SIRT1
GO:0061061	muscle structure development	Biological process	26	395	583	14742	1.66442	0.0078312	0.134583	2.10617	EGR3//FHL1//SGCB//FXR1//SIRT1//MKL2//FOXK1//NF1//NR2F2//MYH9//ADAM12//CACNA2D2//PITX1//CDH2//NEO1//QKI//NOTCH1//PPP3CA//NFATC3//WNT7B//EREG//NRG1//ATG7//ATG5//FGF9//BASP1
GO:0009214	cyclic nucleotide catabolic process	Biological process	3	11	583	14742	6.8963	0.00800436	0.134933	2.09667	PDE3A//PDE4D//PDE5A
GO:0045920	negative regulation of exocytosis	Biological process	3	11	583	14742	6.8963	0.00800436	0.134933	2.09667	ADRA2A//NOTCH1//SNCA
GO:2001237	negative regulation of extrinsic apoptotic signaling pathway	Biological process	3	11	583	14742	6.8963	0.00800436	0.134933	2.09667	GDNF//MCL1//ZMYND11
GO:0006793	phosphorus metabolic process	Biological process	76	1464	583	14742	1.31268	0.00800988	0.134933	2.09637	CCNT2//GNAI2//MAP3K1//MAP3K2//NOD2//TAB3//EDNRA//ITGB3//SIRT1//CLIP3//PELI2//ADRA2A//EREG//ERRFI1//SNX6//ABL2//ADRBK2//EPHB2//GMFB//MARK1//PRKCB//MAP2K4//STK4//LATS1//PIM2//ICK//TAOK3//WNK3//NF1//YWHAG//PPM1E//PPP1R12A//PPP3CA//PTPRD//SBF1//PTPN21//SSH2//AK3//MINPP1//WFS1//GOSR2//NRG1//DGKG//DGKZ//WNT7B//BMPR2//GDF6//DLG2//UBN1//CSRNP3//TOP1//CDC7//TNKS//MRE11A//RAP2B//MAGI2//SNCA//IRS2//ADCY3//N…
GO:0006796	phosphate-containing compound metabolic process	Biological process	76	1464	583	14742	1.31268	0.00800988	0.134933	2.09637	CCNT2//GNAI2//MAP3K1//MAP3K2//NOD2//TAB3//EDNRA//ITGB3//SIRT1//CLIP3//PELI2//ADRA2A//EREG//ERRFI1//SNX6//ABL2//ADRBK2//EPHB2//GMFB//MARK1//PRKCB//MAP2K4//STK4//LATS1//PIM2//ICK//TAOK3//WNK3//NF1//YWHAG//PPM1E//PPP1R12A//PPP3CA//PTPRD//SBF1//PTPN21//SSH2//AK3//MINPP1//WFS1//GOSR2//NRG1//DGKG//DGKZ//WNT7B//BMPR2//GDF6//DLG2//UBN1//CSRNP3//TOP1//CDC7//TNKS//MRE11A//RAP2B//MAGI2//SNCA//IRS2//ADCY3//N…
GO:0006325	chromatin organization	Biological process	32	516	583	14742	1.56815	0.00807204	0.135445	2.09302	BCOR//H1F0//SMARCD2//ARID1A//FOXA1//BAZ1A//PBRM1//NR3C1//SIRT1//DNMT3A//MLL//PRKCB//NCOR1//WDR5//KAT7//SETD1B//KDM6B//RCOR1//CHD5//CECR2//UBN1//CHD7//KDM3A//CHD9//AEBP2//NCOA3//RNF2//NIPBL//PPARGC1A//SNCA//TAF12//WDR82
GO:0060322	head development	Biological process	6	45	583	14742	3.37153	0.00817924	0.136172	2.08729	GLI2//DLX5//EDNRA//FLVCR1//CHD7//NIPBL
GO:0061387	regulation of extent of cell growth	Biological process	6	45	583	14742	3.37153	0.00817924	0.136172	2.08729	BCL11A//MAP1B//PAFAH1B1//DCC//SLIT1//NRP1
GO:0060562	epithelial tube morphogenesis	Biological process	16	207	583	14742	1.95451	0.00821152	0.136177	2.08558	GDNF//HOXA11//PBX1//GZF1//STK4//OVOL2//FZD3//ZEB2//BBS5//RDH10//FOXA1//GLI2//NR3C1//NCOA3//OSR1//CTHRC1
GO:0048729	tissue morphogenesis	Biological process	26	397	583	14742	1.65604	0.00833472	0.137364	2.07911	EDNRA//NFATC3//STK4//NRP1//GDNF//HOXA11//PBX1//GZF1//BMPR2//FZD3//OVOL2//ZEB2//BBS5//GLI2//MAGI2//JAG2//WNT7B//NOTCH1//FOXF2//ERRFI1//CTHRC1//RDH10//FOXA1//NR3C1//NCOA3//OSR1
GO:0051641	cellular localization	Biological process	91	1806	583	14742	1.27412	0.00837449	0.137364	2.07704	PAFAH1B1//CUX1//SNCA//CALU//GAS6//ITGB3//FGF9//PPP3CA//IPO7//EIF4E//YWHAG//AKAP5//XPO7//SDCBP//SEC62//NEDD4//AP3M1//NAGPA//TOMM70A//TOMM40//UCP3//STX2//AP3D1//SEC24D//SEC24A//COG2//SAR1B//SNX6//RFFL//MYO5A//VAMP3//LIN7C//LMAN1//SPAST//GOSR2//TRAPPC8//TRAPPC3//COG5//PLCB3//RAB14//EZR//ABAT//SLC38A2//SYT2//ADRA2A//PCSK1//CACNA2D2//KIF1B//RAB7A//PDIA4//MEX3D//DPYSL2//NR3C1//ZFYVE20//TAP2//NF1//SLC30…
GO:0030521	androgen receptor signaling pathway	Biological process	7	59	583	14742	3.00009	0.00837978	0.137364	2.07677	SIRT1//NCOA3//NRIP1//ARID1A//MED13//PPARGC1A//KDM3A
GO:0001504	neurotransmitter uptake	Biological process	4	21	583	14742	4.81647	0.00847273	0.137827	2.07198	SNCA//GDNF//GLUL//SLC38A1
GO:0048854	brain morphogenesis	Biological process	4	21	583	14742	4.81647	0.00847273	0.137827	2.07198	NF1//SLIT1//PAFAH1B1//SHANK3
GO:0032879	regulation of localization	Biological process	62	1157	583	14742	1.35502	0.00855686	0.138667	2.06769	SNCA//MAGI2//ADRA2A//PCSK1//CACNA2D2//AKAP5//BMPR2//ITGB3//NRP1//NR2F2//IRS2//WNK3//NEDD4//CLIP3//PRKCB//SIRT1//ABHD5//DPYSL2//NR3C1//PIK3R1//NF1//ABL2//CDH13//JAG2//MAP3K1//PLXNA2//UNC5C//ONECUT2//RAP2B//SCAI//MYO5A//PSMD9//SLC30A8//STIM2//MAP1B//MLL//CDH2//RAB14//UBR5//GDNF//EDA//AMPH//NOTCH1//PPP3CA//PPP1R12A//NPY1R//CBL//LDLRAP1//SGIP1//SLIT1//NOD2//NRG1//LATS1//EDNRA//GNAI2//WFS1//CHD7//SLC3…
GO:0035137	hindlimb morphogenesis	Biological process	5	33	583	14742	3.83128	0.00901637	0.14556	2.04497	AFF3//NOTCH1//PITX1//CHD7//OSR1
GO:0048762	mesenchymal cell differentiation	Biological process	11	123	583	14742	2.26139	0.0095233	0.153163	2.02121	GDNF//ZEB2//OVOL2//FOXF2//EPHA3//NOTCH1//FOXA1//EDNRA//NRG1//RDH10//OSR1
GO:0010720	positive regulation of cell development	Biological process	12	140	583	14742	2.16741	0.00960865	0.153955	2.01734	NOTCH1//MAP1B//PAFAH1B1//SHANK3//BCL11A//NKX2-2//TIAM1//PLAG1//PDE3A//PDE5A//GDNF//HOXA11
GO:0006810	transport	Biological process	158	3387	583	14742	1.17959	0.00986921	0.157282	2.00572	CUX1//GLUL//SLC38A1//EDNRA//SNCA//MAGI2//CALU//GAS6//ITGB3//SLC6A6//STX2//LMAN1//AP3D1//VAMP3//SEC24D//ACTR1A//SEC24A//TRAPPC8//AP3M1//TRAPPC3//CECR2//SAR1B//RAB14//FGF9//PPP3CA//IPO7//VAV3//EIF4E//YWHAG//AKAP5//XPO7//SDCBP//SEC62//NEDD4//NAGPA//TOMM70A//TOMM40//GRIA2//KCNA6//SCN1A//SCN1B//SCN2A//SCN3A//SCN9A//SLC4A4//CACNA2D2//SLC4A7//ZDHHC17//SLC39A14//SLC7A11//KCNK10//SLC38A2//TRPM7//STIM2//SL…
GO:0010469	regulation of receptor activity	Biological process	7	61	583	14742	2.90172	0.0100182	0.157282	1.99921	ADRA2A//EREG//ERRFI1//SNX6//MYO5A//NCOA3//SHANK3
GO:0007507	heart development	Biological process	23	344	583	14742	1.69066	0.0100218	0.157282	1.99905	OVOL2//BBS5//NIPBL//CHD7//NPY1R//STK4//NOTCH1//NRG1//ATG7//ATG5//FGF9//BASP1//CRKL//EDNRA//GLI2//MRE11A//NF1//NFATC3//NRP1//HEXIM1//BCOR//FOXP4//OSR1
GO:0030728	ovulation	Biological process	4	22	583	14742	4.59754	0.0100377	0.157282	1.99837	FOXO3//SIRT1//NRIP1//EREG
GO:0048169	regulation of long-term neuronal synaptic plasticity	Biological process	4	22	583	14742	4.59754	0.0100377	0.157282	1.99837	SHANK3//NF1//SNCA//NETO1
GO:0048640	negative regulation of developmental growth	Biological process	4	22	583	14742	4.59754	0.0100377	0.157282	1.99837	BCL11A//DCC//SLIT1//NRP1
GO:0048546	digestive tract morphogenesis	Biological process	6	47	583	14742	3.22806	0.0100922	0.157556	1.99602	NOTCH1//GLI2//NIPBL//OVOL2//FOXP4//STX2
GO:0001656	metanephros development	Biological process	8	76	583	14742	2.66173	0.0101331	0.157617	1.99426	WNT7B//BASP1//OSR1//GDNF//HOXA11//NF1//NIPBL//RDH10
GO:0045814	negative regulation of gene expression, epigenetic	Biological process	5	34	583	14742	3.7186	0.0102351	0.158051	1.98991	SIRT1//SIRT5//DNMT3A//MIER1//CREBZF
GO:0050771	negative regulation of axonogenesis	Biological process	5	34	583	14742	3.7186	0.0102351	0.158051	1.98991	BCL11A//DCC//SLIT1//NRP1//RTN4R
GO:0001542	ovulation from ovarian follicle	Biological process	3	12	583	14742	6.32161	0.0103626	0.158868	1.98453	NRIP1//FOXO3//SIRT1
GO:0090004	positive regulation of establishment of protein localization in plasma membrane	Biological process	3	12	583	14742	6.32161	0.0103626	0.158868	1.98453	PIK3R1//CLIP3//WNK3
GO:0051234	establishment of localization	Biological process	160	3442	583	14742	1.17543	0.010661	0.162784	1.9722	PAFAH1B1//CUX1//GLUL//SLC38A1//EDNRA//SNCA//MAGI2//CALU//GAS6//ITGB3//SLC6A6//STX2//LMAN1//AP3D1//VAMP3//SEC24D//ACTR1A//SEC24A//TRAPPC8//AP3M1//TRAPPC3//CECR2//SAR1B//RAB14//FGF9//PPP3CA//IPO7//VAV3//EIF4E//YWHAG//AKAP5//XPO7//SDCBP//SEC62//NEDD4//NAGPA//TOMM70A//TOMM40//GABRA1//GJB1//MYO5A//SLC4A4//QKI//ABCC5//LDLRAP1//FLVCR1//ERO1L//KCNK10//SLC25A26//MCART6//GRIA2//KCNA6//SCN1A//SCN1B//SCN2A//…
GO:0010975	regulation of neuron projection development	Biological process	14	177	583	14742	2.00006	0.0106944	0.162784	1.97084	ABL2//DCC//EPHA3//BCL11A//PAFAH1B1//MAP1B//NEDD4//SLIT1//NRP1//CDH2//CHN1//RTN4R//SSH2//TIAM1
GO:0030111	regulation of Wnt receptor signaling pathway	Biological process	13	160	583	14742	2.05452	0.0110439	0.167506	1.95688	ZEB2//FGF9//FAM123B//CDH2//NOTCH1//STK4//LATS1//DKK2//CTHRC1//DLX5//EDA//TNKS//UBR5
GO:0016570	histone modification	Biological process	18	252	583	14742	1.80617	0.0114642	0.171918	1.94066	BCOR//NCOA3//RNF2//SIRT1//KDM6B//NCOR1//NIPBL//KDM3A//PPARGC1A//SNCA//PRKCB//TAF12//WDR5//KAT7//MLL//SETD1B//WDR82//RCOR1
GO:0009755	hormone-mediated signaling pathway	Biological process	5	35	583	14742	3.61235	0.0115621	0.171918	1.93696	LANCL2//NR3C2//NR3C1//LATS1//KDM3A
GO:0045944	positive regulation of transcription from RNA polymerase II promoter	Biological process	35	592	583	14742	1.49498	0.0116166	0.171918	1.93492	NOTCH1//DLX5//EN2//FOXF2//FOXO1//FOXO3//GABPB1//GDNF//GLI2//FOXA1//MLL//NFATC3//NKX2-2//PBX1//PITX1//PLAGL2//POU2F1//PPP3CA//SS18//TBL1X//ZNF148//NCOA3//NRIP1//ONECUT2//MED13//PPARGC1A//KLF12//SIRT1//BCL11A//DCAF6//MOSPD1//MKL2//BCL11B//CSRNP3//OSR1
GO:0051338	regulation of transferase activity	Biological process	37	634	583	14742	1.47571	0.0116733	0.171918	1.93281	CCNT2//GNAI2//MAP3K1//MAP3K2//NOD2//TAB3//ADRA2A//EREG//ERRFI1//SNX6//NF1//YWHAG//PPM1E//WFS1//GOSR2//NRG1//DGKG//EDNRA//DGKZ//WNT7B//ITGB3//IRS2//MRE11A//ADCY3//PDE5A//ZEB2//PIK3R1//VAV3//NR2F2//LATS1//HEXIM1//LRP8//RAP2B//AFAP1L2//SNCA//STK4//SIRT1
GO:0007176	regulation of epidermal growth factor-activated receptor activity	Biological process	4	23	583	14742	4.39764	0.0117785	0.171918	1.92891	ADRA2A//EREG//ERRFI1//SNX6
GO:0032410	negative regulation of transporter activity	Biological process	4	23	583	14742	4.39764	0.0117785	0.171918	1.92891	STIM2//ADRA2A//GNAI2//SNCA
GO:0032873	negative regulation of stress-activated MAPK cascade	Biological process	4	23	583	14742	4.39764	0.0117785	0.171918	1.92891	NCOR1//ZMYND11//TAOK3//FOXO1
GO:0043616	keratinocyte proliferation	Biological process	4	23	583	14742	4.39764	0.0117785	0.171918	1.92891	OVOL2//BCL11B//CDH13//EREG
GO:0045604	regulation of epidermal cell differentiation	Biological process	4	23	583	14742	4.39764	0.0117785	0.171918	1.92891	ERRFI1//OVOL2//NOTCH1//NCOA3
GO:0061098	positive regulation of protein tyrosine kinase activity	Biological process	4	23	583	14742	4.39764	0.0117785	0.171918	1.92891	ADRA2A//EREG//NRG1//AFAP1L2
GO:0070303	negative regulation of stress-activated protein kinase signaling cascade	Biological process	4	23	583	14742	4.39764	0.0117785	0.171918	1.92891	FOXO1//NCOR1//ZMYND11//TAOK3
GO:0001525	angiogenesis	Biological process	22	330	583	14742	1.68576	0.0119885	0.174386	1.92123	EDNRA//NFATC3//STK4//NRP1//CDH13//NOTCH1//EGR3//COL4A3//NF1//PRKCB//HIPK1//ITGB3//EPHB2//EREG//FGF9//MYH9//VAV3//SIRT1//C1GALT1//OVOL2//NAA15//ARHGAP24
GO:0035556	intracellular signal transduction	Biological process	92	1855	583	14742	1.2541	0.0120757	0.175056	1.91809	MAP3K1//NF1//TAOK3//PSMB2//PSMD9//HTR1F//NPY1R//GNA12//ADCY3//GNAI2//GRM3//FZD3//HOMER1//MARK1//SS18//STK4//ICK//WNK3//TANK//TAB3//CRKL//MAP2K4//NOD2//WNT7B//MAP3K2//RND3//CHN1//PIK3R2//RAP2B//SOS1//TIAM1//RAB7A//RHOBTB1//VAV3//RGL1//ARHGEF3//RAB14//RALGPS2//C9ORF86//SRGAP1//ARHGAP24//ADRA2A//SDCBP//SHOC2//CDH13//EDNRA//PJA2//AKAP5//PIK3R1//NCOR1//CBL//NEDD4//PDE3A//PDE7A//FOXO1//FOXO3//IRS2//SIR…
GO:0030036	actin cytoskeleton organization	Biological process	24	370	583	14742	1.6402	0.012243	0.17688	1.91211	EZR//TWF1//PFN2//SSH2//LATS1//MAP3K1//FMNL2//CNN3//LIMCH1//TRPM7//MYH9//EPHA3//CUL3//ARHGEF10//PPM1E//ABL2//ADRA2A//RND3//NF1//PAFAH1B1//SDCBP//TNXB//CORO2A//PARVA
GO:0007243	intracellular protein kinase cascade	Biological process	42	743	583	14742	1.42938	0.0125322	0.180447	1.90197	MAP3K1//NF1//TAOK3//TANK//TAB3//CRKL//MAP2K4//NOD2//WNT7B//MAP3K2//PJA2//AKAP5//NBR1//FOXO1//MID1//EDA//PRKCB//PIM2//ZDHHC17//PELI2//PELI1//MIER1//ZMYND11//SIRT1//CDH2//FGF9//ZEB2//NCOR1//SDCBP//NOTCH1//MAGI2//IRS2//DCC//EDNRA//GAS6//GNA12//GNAI2//MARK1//SS18//STK4//ICK//WNK3
GO:0051049	regulation of transport	Biological process	47	851	583	14742	1.39655	0.0126964	0.181011	1.89632	SNCA//MAGI2//ADRA2A//PCSK1//CACNA2D2//AKAP5//IRS2//WNK3//NEDD4//CLIP3//PRKCB//SIRT1//DPYSL2//NR3C1//PIK3R1//NF1//ABL2//CDH13//MYO5A//PSMD9//SLC30A8//STIM2//ITGB3//MAP1B//MLL//UBR5//GDNF//EDA//AMPH//NOTCH1//PPP3CA//PPP1R12A//NPY1R//CBL//LDLRAP1//SGIP1//NOD2//NRG1//LATS1//EDNRA//GNAI2//WFS1//CHD7//NRP1//NCOR1//SCN1B//HOMER1
GO:0001763	morphogenesis of a branching structure	Biological process	14	181	583	14742	1.95586	0.0128359	0.181011	1.89158	EDNRA//NFATC3//STK4//NRP1//GDNF//HOXA11//PBX1//GZF1//GLI2//NOTCH1//RDH10//FOXA1//NCOA3//CTNND2
GO:0043687	post-translational protein modification	Biological process	14	181	583	14742	1.95586	0.0128359	0.181011	1.89158	ESCO1//GALNT3//GAS6//LMAN1//ATG5//SEC24D//SEC24A//GALNT6//SAR1B//C1GALT1//DOLPP1//ALG9//EDEM3//B3GNT5
GO:0050678	regulation of epithelial cell proliferation	Biological process	14	181	583	14742	1.95586	0.0128359	0.181011	1.89158	NF1//NR2F2//BMPR2//CDH13//EGR3//ITGB3//NRP1//DLX5//FGF9//NOTCH1//NOD2//OSR1//EREG//EDNRA
GO:0006476	protein deacetylation	Biological process	5	36	583	14742	3.51201	0.0130014	0.181011	1.88601	SIRT1//NCOR1//NIPBL//RCOR1//SIRT5
GO:0021515	cell differentiation in spinal cord	Biological process	5	36	583	14742	3.51201	0.0130014	0.181011	1.88601	NKX2-2//MDGA2//MDGA1//GLI2//NOTCH1
GO:0014048	regulation of glutamate secretion	Biological process	3	13	583	14742	5.83533	0.0130811	0.181011	1.88336	DPYSL2//NR3C1//SNCA
GO:0048207	vesicle targeting, rough ER to cis-Golgi	Biological process	3	13	583	14742	5.83533	0.0130811	0.181011	1.88336	SEC24D//SEC24A//SAR1B
GO:0048208	COPII vesicle coating	Biological process	3	13	583	14742	5.83533	0.0130811	0.181011	1.88336	SEC24D//SEC24A//SAR1B
GO:0090114	COPII-coated vesicle budding	Biological process	3	13	583	14742	5.83533	0.0130811	0.181011	1.88336	SEC24D//SEC24A//SAR1B
GO:2001234	negative regulation of apoptotic signaling pathway	Biological process	3	13	583	14742	5.83533	0.0130811	0.181011	1.88336	ZMYND11//GDNF//MCL1
GO:2001258	negative regulation of cation channel activity	Biological process	3	13	583	14742	5.83533	0.0130811	0.181011	1.88336	STIM2//ADRA2A//GNAI2
GO:0006486	protein glycosylation	Biological process	15	200	583	14742	1.89648	0.0133023	0.181921	1.87607	DOLPP1//ALG9//ST8SIA4//GALNT6//GALNT3//C1GALT1//B3GNT5//GXYLT1//LMAN1//SEC24D//SEC24A//SAR1B//EDEM3//FUT9//COG2
GO:0043413	macromolecule glycosylation	Biological process	15	200	583	14742	1.89648	0.0133023	0.181921	1.87607	ST8SIA4//FUT9//COG2//B3GNT5//DOLPP1//ALG9//GALNT6//GALNT3//C1GALT1//GXYLT1//LMAN1//SEC24D//SEC24A//SAR1B//EDEM3
GO:0007264	small GTPase mediated signal transduction	Biological process	35	598	583	14742	1.47998	0.013388	0.181921	1.87328	ADRA2A//CRKL//NF1//SDCBP//SOS1//SHOC2//CDH13//EDNRA//GNA12//ARHGEF3//SRGAP1//IQSEC2//RAP2B//CDH2//TIAM1//ARHGEF10//VAV3//CUL3//SCAI//DGKZ//RASAL2//CHN1//PIK3R2//RHOBTB1//RGL1//ARHGAP24//RND3//RAB7A//RAB14//RALGPS2//C9ORF86
GO:0042325	regulation of phosphorylation	Biological process	45	811	583	14742	1.40307	0.0135135	0.181921	1.86923	CCNT2//GNAI2//MAP3K1//MAP3K2//NOD2//TAB3//EDNRA//ITGB3//SIRT1//CLIP3//PELI2//ADRA2A//EREG//ERRFI1//SNX6//NF1//YWHAG//PPM1E//WFS1//GOSR2//NRG1//DGKG//DGKZ//WNT7B//WNK3//BMPR2//GDF6//MRE11A//RAP2B//SNCA//LATS1//IRS2//ADCY3//SDCBP//PDE5A//ZEB2//TWF1//PIK3R1//VAV3//NR2F2//HEXIM1//LRP8//NRP1//AFAP1L2//STK4
GO:0001938	positive regulation of endothelial cell proliferation	Biological process	6	50	583	14742	3.03437	0.0135273	0.181921	1.86879	BMPR2//CDH13//EGR3//ITGB3//NF1//NRP1
GO:0006497	protein lipidation	Biological process	6	50	583	14742	3.03437	0.0135273	0.181921	1.86879	NMT2//ALG9//CLIP3//ZDHHC17//ZDHHC15//ATG7
GO:0050768	negative regulation of neurogenesis	Biological process	8	80	583	14742	2.52864	0.0135932	0.181921	1.86668	NF1//BCL11A//DCC//NOTCH1//SLIT1//NRP1//RTN4R//WNT7B
GO:0048565	digestive tract development	Biological process	9	96	583	14742	2.3706	0.0136243	0.181921	1.86569	NOTCH1//GLI2//STX2//NIPBL//OVOL2//FGF9//FOXF2//FOXP4//NKX2-2
GO:0001736	establishment of planar polarity	Biological process	4	24	583	14742	4.21441	0.0137017	0.181921	1.86323	MAGI2//FOXF2//CTHRC1//FZD3
GO:0030947	regulation of vascular endothelial growth factor receptor signaling pathway	Biological process	4	24	583	14742	4.21441	0.0137017	0.181921	1.86323	NEDD4//FGF9//ITGB3//PRKCB
GO:0031111	negative regulation of microtubule polymerization or depolymerization	Biological process	4	24	583	14742	4.21441	0.0137017	0.181921	1.86323	MAP1B//MID1//SNCA//CLIP3
GO:0035195	gene silencing by miRNA	Biological process	4	24	583	14742	4.21441	0.0137017	0.181921	1.86323	ZCCHC11//LIN28B//TNRC6A//EIF2C4
GO:0048260	positive regulation of receptor-mediated endocytosis	Biological process	4	24	583	14742	4.21441	0.0137017	0.181921	1.86323	MAGI2//CBL//LDLRAP1//SGIP1
GO:0040007	growth	Biological process	41	727	583	14742	1.42606	0.0140226	0.185194	1.85317	FOXO3//EREG//MAGI2//NRG1//BMPR2//FHL1//SERTAD2//SIRT1//NDRG3//FOXK1//BCL11A//PLAG1//NCOA3//FLVCR1//GAS6//NPY1R//CACNA2D2//NCOR1//NIPBL//CHD7//NOTCH1//TIMP3//MYO5A//MREG//MAP1B//PAFAH1B1//WFS1//STK4//GLI2//HOXA11//DCC//NLGN3//SLIT1//NRP1//FGF9//BASP1//RDH10//WNT7B//VPS54//GDF6
GO:0014031	mesenchymal cell development	Biological process	10	113	583	14742	2.23774	0.0140351	0.185194	1.85278	GDNF//ZEB2//OVOL2//FOXF2//EPHA3//NOTCH1//FOXA1//EDNRA//NRG1//RDH10
GO:0048568	embryonic organ development	Biological process	19	277	583	14742	1.73445	0.0142442	0.187373	1.84636	RDH10//OSR1//FLT3LG//MLL//PBX1//SH2B3//NIPBL//DLX5//EPHB2//FGF9//FZD3//SOBP//CHD7//OVOL2//FOXF2//GLI2//STK4//WNT7B//CTHRC1
GO:0070085	glycosylation	Biological process	15	202	583	14742	1.87771	0.0144586	0.189608	1.83987	ST8SIA4//FUT9//COG2//B3GNT5//DOLPP1//ALG9//GALNT6//GALNT3//C1GALT1//GXYLT1//LMAN1//SEC24D//SEC24A//SAR1B//EDEM3
GO:0035601	protein deacylation	Biological process	5	37	583	14742	3.41709	0.014557	0.190312	1.83693	SIRT5//SIRT1//NCOR1//NIPBL//RCOR1
GO:0051056	regulation of small GTPase mediated signal transduction	Biological process	23	356	583	14742	1.63368	0.0146143	0.190478	1.83522	IQSEC2//ASAP1//CHN1//NF1//EPHA3//PAFAH1B1//RASAL2//SOS1//ERRFI1//CDH2//TIAM1//ARHGEF10//VAV3//ARHGEF3//CUL3//SCAI//SHOC2//DGKZ//PIK3R2//RHOBTB1//RGL1//SRGAP1//ARHGAP24
GO:0051239	regulation of multicellular organismal process	Biological process	78	1550	583	14742	1.27248	0.0148797	0.193346	1.8274	GDNF//HOXA11//ADRA2A//EREG//PELI1//SNCA//SGIP1//PDE5A//NOTCH1//NLGN3//MAGI2//NF1//BMPR2//EPHA3//FOXA1//ABL2//DCC//BCL11A//PAFAH1B1//SEPT7//COL4A3//GLI2//PBX1//NBR1//TXLNG//OSR1//BCOR//CDH2//USP46//ATG5//AFAP1L2//NOD2//ZCCHC11//FLT3LG//NPY1R//CACNA2D2//NCOR1//NIPBL//CHD7//EDNRA//ITGB3//ERRFI1//OVOL2//NCOA3//PURB//FOXO3//RCOR1//DPYSL2//YWHAG//NKX2-2//MAP1B//GDF6//DLX5//WNT7B//PRKCB//HIPK1//MKL2//CT…
GO:0008361	regulation of cell size	Biological process	7	66	583	14742	2.6819	0.0151188	0.195855	1.82048	BCL11A//MAP1B//PAFAH1B1//DCC//SLIT1//NRP1//E2F4
GO:0008152	metabolic process	Biological process	386	9124	583	14742	1.06977	0.015392	0.19879	1.81271	ERO1L//SIRT1//MRE11A//ATG5//ORC4//TOP1//CDC7//DBF4//KAT7//RRM2B//REV1//CCNT2//E2F4//NPAT//AHCY//CUX1//DNMT3A//FOXO3//NR6A1//GLI2//MECP2//NFX1//NOTCH1//RNF2//TBL1X//NR2F2//ZNF148//NRIP1//NCOR1//NCOR2//HEXIM1//ZMYND11//ZHX1//KLF12//KDM6B//RCOR1//ZMYND8//NIPBL//BCOR//MOSPD1//GZF1//LCOR//JDP2//OSR1//GNAI2//MAP3K1//MAP3K2//NOD2//TAB3//PSMB2//PSMD9//UBE2D1//UBE2V2//TNKS//UBR5//CHFR//NEDD4//HERC3//ZFP36…
GO:0006109	regulation of carbohydrate metabolic process	Biological process	8	82	583	14742	2.46697	0.0156147	0.199251	1.80647	NR3C1//SIRT1//IRS2//FOXO1//PPARGC1A//DDIT4//SNCA//NCOR1
GO:0010675	regulation of cellular carbohydrate metabolic process	Biological process	8	82	583	14742	2.46697	0.0156147	0.199251	1.80647	NR3C1//SIRT1//IRS2//FOXO1//PPARGC1A//DDIT4//SNCA//NCOR1
GO:0032409	regulation of transporter activity	Biological process	8	82	583	14742	2.46697	0.0156147	0.199251	1.80647	MYO5A//STIM2//SNCA//MLL//WNK3//ADRA2A//GNAI2//HOMER1
GO:0042472	inner ear morphogenesis	Biological process	8	82	583	14742	2.46697	0.0156147	0.199251	1.80647	CHD7//GLI2//CTHRC1//DLX5//EPHB2//FGF9//FZD3//SOBP
GO:0007164	establishment of tissue polarity	Biological process	4	25	583	14742	4.04583	0.0158131	0.20118	1.80098	FZD3//MAGI2//FOXF2//CTHRC1
GO:0001556	oocyte maturation	Biological process	3	14	583	14742	5.41852	0.0161673	0.203395	1.79136	EREG//FOXO3//PDE3A
GO:0048820	hair follicle maturation	Biological process	3	14	583	14742	5.41852	0.0161673	0.203395	1.79136	MYO5A//NOTCH1//MREG
GO:0072530	purine-containing compound transmembrane transport	Biological process	3	14	583	14742	5.41852	0.0161673	0.203395	1.79136	SLC25A26//SLC29A2//GJB1
GO:0014032	neural crest cell development	Biological process	6	52	583	14742	2.91767	0.0162258	0.203395	1.78979	GDNF//ZEB2//OVOL2//EDNRA//NRG1//RDH10
GO:0046620	regulation of organ growth	Biological process	6	52	583	14742	2.91767	0.0162258	0.203395	1.78979	STK4//CACNA2D2//FGF9//NRG1//BASP1//FLVCR1
GO:0090090	negative regulation of canonical Wnt receptor signaling pathway	Biological process	7	67	583	14742	2.64187	0.0163263	0.204055	1.78711	CDH2//NOTCH1//STK4//LATS1//DKK2//CTHRC1//FAM123B
GO:0051656	establishment of organelle localization	Biological process	9	99	583	14742	2.29877	0.016408	0.204476	1.78494	PAFAH1B1//MYO5A//BBS5//SLIT1//MAP1B//SEC24D//SEC24A//SAR1B//MYH9
GO:0035282	segmentation	Biological process	8	83	583	14742	2.43725	0.0167032	0.207548	1.7772	PLXNA2//ZEB2//BASP1//GLI2//NOTCH1//DLX5//EDNRA//OSR1
GO:0032535	regulation of cellular component size	Biological process	12	151	583	14742	2.00952	0.0167665	0.207729	1.77556	TWF1//PFN2//SSH2//E2F4//BCL11A//LATS1//MAP3K1//MAP1B//PAFAH1B1//DCC//SLIT1//NRP1
GO:0048193	Golgi vesicle transport	Biological process	13	169	583	14742	1.94511	0.0168158	0.207736	1.77428	CUX1//LMAN1//SPAST//GOSR2//SEC24D//SEC24A//TRAPPC8//TRAPPC3//SAR1B//COG5//COG2//PLCB3//RAB14
GO:0032872	regulation of stress-activated MAPK cascade	Biological process	11	134	583	14742	2.07575	0.0172886	0.21296	1.76224	WNT7B//MAP3K2//FOXO1//MID1//TAOK3//NOD2//ZEB2//NCOR1//ZMYND11//SDCBP//NBR1
GO:0050808	synapse organization	Biological process	9	100	583	14742	2.27578	0.0174223	0.213989	1.75889	CDH2//MAP1B//NLGN3//CACNA2D2//SHANK3//SLIT1//EPHB2//MYO5A//WNT7B
GO:0060560	developmental growth involved in morphogenesis	Biological process	10	117	583	14742	2.16123	0.0175525	0.214967	1.75566	MAGI2//BCL11A//MAP1B//PAFAH1B1//DCC//NLGN3//SLIT1//NRP1//RDH10//WNT7B
GO:0030522	intracellular receptor mediated signaling pathway	Biological process	15	207	583	14742	1.83235	0.0176904	0.215599	1.75226	MED13//ARID1A//NCOA3//NRIP1//PPARGC1A//KDM3A//FOXA1//SIRT1//NOD2//TAB3//NR3C1//NEDD4//UBR5//NR6A1//NR2F2
GO:0008344	adult locomotory behavior	Biological process	6	53	583	14742	2.86262	0.0177052	0.215599	1.7519	SCN1A//ATG7//CHD7//GDNF//PAFAH1B1//SNCA
GO:0001578	microtubule bundle formation	Biological process	4	26	583	14742	3.89022	0.0181181	0.219373	1.74189	TTLL3//MAP1B//SPAST//NAV1
GO:0090287	regulation of cellular response to growth factor stimulus	Biological process	4	26	583	14742	3.89022	0.0181181	0.219373	1.74189	NEDD4//FGF9//ITGB3//PRKCB
GO:0070302	regulation of stress-activated protein kinase signaling cascade	Biological process	11	135	583	14742	2.06038	0.018177	0.219463	1.74048	WNT7B//MAP3K2//NBR1//FOXO1//MID1//TAOK3//NOD2//ZEB2//NCOR1//ZMYND11//SDCBP
GO:0061138	morphogenesis of a branching epithelium	Biological process	12	153	583	14742	1.98325	0.0184134	0.221689	1.73487	EDNRA//NFATC3//STK4//NRP1//GDNF//HOXA11//PBX1//GZF1//RDH10//FOXA1//GLI2//NCOA3
GO:0001936	regulation of endothelial cell proliferation	Biological process	7	69	583	14742	2.56529	0.0189432	0.225724	1.72255	NF1//NR2F2//BMPR2//CDH13//EGR3//ITGB3//NRP1
GO:0046578	regulation of Ras protein signal transduction	Biological process	18	266	583	14742	1.71111	0.0189486	0.225724	1.72242	IQSEC2//ASAP1//CHN1//NF1//EPHA3//PAFAH1B1//RASAL2//SOS1//ERRFI1//CDH2//TIAM1//ARHGEF10//VAV3//ARHGEF3//CUL3//SCAI//SHOC2//DGKZ
GO:0007155	cell adhesion	Biological process	49	916	583	14742	1.35266	0.0189604	0.225724	1.72215	CDH2//NF1//ONECUT2//CDH13//CDH11//DSC2//DSC3//CELSR3//PCDH10//PCDH20//CTNND2//NLGN3//EZR//EDA//ITGB3//ITGB8//NID1//PPFIA2//PPFIA1//RAPH1//NOTCH1//MYH9//CLDN10//TRPM7//CD47//ABL2//JAG2//PPP1R12A//NUAK1//VAMP3//NRG1//VAV3//EPHA3//WNT7B//PLEKHA7//FOXA1//RND3//COL4A3//NEO1//TNXB//ADAM12//PPFIBP1//NRP1//PLXNC1//PDZD2//PARVA//LMLN//SSX2IP//NPNT
GO:0022610	biological adhesion	Biological process	49	916	583	14742	1.35266	0.0189604	0.225724	1.72215	CDH2//NF1//ONECUT2//CDH13//RND3//CD47//CDH11//COL4A3//CTNND2//DSC2//DSC3//CELSR3//EPHA3//ITGB3//ITGB8//NEO1//NID1//TNXB//ADAM12//PPFIBP1//NRP1//CLDN10//PLXNC1//PDZD2//NLGN3//PARVA//PCDH10//PCDH20//LMLN//SSX2IP//NPNT//EZR//EDA//PPFIA2//PPFIA1//RAPH1//NOTCH1//MYH9//TRPM7//ABL2//JAG2//PPP1R12A//NUAK1//VAMP3//NRG1//VAV3//WNT7B//PLEKHA7//FOXA1
GO:0090066	regulation of anatomical structure size	Biological process	17	247	583	14742	1.74036	0.0191369	0.227191	1.71813	TWF1//PFN2//SSH2//E2F4//EDNRA//BCL11A//LATS1//MAP3K1//PDE5A//ATG5//MAP1B//PAFAH1B1//BMPR2//NPY1R//DCC//SLIT1//NRP1
GO:0010721	negative regulation of cell development	Biological process	9	102	583	14742	2.23116	0.019587	0.231289	1.70803	NF1//FOXA1//BCL11A//DCC//NOTCH1//SLIT1//NRP1//WNT7B//RTN4R
GO:0007423	sensory organ development	Biological process	23	366	583	14742	1.58904	0.0196019	0.231289	1.7077	HIPK1//JAG2//NOTCH1//POU2F1//RDH10//BCL11B//NIPBL//DLX5//EPHB2//FGF9//FZD3//SOBP//CHD7//OSR1//CUX1//MAP3K1//NF1//ATG5//BMPR2//CTHRC1//SLC7A11//WNT7B//GLI2
GO:0031589	cell-substrate adhesion	Biological process	14	191	583	14742	1.85346	0.0196449	0.231289	1.70675	NF1//ONECUT2//CDH13//EDA//ITGB3//ITGB8//NID1//PPFIA2//PPFIA1//RAPH1//NOTCH1//TRPM7//VAMP3//EPHA3
GO:0048584	positive regulation of response to stimulus	Biological process	52	985	583	14742	1.33492	0.0199366	0.234077	1.70035	TAP2//MAP3K1//MAP2K4//PELI2//PELI1//NOD2//TAB3//PDE5A//SIRT1//ADRA2A//EREG//LANCL2//HOMER1//LDLRAP1//AKAP5//BMPR2//GDF6//CBL//NEDD4//PIK3R1//PIK3R2//ZEB2//NOTCH1//FGF9//ITGB3//PRKCB//MID1//TAOK3//FOXA1//NCOA3//EDA//PIM2//ZDHHC17//MIER1//CDH2//MGMT//AFAP1L2//SDCBP//WNT7B//SHOC2//EDNRA//CDH13//VAV3//DCC//GAS6//DLX5//TNKS//DKK2//UBR5//FAM123B//SGIP1//MLL
GO:0021537	telencephalon development	Biological process	11	137	583	14742	2.0303	0.020055	0.23482	1.69778	PAFAH1B1//LRP8//ZEB2//DPYSL2//BCL11B//SHANK3//NF1//ATG7//GNG12//SLIT1//EPHB2
GO:0010906	regulation of glucose metabolic process	Biological process	7	70	583	14742	2.52864	0.020356	0.237042	1.69131	NR3C1//IRS2//FOXO1//PPARGC1A//DDIT4//NCOR1//SIRT1
GO:0035265	organ growth	Biological process	7	70	583	14742	2.52864	0.020356	0.237042	1.69131	FLVCR1//STK4//CACNA2D2//FGF9//NRG1//BASP1//PLAG1
GO:0001505	regulation of neurotransmitter levels	Biological process	10	120	583	14742	2.1072	0.0205886	0.238177	1.68637	GLUL//SLC38A1//SNCA//ABAT//RAB14//SLC38A2//LIN7C//SYT2//NF1//GDNF
GO:0016441	posttranscriptional gene silencing	Biological process	4	27	583	14742	3.74614	0.0206212	0.238177	1.68569	ZCCHC11//LIN28B//TNRC6A//EIF2C4
GO:0035194	posttranscriptional gene silencing by RNA	Biological process	4	27	583	14742	3.74614	0.0206212	0.238177	1.68569	ZCCHC11//LIN28B//TNRC6A//EIF2C4
GO:0042158	lipoprotein biosynthetic process	Biological process	6	55	583	14742	2.75852	0.0209362	0.241162	1.6791	ATG7//NMT2//ALG9//CLIP3//ZDHHC17//ZDHHC15
GO:0008219	cell death	Biological process	82	1667	583	14742	1.24384	0.0211097	0.242506	1.67552	IRS2//DCC//EPHA3//FOXO3//GLI2//H1F0//MCL1//MLL//PEG3//PRKCB//PSMB2//PSMD9//SCN2A//MAP2K4//SOS1//TIAM1//FXR1//UNC5C//VAV3//PEG10//KIF1B//GRAMD4//CECR2//ARHGEF3//DDIT4//AVEN//RFFL//UNC5D//HIPK1//BCL2L15//KLLN//FOXO1//GDNF//NR3C1//NRG1//SNCA//PIM2//WNK3//COL4A3//PLAGL2//STK4//WNT7B//LYST//TOP1//LYZ//MMD//CUL5//CUL3//FOXA1//MAP3K1//PPARGC1A//JAG2//MNT//WFS1//SIRT1//NOD2//NF1//NOTCH1//PDE5A//CLIP3//CS…
GO:0045597	positive regulation of cell differentiation	Biological process	26	430	583	14742	1.52895	0.0212148	0.243058	1.67336	NOTCH1//HOXA11//FLT3LG//GLI2//NCOA3//FOXO3//RCOR1//FOXA1//MAP1B//NKX2-2//GDF6//BMPR2//DLX5//WNT7B//PAFAH1B1//SHANK3//BCL11A//TIAM1//AP3D1//CDH2//NEO1//NRG1//PLAG1//PDE3A//PDE5A//GDNF
GO:0050673	epithelial cell proliferation	Biological process	15	212	583	14742	1.78914	0.0214481	0.245033	1.66861	NF1//NR2F2//BMPR2//CDH13//EGR3//ITGB3//NRP1//EDNRA//DLX5//FGF9//NOTCH1//NOD2//OSR1//EREG//C6ORF89
GO:0030029	actin filament-based process	Biological process	25	410	583	14742	1.54186	0.0215022	0.245033	1.66752	EZR//TWF1//ADRA2A//RND3//NF1//PAFAH1B1//PFN2//SDCBP//TNXB//CORO2A//PARVA//SSH2//FMNL2//MYH9//MYO5A//LATS1//MAP3K1//CNN3//LIMCH1//TRPM7//EPHA3//CUL3//ARHGEF10//PPM1E//ABL2
GO:0016265	death	Biological process	82	1669	583	14742	1.24235	0.02167	0.246286	1.66414	IRS2//DCC//EPHA3//FOXO3//GLI2//H1F0//MCL1//MLL//PEG3//PRKCB//PSMB2//PSMD9//SCN2A//MAP2K4//SOS1//TIAM1//FXR1//UNC5C//VAV3//PEG10//KIF1B//GRAMD4//CECR2//ARHGEF3//DDIT4//AVEN//RFFL//UNC5D//HIPK1//BCL2L15//KLLN//FOXO1//GDNF//NR3C1//NRG1//SNCA//PIM2//WNK3//COL4A3//PLAGL2//STK4//WNT7B//LYST//DAGLA//EIF4G2//SPAST//HSPB8//FLVCR1//TRPM7//TOP1//LYZ//MMD//CUL5//CUL3//FOXA1//MAP3K1//PPARGC1A//JAG2//MNT//WFS1…
GO:0035264	multicellular organism growth	Biological process	9	104	583	14742	2.18825	0.0219398	0.247548	1.65877	NPY1R//CACNA2D2//NCOR1//NIPBL//CHD7//PLAG1//NCOA3//FLVCR1
GO:0055123	digestive system development	Biological process	9	104	583	14742	2.18825	0.0219398	0.247548	1.65877	NOTCH1//GLI2//STX2//NIPBL//OVOL2//NKX2-2//FGF9//FOXF2//FOXP4
GO:0030512	negative regulation of transforming growth factor beta receptor signaling pathway	Biological process	5	41	583	14742	3.08371	0.0220133	0.247548	1.65731	NR3C1//ONECUT2//PEG10//SIRT1//SNX6
GO:0030516	regulation of axon extension	Biological process	5	41	583	14742	3.08371	0.0220133	0.247548	1.65731	BCL11A//MAP1B//PAFAH1B1//SLIT1//NRP1
GO:0051246	regulation of protein metabolic process	Biological process	65	1283	583	14742	1.28107	0.0222922	0.250024	1.65185	CCNT2//GNAI2//MAP3K1//MAP3K2//NOD2//TAB3//BCOR//EDNRA//ITGB3//SIRT1//CLIP3//PELI2//ADRA2A//EREG//ERRFI1//SNX6//ZFP36L1//EIF4E//FOXO3//QKI//TNRC6A//TNRC6C//CPEB2//EIF2C4//EIF4G2//NF1//YWHAG//PPM1E//WFS1//GOSR2//NRG1//DGKG//DGKZ//WNT7B//WNK3//BMPR2//GDF6//FXR1//NCOR1//NIPBL//ATG7//ATG5//N4BP1//UBE2D1//PELI1//MRE11A//RAP2B//SNCA//LATS1//ADCY3//PPARGC1A//PDE5A//ZEB2//TWF1//NEDD4//NR2F2//HEXIM1//LRP8/…
GO:0042475	odontogenesis of dentin-containing tooth	Biological process	6	56	583	14742	2.70926	0.0226921	0.253842	1.64413	EDA//GLI2//JAG2//WNT7B//SOSTDC1//BCL11B
GO:0035270	endocrine system development	Biological process	10	122	583	14742	2.07266	0.022815	0.254548	1.64178	NKX2-2//GLI2//PCSK1//PITX1//NR3C1//NF1//PBX1//FOXO1//ONECUT2//CRKL
GO:0051403	stress-activated MAPK cascade	Biological process	14	195	583	14742	1.81544	0.023025	0.255718	1.6378	CRKL//MAP2K4//NOD2//TAB3//WNT7B//MAP3K2//NBR1//FOXO1//MID1//TAOK3//ZEB2//NCOR1//ZMYND11//SDCBP
GO:0030100	regulation of endocytosis	Biological process	9	105	583	14742	2.16741	0.0231893	0.255718	1.63471	MAGI2//AMPH//SNCA//CLIP3//CBL//LDLRAP1//SGIP1//ABL2//CDH13
GO:0009954	proximal/distal pattern formation	Biological process	4	28	583	14742	3.61235	0.0233263	0.255718	1.63215	OSR1//GLI2//HOXA11//PBX1
GO:0009125	nucleoside monophosphate catabolic process	Biological process	3	16	583	14742	4.74121	0.0234598	0.255718	1.62968	PDE3A//PDE4D//PDE5A
GO:0021955	central nervous system neuron axonogenesis	Biological process	3	16	583	14742	4.74121	0.0234598	0.255718	1.62968	PAFAH1B1//GLI2//ATG7
GO:0030517	negative regulation of axon extension	Biological process	3	16	583	14742	4.74121	0.0234598	0.255718	1.62968	SLIT1//NRP1//BCL11A
GO:0030949	positive regulation of vascular endothelial growth factor receptor signaling pathway	Biological process	3	16	583	14742	4.74121	0.0234598	0.255718	1.62968	FGF9//ITGB3//PRKCB
GO:0032413	negative regulation of ion transmembrane transporter activity	Biological process	3	16	583	14742	4.74121	0.0234598	0.255718	1.62968	STIM2//ADRA2A//GNAI2
GO:0048488	synaptic vesicle endocytosis	Biological process	3	16	583	14742	4.74121	0.0234598	0.255718	1.62968	ZDHHC15//AMPH//SNCA
GO:0006473	protein acetylation	Biological process	10	123	583	14742	2.05581	0.0239912	0.260843	1.61995	NAA15//NCOA3//SIRT1//ESCO1//PPARGC1A//SNCA//TAF12//WDR5//KAT7//MLL
GO:0034968	histone lysine methylation	Biological process	5	42	583	14742	3.01029	0.0242018	0.262463	1.61615	BCOR//MLL//WDR5//SETD1B//WDR82
GO:0000226	microtubule cytoskeleton organization	Biological process	17	254	583	14742	1.6924	0.0243344	0.263231	1.61378	PAFAH1B1//MYH9//MAP1B//SPAST//NAV1//RANBP9//MID1//TNKS//SNCA//CLIP3//TTLL3//NCOR1//PPP1R12A//ARHGEF10//EPHA3//MARK1//SS18
GO:0003002	regionalization	Biological process	18	274	583	14742	1.66115	0.0246631	0.266111	1.60795	PLXNA2//ZEB2//GDNF//HOXA11//BASP1//GLI2//NOTCH1//RNF2//BMPR2//CRKL//PBX1//NR2F2//WNT7B//OVOL2//DLX5//EDNRA//NKX2-2//OSR1
GO:0031098	stress-activated protein kinase signaling cascade	Biological process	14	198	583	14742	1.78793	0.0258324	0.276787	1.58784	CRKL//MAP2K4//NOD2//TAB3//WNT7B//MAP3K2//NBR1//FOXO1//MID1//TAOK3//ZEB2//NCOR1//ZMYND11//SDCBP
GO:0001932	regulation of protein phosphorylation	Biological process	41	758	583	14742	1.36774	0.0258812	0.276787	1.58702	CCNT2//GNAI2//MAP3K1//MAP3K2//NOD2//TAB3//EDNRA//ITGB3//SIRT1//CLIP3//PELI2//ADRA2A//EREG//ERRFI1//SNX6//NF1//YWHAG//PPM1E//WFS1//GOSR2//NRG1//DGKG//DGKZ//WNT7B//WNK3//BMPR2//GDF6//MRE11A//RAP2B//SNCA//LATS1//ADCY3//PDE5A//ZEB2//TWF1//NR2F2//HEXIM1//LRP8//NRP1//AFAP1L2//STK4
GO:0003008	system process	Biological process	77	1568	583	14742	1.24175	0.0260299	0.276787	1.58453	GLUL//SLC38A1//SNCA//PDE5A//NLGN3//RRM2B//JAG2//BMPR2//WFS1//EDNRA//CNN3//ABAT//ADCY3//AMPH//DLG2//GABRA1//GNAI2//GRIA2//GRM3//HTR1F//KCNA6//MYO5A//NOVA1//NPY1R//PAFAH1B1//PLCB3//PRKCB//SCN1B//SDCBP//BSN//HOMER1//AKAP5//KCNK10//SLC38A2//GNG12//GRIP2//SYT2//RAB14//LIN7C//KIF1B//EGR3//ATG7//NFAT5//RPE65//TIMP3//BBS5//RDH10//COL4A3//TBL1X//NIPBL//SOBP//CHD7//CTNND2//NETO1//PJA2//E2F4//NF1//NR3C1//ZD…
GO:0035023	regulation of Rho protein signal transduction	Biological process	12	161	583	14742	1.8847	0.0262307	0.276787	1.58119	CHN1//EPHA3//PAFAH1B1//SOS1//ERRFI1//CUL3//SCAI//CDH2//TIAM1//ARHGEF10//VAV3//ARHGEF3
GO:0001569	patterning of blood vessels	Biological process	4	29	583	14742	3.48779	0.0262369	0.276787	1.58109	EDNRA//NFATC3//STK4//NRP1
GO:0008038	neuron recognition	Biological process	4	29	583	14742	3.48779	0.0262369	0.276787	1.58109	CELSR3//EPHB2//NRP1//EPHA3
GO:0010506	regulation of autophagy	Biological process	4	29	583	14742	3.48779	0.0262369	0.276787	1.58109	PIM2//SIRT1//ABL2//ULK2
GO:0016575	histone deacetylation	Biological process	4	29	583	14742	3.48779	0.0262369	0.276787	1.58109	NCOR1//NIPBL//SIRT1//RCOR1
GO:0090002	establishment of protein localization in plasma membrane	Biological process	4	29	583	14742	3.48779	0.0262369	0.276787	1.58109	LDLRAP1//PIK3R1//CLIP3//WNK3
GO:0010608	posttranscriptional regulation of gene expression	Biological process	20	316	583	14742	1.60041	0.0264025	0.277451	1.57836	ZFP36L1//EIF4E//FOXO3//QKI//TNRC6A//TNRC6C//CPEB2//EIF2C4//EIF4G2//MEX3D//DSC3//WFS1//PPARGC1A//PIM2//FXR1//ZCCHC11//LIN28B//SNCA//SIRT1//GDNF
GO:0051051	negative regulation of transport	Biological process	16	237	583	14742	1.7071	0.0264301	0.277451	1.5779	ADRA2A//IRS2//NEDD4//PRKCB//NF1//STIM2//ITGB3//MAP1B//SNCA//NOTCH1//PPP3CA//PSMD9//NPY1R//NRG1//LATS1//GNAI2
GO:0051640	organelle localization	Biological process	11	143	583	14742	1.94511	0.026548	0.278004	1.57597	PAFAH1B1//MYO5A//BBS5//SLIT1//MAP1B//SEC24D//SEC24A//SAR1B//SYNJ2//MYH9//PLXNA2
GO:0045859	regulation of protein kinase activity	Biological process	33	588	583	14742	1.41914	0.027387	0.286087	1.56246	CCNT2//GNAI2//MAP3K1//MAP3K2//NOD2//TAB3//ADRA2A//EREG//ERRFI1//SNX6//NF1//YWHAG//PPM1E//WFS1//GOSR2//NRG1//DGKG//EDNRA//DGKZ//WNT7B//ITGB3//ADCY3//PDE5A//ZEB2//NR2F2//LATS1//HEXIM1//LRP8//RAP2B//AFAP1L2//SNCA//STK4//SIRT1
GO:0031113	regulation of microtubule polymerization	Biological process	3	17	583	14742	4.46231	0.0276686	0.287619	1.55801	SNCA//CLIP3//MAP1B
GO:0035329	hippo signaling cascade	Biological process	3	17	583	14742	4.46231	0.0276686	0.287619	1.55801	STK4//TEAD1//LATS1
GO:0043270	positive regulation of ion transport	Biological process	7	75	583	14742	2.36007	0.0285277	0.294582	1.54473	WNK3//STIM2//ADRA2A//EDNRA//SNCA//WFS1//SCN1B
GO:0061351	neural precursor cell proliferation	Biological process	7	75	583	14742	2.36007	0.0285277	0.294582	1.54473	NOTCH1//PAFAH1B1//NF1//WNT7B//ZEB2//FZD3
GO:0051238	sequestering of metal ion	Biological process	6	59	583	14742	2.5715	0.0285458	0.294582	1.54446	SLC30A7//SLC30A8//SLC30A4//AP3D1
GO:0032835	glomerulus development	Biological process	5	44	583	14742	2.87346	0.0289867	0.297889	1.5378	COL4A3//NID1//MAGI2//BASP1//OSR1
GO:0042594	response to starvation	Biological process	8	92	583	14742	2.19882	0.0290658	0.297889	1.53662	ATG5//BMPR2//SIRT1//TNRC6A//NBR1//ULK2//ATG7//PPARGC1A
GO:0001738	morphogenesis of a polarized epithelium	Biological process	4	30	583	14742	3.37153	0.0293556	0.297889	1.53231	FZD3//MAGI2//FOXF2//CTHRC1
GO:0006342	chromatin silencing	Biological process	4	30	583	14742	3.37153	0.0293556	0.297889	1.53231	SIRT1//DNMT3A//MIER1//SIRT5
GO:0014047	glutamate secretion	Biological process	4	30	583	14742	3.37153	0.0293556	0.297889	1.53231	SNCA//DPYSL2//NR3C1//SLC38A2
GO:0048599	oocyte development	Biological process	4	30	583	14742	3.37153	0.0293556	0.297889	1.53231	EREG//FOXO3//PDE3A//PDE5A
GO:0090150	establishment of protein localization in membrane	Biological process	4	30	583	14742	3.37153	0.0293556	0.297889	1.53231	LDLRAP1//PIK3R1//CLIP3//WNK3
GO:0070838	divalent metal ion transport	Biological process	17	260	583	14742	1.65334	0.0295834	0.299488	1.52895	PPP3CA//SLC30A9//SLC30A7//SLC30A8//ZDHHC17//MYO5A//STIM2//EDNRA//SNCA//ADRA2A//GNAI2//WFS1//WNK3//CUL5//SLC30A4//SLC39A14//HOMER1
GO:0033674	positive regulation of kinase activity	Biological process	25	423	583	14742	1.49447	0.0299216	0.302194	1.52402	GNAI2//MAP3K1//MAP3K2//NOD2//TAB3//ADRA2A//EREG//WFS1//GOSR2//NRG1//DGKG//EDNRA//DGKZ//WNT7B//ITGB3//ADCY3//PDE5A//ZEB2//VAV3//LRP8//AFAP1L2//SNCA//STK4//SIRT1//MRE11A
GO:0048167	regulation of synaptic plasticity	Biological process	7	76	583	14742	2.32902	0.0303938	0.304042	1.51721	NF1//SNCA//NETO1//SHANK3//MAP1B//CTNND2//YWHAG
GO:0031329	regulation of cellular catabolic process	Biological process	24	403	583	14742	1.50589	0.0304953	0.304042	1.51577	ABL2//ULK2//PIM2//ABHD5//SIRT1//IRS2//ASAP1//CHN1//NF1//EPHA3//PAFAH1B1//RASAL2//SOS1//ERRFI1//N4BP1//CNN3//ARHGEF10//AMPH//VAV3//SNX18//DDIT4//ADRA2A//TIMP3//NCOR1
GO:0016044	cellular membrane organization	Biological process	34	615	583	14742	1.39795	0.0306764	0.304042	1.5132	GDNF//MAGI2//VAV3//AMPH//LRP8//RAB7A//SNX18//IGF2R//LDLRAP1//NLGN3//VAMP3//GOSR2//ATG7//SNCA//ZDHHC15//ABL2//CDH13//ADRBK2//NEDD4//DLG2//STX2//ATP8B1//ATP11A//CLIP3//SEC24D//SEC24A//SAR1B//CBL//SGIP1//AP3D1//PAFAH1B1//PIK3R1//WNK3//GJB1
GO:0007416	synapse assembly	Biological process	6	60	583	14742	2.52864	0.0306984	0.304042	1.51288	SLIT1//EPHB2//NLGN3//SHANK3//CDH2//MAP1B
GO:0014033	neural crest cell differentiation	Biological process	6	60	583	14742	2.52864	0.0306984	0.304042	1.51288	GDNF//ZEB2//OVOL2//EDNRA//NRG1//RDH10
GO:0030815	negative regulation of cAMP metabolic process	Biological process	6	60	583	14742	2.52864	0.0306984	0.304042	1.51288	ADCY3//GNAI2//NPY1R//ADRA2A//GRM3//EDNRA
GO:0030818	negative regulation of cAMP biosynthetic process	Biological process	6	60	583	14742	2.52864	0.0306984	0.304042	1.51288	ADCY3//GNAI2//NPY1R//ADRA2A//GRM3//EDNRA
GO:0043112	receptor metabolic process	Biological process	8	93	583	14742	2.17518	0.0307466	0.304042	1.5122	FAM109A//SNCA//VAMP3//MAGI2//ADRBK2//NEDD4//LDLRAP1//ITGB3
GO:0043542	endothelial cell migration	Biological process	8	93	583	14742	2.17518	0.0307466	0.304042	1.5122	EGR3//BMPR2//ITGB3//NRP1//NR2F2//MYH9//NF1//CDH13
GO:0031047	gene silencing by RNA	Biological process	5	45	583	14742	2.80961	0.0315877	0.309118	1.50048	ZCCHC11//LIN28B//TNRC6A//EIF2C4//TNRC6C
GO:0044344	cellular response to fibroblast growth factor stimulus	Biological process	11	147	583	14742	1.89218	0.031645	0.309118	1.4997	ADCY3//CBL//FGF5//FGF9//FOXO1//FOXO3//PIK3R1//SOS1//SHOC2//RAB14//EGR3
GO:0071774	response to fibroblast growth factor stimulus	Biological process	11	147	583	14742	1.89218	0.031645	0.309118	1.4997	ADCY3//CBL//FGF5//FGF9//FOXO1//FOXO3//PIK3R1//SOS1//SHOC2//RAB14//EGR3
GO:0061024	membrane organization	Biological process	34	617	583	14742	1.39342	0.0319267	0.309118	1.49585	GDNF//MAGI2//VAV3//AMPH//LRP8//RAB7A//SNX18//IGF2R//LDLRAP1//NLGN3//VAMP3//GOSR2//ATG7//SNCA//GJB1//SEC24D//SEC24A//SAR1B//ZDHHC15//ABL2//CDH13//ADRBK2//NEDD4//DLG2//STX2//ATP8B1//ATP11A//CLIP3//CBL//SGIP1//AP3D1//PAFAH1B1//PIK3R1//WNK3
GO:0000082	G1/S transition of mitotic cell cycle	Biological process	14	204	583	14742	1.73534	0.032196	0.309118	1.4922	E2F4//NPAT//DGKZ//FHL1//EIF4E//ORC4//PPP3CA//PSMB2//PSMD9//CUL5//CDC7//CUL3//DBF4//PIM2
GO:0006111	regulation of gluconeogenesis	Biological process	3	18	583	14742	4.21441	0.0322507	0.309118	1.49146	FOXO1//PPARGC1A//NR3C1
GO:0006541	glutamine metabolic process	Biological process	3	18	583	14742	4.21441	0.0322507	0.309118	1.49146	GLUL//LGSN//CTPS
GO:0021522	spinal cord motor neuron differentiation	Biological process	3	18	583	14742	4.21441	0.0322507	0.309118	1.49146	GLI2//NKX2-2//MDGA2
GO:0045736	negative regulation of cyclin-dependent protein kinase activity	Biological process	3	18	583	14742	4.21441	0.0322507	0.309118	1.49146	NR2F2//LATS1//HEXIM1
GO:0045742	positive regulation of epidermal growth factor receptor signaling pathway	Biological process	3	18	583	14742	4.21441	0.0322507	0.309118	1.49146	ADRA2A//EREG//AFAP1L2
GO:0046329	negative regulation of JNK cascade	Biological process	3	18	583	14742	4.21441	0.0322507	0.309118	1.49146	NCOR1//ZMYND11//TAOK3
GO:0030001	metal ion transport	Biological process	33	596	583	14742	1.40009	0.0322876	0.309118	1.49096	KCNA6//KCNK10//KCTD10//KCTD7//SCN1A//SCN1B//SCN2A//SCN3A//SCN9A//SLC4A4//SLC4A7//SLC38A2//SLC38A1//KIAA1919//SLC9A4//PPP3CA//SLC30A9//SLC30A7//SLC30A8//WNK3//NEDD4//ZDHHC17//MYO5A//STIM2//ADRA2A//EDNRA//SNCA//GNAI2//WFS1//CUL5//SLC30A4//SLC39A14//HOMER1
GO:0072006	nephron development	Biological process	7	77	583	14742	2.29877	0.0323403	0.309118	1.49026	COL4A3//NID1//MAGI2//GDNF//BASP1//OSR1//WNT7B
GO:0060627	regulation of vesicle-mediated transport	Biological process	13	185	583	14742	1.77689	0.0323572	0.309118	1.49003	MAGI2//ABL2//CDH13//AMPH//SNCA//CLIP3//ADRA2A//NOTCH1//CBL//LDLRAP1//SGIP1//NRP1//SLC30A8
GO:0006487	protein N-linked glycosylation	Biological process	8	94	583	14742	2.15204	0.032493	0.309118	1.48821	DOLPP1//ALG9//ST8SIA4//LMAN1//SEC24D//SEC24A//SAR1B//EDEM3
GO:0016358	dendrite development	Biological process	8	94	583	14742	2.15204	0.032493	0.309118	1.48821	NEDD4//BCL11A//EPHB2//SHANK3//DCC//MAP1B//NRP1//IGSF9
GO:0030178	negative regulation of Wnt receptor signaling pathway	Biological process	8	94	583	14742	2.15204	0.032493	0.309118	1.48821	CDH2//NOTCH1//STK4//LATS1//DKK2//CTHRC1//FAM123B//FGF9
GO:0009994	oocyte differentiation	Biological process	4	31	583	14742	3.26277	0.0326844	0.310048	1.48566	EREG//FOXO3//PDE3A//PDE5A
GO:0030800	negative regulation of cyclic nucleotide metabolic process	Biological process	6	61	583	14742	2.48719	0.0329545	0.310048	1.48209	ADCY3//GNAI2//NPY1R//ADRA2A//GRM3//EDNRA
GO:0030803	negative regulation of cyclic nucleotide biosynthetic process	Biological process	6	61	583	14742	2.48719	0.0329545	0.310048	1.48209	ADCY3//GNAI2//NPY1R//ADRA2A//GRM3//EDNRA
GO:0030856	regulation of epithelial cell differentiation	Biological process	6	61	583	14742	2.48719	0.0329545	0.310048	1.48209	OSR1//NOTCH1//ERRFI1//OVOL2//NCOA3//GDNF
GO:0031345	negative regulation of cell projection organization	Biological process	6	61	583	14742	2.48719	0.0329545	0.310048	1.48209	DCC//PAFAH1B1//BCL11A//SLIT1//NRP1//RTN4R
GO:0044262	cellular carbohydrate metabolic process	Biological process	30	533	583	14742	1.42325	0.0331883	0.31156	1.47902	NPY1R//IRS2//GK//PPARGC1A//IDH1//NR3C1//ST8SIA4//FUT9//COG2//B3GNT5//DOLPP1//ALG9//GALNT6//SIRT1//FOXO1//GALNT3//C1GALT1//GXYLT1//LMAN1//SEC24D//SEC24A//SAR1B//EDEM3//CHST15//B3GNT1//DDIT4//GPD1L//SYNJ2//SNCA//NCOR1
GO:0030308	negative regulation of cell growth	Biological process	10	130	583	14742	1.94511	0.0334744	0.313324	1.47529	BCL11A//DCC//SLIT1//NRP1//BMPR2//FHL1//SERTAD2//SIRT1//NDRG3//FOXK1
GO:0072511	divalent inorganic cation transport	Biological process	17	264	583	14742	1.62829	0.0335232	0.313324	1.47465	PPP3CA//SLC30A9//SLC30A7//SLC30A8//ZDHHC17//MYO5A//STIM2//EDNRA//SNCA//ADRA2A//GNAI2//WFS1//WNK3//CUL5//SLC30A4//SLC39A14//HOMER1
GO:0031056	regulation of histone modification	Biological process	5	46	583	14742	2.74853	0.0343301	0.319125	1.46433	BCOR//NCOR1//NIPBL//PPARGC1A//SNCA
GO:0019228	regulation of action potential in neuron	Biological process	7	78	583	14742	2.2693	0.0343684	0.319125	1.46384	NF1//ARHGEF10//CDH2//MYO5A//SCN2A//QKI//SCN1A
GO:0048588	developmental cell growth	Biological process	7	78	583	14742	2.2693	0.0343684	0.319125	1.46384	BCL11A//MAP1B//PAFAH1B1//DCC//NLGN3//SLIT1//NRP1
GO:0012501	programmed cell death	Biological process	74	1521	583	14742	1.23024	0.0345642	0.320245	1.46137	IRS2//DCC//EPHA3//FOXO3//GLI2//H1F0//MCL1//MLL//PEG3//PRKCB//PSMB2//PSMD9//SCN2A//MAP2K4//SOS1//TIAM1//FXR1//UNC5C//VAV3//PEG10//KIF1B//GRAMD4//CECR2//ARHGEF3//DDIT4//AVEN//RFFL//UNC5D//HIPK1//BCL2L15//KLLN//FOXO1//GDNF//NR3C1//NRG1//SNCA//PIM2//WNK3//COL4A3//PLAGL2//STK4//WNT7B//LYST//CUL5//CUL3//FOXA1//MAP3K1//JAG2//MNT//WFS1//SIRT1//NOD2//NF1//NOTCH1//PDE5A//CLIP3//CSRNP3//CBL//EDNRA//EGR3//PD…
GO:0021915	neural tube development	Biological process	9	113	583	14742	2.01396	0.0350619	0.324151	1.45516	STK4//OVOL2//FZD3//ZEB2//GLI2//CTHRC1//NF1//NOTCH1//PLXNA2
GO:0030809	negative regulation of nucleotide biosynthetic process	Biological process	6	62	583	14742	2.44708	0.0353153	0.325084	1.45204	ADCY3//GNAI2//NPY1R//ADRA2A//GRM3//EDNRA
GO:0051648	vesicle localization	Biological process	6	62	583	14742	2.44708	0.0353153	0.325084	1.45204	MYO5A//BBS5//PAFAH1B1//SEC24D//SEC24A//SAR1B
GO:0042147	retrograde transport, endosome to Golgi	Biological process	4	32	583	14742	3.16081	0.0362248	0.332022	1.44099	VAMP3//VPS54//SNX6//FAM109A
GO:0060113	inner ear receptor cell differentiation	Biological process	4	32	583	14742	3.16081	0.0362248	0.332022	1.44099	JAG2//NOTCH1//CUX1//CTHRC1
GO:0042692	muscle cell differentiation	Biological process	15	227	583	14742	1.67091	0.0363507	0.332461	1.43949	MYH9//ADAM12//CACNA2D2//NOTCH1//PITX1//PPP3CA//NFATC3//WNT7B//CDH2//NEO1//EREG//NRG1//ATG7//ATG5//QKI
GO:0051347	positive regulation of transferase activity	Biological process	25	432	583	14742	1.46334	0.0370829	0.337474	1.43083	GNAI2//MAP3K1//MAP3K2//NOD2//TAB3//ADRA2A//EREG//WFS1//GOSR2//NRG1//DGKG//EDNRA//DGKZ//WNT7B//ITGB3//MRE11A//ADCY3//PDE5A//ZEB2//VAV3//LRP8//AFAP1L2//SNCA//STK4//SIRT1
GO:0048713	regulation of oligodendrocyte differentiation	Biological process	3	19	583	14742	3.9926	0.0372026	0.337474	1.42943	NKX2-2//NF1//NOTCH1
GO:0007193	inhibition of adenylate cyclase activity by G-protein signaling pathway	Biological process	5	47	583	14742	2.69005	0.0372156	0.337474	1.42928	GRM3//ADRA2A//ADCY3//GNAI2//NPY1R
GO:0043255	regulation of carbohydrate biosynthetic process	Biological process	5	47	583	14742	2.69005	0.0372156	0.337474	1.42928	NR3C1//FOXO1//PPARGC1A//IRS2//SNCA
GO:0072657	protein localization in membrane	Biological process	6	63	583	14742	2.40823	0.0377824	0.341409	1.42271	DLG2//MAGI2//LDLRAP1//PIK3R1//CLIP3//WNK3
GO:0009101	glycoprotein biosynthetic process	Biological process	16	248	583	14742	1.63138	0.0378098	0.341409	1.4224	ST8SIA4//FUT9//COG2//B3GNT5//DOLPP1//ALG9//GALNT6//GALNT3//C1GALT1//GXYLT1//LMAN1//SEC24D//SEC24A//SAR1B//EDEM3//SOAT1
GO:0010627	regulation of intracellular protein kinase cascade	Biological process	29	518	583	14742	1.41565	0.0379814	0.342234	1.42043	WNT7B//MAP3K2//PJA2//AKAP5//NBR1//FOXO1//MID1//TAOK3//NOD2//EDA//PRKCB//PIM2//ZDHHC17//PELI2//PELI1//MIER1//ZMYND11//SIRT1//NF1//CDH2//FGF9//ZEB2//NCOR1//SDCBP//NOTCH1//MAGI2//DCC//EDNRA//GAS6
GO:0001935	endothelial cell proliferation	Biological process	7	80	583	14742	2.21256	0.0386738	0.347005	1.41258	NF1//NR2F2//BMPR2//CDH13//EGR3//ITGB3//NRP1
GO:0060271	cilium morphogenesis	Biological process	7	80	583	14742	2.21256	0.0386738	0.347005	1.41258	E2F4//ONECUT2//TTLL3//BBS5//SEPT7//ASAP1//PARVA
GO:0019538	protein metabolic process	Biological process	159	3554	583	14742	1.13127	0.0393884	0.352676	1.40463	ERO1L//CCNT2//GNAI2//MAP3K1//MAP3K2//NOD2//TAB3//PSMB2//PSMD9//UBE2D1//UBE2V2//TNKS//UBR5//CHFR//NEDD4//HERC3//BCOR//EDNRA//ITGB3//SIRT1//CLIP3//PELI2//LMAN1//NKTR//PPID//ST13//DNAJC16//EDEM3//ADRA2A//EREG//ERRFI1//SNX6//CBL//CUL3//PJA2//MARCH6//FBXW2//DCAF6//MARCH4//KCTD10//EIF4E//EIF4G2//MRPS25//ZFP36L1//FOXO3//QKI//TNRC6A//TNRC6C//CPEB2//EIF2C4//ABL2//ST8SIA4//ATG7//NAGPA//ADRBK2//EPHB2//GMFB/…
GO:0006915	apoptotic process	Biological process	73	1509	583	14742	1.22327	0.0396894	0.354626	1.40132	IRS2//H1F0//CECR2//FOXO1//GDNF//NR3C1//NRG1//MCL1//SNCA//PIM2//AVEN//WNK3//COL4A3//DCC//FOXO3//PLAGL2//STK4//WNT7B//LYST//SOS1//TIAM1//VAV3//ARHGEF3//CUL5//CUL3//FOXA1//MAP3K1//JAG2//MNT//PSMB2//PSMD9//WFS1//SIRT1//NOD2//NF1//NOTCH1//PDE5A//CLIP3//CSRNP3//CBL//EDNRA//EGR3//PDE3A//ATG5//ATG7//RRM2B//BCL11B//OSR1//MGMT//PPARGC1A//CDH13//ZMYND11//EPHA3//GLI2//MLL//PEG3//PRKCB//SCN2A//MAP2K4//FXR1//U…
GO:0016310	phosphorylation	Biological process	62	1256	583	14742	1.24822	0.039813	0.35464	1.39998	CCNT2//GNAI2//MAP3K1//MAP3K2//NOD2//TAB3//EDNRA//ITGB3//SIRT1//CLIP3//PELI2//ADRA2A//EREG//ERRFI1//SNX6//ABL2//ADRBK2//EPHB2//GMFB//MARK1//PRKCB//MAP2K4//STK4//LATS1//PIM2//ICK//TAOK3//WNK3//NF1//YWHAG//PPM1E//AK3//WFS1//GOSR2//NRG1//DGKG//DGKZ//WNT7B//BMPR2//GDF6//TNKS//MRE11A//RAP2B//SNCA//IRS2//ADCY3//SDCBP//PDE5A//ZEB2//TWF1//PIK3R1//VAV3//NR2F2//HEXIM1//LRP8//ULK2//TRPM7//SYNJ2//NRP1//AFAP1L…
GO:0043408	regulation of MAPK cascade	Biological process	18	290	583	14742	1.5695	0.0398874	0.35464	1.39916	WNT7B//MAP3K2//NBR1//FOXO1//MID1//TAOK3//NOD2//NF1//CDH2//FGF9//PELI2//ZEB2//NCOR1//ZMYND11//SDCBP//DCC//EDNRA//GAS6
GO:0006928	cellular component movement	Biological process	52	1029	583	14742	1.27784	0.0400826	0.35464	1.39704	GDNF//ZEB2//OVOL2//CELSR3//MARK1//PAFAH1B1//NR2F2//NAV1//MDGA1//EGR3//SDCBP//CD2AP//KIF1B//MYH9//MYO5A//BMPR2//ITGB3//NRP1//CDH2//EPHA3//CUL3//DGKZ//VAV3//PRPF40A//SCYL3//SRGAP1//CTHRC1//LRP8//PLXNA2//SLIT1//CELF3//JAG2//MAP3K1//UNC5C//ADRA2A//CDH13//IRS2//ONECUT2//NF1//RAP2B//MAGI2//SCAI//LYST//MAP1B//CD47//GAS6//PIK3R1//PIK3R2//SOS1//SLC7A11//EDNRA//ABL2
GO:0009749	response to glucose stimulus	Biological process	8	98	583	14742	2.0642	0.0401517	0.35464	1.3963	ADRA2A//PPP3CA//COL4A3//GLUL//PCSK1//IRS2//SLC30A8//ILDR2
GO:0051650	establishment of vesicle localization	Biological process	5	48	583	14742	2.63401	0.0402454	0.35464	1.39528	MYO5A//BBS5//SEC24D//SEC24A//SAR1B
GO:0042552	myelination	Biological process	6	64	583	14742	2.3706	0.0403567	0.35464	1.39408	NF1//ARHGEF10//CDH2//MYO5A//SCN2A//QKI
GO:0045980	negative regulation of nucleotide metabolic process	Biological process	6	64	583	14742	2.3706	0.0403567	0.35464	1.39408	ADCY3//GNAI2//NPY1R//ADRA2A//GRM3//EDNRA
GO:0048675	axon extension	Biological process	6	64	583	14742	2.3706	0.0403567	0.35464	1.39408	BCL11A//MAP1B//PAFAH1B1//SLIT1//NRP1//NLGN3
GO:0031401	positive regulation of protein modification process	Biological process	22	373	583	14742	1.49143	0.040625	0.356263	1.39121	EDNRA//ITGB3//SIRT1//CLIP3//PELI2//WNK3//BMPR2//GDF6//NCOR1//NIPBL//UBE2D1//WFS1//PELI1//MRE11A//RAP2B//SNCA//LATS1//PPARGC1A//NRP1//PSMB2//PSMD9//ATG7
GO:0008543	fibroblast growth factor receptor signaling pathway	Biological process	10	135	583	14742	1.87307	0.0416783	0.364002	1.38009	ADCY3//CBL//FGF5//FGF9//FOXO1//FOXO3//PIK3R1//SOS1//SHOC2//RAB14
GO:0090092	regulation of transmembrane receptor protein serine/threonine kinase signaling pathway	Biological process	10	135	583	14742	1.87307	0.0416783	0.364002	1.38009	BMPR2//GDF6//NR3C1//ONECUT2//PEG10//SIRT1//SNX6//NOTCH1//SOSTDC1//MAGI2
GO:0022612	gland morphogenesis	Biological process	8	99	583	14742	2.04335	0.0422391	0.366834	1.37429	GLI2//NR3C1//EDA//NRP1//FOXA1//NOTCH1//NCOA3//PLAG1
GO:0006898	receptor-mediated endocytosis	Biological process	9	117	583	14742	1.94511	0.0423366	0.366834	1.37328	MAGI2//ADRBK2//NEDD4//SNCA//LDLRAP1//CBL//SGIP1//IGF2R//NLGN3
GO:0009719	response to endogenous stimulus	Biological process	44	853	583	14742	1.30434	0.042488	0.366834	1.37173	DCC//DPYSL2//PPP3CA//EIF4E//FGF5//FGF9//FOXO1//FOXO3//PIK3R1//PIK3R2//SOS1//IRS2//ADCY3//CBL//SHOC2//RAB14//TIMP3//LATS1//KDM3A//LANCL2//PSMB2//DNMT3A//NOTCH1//FOXA1//MAP1B//NPY1R//NR2F2//NR3C1//UCP3//ABCC5//SIRT1//SLC29A2//ADRA2A//PDE5A//NR3C2//EREG//PCSK1//EGR3//PRKCB//BCKDHB//CDH13//GNG12//PDE3A//SNCA
GO:0001881	receptor recycling	Biological process	3	20	583	14742	3.79297	0.042519	0.366834	1.37142	SNCA//VAMP3//FAM109A
GO:0042491	auditory receptor cell differentiation	Biological process	3	20	583	14742	3.79297	0.042519	0.366834	1.37142	JAG2//NOTCH1//CUX1
GO:0048665	neuron fate specification	Biological process	3	20	583	14742	3.79297	0.042519	0.366834	1.37142	GLI2//FOXA1//NKX2-2
GO:0007229	integrin-mediated signaling pathway	Biological process	6	65	583	14742	2.33413	0.0430395	0.369287	1.36613	CD47//ITGB3//ITGB8//ADAM11//MYH9//VAV3
GO:0032412	regulation of ion transmembrane transporter activity	Biological process	6	65	583	14742	2.33413	0.0430395	0.369287	1.36613	MYO5A//STIM2//WNK3//ADRA2A//GNAI2//HOMER1
GO:0044093	positive regulation of molecular function	Biological process	55	1102	583	14742	1.26203	0.0430633	0.369287	1.36589	GNAI2//MAP3K1//MAP3K2//NOD2//TAB3//ADRA2A//EREG//COL4A3//SNCA//WFS1//GOSR2//NRG1//ADCY3//EDNRA//DGKG//DGKZ//HOMER1//WNT7B//CTHRC1//ITGB3//STIM2//NF1//RASAL2//SOS1//ERRFI1//MLL//WNK3//MAGI2//GDNF//MRE11A//NCOA3//GMFB//DBF4//SIRT1//PDE5A//ZEB2//AMPH//VAV3//SNX18//LRP8//ABHD5//FOXA1//NKX2-2//TAF12//PPARGC1A//EDA//PRKCB//ABL2//PSMB2//PSMD9//UBE2D1//NRP1//AFAP1L2//STK4//SHANK3
GO:0006914	autophagy	Biological process	7	82	583	14742	2.1586	0.043318	0.370118	1.36333	ATG5//ABL2//ULK2//PIM2//NBR1//SIRT1//ATG7
GO:0031623	receptor internalization	Biological process	5	49	583	14742	2.58025	0.0434206	0.370118	1.3623	MAGI2//ADRBK2//NEDD4//SNCA//LDLRAP1
GO:0048663	neuron fate commitment	Biological process	5	49	583	14742	2.58025	0.0434206	0.370118	1.3623	JAG2//NOTCH1//GLI2//FOXA1//NKX2-2
GO:0032844	regulation of homeostatic process	Biological process	14	213	583	14742	1.66202	0.0437729	0.370724	1.35879	SCN1B//CDH2//TNKS//ITGB3//NF1//FOXO3//EDNRA//SNCA//SLC30A4//AP3D1//SLC30A8//ADRA2A//WNK3//SGIP1
GO:0071495	cellular response to endogenous stimulus	Biological process	29	525	583	14742	1.39678	0.0438899	0.370724	1.35764	EIF4E//FGF5//FGF9//FOXO1//FOXO3//PIK3R1//PIK3R2//SOS1//IRS2//ADCY3//CBL//SHOC2//RAB14//LATS1//KDM3A//LANCL2//DNMT3A//SLC29A2//ADRA2A//UCP3//NR3C2//NR3C1//EGR3//PRKCB//SIRT1//CDH13//GNG12//PDE3A//SNCA
GO:0001678	cellular glucose homeostasis	Biological process	4	34	583	14742	2.97488	0.0439434	0.370724	1.35711	ADRA2A//PPP3CA//PPARGC1A//SIRT1
GO:0048259	regulation of receptor-mediated endocytosis	Biological process	4	34	583	14742	2.97488	0.0439434	0.370724	1.35711	MAGI2//CBL//LDLRAP1//SGIP1
GO:0060078	regulation of postsynaptic membrane potential	Biological process	4	34	583	14742	2.97488	0.0439434	0.370724	1.35711	PPP3CA//SNCA//NLGN3//SHANK3
GO:0071363	cellular response to growth factor stimulus	Biological process	16	253	583	14742	1.59914	0.0440137	0.370724	1.35641	ADCY3//CBL//FGF5//FGF9//FOXO1//FOXO3//PIK3R1//SOS1//SHOC2//RAB14//NEDD4//ITGB3//PRKCB//NRP1//EGR3//PDE3A
GO:0035148	tube formation	Biological process	8	100	583	14742	2.02292	0.044397	0.373215	1.35265	STK4//OVOL2//FZD3//ZEB2//EDA//GDNF//OSR1//CTHRC1
GO:0007517	muscle organ development	Biological process	18	294	583	14742	1.54815	0.0445793	0.37401	1.35087	NF1//NR2F2//MYH9//ADAM12//CACNA2D2//PITX1//NOTCH1//MKL2//PPP3CA//FGF9//NRG1//BASP1//EGR3//FHL1//SGCB//FXR1//SIRT1//FOXK1
GO:0031344	regulation of cell projection organization	Biological process	14	214	583	14742	1.65425	0.0452194	0.378635	1.34468	SSH2//ABL2//DCC//EPHA3//BCL11A//PAFAH1B1//MAP1B//NEDD4//SLIT1//NRP1//CDH2//CHN1//RTN4R//TIAM1
GO:0030278	regulation of ossification	Biological process	10	137	583	14742	1.84573	0.045314	0.378683	1.34377	NBR1//TXLNG//BMPR2//OSR1//BCOR//NOTCH1//DLX5//WNT7B//NIPBL//PBX1
GO:0007254	JNK cascade	Biological process	11	156	583	14742	1.78302	0.0455814	0.380028	1.34121	WNT7B//MAP3K2//ZEB2//NCOR1//ZMYND11//TAOK3//SDCBP//NOD2//CRKL//MAP2K4//TAB3
GO:0043473	pigmentation	Biological process	7	83	583	14742	2.13259	0.0457693	0.380028	1.33943	AP3D1//MYO5A//MREG//BBS5//LYST//EDA//NF1
GO:0040014	regulation of multicellular organism growth	Biological process	6	66	583	14742	2.29877	0.0458316	0.380028	1.33884	SGIP1//NIPBL//CHD7//NPY1R//CACNA2D2//NCOR1
GO:0060021	palate development	Biological process	6	66	583	14742	2.29877	0.0458316	0.380028	1.33884	DLX5//EPHB2//FOXF2//BCOR//CHD7//OSR1
GO:0021953	central nervous system neuron differentiation	Biological process	8	101	583	14742	2.00289	0.0466263	0.385867	1.33137	NKX2-2//MDGA2//MDGA1//PAFAH1B1//BCL11B//SHANK3//GLI2//ATG7
GO:0048645	organ formation	Biological process	5	50	583	14742	2.52864	0.0467421	0.386075	1.33029	GDNF//HOXA11//NOTCH1//RDH10//GLI2
GO:0030324	lung development	Biological process	10	138	583	14742	1.83235	0.04721	0.389185	1.32597	BMPR2//ERRFI1//WNT7B//RDH10//FOXA1//FGF9//CUX1//GLI2//NR3C1//NOTCH1
GO:0031667	response to nutrient levels	Biological process	20	338	583	14742	1.49624	0.0479007	0.391422	1.31966	ATG5//BCKDHB//GNAI2//UCP3//BMPR2//SIRT1//TNRC6A//NBR1//MAP1B//SLC30A4//ULK2//ATG7//PPARGC1A//MGMT//TIMP3//ABL2//EPHA3//WNT7B//OSR1//PCSK1
GO:0010676	positive regulation of cellular carbohydrate metabolic process	Biological process	4	35	583	14742	2.88988	0.0481216	0.391422	1.31766	IRS2//FOXO1//PPARGC1A//SNCA
GO:0045682	regulation of epidermis development	Biological process	4	35	583	14742	2.88988	0.0481216	0.391422	1.31766	ERRFI1//OVOL2//NOTCH1//NCOA3
GO:0045913	positive regulation of carbohydrate metabolic process	Biological process	4	35	583	14742	2.88988	0.0481216	0.391422	1.31766	IRS2//FOXO1//PPARGC1A//SNCA
GO:0050807	regulation of synapse organization	Biological process	4	35	583	14742	2.88988	0.0481216	0.391422	1.31766	SHANK3//SLIT1//EPHB2//NLGN3
GO:0007398	ectoderm development	Biological process	3	21	583	14742	3.61235	0.0481933	0.391422	1.31701	EDA//STX2//ZBTB7B
GO:0046785	microtubule polymerization	Biological process	3	21	583	14742	3.61235	0.0481933	0.391422	1.31701	SNCA//CLIP3//MAP1B
GO:0080135	regulation of cellular response to stress	Biological process	15	236	583	14742	1.60719	0.0482733	0.391422	1.31629	UBE2V2//WNT7B//MAP3K2//SIRT1//NBR1//FOXO1//MID1//TAOK3//NOD2//ZEB2//MGMT//NCOR1//ZMYND11//SDCBP//NUAK1
GO:0030534	adult behavior	Biological process	7	84	583	14742	2.1072	0.0483079	0.391422	1.31598	SCN1A//ATG7//CHD7//ABAT//GDNF//PAFAH1B1//SNCA
GO:0001508	regulation of action potential	Biological process	8	102	583	14742	1.98325	0.0489275	0.394942	1.31045	SCN1A//NF1//ARHGEF10//CDH2//MYO5A//SCN2A//QKI//SCN1B
GO:0009746	response to hexose stimulus	Biological process	8	102	583	14742	1.98325	0.0489275	0.394942	1.31045	COL4A3//GLUL//PCSK1//IRS2//SLC30A8//ILDR2//ADRA2A//PPP3CA
GO:0046058	cAMP metabolic process	Biological process	10	139	583	14742	1.81917	0.0491586	0.395409	1.3084	ADCY3//PDE3A//PDE4D//EDNRA//GNAI2//NPY1R//ADRA2A//GRM3//AKAP5//NF1
GO:0000209	protein polyubiquitination	Biological process	11	158	583	14742	1.76045	0.049171	0.395409	1.30829	NEDD4//UBE2D1//MARCH6//ZNRF1//MAP3K1//PSMB2//PSMD9//UBE2V2//TNKS//UBR5//CHFR

## Sheet: GO_CC
#Column "GO.ID" stands for the ID of gene ontology term
#Column "Term" stands for the name of gene ontology term
#Column "Ontology" stands for the ontology of GOID belongs to
#Column "Count" stands for the number of DE genes associated with the listed GOID
#Column "Pop.Hits" stands for the number of background population genes associated with the listed GOID
#Column "List.Total" stands for the total number of DE genes
#Column "Pop.Total" stands for the total number of background population genes
#Column "Fold.Enrichment" stands for the Fold Enrichment value of the GOID, it equals (Count/Pop.Hits)/(List.Total/Pop.Total)
#Column "Pvalue" stands for the significance testing value of the GOID
#Column "FDR" stands for the false discovery rate of the GOID, using Benjamini & Hochberg (1995) method
#Column "Enrichment.Score" stands for the Enrichment Score value of the GOID, it equals (-log10(Pvalue))
#Column "GENES" stands for the DE genes associated with the GOID
GO.ID	Term	Ontology	Count	Pop.Hits	List.Total	Pop.Total	Fold.Enrichment	Pvalue	FDR	Enrichment.Score	GENES
GO:0044424	intracellular part	Cellular component	515	11860	650	16875	1.12733	9.4178e-08	4.74592e-05	7.02605	TBL1X//NRIP1//NCOR1//WDR5//KAT7//TAF12//RND3//CUX1//GALNT3//LMAN1//ST8SIA4//TNKS//AP3D1//GOSR2//PJA2//SEC24D//COG5//SEC24A//B3GNT1//GALNT6//COG2//ZDHHC17//B3GAT1//TRAPPC3//CHST15//RAB14//C1GALT1//MARCH4//B3GNT5//SLC30A7//NEDD4//RNF2//PPP2R5E//SHOC2//TOP1//BAZ1A//PBRM1//MRE11A//PAFAH1B1//GNA12//GNAI2//GNG12//PSMB2//DNMT3A//CBX1//PPP1R12A//SEPT7//MAF//WDR82//ESCO1//H1F0//ARID1A//SIRT1//MECP2//ORC4/…
GO:0005622	intracellular	Cellular component	524	12155	650	16875	1.1192	1.7041e-07	4.74592e-05	6.7685	TBL1X//NRIP1//NCOR1//WDR5//KAT7//TAF12//RND3//CUX1//GALNT3//LMAN1//ST8SIA4//TNKS//AP3D1//GOSR2//PJA2//SEC24D//COG5//SEC24A//B3GNT1//GALNT6//COG2//ZDHHC17//B3GAT1//TRAPPC3//CHST15//RAB14//C1GALT1//MARCH4//B3GNT5//SLC30A7//NEDD4//RNF2//PPP2R5E//SHOC2//TOP1//BAZ1A//PBRM1//MRE11A//PAFAH1B1//GNA12//GNAI2//GNG12//PSMB2//DNMT3A//CBX1//PPP1R12A//SEPT7//MAF//WDR82//ESCO1//H1F0//ARID1A//SIRT1//MECP2//ORC4/…
GO:0044464	cell part	Cellular component	590	14351	650	16875	1.06733	6.65341e-06	0.000943774	5.17696	ADCY3//ADRA2A//BMPR2//DAGLA//CBL//CD47//SEPT7//CDH2//CDH11//CDH13//DGKG//DCC//DLG2//DSC2//DSC3//EDA//EDNRA//EFNA3//CELSR3//EPHA3//EPHB2//EREG//FHL1//FLT3LG//GABRA1//GJB1//GNA12//GNAI2//GRIA2//GRM3//NRG1//SLC29A2//HTR1F//ITGB3//ITGB8//JAG2//KCNA6//MAP1B//MARK1//MARK3//ADAM11//MYH9//NEDD4//NEO1//NFATC3//NOTCH1//NPY1R//ATP8B1//PIK3R1//PLXNA2//PRKCB//RPE65//SCN1A//SDCBP//SLC6A6//SNCA//TAP2//TIAM1//EZ…
GO:0005623	cell	Cellular component	590	14352	650	16875	1.06726	6.77755e-06	0.000943774	5.16893	ADCY3//ADRA2A//BMPR2//DAGLA//CBL//CD47//SEPT7//CDH2//CDH11//CDH13//DGKG//DCC//DLG2//DSC2//DSC3//EDA//EDNRA//EFNA3//CELSR3//EPHA3//EPHB2//EREG//FHL1//FLT3LG//GABRA1//GJB1//GNA12//GNAI2//GRIA2//GRM3//NRG1//SLC29A2//HTR1F//ITGB3//ITGB8//JAG2//KCNA6//MAP1B//MARK1//MARK3//ADAM11//MYH9//NEDD4//NEO1//NFATC3//NOTCH1//NPY1R//ATP8B1//PIK3R1//PLXNA2//PRKCB//RPE65//SCN1A//SDCBP//SLC6A6//SNCA//TAP2//TIAM1//EZ…
GO:0043229	intracellular organelle	Cellular component	439	10221	650	16875	1.11507	0.000104854	0.0100224	3.97942	TBL1X//NRIP1//NCOR1//WDR5//KAT7//TAF12//RND3//CUX1//GALNT3//LMAN1//ST8SIA4//TNKS//AP3D1//GOSR2//PJA2//SEC24D//COG5//SEC24A//B3GNT1//GALNT6//COG2//ZDHHC17//B3GAT1//TRAPPC3//CHST15//RAB14//C1GALT1//MARCH4//B3GNT5//SLC30A7//TOP1//BAZ1A//PBRM1//MRE11A//PAFAH1B1//DNMT3A//CBX1//PPP1R12A//SEPT7//MAF//NEDD4//WDR82//ESCO1//H1F0//ARID1A//SIRT1//MECP2//ORC4//LATS1//CEP44//EIF4E//TNRC6A//EDC3//EIF2C4//NOTCH1…
GO:0001518	voltage-gated sodium channel complex	Cellular component	5	14	650	16875	9.27198	0.000125105	0.0100224	3.90272	SCN1A//SCN1B//SCN2A//SCN3A//SCN9A
GO:0043226	organelle	Cellular component	439	10236	650	16875	1.11343	0.000125955	0.0100224	3.89978	TBL1X//NRIP1//NCOR1//WDR5//KAT7//TAF12//RND3//CUX1//GALNT3//LMAN1//ST8SIA4//TNKS//AP3D1//GOSR2//PJA2//SEC24D//COG5//SEC24A//B3GNT1//GALNT6//COG2//ZDHHC17//B3GAT1//TRAPPC3//CHST15//RAB14//C1GALT1//MARCH4//B3GNT5//SLC30A7//TOP1//BAZ1A//PBRM1//MRE11A//PAFAH1B1//DNMT3A//CBX1//PPP1R12A//SEPT7//MAF//NEDD4//WDR82//ESCO1//H1F0//ARID1A//SIRT1//MECP2//ORC4//LATS1//CEP44//EIF4E//TNRC6A//EDC3//EIF2C4//NOTCH1…
GO:0043228	non-membrane-bounded organelle	Cellular component	149	2986	650	16875	1.29547	0.000329425	0.0176028	3.48224	TOP1//BAZ1A//PBRM1//MRE11A//PAFAH1B1//TNKS//DNMT3A//CBX1//PPP1R12A//SEPT7//MAF//NEDD4//WDR82//ESCO1//H1F0//ARID1A//NCOR1//SIRT1//MECP2//ORC4//LATS1//CEP44//EIF4E//TNRC6A//EDC3//EIF2C4//MYO5A//UPP2//MYH9//RNF2//SH3PXD2A//MRPS25//PURB//SETD1B//CECR2//FRG1//SLC29A2//HOXA11//ILF3//AFF3//NFATC3//PITX1//TAF4B//EZR//ZNF192//FXR1//RNMT//N4BP1//UTP14C//ZEB2//PPM1E//ZCCHC11//CD2AP//RRN3//GZF1//C15ORF29//AL…
GO:0043232	intracellular non-membrane-bounded organelle	Cellular component	149	2986	650	16875	1.29547	0.000329425	0.0176028	3.48224	TOP1//BAZ1A//PBRM1//MRE11A//PAFAH1B1//TNKS//DNMT3A//CBX1//PPP1R12A//SEPT7//MAF//NEDD4//WDR82//ESCO1//H1F0//ARID1A//NCOR1//SIRT1//MECP2//ORC4//LATS1//CEP44//EIF4E//TNRC6A//EDC3//EIF2C4//MYO5A//UPP2//MYH9//RNF2//SH3PXD2A//MRPS25//PURB//SETD1B//CECR2//FRG1//SLC29A2//HOXA11//ILF3//AFF3//NFATC3//PITX1//TAF4B//EZR//ZNF192//FXR1//RNMT//N4BP1//UTP14C//ZEB2//PPM1E//ZCCHC11//CD2AP//RRN3//GZF1//C15ORF29//AL…
GO:0034706	sodium channel complex	Cellular component	5	17	650	16875	7.63575	0.000351212	0.0176028	3.45443	SCN1A//SCN1B//SCN2A//SCN3A//SCN9A
GO:0005634	nucleus	Cellular component	264	5793	650	16875	1.18313	0.000385524	0.0176028	3.41395	TBL1X//NRIP1//NCOR1//WDR5//KAT7//TAF12//TOP1//BAZ1A//PBRM1//MRE11A//TNKS//H1F0//ARID1A//SIRT1//RNF2//CBX1//PAFAH1B1//IGF2R//IPO7//XPO7//TMEM48//CCNT2//E2F4//FOXO1//FOXO3//NR6A1//NR3C1//HNRNPC//MCL1//MGMT//NR3C2//NKX2-2//NOTCH1//ORC4//POU2F1//PSMB2//PSMD9//TAF4B//UBE2D1//NCOA3//CDC7//RNMT//NCOR2//MED13//DBF4//RCOR1//ANKRD28//UBN1//RRM2B//REV1//RRN3//GZF1//ALS2CR8//CHD9//HNRNPA3//PURB//PPARGC1A//FO…
GO:0014069	postsynaptic density	Cellular component	12	100	650	16875	3.11538	0.000456861	0.0176028	3.34022	CNN3//CTNND2//DLG2//NR3C1//GRM3//MAP1B//HOMER1//MAGI2//PJA2//LIN7C//NETO1//SHANK3
GO:0044327	dendritic spine head	Cellular component	12	100	650	16875	3.11538	0.000456861	0.0176028	3.34022	CNN3//CTNND2//DLG2//NR3C1//GRM3//MAP1B//HOMER1//MAGI2//PJA2//LIN7C//NETO1//SHANK3
GO:0031519	PcG protein complex	Cellular component	7	37	650	16875	4.91164	0.000457355	0.0176028	3.33975	SIRT1//AEBP2//RNF2//PHC3//PCGF6//PCGF3//BCOR
GO:0043005	neuron projection	Cellular component	37	537	650	16875	1.78878	0.000474044	0.0176028	3.32418	NRP1//LDLRAP1//CNN3//CTNND2//DLG2//NR3C1//GRM3//MAP1B//HOMER1//MAGI2//PJA2//LIN7C//NETO1//SHANK3//DPYSL2//EPHB2//NF1//NPY1R//SCN1A//SCN2A//SNCA//FZD3//LRRTM1//BMPR2//PCSK1//WFS1//IGSF9//AQP11//MYO5A//PAFAH1B1//BASP1//DCC//AMPH//SEPT7//SYNJ2//BSN//CDH13
GO:0043234	protein complex	Cellular component	151	3103	650	16875	1.26336	0.00091564	0.0288379	3.03828	TBL1X//NRIP1//NCOR1//WDR5//KAT7//TAF12//NEDD4//RNF2//PPP2R5E//SHOC2//PAFAH1B1//GNA12//GNAI2//GNG12//PSMB2//PPP1R12A//SEPT7//ORC4//SCN1A//SCN1B//SCN2A//SCN3A//SCN9A//MYO5A//UPP2//SH3PXD2A//PLXNA2//NRP1//NOTCH1//ITGB3//ITGB8//MYH9//TNKS//IPO7//XPO7//TMEM48//PURB//PPARGC1A//FOXN3//E2F4//FOXF2//FOXO1//FOXO3//NR6A1//FOXA1//HOXA11//FOXK2//PBX1//PITX1//POU2F1//TCF7//FOXJ3//NAA15//FOXP4//FOXK1//TAF4B//SI…
GO:0044428	nuclear part	Cellular component	120	2376	650	16875	1.31119	0.000923803	0.0288379	3.03442	TBL1X//NRIP1//NCOR1//WDR5//KAT7//TAF12//TOP1//BAZ1A//PBRM1//MRE11A//TNKS//H1F0//ARID1A//SIRT1//RNF2//PAFAH1B1//IGF2R//IPO7//XPO7//TMEM48//CCNT2//E2F4//FOXO1//FOXO3//NR6A1//NR3C1//HNRNPC//MCL1//MGMT//NR3C2//NKX2-2//NOTCH1//ORC4//POU2F1//PSMB2//PSMD9//TAF4B//UBE2D1//NCOA3//CDC7//RNMT//NCOR2//MED13//DBF4//CBX1//RCOR1//ANKRD28//UBN1//RRM2B//REV1//RRN3//GZF1//ALS2CR8//CHD9//HNRNPA3//PURB//PPARGC1A//FO…
GO:0005856	cytoskeleton	Cellular component	91	1714	650	16875	1.37835	0.000938435	0.0288379	3.0276	PAFAH1B1//TNKS//LATS1//CEP44//MYO5A//UPP2//SEPT7//MYH9//SH3PXD2A//GNAI2//PPP1R12A//ARHGEF10//ACTR1A//C9ORF86//DCTN5//PLEKHA7//MZT1//PDE4D//SPAST//EVI5//PTPN20A//MID1//CBX1//CUL3//MAP1B//KIF1B//TTLL3//EML4//NAV1//RANBP9//TBL1X//NCOR1//SS18//SYNJ2//NRP1//LDLRAP1//EZR//GNG12//BBS5//CNN3//CTNND2//DLG2//NR3C1//GRM3//HOMER1//MAGI2//PJA2//LIN7C//NETO1//SHANK3//ABL2//AMPH//PFN2//TWF1//SNCA//CORO2A//ACTL7…
GO:0044451	nucleoplasm part	Cellular component	48	782	650	16875	1.59355	0.0009837	0.0288379	3.00714	TBL1X//NRIP1//NCOR1//WDR5//KAT7//TAF12//PPARGC1A//FOXN3//E2F4//FOXF2//FOXO1//FOXO3//NR6A1//FOXA1//HOXA11//FOXK2//PBX1//PITX1//POU2F1//TCF7//FOXJ3//NAA15//FOXP4//FOXK1//TAF4B//FRG1//NPAT//MED13//RNF2//NCOR2//BCL11A//N4BP1//SIRT1//UBN1//CHFR//BASP1//SETD1B//PRPF40A//ARID4A//CORO2A//RCOR1//PHF12//MIER1//INTS6//INTS2//MLL//WDR82//AEBP2
GO:0031981	nuclear lumen	Cellular component	103	2009	650	16875	1.33103	0.00137892	0.0384029	2.86046	TBL1X//NRIP1//NCOR1//WDR5//KAT7//TAF12//TOP1//BAZ1A//PBRM1//MRE11A//TNKS//H1F0//ARID1A//SIRT1//RNF2//CCNT2//E2F4//FOXO1//FOXO3//NR6A1//NR3C1//HNRNPC//MCL1//MGMT//NR3C2//NKX2-2//NOTCH1//ORC4//POU2F1//PSMB2//PSMD9//TAF4B//UBE2D1//NCOA3//CDC7//RNMT//NCOR2//MED13//DBF4//CBX1//RCOR1//ANKRD28//UBN1//RRM2B//REV1//RRN3//GZF1//ALS2CR8//CHD9//HNRNPA3//PURB//PPARGC1A//FOXN3//FOXF2//FOXA1//HOXA11//FOXK2//PBX…
GO:0030054	cell junction	Cellular component	42	678	650	16875	1.60824	0.00168989	0.0448224	2.77214	CDH2//DSC3//STX2//TWF1//TIAM1//PDZD2//LIN7C//CTNND2//SDCBP//EPB41L5//WNK3//ARHGAP24//PLEKHA7//DSC2//MYH9//SSX2IP//CALB2//GJB1//CLDN10//MAGI2//UBN1//EZR//PARVA//LMLN//SCN1A//SCN2A//AMPH//DLG2//GABRA1//GRIA2//SNCA//BSN//VAMP3//HOMER1//SH3PXD2A//PJA2//SV2B//IGSF9//NETO1//ZNRF1//SHANK3//SYT2
GO:0017053	transcriptional repressor complex	Cellular component	8	59	650	16875	3.52021	0.00181609	0.0448725	2.74086	ARID4A//TBL1X//CORO2A//NCOR1//NCOR2//RCOR1//PHF12//MIER1
GO:0044463	cell projection part	Cellular component	36	559	650	16875	1.67194	0.0018529	0.0448725	2.73215	EFHC1//NRP1//LDLRAP1//EZR//BBS5//CNN3//CTNND2//DLG2//NR3C1//GRM3//MAP1B//HOMER1//MAGI2//PJA2//LIN7C//NETO1//SHANK3//DPYSL2//MYO5A//PAFAH1B1//SNCA//BASP1//LRRTM1//GNA12//ATP8B1//DCC//TWF1//SYNJ2//FZD3//SCN1A//SCN2A//SEPT7//TTLL3//AMPH//PCSK1//BSN
GO:0005654	nucleoplasm	Cellular component	76	1421	650	16875	1.38851	0.00207919	0.0472776	2.68211	TBL1X//NRIP1//NCOR1//WDR5//KAT7//TAF12//PPARGC1A//FOXN3//E2F4//FOXF2//FOXO1//FOXO3//NR6A1//FOXA1//HOXA11//FOXK2//PBX1//PITX1//POU2F1//TCF7//FOXJ3//NAA15//FOXP4//FOXK1//TAF4B//FRG1//NPAT//MED13//RNF2//NCOR2//BCL11A//N4BP1//SIRT1//UBN1//CHFR//BASP1//SETD1B//PRPF40A//ARID4A//CORO2A//RCOR1//PHF12//MIER1//INTS6//INTS2//MLL//WDR82//AEBP2//CCNT2//NR3C1//H1F0//HNRNPC//MCL1//MGMT//NR3C2//MRE11A//NKX2-2//N…
GO:0030424	axon	Cellular component	19	237	650	16875	2.0813	0.00212198	0.0472776	2.67326	NRP1//LDLRAP1//PAFAH1B1//SCN1A//SCN2A//DPYSL2//AMPH//SEPT7//PCSK1//SYNJ2//DLG2//EPHB2//GRM3//MAP1B//NF1//NPY1R//SNCA//FZD3//LRRTM1
GO:0033267	axon part	Cellular component	11	107	650	16875	2.66894	0.0027628	0.0591876	2.55865	NRP1//LDLRAP1//SCN1A//SCN2A//DPYSL2//AMPH//SEPT7//PCSK1//SYNJ2//DLG2//PAFAH1B1
GO:0030426	growth cone	Cellular component	9	78	650	16875	2.99556	0.00300976	0.0620902	2.52147	DCC//DPYSL2//MAP1B//MYO5A//PAFAH1B1//SNCA//NRP1//BASP1//LRRTM1
GO:0030427	site of polarized growth	Cellular component	9	79	650	16875	2.95764	0.0032836	0.0653201	2.48365	DPYSL2//MAP1B//MYO5A//PAFAH1B1//SNCA//NRP1//BASP1//LRRTM1//DCC
GO:0042995	cell projection	Cellular component	59	1073	650	16875	1.42752	0.00361472	0.0694275	2.44193	MYH9//MYO5A//EZR//CD2AP//TRPM7//EFHC1//NRP1//LDLRAP1//SEPT7//GLI2//TTLL3//PDZD7//BBS5//CNN3//CTNND2//DLG2//NR3C1//GRM3//MAP1B//HOMER1//MAGI2//PJA2//LIN7C//NETO1//SHANK3//CDH2//DGKZ//SLC39A14//PARVA//SCYL3//RAPH1//TWF1//DPYSL2//EPHB2//NF1//NPY1R//SCN1A//SCN2A//SNCA//FZD3//LRRTM1//BMPR2//PCSK1//WFS1//IGSF9//AQP11//PAFAH1B1//BASP1//GNA12//ATP8B1//SLC4A7//DCC//SYNJ2//CDH13//AMPH//BSN//SH3PXD2A//ARHGA…
GO:0044422	organelle part	Cellular component	263	6001	650	16875	1.13779	0.00465783	0.0864804	2.33182	TBL1X//NRIP1//NCOR1//WDR5//KAT7//TAF12//RND3//CUX1//GALNT3//LMAN1//ST8SIA4//TNKS//AP3D1//GOSR2//PJA2//SEC24D//COG5//SEC24A//B3GNT1//GALNT6//COG2//ZDHHC17//B3GAT1//TRAPPC3//CHST15//RAB14//C1GALT1//MARCH4//B3GNT5//SLC30A7//TOP1//BAZ1A//PBRM1//MRE11A//PAFAH1B1//DNMT3A//CBX1//PPP1R12A//SEPT7//MAF//NEDD4//WDR82//ESCO1//H1F0//ARID1A//SIRT1//MECP2//ORC4//LATS1//CEP44//MYO5A//UPP2//MYH9//RNF2//SH3PXD2A//…
GO:0005626	insoluble fraction	Cellular component	50	891	650	16875	1.45688	0.004879	0.08757	2.31167	TOMM40//ADCY3//CDH2//DLG2//DSC3//EDA//FOXO3//GALNT3//GLI2//GNAI2//IGF2R//JAG2//MAP3K1//NEDD4//ATP8B1//SCN1A//SCN2A//CUL5//PSTPIP2//ABCC5//CKAP4//MMD//ERO1L//RAB14//AVEN//RDH10//STX2//LMAN1//PPP3CA//RPE65//SOAT1//TNKS//IRS2//VAMP3//CLCC1//SLC7A11//CLIP3//ABAT//SEPT7//CTNND2//DPYSL2//NR3C1//SNCA//BSN//MAGI2//LIN7C//PAFAH1B1//PDE3A//PDE4D//SYNJ2
GO:0019717	synaptosome	Cellular component	10	101	650	16875	2.57045	0.00552811	0.08757	2.25742	ABAT//SEPT7//CTNND2//DPYSL2//NR3C1//SNCA//BSN//VAMP3//MAGI2//LIN7C
GO:0005911	cell-cell junction	Cellular component	19	260	650	16875	1.89719	0.00583495	0.08757	2.23396	CDH2//DSC2//MYH9//SSX2IP//PLEKHA7//CALB2//GJB1//CLDN10//MAGI2//UBN1//LIN7C//WNK3//SCN1A//SCN2A//DSC3//STX2//TWF1//TIAM1//PDZD2
GO:0043197	dendritic spine	Cellular component	12	135	650	16875	2.30769	0.00597272	0.08757	2.22383	CNN3//CTNND2//DLG2//NR3C1//GRM3//MAP1B//HOMER1//MAGI2//PJA2//LIN7C//NETO1//SHANK3
GO:0044309	neuron spine	Cellular component	12	135	650	16875	2.30769	0.00597272	0.08757	2.22383	CNN3//CTNND2//DLG2//NR3C1//GRM3//MAP1B//HOMER1//MAGI2//PJA2//LIN7C//NETO1//SHANK3
GO:0034708	methyltransferase complex	Cellular component	7	57	650	16875	3.18826	0.00605207	0.08757	2.2181	MLL//WDR5//SETD1B//WDR82//SIRT1//AEBP2//RNF2
GO:0035097	histone methyltransferase complex	Cellular component	7	57	650	16875	3.18826	0.00605207	0.08757	2.2181	SIRT1//AEBP2//WDR5//SETD1B//WDR82//MLL//RNF2
GO:0005667	transcription factor complex	Cellular component	20	280	650	16875	1.8544	0.00609387	0.08757	2.21511	TAF4B//TAF12//FOXN3//E2F4//FOXF2//FOXO1//FOXO3//NR6A1//FOXA1//HOXA11//FOXK2//PBX1//PITX1//POU2F1//TCF7//NCOR1//FOXJ3//NAA15//FOXP4//FOXK1
GO:0044456	synapse part	Cellular component	23	338	650	16875	1.76661	0.00613147	0.08757	2.21244	AMPH//NPY1R//CNN3//CTNND2//DLG2//NR3C1//GRM3//MAP1B//HOMER1//MAGI2//PJA2//LIN7C//NETO1//SHANK3//SV2B//ZNRF1//SYT2//DPYSL2//GABRA1//GRIA2//FZD3//BSN//CDH2
GO:0030425	dendrite	Cellular component	21	301	650	16875	1.81127	0.00653533	0.0910044	2.18473	CNN3//CTNND2//DLG2//NR3C1//GRM3//MAP1B//HOMER1//MAGI2//PJA2//LIN7C//NETO1//SHANK3//BMPR2//DPYSL2//EPHB2//NF1//PCSK1//WFS1//FZD3//IGSF9//AQP11
GO:0044446	intracellular organelle part	Cellular component	258	5923	650	16875	1.13086	0.00728815	0.0990122	2.13738	TBL1X//NRIP1//NCOR1//WDR5//KAT7//TAF12//RND3//CUX1//GALNT3//LMAN1//ST8SIA4//TNKS//AP3D1//GOSR2//PJA2//SEC24D//COG5//SEC24A//B3GNT1//GALNT6//COG2//ZDHHC17//B3GAT1//TRAPPC3//CHST15//RAB14//C1GALT1//MARCH4//B3GNT5//SLC30A7//TOP1//BAZ1A//PBRM1//MRE11A//PAFAH1B1//DNMT3A//CBX1//PPP1R12A//SEPT7//MAF//NEDD4//WDR82//ESCO1//H1F0//ARID1A//SIRT1//MECP2//ORC4//LATS1//CEP44//MYO5A//UPP2//MYH9//RNF2//SH3PXD2A//…
GO:0045202	synapse	Cellular component	28	444	650	16875	1.63721	0.00747421	0.0991223	2.12643	AMPH//NPY1R//CNN3//CTNND2//DLG2//NR3C1//GRM3//MAP1B//HOMER1//MAGI2//PJA2//LIN7C//NETO1//SHANK3//SV2B//ZNRF1//SYT2//MYH9//DPYSL2//CDH2//GABRA1//GRIA2//FZD3//BSN//NLGN3//SNCA//VAMP3//IGSF9
GO:0005737	cytoplasm	Cellular component	368	8759	650	16875	1.09075	0.0078723	0.101974	2.1039	RND3//CUX1//GALNT3//LMAN1//ST8SIA4//TNKS//AP3D1//GOSR2//PJA2//SEC24D//COG5//SEC24A//B3GNT1//GALNT6//COG2//ZDHHC17//B3GAT1//TRAPPC3//CHST15//RAB14//C1GALT1//MARCH4//B3GNT5//SLC30A7//SHOC2//PAFAH1B1//EIF4E//TOP1//TNRC6A//EDC3//EIF2C4//NOTCH1//SV2B//PPP1R12A//NBR1//RAB7A//AP3M1//ZNRF1//ABAT//BCKDHB//DPYSL2//GK//GLUL//IDH1//ILF3//MCL1//PPP3CA//UCP3//ADAM12//TOMM70A//MLXIP//KIF1B//GRAMD4//SIRT5//SIRT1…
GO:0043231	intracellular membrane-bounded organelle	Cellular component	384	9191	650	16875	1.08467	0.00879649	0.111356	2.05569	TBL1X//NRIP1//NCOR1//WDR5//KAT7//TAF12//RND3//CUX1//GALNT3//LMAN1//ST8SIA4//TNKS//AP3D1//GOSR2//PJA2//SEC24D//COG5//SEC24A//B3GNT1//GALNT6//COG2//ZDHHC17//B3GAT1//TRAPPC3//CHST15//RAB14//C1GALT1//MARCH4//B3GNT5//SLC30A7//TOP1//BAZ1A//PBRM1//MRE11A//H1F0//ARID1A//SIRT1//NOTCH1//SV2B//RNF2//CBX1//EFHC1//NBR1//RAB7A//AP3M1//ZNRF1//ABAT//BCKDHB//DPYSL2//GK//GLUL//IDH1//ILF3//MCL1//PPP3CA//UCP3//ADAM1…
GO:0043227	membrane-bounded organelle	Cellular component	384	9201	650	16875	1.08349	0.00955868	0.113061	2.0196	TBL1X//NRIP1//NCOR1//WDR5//KAT7//TAF12//RND3//CUX1//GALNT3//LMAN1//ST8SIA4//TNKS//AP3D1//GOSR2//PJA2//SEC24D//COG5//SEC24A//B3GNT1//GALNT6//COG2//ZDHHC17//B3GAT1//TRAPPC3//CHST15//RAB14//C1GALT1//MARCH4//B3GNT5//SLC30A7//TOP1//BAZ1A//PBRM1//MRE11A//H1F0//ARID1A//SIRT1//NOTCH1//SV2B//RNF2//CBX1//EFHC1//NBR1//RAB7A//AP3M1//ZNRF1//ABAT//BCKDHB//DPYSL2//GK//GLUL//IDH1//ILF3//MCL1//PPP3CA//UCP3//ADAM1…
GO:0000791	euchromatin	Cellular component	3	12	650	16875	6.49038	0.00964594	0.113061	2.01566	SIRT1//CECR2//DNMT3A
GO:0035102	PRC1 complex	Cellular component	3	12	650	16875	6.49038	0.00964594	0.113061	2.01566	RNF2//PHC3//PCGF6
GO:0008287	protein serine/threonine phosphatase complex	Cellular component	6	48	650	16875	3.24519	0.00989625	0.113061	2.00453	PPP2R5E//SHOC2//PPP3CA//PPP1R12A//WDR82//PPM1E
GO:0005624	membrane fraction	Cellular component	47	860	650	16875	1.41883	0.00994613	0.113061	2.00235	TOMM40//STX2//LMAN1//PPP3CA//RPE65//SOAT1//TNKS//IRS2//VAMP3//CLCC1//SLC7A11//CLIP3//ERO1L//RDH10//ABAT//SEPT7//CTNND2//DPYSL2//NR3C1//SNCA//BSN//MAGI2//LIN7C//PAFAH1B1//ADCY3//CDH2//DLG2//DSC3//EDA//FOXO3//GALNT3//GLI2//GNAI2//IGF2R//JAG2//MAP3K1//NEDD4//ATP8B1//SCN1A//SCN2A//CUL5//PSTPIP2//ABCC5//CKAP4//MMD//RAB14//AVEN
GO:0005720	nuclear heterochromatin	Cellular component	4	23	650	16875	4.51505	0.0107742	0.120024	1.96762	RNF2//DNMT3A//CBX1//SIRT1
GO:0070013	intracellular organelle lumen	Cellular component	116	2470	650	16875	1.21925	0.0120361	0.131453	1.91952	TBL1X//NRIP1//NCOR1//WDR5//KAT7//TAF12//TOP1//BAZ1A//PBRM1//MRE11A//TNKS//H1F0//ARID1A//SIRT1//RNF2//CCNT2//E2F4//FOXO1//FOXO3//NR6A1//NR3C1//HNRNPC//MCL1//MGMT//NR3C2//NKX2-2//NOTCH1//ORC4//POU2F1//PSMB2//PSMD9//TAF4B//UBE2D1//NCOA3//CDC7//RNMT//NCOR2//MED13//DBF4//CBX1//RCOR1//ANKRD28//UBN1//RRM2B//REV1//RRN3//GZF1//ALS2CR8//CHD9//HNRNPA3//PURB//PPARGC1A//FOXN3//FOXF2//FOXA1//HOXA11//FOXK2//PBX…
GO:0016585	chromatin remodeling complex	Cellular component	10	114	650	16875	2.27733	0.0125954	0.134916	1.89979	TBL1X//NRIP1//NCOR1//SIRT1//BAZ1A//SMARCD2//ARID1A//WDR5//SETD1B//WDR82
GO:0030662	coated vesicle membrane	Cellular component	11	132	650	16875	2.16346	0.0131042	0.137717	1.88259	LDLRAP1//SGIP1//LMAN1//SEC24D//SEC24A//SAR1B//VAMP3//AMPH//SV2B//ZNRF1//SYT2
GO:0019898	extrinsic to membrane	Cellular component	10	116	650	16875	2.23806	0.0141088	0.145529	1.85051	GNA12//GNAI2//GNG12//CDH2//ERRFI1//SNX18//SYNJ2//EZR//EPB41L4B//EPB41L5
GO:0012507	ER to Golgi transport vesicle membrane	Cellular component	4	25	650	16875	4.15385	0.0144873	0.146717	1.83901	SEC24D//SEC24A//LMAN1//SAR1B
GO:0030135	coated vesicle	Cellular component	16	227	650	16875	1.82989	0.0148974	0.148176	1.82689	LDLRAP1//SGIP1//AMPH//NPY1R//LMAN1//SEC24D//SEC24A//SAR1B//VAMP3//SNX18//FAM109A//IGF2R//RAB14//SV2B//ZNRF1//SYT2
GO:0030659	cytoplasmic vesicle membrane	Cellular component	20	306	650	16875	1.69683	0.0152391	0.148916	1.81704	SLC30A8//LDLRAP1//SGIP1//LMAN1//SEC24D//SEC24A//SAR1B//ZDHHC17//VAMP3//GRIA2//SYT2//TAP2//AMPH//SV2B//ZNRF1//ITGB3//SNCA//ULK2//KIF1B//SNX6
GO:0000932	cytoplasmic mRNA processing body	Cellular component	5	39	650	16875	3.3284	0.0162827	0.154546	1.78827	EIF4E//TOP1//TNRC6A//EDC3//EIF2C4
GO:0030133	transport vesicle	Cellular component	10	119	650	16875	2.18164	0.0166285	0.154546	1.77915	SLC30A8//LDLRAP1//LMAN1//SEC24D//SEC24A//SAR1B//IGF2R//RAB14//STX2//PCSK1
GO:0032991	macromolecular complex	Cellular component	165	3692	650	16875	1.16025	0.0166477	0.154546	1.77865	TBL1X//NRIP1//NCOR1//WDR5//KAT7//TAF12//NEDD4//RNF2//PPP2R5E//SHOC2//PAFAH1B1//GNA12//GNAI2//GNG12//PSMB2//PPP1R12A//SEPT7//H1F0//ORC4//EIF4E//TOP1//TNRC6A//EDC3//EIF2C4//SCN1A//SCN1B//SCN2A//SCN3A//SCN9A//MYO5A//UPP2//SH3PXD2A//PLXNA2//NRP1//NOTCH1//ILF3//HNRNPA3//MRPS25//ITGB3//ITGB8//MYH9//TNKS//IPO7//XPO7//TMEM48//PURB//PPARGC1A//FOXN3//E2F4//FOXF2//FOXO1//FOXO3//NR6A1//FOXA1//HOXA11//FOXK2//…
GO:0005913	cell-cell adherens junction	Cellular component	5	40	650	16875	3.24519	0.0180361	0.16469	1.74386	PLEKHA7//CDH2//DSC2//MYH9//SSX2IP
GO:0043233	organelle lumen	Cellular component	116	2515	650	16875	1.19743	0.0199481	0.179211	1.7001	TBL1X//NRIP1//NCOR1//WDR5//KAT7//TAF12//TOP1//BAZ1A//PBRM1//MRE11A//TNKS//H1F0//ARID1A//SIRT1//RNF2//CCNT2//E2F4//FOXO1//FOXO3//NR6A1//NR3C1//HNRNPC//MCL1//MGMT//NR3C2//NKX2-2//NOTCH1//ORC4//POU2F1//PSMB2//PSMD9//TAF4B//UBE2D1//NCOA3//CDC7//RNMT//NCOR2//MED13//DBF4//CBX1//RCOR1//ANKRD28//UBN1//RRM2B//REV1//RRN3//GZF1//ALS2CR8//CHD9//HNRNPA3//PURB//PPARGC1A//FOXN3//FOXF2//FOXA1//HOXA11//FOXK2//PBX…
GO:0012505	endomembrane system	Cellular component	79	1635	650	16875	1.25441	0.0202749	0.179256	1.69304	RND3//CUX1//GALNT3//LMAN1//ST8SIA4//TNKS//AP3D1//GOSR2//PJA2//SEC24D//COG5//SEC24A//B3GNT1//GALNT6//COG2//ZDHHC17//B3GAT1//TRAPPC3//CHST15//RAB14//C1GALT1//MARCH4//B3GNT5//SLC30A7//PAFAH1B1//SIRT1//IGF2R//IPO7//XPO7//TMEM48//EDA//GJB1//GRIA2//NR3C2//SDCBP//SOAT1//TAP2//SEC62//WFS1//LPGAT1//MARCH6//MRVI1//ERLIN1//CKAP4//SEZ6L//ERO1L//SAR1B//UBE2J1//TMX3//DOLPP1//STIM2//ALG9//EDEM3//RDH10//C8ORF83/…
GO:0000139	Golgi membrane	Cellular component	29	505	650	16875	1.49086	0.021344	0.183555	1.67072	LDLRAP1//CUX1//ST8SIA4//B3GNT1//ZDHHC17//GALNT3//FUT9//SAR1B//NAGPA//CLIP3//RND3//LMAN1//TNKS//AP3D1//GOSR2//PJA2//SEC24D//COG5//SEC24A//GALNT6//COG2//B3GAT1//TRAPPC3//CHST15//RAB14//C1GALT1//MARCH4//B3GNT5//SLC30A7
GO:0030134	ER to Golgi transport vesicle	Cellular component	4	28	650	16875	3.70879	0.0214202	0.183555	1.66918	LMAN1//SEC24D//SEC24A//SAR1B
GO:0012506	vesicle membrane	Cellular component	20	318	650	16875	1.6328	0.0220817	0.186356	1.65597	SLC30A8//LDLRAP1//SGIP1//LMAN1//SEC24D//SEC24A//SAR1B//ULK2//KIF1B//SNX6//ZDHHC17//VAMP3//GRIA2//SYT2//TAP2//AMPH//SV2B//ZNRF1//ITGB3//SNCA
GO:0015629	actin cytoskeleton	Cellular component	21	341	650	16875	1.5988	0.0237417	0.197375	1.62449	SEPT7//MYH9//SH3PXD2A//ACTR1A//EZR//GNG12//MYO5A//MYL12A//LANCL2//CD2AP//ABL2//AMPH//PFN2//TWF1//SNCA//CORO2A//ACTL7B//INTS6//PARVA//CTTNBP2NL//PHC3
GO:0031974	membrane-enclosed lumen	Cellular component	117	2559	650	16875	1.18699	0.0245915	0.200077	1.60922	TBL1X//NRIP1//NCOR1//WDR5//KAT7//TAF12//TOP1//BAZ1A//PBRM1//MRE11A//TNKS//H1F0//ARID1A//SIRT1//RNF2//IGF2R//CCNT2//E2F4//FOXO1//FOXO3//NR6A1//NR3C1//HNRNPC//MCL1//MGMT//NR3C2//NKX2-2//NOTCH1//ORC4//POU2F1//PSMB2//PSMD9//TAF4B//UBE2D1//NCOA3//CDC7//RNMT//NCOR2//MED13//DBF4//CBX1//RCOR1//ANKRD28//UBN1//RRM2B//REV1//RRN3//GZF1//ALS2CR8//CHD9//HNRNPA3//PURB//PPARGC1A//FOXN3//FOXF2//FOXA1//HOXA11//FOX…
GO:0070161	anchoring junction	Cellular component	14	202	650	16875	1.79931	0.0247851	0.200077	1.60581	CTNND2//SDCBP//EPB41L5//WNK3//ARHGAP24//PLEKHA7//CDH2//DSC2//MYH9//SSX2IP//EZR//PARVA//LMLN//DSC3
GO:0008180	signalosome	Cellular component	4	30	650	16875	3.46154	0.026998	0.212118	1.56867	MYH9//COPS2//BASP1//NOD2
GO:0005912	adherens junction	Cellular component	13	185	650	16875	1.82432	0.0270384	0.212118	1.56802	CDH2//DSC2//MYH9//SSX2IP//PLEKHA7//SDCBP//EZR//PARVA//ARHGAP24//LMLN//CTNND2//EPB41L5//WNK3
GO:0030658	transport vesicle membrane	Cellular component	6	61	650	16875	2.55359	0.0295324	0.228466	1.5297	LDLRAP1//LMAN1//SEC24D//SEC24A//SAR1B//SLC30A8
GO:0044431	Golgi apparatus part	Cellular component	35	656	650	16875	1.38514	0.0325297	0.246603	1.48772	RND3//CUX1//GALNT3//LMAN1//ST8SIA4//TNKS//AP3D1//GOSR2//PJA2//SEC24D//COG5//SEC24A//B3GNT1//GALNT6//COG2//ZDHHC17//B3GAT1//TRAPPC3//CHST15//RAB14//C1GALT1//MARCH4//B3GNT5//SLC30A7//CLIP3//GAS6//NOTCH1//TRAPPC8//PCSK1//FAM109A//LDLRAP1//IGF2R//FUT9//SAR1B//NAGPA
GO:0005730	nucleolus	Cellular component	32	590	650	16875	1.40808	0.0327623	0.246603	1.48463	SEPT7//FRG1//SLC29A2//HOXA11//ILF3//AFF3//NFATC3//PITX1//TAF4B//TOP1//EZR//ZNF192//FXR1//RNMT//N4BP1//UTP14C//ZEB2//PPM1E//ZCCHC11//SIRT1//CD2AP//RRN3//GZF1//C15ORF29//ALS2CR8//MIDN//OSR1//STK35//SENP5//HNRNPA3//FOXK1//WIPF3
GO:0005881	cytoplasmic microtubule	Cellular component	4	32	650	16875	3.24519	0.0333663	0.2478	1.47669	PAFAH1B1//MID1//SS18//SYNJ2
GO:0031252	cell leading edge	Cellular component	15	231	650	16875	1.68581	0.03421	0.250723	1.46585	MYH9//MYO5A//EZR//CD2AP//TRPM7//CDH2//DGKZ//SLC39A14//PARVA//SCYL3//RAPH1//TWF1//SYNJ2//FZD3//PAFAH1B1
GO:0009898	internal side of plasma membrane	Cellular component	8	98	650	16875	2.11931	0.0352811	0.255215	1.45246	GNA12//GNAI2//GNG12//ERRFI1//SNX18//NF1//RASAL2//LDLRAP1
GO:0055037	recycling endosome	Cellular component	6	64	650	16875	2.43389	0.0362518	0.258047	1.44067	RAP2B//CLIP3//VAMP3//ATP11A//LDLRAP1//FAM109A
GO:0000792	heterochromatin	Cellular component	5	48	650	16875	2.70433	0.0365991	0.258047	1.43653	RNF2//DNMT3A//CBX1//SIRT1//MECP2
GO:0031234	extrinsic to internal side of plasma membrane	Cellular component	5	49	650	16875	2.64914	0.0395172	0.27377	1.40321	GNA12//GNAI2//GNG12//ERRFI1//SNX18
GO:0030315	T-tubule	Cellular component	3	20	650	16875	3.89423	0.0398121	0.27377	1.39998	EDNRA//SCN1A//SCN2A
GO:0044306	neuron projection terminus	Cellular component	6	66	650	16875	2.36014	0.0412344	0.277081	1.38474	DPYSL2//AMPH//SEPT7//PCSK1//SYNJ2//BSN
GO:0044433	cytoplasmic vesicle part	Cellular component	21	362	650	16875	1.50606	0.0412885	0.277081	1.38417	SLC30A8//LDLRAP1//SGIP1//LMAN1//SEC24D//SEC24A//SAR1B//ULK2//KIF1B//SNX6//ZDHHC17//VAMP3//GRIA2//SYT2//TAP2//AMPH//SV2B//ZNRF1//ITGB3//SNCA//GAS6
GO:0000267	cell fraction	Cellular component	57	1177	650	16875	1.25727	0.0431661	0.286233	1.36486	TOMM40//ADCY3//CDH2//DLG2//DSC3//EDA//FOXO3//GALNT3//GLI2//GNAI2//IGF2R//JAG2//MAP3K1//NEDD4//ATP8B1//SCN1A//SCN2A//CUL5//PSTPIP2//ABCC5//CKAP4//MMD//ERO1L//RAB14//AVEN//RDH10//DPYSL2//STX2//FLT3LG//MAP1B//PAFAH1B1//PDE3A//PDE4D//PPP3CA//ARID1A//ARHGEF10//IPO7//UBR5//SYNJ2//LMAN1//RPE65//SOAT1//TNKS//IRS2//VAMP3//CLCC1//SLC7A11//CLIP3//ABAT//SEPT7//CTNND2//NR3C1//SNCA//BSN//MAGI2//LIN7C//PDE7A
GO:0014704	intercalated disc	Cellular component	3	21	650	16875	3.70879	0.0451578	0.295916	1.34527	CDH2//SCN1A//SCN2A
GO:0016023	cytoplasmic membrane-bounded vesicle	Cellular component	40	789	650	16875	1.31617	0.0463854	0.300426	1.33362	NOTCH1//SV2B//STX2//PCSK1//MYO5A//SLC30A8//IGF2R//NLGN3//LDLRAP1//SGIP1//AMPH//NPY1R//LMAN1//SEC24D//SEC24A//SAR1B//VAMP3//SNX18//FAM109A//RAB14//ULK2//KIF1B//SNX6//ZDHHC17//GRIA2//SYT2//TAP2//ZNRF1//ITGB3//SNCA//GAS6//AHCY//CALU//SDCBP//RAB7A//PDIA4//SLC30A4//HERC3//RFFL//SLC30A7
GO:0030136	clathrin-coated vesicle	Cellular component	12	181	650	16875	1.72121	0.0476689	0.305191	1.32176	LDLRAP1//SGIP1//AMPH//NPY1R//IGF2R//RAB14//VAMP3//SV2B//ZNRF1//SYT2//SNX18//FAM109A
GO:0031410	cytoplasmic vesicle	Cellular component	42	839	650	16875	1.29962	0.0495691	0.31375	1.30479	NOTCH1//SV2B//STX2//PCSK1//MYO5A//SLC30A8//IGF2R//NLGN3//LDLRAP1//SGIP1//AMPH//NPY1R//LMAN1//SEC24D//SEC24A//SAR1B//SLC30A4//HERC3//RFFL//SLC30A7//VAMP3//SNX18//FAM109A//RAB14//ULK2//KIF1B//SNX6//ZDHHC17//GRIA2//SYT2//TAP2//ZNRF1//ITGB3//SNCA//GAS6//AHCY//CALU//SDCBP//RAB7A//PDIA4//NBR1//NRP1

## Sheet: GO_MF
#Column "GO.ID" stands for the ID of gene ontology term
#Column "Term" stands for the name of gene ontology term
#Column "Ontology" stands for the ontology of GOID belongs to
#Column "Count" stands for the number of DE genes associated with the listed GOID
#Column "Pop.Hits" stands for the number of background population genes associated with the listed GOID
#Column "List.Total" stands for the total number of DE genes
#Column "Pop.Total" stands for the total number of background population genes
#Column "Fold.Enrichment" stands for the Fold Enrichment value of the GOID, it equals (Count/Pop.Hits)/(List.Total/Pop.Total)
#Column "Pvalue" stands for the significance testing value of the GOID
#Column "FDR" stands for the false discovery rate of the GOID, using Benjamini & Hochberg (1995) method
#Column "Enrichment.Score" stands for the Enrichment Score value of the GOID, it equals (-log10(Pvalue))
#Column "GENES" stands for the DE genes associated with the GOID
GO.ID	Term	Ontology	Count	Pop.Hits	List.Total	Pop.Total	Fold.Enrichment	Pvalue	FDR	Enrichment.Score	GENES
GO:0005515	protein binding	Molecular function	324	6731	613	15325	1.20339	3.59342e-06	0.00115773	5.44449	LMAN1//ST13//DNAJC16//STX2//VAMP3//LDLRAP1//GNAI2//CBL//IGF2R//SDCBP//RAB14//RIC8B//NUAK1//SIRT1//PRKCB//SNCA//TBL1X//IPO7//PCSK1//CNN3//GMFB//MAP1B//MYH9//MYO5A//PFN2//PLS3//LIMCH1//COTL1//TRPM7//PARVA//CLMN//SSH2//FMNL2//WIPF3//CUX1//ABL2//EZR//CORO2A//TWF1//EDA//FLT3LG//GAS6//GDNF//NRG1//WNT7B//NRIP1//NRG2//PLXNC1//ITGB3//NLGN3//PIK3R1//BMPR2//NRP1//CHN1//CRKL//VAV3//NBR1//MAP3K1//AKAP5//YWHAG…
GO:0003700	sequence-specific DNA binding transcription factor activity	Molecular function	67	948	613	15325	1.76688	3.59595e-06	0.00115773	5.44419	FOXA1//BCL11B//RCOR1//FOXN3//FOXF2//FOXO1//FOXO3//FOXK2//FOXJ3//FOXP4//FOXK1//NR6A1//NR2F2//ZFP36L1//CBL//CEBPD//CUX1//E2F4//EGR3//EN2//GABPB1//GLI2//NR3C1//HOXA11//MAF//MLL//NR3C2//MNT//MYBL2//MYCL1//NFATC3//NFATC4//NFX1//NOTCH1//NPAT//PBX1//PEG3//PITX1//PLAG1//PLAGL2//POU2F1//PURB//ARID4A//TAF4B//TAF12//TCF7//TEAD1//ZNF148//ZNF192//ONECUT2//NCOR1//ZEB2//SLC30A9//NFAT5//KAT7//ZHX1//KLF12//ZNF281…
GO:0001071	nucleic acid binding transcription factor activity	Molecular function	67	949	613	15325	1.76502	3.72658e-06	0.00115773	5.42869	FOXA1//BCL11B//RCOR1//ZFP36L1//CBL//CEBPD//CUX1//E2F4//EGR3//EN2//FOXF2//FOXO3//GABPB1//NR6A1//GLI2//NR3C1//HOXA11//FOXK2//MAF//MLL//NR3C2//MNT//MYBL2//MYCL1//NFATC3//NFATC4//NFX1//NOTCH1//NPAT//PBX1//PEG3//PITX1//PLAG1//PLAGL2//POU2F1//PURB//ARID4A//TAF4B//TAF12//TCF7//TEAD1//NR2F2//ZNF148//ZNF192//ONECUT2//NCOR1//ZEB2//SLC30A9//NFAT5//KAT7//ZHX1//KLF12//ZNF281//UBN1//KLF3//BACH2//ALS2CR8//CSRNP…
GO:0005248	voltage-gated sodium channel activity	Molecular function	5	15	613	15325	8.33333	0.000216574	0.0504616	3.66439	SCN1A//SCN1B//SCN2A//SCN3A//SCN9A
GO:0003714	transcription corepressor activity	Molecular function	17	169	613	15325	2.51479	0.000442766	0.0541232	3.35383	ZMYND8//MECP2//MNT//NPAT//TBL1X//NR2F2//NRIP1//NCOR1//NCOR2//BASP1//ZHX1//KLF12//SIRT1//BCL11A//BCOR//AEBP2//SCAI
GO:0003712	transcription cofactor activity	Molecular function	33	442	613	15325	1.86652	0.000443129	0.0541232	3.35347	MED13//PPARGC1A//ZMYND8//DCC//MNT//NFATC4//NKX2-2//NPAT//PSMD9//SMARCD2//TAF12//NCOA3//NRIP1//ARID1A//SERTAD2//MKL2//MECP2//TBL1X//NR2F2//NCOR1//NCOR2//BASP1//ZHX1//KLF12//SIRT1//BCL11A//BCOR//AEBP2//SCAI//PRKCB//SS18//DCAF6//NRG1
GO:0003690	double-stranded DNA binding	Molecular function	16	155	613	15325	2.58065	0.000485158	0.0541232	3.31412	MECP2//FOXN3//FOXF2//FOXO1//FOXO3//NR3C1//FOXA1//FOXK2//AFF3//MRE11A//PURB//ZNF148//FOXJ3//FOXP4//JDP2//FOXK1
GO:0008301	DNA binding, bending	Molecular function	9	59	613	15325	3.81356	0.000519096	0.0541232	3.28475	FOXN3//FOXF2//FOXO1//FOXO3//FOXA1//FOXK2//FOXJ3//FOXP4//FOXK1
GO:0000988	protein binding transcription factor activity	Molecular function	34	469	613	15325	1.81237	0.000617811	0.0541232	3.20914	MED13//PPARGC1A//ZMYND8//NRG1//DCC//MNT//NFATC4//NKX2-2//NPAT//PSMD9//SMARCD2//TAF12//NCOA3//NRIP1//ARID1A//SERTAD2//MKL2//MECP2//TBL1X//NR2F2//NCOR1//NCOR2//BASP1//ZHX1//KLF12//SIRT1//BCL11A//BCOR//AEBP2//SCAI//PRKCB//SS18//DCAF6//PITX1
GO:0005488	binding	Molecular function	506	11840	613	15325	1.06841	0.000641079	0.0541232	3.19309	LMAN1//ST13//DNAJC16//SOAT1//STX2//VAMP3//ABL2//ADCY3//ADRBK2//RND3//BMPR2//SEPT7//CTPS//DGKG//DHX15//ELAVL2//EPHA3//EPHB2//GK//GLUL//GNA12//GNAI2//GNL1//HNRNPC//MARK1//MARK3//MAP3K1//MYH9//MYO5A//ORC4//ATP8B1//PRKCB//RAP2B//MAP2K4//TRA2B//SPAST//STK4//TAP2//TOP1//UBE2D1//RAB7A//CDC7//DGKZ//PDE5A//SYNJ2//LATS1//ULK2//RHOBTB1//NUAK1//ABCC5//ACTR1A//RBM12//SLC30A9//ATG7//MAP3K2//PPARGC1A//PIM2//CEL…
GO:0042800	histone methyltransferase activity (H3-K4 specific)	Molecular function	4	11	613	15325	9.09091	0.000668068	0.0541232	3.17518	MLL//WDR5//SETD1B//WDR82
GO:0000989	transcription factor binding transcription factor activity	Molecular function	33	455	613	15325	1.81319	0.000733596	0.0541232	3.13454	MED13//PPARGC1A//ZMYND8//NRG1//DCC//MNT//NFATC4//NKX2-2//NPAT//PSMD9//SMARCD2//TAF12//NCOA3//NRIP1//ARID1A//SERTAD2//MKL2//MECP2//TBL1X//NR2F2//NCOR1//NCOR2//BASP1//ZHX1//KLF12//SIRT1//BCL11A//BCOR//AEBP2//SCAI//PRKCB//SS18//DCAF6
GO:0046872	metal ion binding	Molecular function	191	3908	613	15325	1.22185	0.000754937	0.0541232	3.12209	ABL2//IDH1//FOXK2//MARK1//ATP8B1//SNCA//STK4//LATS1//ICK//MAST3//ATP11A//REV1//FOXK1//CALB2//CALU//CBL//CDH2//CDH11//CDH13//DGKG//DSC2//DSC3//CELSR3//GALNT3//GAS6//JAG2//MGMT//MYO5A//NID1//NOTCH1//PLCB3//PLS3//PPP3CA//SLIT1//LRP8//MYL12A//FSTL4//KIAA1045//PCDH10//STIM2//NECAB1//PCDH20//EDEM3//CALML4//EFHC1//NPNT//EFHA2//KDM3A//ZFP36L1//EGR3//FHL1//NR6A1//GLI2//NR3C1//NBR1//ADAM11//MAP3K1//MID1//M…
GO:0030971	receptor tyrosine kinase binding	Molecular function	6	30	613	15325	5	0.00104376	0.0694843	2.9814	FLT3LG//GAS6//NR3C1//NRG1//PIK3R2//YWHAG
GO:0043167	ion binding	Molecular function	192	3962	613	15325	1.21151	0.00112581	0.0699501	2.94854	ABL2//IDH1//FOXK2//MARK1//ATP8B1//SNCA//STK4//LATS1//ICK//MAST3//ATP11A//REV1//FOXK1//CALB2//CALU//CBL//CDH2//CDH11//CDH13//DGKG//DSC2//DSC3//CELSR3//GALNT3//GAS6//JAG2//MGMT//MYO5A//NID1//NOTCH1//PLCB3//PLS3//PPP3CA//SLIT1//LRP8//MYL12A//FSTL4//KIAA1045//PCDH10//STIM2//NECAB1//PCDH20//EDEM3//CALML4//EFHC1//NPNT//EFHA2//ADCY3//BMPR2//ZFP36L1//DAGLA//CHN1//DNMT3A//EGR3//FHL1//NR6A1//GLI2//GNA12//G…
GO:0043565	sequence-specific DNA binding	Molecular function	43	662	613	15325	1.62387	0.00121186	0.0705906	2.91655	DLX5//BCL11B//MLL//ORC4//PURB//DNMT3A//CEBPD//FOXN3//CUX1//EN2//FOXF2//FOXO1//FOXO3//NR6A1//GLI2//NR3C1//FOXA1//HOXA11//FOXK2//MAF//NR3C2//NKX2-2//NOTCH1//PBX1//PITX1//POU2F1//TCF7//NR2F2//ZNF711//ZNF148//ONECUT2//NCOR1//ZEB2//ZHX1//FOXJ3//KDM6B//ZNF281//CREBZF//BACH2//GZF1//FOXP4//JDP2//FOXK1
GO:0043169	cation binding	Molecular function	191	3952	613	15325	1.20825	0.00133802	0.0733548	2.87354	ABL2//IDH1//FOXK2//MARK1//ATP8B1//SNCA//STK4//LATS1//ICK//MAST3//ATP11A//REV1//FOXK1//CALB2//CALU//CBL//CDH2//CDH11//CDH13//DGKG//DSC2//DSC3//CELSR3//GALNT3//GAS6//JAG2//MGMT//MYO5A//NID1//NOTCH1//PLCB3//PLS3//PPP3CA//SLIT1//LRP8//MYL12A//FSTL4//KIAA1045//PCDH10//STIM2//NECAB1//PCDH20//EDEM3//CALML4//EFHC1//NPNT//EFHA2//ADCY3//BMPR2//ZFP36L1//DAGLA//CHN1//DNMT3A//EGR3//FHL1//NR6A1//GLI2//GNA12//G…
GO:0003677	DNA binding	Molecular function	119	2311	613	15325	1.28732	0.00178021	0.0921755	2.74953	DLX5//BCL11B//NOTCH1//NKX2-2//MLL//REV1//ORC4//FOXN3//FOXF2//FOXO1//FOXO3//NR3C1//FOXA1//FOXK2//AFF3//MRE11A//PURB//ZNF148//FOXJ3//FOXP4//JDP2//FOXK1//TOP1//MECP2//GABPB1//GLI2//TBL1X//TCF7//NCOR1//BASP1//RCOR1//ZNF281//BCOR//OVOL2//CEBPD//CUX1//EN2//NR6A1//HOXA11//MAF//NR3C2//PBX1//PITX1//POU2F1//NR2F2//ZNF711//ONECUT2//ZEB2//ZHX1//KDM6B//CREBZF//BACH2//GZF1//DNMT3A//ZFP36L1//E2F4//EGR3//H1F0//I…
GO:0008134	transcription factor binding	Molecular function	28	391	613	15325	1.79028	0.00216777	0.10598	2.66399	NCOA3//NCOR1//MED13//WFS1//PSMD9//SIRT1//NRIP1//TAF4B//ZMYND8//FOXN3//E2F4//FOXF2//FOXO1//FOXO3//FOXA1//FOXK2//NKX2-2//PBX1//PURB//STK4//TAF12//TBL1X//PPARGC1A//FOXJ3//BCOR//LCOR//FOXP4//FOXK1
GO:0046875	ephrin receptor binding	Molecular function	5	24	613	15325	5.20833	0.00227426	0.10598	2.64316	CBL//CHN1//EFNA3//SDCBP//TIAM1
GO:0043566	structure-specific DNA binding	Molecular function	18	216	613	15325	2.08333	0.00268121	0.118995	2.57167	FOXN3//FOXF2//FOXO1//FOXO3//NR3C1//FOXA1//FOXK2//AFF3//MRE11A//PURB//ZNF148//FOXJ3//FOXP4//JDP2//FOXK1//MECP2//NOTCH1//TOP1
GO:0005546	phosphatidylinositol-4,5-bisphosphate binding	Molecular function	5	26	613	15325	4.80769	0.00329507	0.139591	2.48214	MARK1//PFN2//TWF1//LDLRAP1//FAM123B
GO:0035091	phosphatidylinositol binding	Molecular function	13	142	613	15325	2.28873	0.00457809	0.185512	2.33932	PIK3R1//MARK1//PFN2//TWF1//LDLRAP1//FAM123B//LANCL2//BBS5//SH3PXD2A//PHF12//SNX6//SNX27//SNX18
GO:0030374	ligand-dependent nuclear receptor transcription coactivator activity	Molecular function	6	40	613	15325	3.75	0.0048119	0.186862	2.31768	PRKCB//SS18//NCOA3//MED13//PPARGC1A//DCAF6
GO:0016879	ligase activity, forming carbon-nitrogen bonds	Molecular function	23	321	613	15325	1.79128	0.00514378	0.19176	2.28872	CTPS//GLUL//LGSN//TTLL3//CBL//MAP3K1//NEDD4//RNF2//UBE2D1//CUL3//HERC3//PJA2//MARCH6//FBXW2//UBR5//UBE2J1//BCOR//CHFR//PELI1//MARCH4//KCTD10//ZNRF1//UBE2V2
GO:0008270	zinc ion binding	Molecular function	102	2002	613	15325	1.27373	0.00541746	0.19232	2.2662	ZFP36L1//CBL//EGR3//FHL1//NR6A1//GLI2//NR3C1//NBR1//ADAM11//MAP3K1//MID1//MLL//NR3C2//NFX1//PEG3//PLAG1//PLAGL2//PRKCB//RNF2//SNCA//NR2F2//ZNF711//ZNF148//ZNF192//ZNF200//ADAM12//PDE5A//TNKS//ZNF516//ZEB2//PJA2//SEC24D//MARCH6//PCGF3//ZMYND11//SEC24A//DBF4//ADAMTS5//KAT7//BAZ1A//ZHX1//KLF12//KLF8//ZNF652//RNF44//ZNF507//LIMCH1//PEG10//ATMIN//ZCCHC11//ZDHHC17//SIRT5//SIRT1//ZNF281//ZMYND8//CHD5//Z…
GO:0003756	protein disulfide isomerase activity	Molecular function	3	10	613	15325	7.5	0.00619056	0.19232	2.20827	ITGB3//PDIA4//TMX3
GO:0004115	3',5'-cyclic-AMP phosphodiesterase activity	Molecular function	3	10	613	15325	7.5	0.00619056	0.19232	2.20827	PDE3A//PDE4D//PDE7A
GO:0016864	intramolecular oxidoreductase activity, transposing S-S bonds	Molecular function	3	10	613	15325	7.5	0.00619056	0.19232	2.20827	ITGB3//PDIA4//TMX3
GO:0031690	adrenergic receptor binding	Molecular function	3	10	613	15325	7.5	0.00619056	0.19232	2.20827	ADRA2A//MAGI2//NEDD4
GO:0003676	nucleic acid binding	Molecular function	157	3291	613	15325	1.19265	0.00706778	0.212489	2.15072	EIF4E//PURB//DLX5//BCL11B//NOTCH1//NKX2-2//FXR1//ZFP36L1//DNMT3A//E2F4//EGR3//FOXF2//FOXO3//NR6A1//H1F0//FOXA1//ILF3//AFF3//MECP2//MGMT//MLL//MNT//MRE11A//MYBL2//MYCL1//NFATC3//NFATC4//NFX1//ORC4//PBX1//PLAG1//PLAGL2//ARID4A//SOS1//TAF4B//TAF12//TEAD1//NR2F2//TOP1//ZNF192//ARID1A//NCOR2//ZNF516//TOX//NFAT5//ZMYND11//PPARGC1A//KLF12//KLF8//ZNF652//ZNF507//MLXIP//PEG10//RCOR1//CHD5//ZBTB44//UBN1//Z…
GO:0051219	phosphoprotein binding	Molecular function	6	44	613	15325	3.40909	0.00773664	0.22533	2.11145	CBL//LDLRAP1//NEDD4//IGF2R//PAFAH1B1//SNCA
GO:0046934	phosphatidylinositol-4,5-bisphosphate 3-kinase activity	Molecular function	3	11	613	15325	6.81818	0.00826149	0.226462	2.08294	PIK3R1//PIK3R2//IRS2
GO:0052813	phosphatidylinositol bisphosphate kinase activity	Molecular function	3	11	613	15325	6.81818	0.00826149	0.226462	2.08294	PIK3R1//PIK3R2//IRS2
GO:0004842	ubiquitin-protein ligase activity	Molecular function	18	246	613	15325	1.82927	0.0101601	0.270092	1.9931	UBR5//CBL//MAP3K1//NEDD4//RNF2//UBE2D1//CUL3//HERC3//PJA2//MARCH6//FBXW2//UBE2J1//BCOR//CHFR//PELI1//MARCH4//KCTD10//ZNRF1
GO:0016862	intramolecular oxidoreductase activity, interconverting keto- and enol-groups	Molecular function	3	12	613	15325	6.25	0.0106918	0.270092	1.97095	ITGB3//PDIA4//TMX3
GO:0005272	sodium channel activity	Molecular function	5	34	613	15325	3.67647	0.0107225	0.270092	1.9697	SCN1A//SCN1B//SCN2A//SCN3A//SCN9A
GO:0016881	acid-amino acid ligase activity	Molecular function	20	289	613	15325	1.7301	0.0124528	0.305421	1.90473	TTLL3//CBL//MAP3K1//NEDD4//RNF2//UBE2D1//CUL3//HERC3//PJA2//MARCH6//FBXW2//UBR5//UBE2J1//BCOR//CHFR//PELI1//MARCH4//KCTD10//ZNRF1//UBE2V2
GO:0005385	zinc ion transmembrane transporter activity	Molecular function	3	13	613	15325	5.76923	0.013492	0.314657	1.86992	SLC30A4//SLC39A14//SLC30A8
GO:0004114	3',5'-cyclic-nucleotide phosphodiesterase activity	Molecular function	4	24	613	15325	4.16667	0.0142414	0.314657	1.84645	PDE3A//PDE4D//PDE7A//PDE5A
GO:0003682	chromatin binding	Molecular function	17	237	613	15325	1.79325	0.0146959	0.314657	1.8328	NOTCH1//TOP1//CUX1//DNMT3A//GLI2//NR3C1//MNT//NFATC3//NKX2-2//PRKCB//RNF2//TCF7//NCOA3//CBX1//PBRM1//CHD7//FOXP4
GO:0016874	ligase activity	Molecular function	29	473	613	15325	1.53277	0.0151388	0.314657	1.81991	CTPS//GLUL//LGSN//TTLL3//CBL//MAP3K1//NEDD4//RNF2//UBE2D1//CUL3//HERC3//PJA2//MARCH6//FBXW2//UBR5//UBE2J1//BCOR//CHFR//PELI1//MARCH4//KCTD10//ZNRF1//UBE2V2//MID1//NFX1//NEURL1B//PELI2//UNKL//RFFL
GO:0005215	transporter activity	Molecular function	63	1200	613	15325	1.3125	0.0155239	0.314657	1.809	SLC25A26//SLC38A1//SLC29A2//SLC6A6//SLC39A14//TAP2//ABCC5//ATP8B1//ATP11A//GRIA2//XPO7//GABRA1//TRPM7//TTYH3//ANO4//GJB1//KCNA6//SCN1A//SCN1B//SCN2A//SCN3A//SCN9A//CACNA2D2//KCNK10//KCTD10//KCTD7//CLCC1//CUL5//SLC7A11//SLC38A2//SV2B//SLC22A23//SLC25A22//SLC30A4//SLC30A8//SLC4A4//SLC4A7//TOMM40//TOMM70A//SLC30A9//SLC30A7//SLC41A1//SEC62//AP3D1//IPO7//COG2//WNK3//ZDHHC17//FLVCR1//MCL1//KIAA1919//SL…
GO:0016773	phosphotransferase activity, alcohol group as acceptor	Molecular function	42	746	613	15325	1.40751	0.0160039	0.314657	1.79577	DGKG//DGKZ//GK//PI4K2B//PIP5KL1//ABL2//ADRBK2//MAP3K1//MAP2K4//MAP3K2//SCYL3//WNK3//MARK1//MARK3//STK4//CDC7//LATS1//ULK2//NUAK1//PIM2//ICK//MAST3//HUNK//TAOK3//CSNK1G1//TRPM7//STK35//HIPK1//BMPR2//PRKCB//EPHB2//FGF5//FGF9//EPHA3//EFNA3//NRG2//IGF2R//NRP1//PIK3R2//PIK3R1//IRS2//N4BP2
GO:0004112	cyclic-nucleotide phosphodiesterase activity	Molecular function	4	25	613	15325	4	0.0164301	0.314657	1.78436	PDE4D//PDE5A//PDE3A//PDE7A
GO:0030544	Hsp70 protein binding	Molecular function	3	14	613	15325	5.35714	0.0166695	0.314657	1.77808	NR3C1//SNCA//ST13
GO:0051019	mitogen-activated protein kinase binding	Molecular function	3	14	613	15325	5.35714	0.0166695	0.314657	1.77808	NBR1//MAP3K1//SIRT1
GO:0016301	kinase activity	Molecular function	45	813	613	15325	1.38376	0.0169746	0.314657	1.7702	DGKZ//AK3//DGKG//GK//DLG2//PI4K2B//PIP5KL1//ABL2//ADRBK2//MAP3K1//MAP2K4//MAP3K2//SCYL3//WNK3//MARK1//MARK3//STK4//CDC7//LATS1//ULK2//NUAK1//PIM2//ICK//MAST3//HUNK//TAOK3//CSNK1G1//TRPM7//STK35//HIPK1//BMPR2//PRKCB//EPHB2//FGF5//FGF9//EPHA3//EFNA3//NRG2//IGF2R//NRP1//PIK3R2//PIK3R1//IRS2//N4BP2//ZMYND8
GO:0050681	androgen receptor binding	Molecular function	5	38	613	15325	3.28947	0.0169804	0.314657	1.77005	PRKCB//NCOA3//NRIP1//PPARGC1A//KDM3A
GO:0019787	small conjugating protein ligase activity	Molecular function	18	260	613	15325	1.73077	0.0171	0.314657	1.76701	CBL//MAP3K1//NEDD4//RNF2//UBE2D1//CUL3//HERC3//PJA2//MARCH6//FBXW2//UBR5//UBE2J1//BCOR//CHFR//PELI1//MARCH4//KCTD10//ZNRF1
GO:0019904	protein domain specific binding	Molecular function	31	519	613	15325	1.49326	0.0172184	0.314657	1.76401	CBL//CCDC6//ADAM12//SYNJ2//QKI//CD2AP//ASAP1//SGIP1//AFAP1L2//SHANK3//DLG2//FZD3//MAGI2//LIN7C//SIRT1//NOD2//MCL1//NIPBL//RNF2//DLX5//E2F4//FOXA1//MECP2//NEDD4//RAP2B//ST13//TBL1X//YWHAG//BASP1//FOXJ3//SSX2IP
GO:0003713	transcription coactivator activity	Molecular function	18	261	613	15325	1.72414	0.0177097	0.317412	1.75179	PRKCB//SS18//NCOA3//MED13//PPARGC1A//DCAF6//DCC//MNT//NFATC4//NKX2-2//NPAT//PSMD9//SMARCD2//TAF12//NRIP1//ARID1A//SERTAD2//MKL2
GO:0017124	SH3 domain binding	Molecular function	10	118	613	15325	2.11864	0.019898	0.349905	1.70119	CBL//CCDC6//ADAM12//SYNJ2//QKI//CD2AP//ASAP1//SGIP1//AFAP1L2//SHANK3
GO:0022857	transmembrane transporter activity	Molecular function	50	936	613	15325	1.33547	0.0222285	0.383648	1.65309	SLC25A26//SLC38A1//SLC29A2//SLC6A6//SLC39A14//TAP2//ABCC5//GRIA2//GABRA1//TRPM7//TTYH3//ANO4//GJB1//KCNA6//SCN1A//SCN1B//SCN2A//SCN3A//SCN9A//CACNA2D2//KCNK10//KCTD10//KCTD7//CLCC1//CUL5//SLC7A11//SLC38A2//SLC25A22//SLC30A4//SLC30A8//SLC4A4//SLC4A7//TOMM40//TOMM70A//SLC30A9//SLC30A7//SLC41A1//ATP8B1//ATP11A//WNK3//ZDHHC17//MCL1//KIAA1919//SLC36A1//SLC9A4//UCP3//SLC2A12//HNRNPA3//SV2B//SLC22A23
GO:0008022	protein C-terminus binding	Molecular function	12	156	613	15325	1.92308	0.0228481	0.387172	1.64115	AMPH//FOXN3//MRE11A//NPAT//SDCBP//TBL1X//DGKZ//PRRC2C//SIRT1//NIPBL//SHANK3//EFHC1
GO:0003705	sequence-specific distal enhancer binding RNA polymerase II transcription factor activity	Molecular function	9	104	613	15325	2.16346	0.0234264	0.389882	1.6303	FOXN3//FOXF2//FOXO1//FOXO3//FOXA1//FOXK2//FOXJ3//FOXP4//FOXK1
GO:0000287	magnesium ion binding	Molecular function	13	176	613	15325	1.84659	0.0246559	0.403146	1.60808	ABL2//IDH1//FOXK2//MARK1//ATP8B1//SNCA//STK4//LATS1//ICK//MAST3//ATP11A//REV1//FOXK1
GO:0016740	transferase activity	Molecular function	87	1777	613	15325	1.22397	0.0258765	0.415809	1.58709	TFB1M//DGKZ//ST8SIA4//ABHD5//AGPAT5//ABAT//DNMT3A//REV1//KIAA2022//MGMT//TNKS//AK3//DGKG//GK//NMT2//DLG2//TAF12//NCOA3//KAT7//PI4K2B//PIP5KL1//RNMT//GALNT3//GALNT6//ABL2//ADRBK2//MAP3K1//MAP2K4//MAP3K2//SCYL3//WNK3//MARK1//MARK3//STK4//CDC7//LATS1//ULK2//NUAK1//PIM2//ICK//MAST3//HUNK//TAOK3//CSNK1G1//TRPM7//STK35//HIPK1//BMPR2//PRKCB//EPHB2//FGF5//FGF9//SOAT1//UPP2//EPHA3//EFNA3//NRG2//IGF2R//NRP…
GO:0005003	ephrin receptor activity	Molecular function	3	17	613	15325	4.41176	0.0284994	0.44269	1.54516	EPHA3//EFNA3//EPHB2
GO:0015932	nucleobase-containing compound transmembrane transporter activity	Molecular function	3	17	613	15325	4.41176	0.0284994	0.44269	1.54516	SLC25A26//SLC29A2//HNRNPA3
GO:0008565	protein transporter activity	Molecular function	8	91	613	15325	2.1978	0.0291241	0.444978	1.53575	XPO7//TOMM70A//TOMM40//MCL1//SEC62//AP3D1//IPO7//COG2
GO:0008320	protein transmembrane transporter activity	Molecular function	3	18	613	15325	4.16667	0.033208	0.476152	1.47876	MCL1//TOMM70A//TOMM40
GO:0019894	kinesin binding	Molecular function	3	18	613	15325	4.16667	0.033208	0.476152	1.47876	SNCA//ARHGEF10//KIF1B
GO:0022884	macromolecule transmembrane transporter activity	Molecular function	3	18	613	15325	4.16667	0.033208	0.476152	1.47876	TOMM70A//TOMM40//MCL1
GO:0035004	phosphatidylinositol 3-kinase activity	Molecular function	3	18	613	15325	4.16667	0.033208	0.476152	1.47876	PIK3R2//PIK3R1//IRS2
GO:0005543	phospholipid binding	Molecular function	15	223	613	15325	1.68161	0.0346773	0.489686	1.45995	MARK1//PIK3R1//PFN2//TWF1//LDLRAP1//FAM123B//LANCL2//BBS5//SH3PXD2A//PHF12//SNX6//SNX27//SNX18//TIAM1//SGIP1
GO:0005154	epidermal growth factor receptor binding	Molecular function	3	19	613	15325	3.94737	0.0382942	0.509355	1.41687	EREG//NRG2//VAV3
GO:0016922	ligand-dependent nuclear receptor binding	Molecular function	3	19	613	15325	3.94737	0.0382942	0.509355	1.41687	NCOA3//ARID1A//PPARGC1A
GO:0030159	receptor signaling complex scaffold activity	Molecular function	3	19	613	15325	3.94737	0.0382942	0.509355	1.41687	SHANK3//MAGI2//LDLRAP1
GO:0045309	protein phosphorylated amino acid binding	Molecular function	3	19	613	15325	3.94737	0.0382942	0.509355	1.41687	CBL//LDLRAP1//NEDD4
GO:0050839	cell adhesion molecule binding	Molecular function	5	47	613	15325	2.65957	0.0388028	0.509355	1.41114	CDH13//ITGB3//SDCBP//EZR//NLGN3
GO:0008170	N-methyltransferase activity	Molecular function	6	63	613	15325	2.38095	0.039608	0.512703	1.40222	TFB1M//RNMT//MLL//WDR5//SETD1B//WDR82
GO:0046914	transition metal ion binding	Molecular function	107	2288	613	15325	1.16914	0.0436433	0.557199	1.36008	KDM3A//SNCA//ZFP36L1//CBL//EGR3//FHL1//NR6A1//GLI2//NR3C1//NBR1//ADAM11//MAP3K1//MID1//MLL//NR3C2//NFX1//PEG3//PLAG1//PLAGL2//PRKCB//RNF2//NR2F2//ZNF711//ZNF148//ZNF192//ZNF200//ADAM12//PDE5A//TNKS//ZNF516//ZEB2//PJA2//SEC24D//MARCH6//PCGF3//ZMYND11//SEC24A//DBF4//ADAMTS5//KAT7//BAZ1A//ZHX1//KLF12//KLF8//ZNF652//RNF44//ZNF507//LIMCH1//PEG10//ATMIN//ZCCHC11//ZDHHC17//SIRT5//SIRT1//ZNF281//ZMYND8//…
GO:0022891	substrate-specific transmembrane transporter activity	Molecular function	44	846	613	15325	1.30024	0.0445549	0.561151	1.3511	SLC25A26//SLC38A1//SLC29A2//SLC6A6//SLC39A14//GRIA2//GABRA1//TRPM7//TTYH3//ANO4//KCNA6//SCN1A//SCN1B//SCN2A//SCN3A//SCN9A//CACNA2D2//KCNK10//KCTD10//KCTD7//CLCC1//CUL5//SLC7A11//SLC38A2//SLC25A22//SLC30A4//SLC30A8//SLC4A4//SLC4A7//TOMM40//TOMM70A//SLC30A9//SLC30A7//SLC41A1//ABCC5//ATP8B1//ATP11A//WNK3//ZDHHC17//MCL1//SLC9A4//TAP2//HNRNPA3//SLC2A12
GO:0015171	amino acid transmembrane transporter activity	Molecular function	6	66	613	15325	2.27273	0.0479935	0.5964	1.31882	SLC25A26//SLC38A1//SLC6A6//SLC25A22//SLC7A11//SLC38A2
GO:0016772	transferase activity, transferring phosphorus-containing groups	Molecular function	48	942	613	15325	1.27389	0.0496506	0.608873	1.30408	DGKZ//REV1//KIAA2022//AK3//DGKG//GK//DLG2//PI4K2B//PIP5KL1//ABL2//ADRBK2//MAP3K1//MAP2K4//MAP3K2//SCYL3//WNK3//MARK1//MARK3//STK4//CDC7//LATS1//ULK2//NUAK1//PIM2//ICK//MAST3//HUNK//TAOK3//CSNK1G1//TRPM7//STK35//HIPK1//BMPR2//PRKCB//EPHB2//FGF5//FGF9//EPHA3//EFNA3//NRG2//IGF2R//NRP1//PIK3R2//PIK3R1//IRS2//ZMYND8//ZCCHC11//N4BP2

## Sheet: Pathway
#Column "PathwayID" stands for Pathway identifiers used in KEGG
#Column "Definition" stands for the definition of the PathwayID
#Column "OriginalWebSite"stands for The map's website,the nodes with red frame and red symbol are associated with the DE genes, green nodes have no significance
#Column "p-value"
"Fisher-Pvalue" stands for the enrichment p-value of the PathwayID used Fisher's exact test
#Column "SelectionCounts" stands for the Count of the DE genes' entities directly associated with the listed PathwayID
#Column "SelectionSize" stands for the total number of the DE genes' entities
#Column "Count" stands for the count of the chosen background population genes' entities associated with the listed PathwayID
#Column "Size" stands for the total number of chosen background population genes' entities
#Column "FDR" stands for the false discovery rate of the PathwayID
#Column "Enrichment_Score" stands for the Enrichment Score value of the PathwayID, it equals "-log10(Pvalue)"
#Column "GENES" stands for the DE genes associated with the PathwayID
PathwayID	Definition	OriginalWebSite	Fisher-Pvalue	SelectionCounts	SelectionSize	Count	Size	FDR	Enrichment_Score	Genes
hsa04360	Axon guidance - Homo sapiens (human)	http://www.genome.jp/kegg-bin/show_pathway?hsa04360+1630+1808+1944+2042+2048+2771+4775+4776+8829+5362+10154+5530+6585+57522+8633+137970	1.57424e-05	16	250	127	6756	0.00442361	4.80293	DCC//DPYSL2//EFNA3//EPHA3//EPHB2//GNAI2//NFATC3//NFATC4//NRP1//PLXNA2//PLXNC1//PPP3CA//SLIT1//SRGAP1//UNC5C//UNC5D
hsa04724	Glutamatergic synapse - Homo sapiens (human)	http://www.genome.jp/kegg-bin/show_pathway?hsa04724+109+157+2752+2771+55970+2891+2913+9456+5331+5530+5579+85358+81539+54407	8.68872e-05	14	250	116	6756	0.0122076	4.06104	ADCY3//ADRBK2//GLUL//GNAI2//GNG12//GRIA2//GRM3//HOMER1//PLCB3//PPP3CA//PRKCB//SHANK3//SLC38A1//SLC38A2
hsa04012	ErbB signaling pathway - Homo sapiens (human)	http://www.genome.jp/kegg-bin/show_pathway?hsa04012+27+867+1399+2069+6416+3084+9542+5295+5296+5579+6654	0.00033126	11	250	87	6756	0.031028	3.47983	ABL2//CBL//CRKL//EREG//MAP2K4//NRG1//NRG2//PIK3R1//PIK3R2//PRKCB//SOS1
hsa04810	Regulation of actin cytoskeleton - Homo sapiens (human)	http://www.genome.jp/kegg-bin/show_pathway?hsa04810+1399+7430+2250+2254+2768+55970+3690+3696+4627+10627+5217+5295+5296+4659+6654+85464+7074+10451	0.00096157	18	250	215	6756	0.0675503	3.01702	CRKL//EZR//FGF5//FGF9//GNA12//GNG12//ITGB3//ITGB8//MYH9//MYL12A//PFN2//PIK3R1//PIK3R2//PPP1R12A//SOS1//SSH2//TIAM1//VAV3
hsa04141	Protein processing in endoplasmic reticulum - Homo sapiens (human)	http://www.genome.jp/kegg-bin/show_pathway?hsa04141+10970+80267+30001+3998+10299+9601+51128+10802+9871+7095+7321+51465+7466+55432	0.00343901	14	250	167	6756	0.193272	2.46357	CKAP4//EDEM3//ERO1L//LMAN1//MARCH6//PDIA4//SAR1B//SEC24A//SEC24D//SEC62//UBE2D1//UBE2J1//WFS1//YOD1
hsa05223	Non-small cell lung cancer - Homo sapiens (human)	http://www.genome.jp/kegg-bin/show_pathway?hsa05223+27436+2309+5295+5296+5579+6654+6789	0.00430239	7	250	56	6756	0.201495	2.36629	EML4//FOXO3//PIK3R1//PIK3R2//PRKCB//SOS1//STK4
hsa04727	GABAergic synapse - Homo sapiens (human)	http://www.genome.jp/kegg-bin/show_pathway?hsa04727+18+109+2554+2752+2771+55970+5579+81539+54407	0.00581848	9	250	90	6756	0.233571	2.23519	ABAT//ADCY3//GABRA1//GLUL//GNAI2//GNG12//PRKCB//SLC38A1//SLC38A2
hsa05032	Morphine addiction - Homo sapiens (human)	http://www.genome.jp/kegg-bin/show_pathway?hsa05032+109+157+2554+2771+55970+5139+5144+5150+5579	0.00720128	9	250	93	6756	0.252945	2.14259	ADCY3//ADRBK2//GABRA1//GNAI2//GNG12//PDE3A//PDE4D//PDE7A//PRKCB
hsa04070	Phosphatidylinositol signaling system - Homo sapiens (human)	http://www.genome.jp/kegg-bin/show_pathway?hsa04070+1608+8525+55300+5295+5296+5331+5579+8871	0.00981353	8	250	81	6756	0.295767	2.00818	DGKG//DGKZ//PI4K2B//PIK3R1//PIK3R2//PLCB3//PRKCB//SYNJ2
hsa04120	Ubiquitin mediated proteolysis - Homo sapiens (human)	http://www.genome.jp/kegg-bin/show_pathway?hsa04120+867+8452+8065+8916+4214+4281+4734+9886+7321+51465+51366	0.0123673	11	250	137	6756	0.295767	1.90773	CBL//CUL3//CUL5//HERC3//MAP3K1//MID1//NEDD4//RHOBTB1//UBE2D1//UBE2J1//UBR5
hsa04919	Thyroid hormone signaling pathway - Homo sapiens (human)	http://www.genome.jp/kegg-bin/show_pathway?hsa04919+2308+3690+9969+8202+9611+4851+5295+5296+5331+5579	0.0124252	10	250	119	6756	0.295767	1.9057	FOXO1//ITGB3//MED13//NCOA3//NCOR1//NOTCH1//PIK3R1//PIK3R2//PLCB3//PRKCB
hsa05206	MicroRNAs in cancer - Homo sapiens (human)	http://www.genome.jp/kegg-bin/show_pathway?hsa05206+659+1399+54541+1788+1944+7430+7976+8660+3690+4170+4851+5296+5579+23411+6654+7078+7148+131405+9839	0.0132241	19	250	296	6756	0.295767	1.87863	BMPR2//CRKL//DDIT4//DNMT3A//EFNA3//EZR//FZD3//IRS2//ITGB3//MCL1//NOTCH1//PIK3R2//PRKCB//SIRT1//SOS1//TIMP3//TNXB//TRIM71//ZEB2
hsa04310	Wnt signaling pathway - Homo sapiens (human)	http://www.genome.jp/kegg-bin/show_pathway?hsa04310+27123+7976+4775+4776+5331+5530+5579+6907+6932+81839+7477	0.0136832	11	250	139	6756	0.295767	1.86381	DKK2//FZD3//NFATC3//NFATC4//PLCB3//PPP3CA//PRKCB//TBL1X//TCF7//VANGL1//WNT7B
hsa04662	B cell receptor signaling pathway - Homo sapiens (human)	http://www.genome.jp/kegg-bin/show_pathway?hsa04662+4775+5295+5296+5530+5579+6654+10451	0.0166102	7	250	72	6756	0.33339	1.77963	NFATC3//PIK3R1//PIK3R2//PPP3CA//PRKCB//SOS1//VAV3
hsa05412	Arrhythmogenic right ventricular cardiomyopathy (ARVC) - Homo sapiens (human)	http://www.genome.jp/kegg-bin/show_pathway?hsa05412+9254+1000+1824+3690+3696+6443+6932	0.0190738	7	250	74	6756	0.33715	1.71956	CACNA2D2//CDH2//DSC2//ITGB3//ITGB8//SGCB//TCF7
hsa05205	Proteoglycans in cancer - Homo sapiens (human)	http://www.genome.jp/kegg-bin/show_pathway?hsa05205+288+867+7430+2250+2254+7976+3690+5295+5296+4659+5579+6654+7074+7078+7477	0.019364	15	250	225	6756	0.33715	1.713	ANK3//CBL//EZR//FGF5//FGF9//FZD3//ITGB3//PIK3R1//PIK3R2//PPP1R12A//PRKCB//SOS1//TIAM1//TIMP3//WNT7B
hsa04971	Gastric acid secretion - Homo sapiens (human)	http://www.genome.jp/kegg-bin/show_pathway?hsa04971+109+7430+2771+54207+5331+5579+389015	0.020397	7	250	75	6756	0.33715	1.69043	ADCY3//EZR//GNAI2//KCNK10//PLCB3//PRKCB//SLC9A4
hsa04062	Chemokine signaling pathway - Homo sapiens (human)	http://www.genome.jp/kegg-bin/show_pathway?hsa04062+109+157+1399+2309+2771+55970+5295+5296+5331+5579+6654+7074+10451	0.0226807	13	250	189	6756	0.337172	1.64434	ADCY3//ADRBK2//CRKL//FOXO3//GNAI2//GNG12//PIK3R1//PIK3R2//PLCB3//PRKCB//SOS1//TIAM1//VAV3
hsa04150	mTOR signaling pathway - Homo sapiens (human)	http://www.genome.jp/kegg-bin/show_pathway?hsa04150+54541+1977+5295+5296+5579+9706	0.0227981	6	250	60	6756	0.337172	1.6421	DDIT4//EIF4E//PIK3R1//PIK3R2//PRKCB//ULK2
hsa04015	Rap1 signaling pathway - Homo sapiens (human)	http://www.genome.jp/kegg-bin/show_pathway?hsa04015+109+1399+1944+2250+2254+2771+3690+9863+5217+5295+5296+5331+5579+7074	0.0261041	14	250	213	6756	0.366762	1.58329	ADCY3//CRKL//EFNA3//FGF5//FGF9//GNAI2//ITGB3//MAGI2//PFN2//PIK3R1//PIK3R2//PLCB3//PRKCB//TIAM1
hsa04010	MAPK signaling pathway - Homo sapiens (human)	http://www.genome.jp/kegg-bin/show_pathway?hsa04010+9254+1399+2250+2254+2768+55970+6416+4214+10746+4763+4775+5530+5579+6654+6789+51347	0.0283708	16	250	257	6756	0.379629	1.54713	CACNA2D2//CRKL//FGF5//FGF9//GNA12//GNG12//MAP2K4//MAP3K1//MAP3K2//NF1//NFATC3//PPP3CA//PRKCB//SOS1//STK4//TAOK3
hsa04910	Insulin signaling pathway - Homo sapiens (human)	http://www.genome.jp/kegg-bin/show_pathway?hsa04910+867+1399+1977+2308+8660+5139+5295+5296+10891+6654	0.0357753	10	250	141	6756	0.445142	1.44642	CBL//CRKL//EIF4E//FOXO1//IRS2//PDE3A//PIK3R1//PIK3R2//PPARGC1A//SOS1
hsa04723	Retrograde endocannabinoid signaling - Homo sapiens (human)	http://www.genome.jp/kegg-bin/show_pathway?hsa04723+109+747+2554+2771+55970+2891+5331+5579	0.0364351	8	250	103	6756	0.445142	1.43848	ADCY3//DAGLA//GABRA1//GNAI2//GNG12//GRIA2//PLCB3//PRKCB
hsa04014	Ras signaling pathway - Homo sapiens (human)	http://www.genome.jp/kegg-bin/show_pathway?hsa04014+27+1944+2250+2254+55970+4763+5295+5296+5579+9462+23179+6654+6789+7074	0.0415344	14	250	227	6756	0.455753	1.38159	ABL2//EFNA3//FGF5//FGF9//GNG12//NF1//PIK3R1//PIK3R2//PRKCB//RASAL2//RGL1//SOS1//STK4//TIAM1
hsa04510	Focal adhesion - Homo sapiens (human)	http://www.genome.jp/kegg-bin/show_pathway?hsa04510+1285+1399+3690+3696+10627+55742+5295+5296+4659+5579+6654+7148+10451	0.0415635	13	250	206	6756	0.455753	1.38129	COL4A3//CRKL//ITGB3//ITGB8//MYL12A//PARVA//PIK3R1//PIK3R2//PPP1R12A//PRKCB//SOS1//TNXB//VAV3
hsa05213	Endometrial cancer - Homo sapiens (human)	http://www.genome.jp/kegg-bin/show_pathway?hsa05213+2309+5295+5296+6654+6932	0.0421693	5	250	52	6756	0.455753	1.375	FOXO3//PIK3R1//PIK3R2//SOS1//TCF7
hsa04664	Fc epsilon RI signaling pathway - Homo sapiens (human)	http://www.genome.jp/kegg-bin/show_pathway?hsa04664+6416+5295+5296+5579+6654+10451	0.044141	6	250	70	6756	0.459393	1.35516	MAP2K4//PIK3R1//PIK3R2//PRKCB//SOS1//VAV3

## Sheet: 735 predict targets
mirbase19	matuacc	mirna_name	genesymbol	genedescription	score	details
hsa-miR-3607-3p	MIMAT0017985	hsa-miR-3607-3p	PLXNA2	plexin A2	-0.15	http://www.targetscan.org/cgi-bin/targetscan/vert_61/view_gene.cgi?taxid=9606&rs=NM_025179&members=miR-3607-3p&showcnc=1&shownc=1&showncf=1
hsa-miR-3607-3p	MIMAT0017985	hsa-miR-3607-3p	GNA12	guanine nucleotide binding protein (G protein) alpha 12	-0.14	http://www.targetscan.org/cgi-bin/targetscan/vert_61/view_gene.cgi?taxid=9606&rs=NM_007353&members=miR-3607-3p&showcnc=1&shownc=1&showncf=1
hsa-miR-3607-3p	MIMAT0017985	hsa-miR-3607-3p	PAFAH1B1	platelet-activating factor acetylhydrolase 1b, regulatory subunit 1 (45kDa)	-0.14	http://www.targetscan.org/cgi-bin/targetscan/vert_61/view_gene.cgi?taxid=9606&rs=NM_000430&members=miR-3607-3p&showcnc=1&shownc=1&showncf=1
hsa-miR-3607-3p	MIMAT0017985	hsa-miR-3607-3p	CDH2	cadherin 2, type 1, N-cadherin (neuronal)	-0.14	http://www.targetscan.org/cgi-bin/targetscan/vert_61/view_gene.cgi?taxid=9606&rs=NM_001792&members=miR-3607-3p&showcnc=1&shownc=1&showncf=1
hsa-miR-3607-3p	MIMAT0017985	hsa-miR-3607-3p	ZC3H12C	zinc finger CCCH-type containing 12C	-0.14	http://www.targetscan.org/cgi-bin/targetscan/vert_61/view_gene.cgi?taxid=9606&rs=NM_033390&members=miR-3607-3p&showcnc=1&shownc=1&showncf=1
hsa-miR-3607-3p	MIMAT0017985	hsa-miR-3607-3p	IER5	immediate early response 5	-0.14	http://www.targetscan.org/cgi-bin/targetscan/vert_61/view_gene.cgi?taxid=9606&rs=NM_016545&members=miR-3607-3p&showcnc=1&shownc=1&showncf=1
hsa-miR-3607-3p	MIMAT0017985	hsa-miR-3607-3p	CCDC6	coiled-coil domain containing 6	-0.14	http://www.targetscan.org/cgi-bin/targetscan/vert_61/view_gene.cgi?taxid=9606&rs=NM_005436&members=miR-3607-3p&showcnc=1&shownc=1&showncf=1
hsa-miR-3607-3p	MIMAT0017985	hsa-miR-3607-3p	BNC2	basonuclin 2	-0.14	http://www.targetscan.org/cgi-bin/targetscan/vert_61/view_gene.cgi?taxid=9606&rs=NM_017637&members=miR-3607-3p&showcnc=1&shownc=1&showncf=1
hsa-miR-3607-3p	MIMAT0017985	hsa-miR-3607-3p	CNN3	calponin 3, acidic	-0.14	http://www.targetscan.org/cgi-bin/targetscan/vert_61/view_gene.cgi?taxid=9606&rs=NM_001839&members=miR-3607-3p&showcnc=1&shownc=1&showncf=1
hsa-miR-3607-3p	MIMAT0017985	hsa-miR-3607-3p	PSTPIP2	proline-serine-threonine phosphatase interacting protein 2	-0.14	http://www.targetscan.org/cgi-bin/targetscan/vert_61/view_gene.cgi?taxid=9606&rs=NM_024430&members=miR-3607-3p&showcnc=1&shownc=1&showncf=1
hsa-miR-3607-3p	MIMAT0017985	hsa-miR-3607-3p	NPY1R	neuropeptide Y receptor Y1	-0.14	http://www.targetscan.org/cgi-bin/targetscan/vert_61/view_gene.cgi?taxid=9606&rs=NM_000909&members=miR-3607-3p&showcnc=1&shownc=1&showncf=1
hsa-miR-3607-3p	MIMAT0017985	hsa-miR-3607-3p	VSTM4	V-set and transmembrane domain containing 4	-0.14	http://www.targetscan.org/cgi-bin/targetscan/vert_61/view_gene.cgi?taxid=9606&rs=NM_001031746&members=miR-3607-3p&showcnc=1&shownc=1&showncf=1
hsa-miR-3607-3p	MIMAT0017985	hsa-miR-3607-3p	PCDH20	protocadherin 20	-0.14	http://www.targetscan.org/cgi-bin/targetscan/vert_61/view_gene.cgi?taxid=9606&rs=NM_022843&members=miR-3607-3p&showcnc=1&shownc=1&showncf=1
hsa-miR-3607-3p	MIMAT0017985	hsa-miR-3607-3p	GNL1	guanine nucleotide binding protein-like 1	-0.14	http://www.targetscan.org/cgi-bin/targetscan/vert_61/view_gene.cgi?taxid=9606&rs=NM_005275&members=miR-3607-3p&showcnc=1&shownc=1&showncf=1
hsa-miR-3607-3p	MIMAT0017985	hsa-miR-3607-3p	C11orf58	chromosome 11 open reading frame 58	-0.14	http://www.targetscan.org/cgi-bin/targetscan/vert_61/view_gene.cgi?taxid=9606&rs=NM_014267&members=miR-3607-3p&showcnc=1&shownc=1&showncf=1
hsa-miR-3607-3p	MIMAT0017985	hsa-miR-3607-3p	TM4SF1	transmembrane 4 L six family member 1	-0.14	http://www.targetscan.org/cgi-bin/targetscan/vert_61/view_gene.cgi?taxid=9606&rs=NM_014220&members=miR-3607-3p&showcnc=1&shownc=1&showncf=1
hsa-miR-3607-3p	MIMAT0017985	hsa-miR-3607-3p	TOMM70A	translocase of outer mitochondrial membrane 70 homolog A (S. cerevisiae)	-0.14	http://www.targetscan.org/cgi-bin/targetscan/vert_61/view_gene.cgi?taxid=9606&rs=NM_014820&members=miR-3607-3p&showcnc=1&shownc=1&showncf=1
hsa-miR-3607-3p	MIMAT0017985	hsa-miR-3607-3p	SLC38A2	solute carrier family 38, member 2	-0.14	http://www.targetscan.org/cgi-bin/targetscan/vert_61/view_gene.cgi?taxid=9606&rs=NM_018976&members=miR-3607-3p&showcnc=1&shownc=1&showncf=1
hsa-miR-3607-3p	MIMAT0017985	hsa-miR-3607-3p	SHOC2	soc-2 suppressor of clear homolog (C. elegans)	-0.05	http://www.targetscan.org/cgi-bin/targetscan/vert_61/view_gene.cgi?taxid=9606&rs=NM_007373&members=miR-3607-3p&showcnc=1&shownc=1&showncf=1
hsa-miR-3607-3p	MIMAT0017985	hsa-miR-3607-3p	CEP44	centrosomal protein 44kDa	-0.05	http://www.targetscan.org/cgi-bin/targetscan/vert_61/view_gene.cgi?taxid=9606&rs=NM_001040157&members=miR-3607-3p&showcnc=1&shownc=1&showncf=1
hsa-miR-3607-3p	MIMAT0017985	hsa-miR-3607-3p	SLC39A14	solute carrier family 39 (zinc transporter), member 14	-0.05	http://www.targetscan.org/cgi-bin/targetscan/vert_61/view_gene.cgi?taxid=9606&rs=NM_001128431&members=miR-3607-3p&showcnc=1&shownc=1&showncf=1
hsa-miR-3607-3p	MIMAT0017985	hsa-miR-3607-3p	FOXK1	forkhead box K1	-0.05	http://www.targetscan.org/cgi-bin/targetscan/vert_61/view_gene.cgi?taxid=9606&rs=NM_001037165&members=miR-3607-3p&showcnc=1&shownc=1&showncf=1
hsa-miR-3607-3p	MIMAT0017985	hsa-miR-3607-3p	PPM1E	protein phosphatase, Mg2+/Mn2+ dependent, 1E	>-0.05	http://www.targetscan.org/cgi-bin/targetscan/vert_61/view_gene.cgi?taxid=9606&rs=NM_014906&members=miR-3607-3p&showcnc=1&shownc=1&showncf=1
hsa-miR-3607-3p	MIMAT0017985	hsa-miR-3607-3p	NEDD4	neural precursor cell expressed, developmentally down-regulated 4	>-0.05	http://www.targetscan.org/cgi-bin/targetscan/vert_61/view_gene.cgi?taxid=9606&rs=NM_006154&members=miR-3607-3p&showcnc=1&shownc=1&showncf=1
hsa-miR-3607-3p	MIMAT0017985	hsa-miR-3607-3p	ZNF445	zinc finger protein 445	>-0.05	http://www.targetscan.org/cgi-bin/targetscan/vert_61/view_gene.cgi?taxid=9606&rs=NM_181489&members=miR-3607-3p&showcnc=1&shownc=1&showncf=1
hsa-miR-3607-3p	MIMAT0017985	hsa-miR-3607-3p	ADAM11	ADAM metallopeptidase domain 11	>-0.05	http://www.targetscan.org/cgi-bin/targetscan/vert_61/view_gene.cgi?taxid=9606&rs=NM_002390&members=miR-3607-3p&showcnc=1&shownc=1&showncf=1
hsa-miR-3607-3p	MIMAT0017985	hsa-miR-3607-3p	CRKL	v-crk sarcoma virus CT10 oncogene homolog (avian)-like	>-0.05	http://www.targetscan.org/cgi-bin/targetscan/vert_61/view_gene.cgi?taxid=9606&rs=NM_005207&members=miR-3607-3p&showcnc=1&shownc=1&showncf=1
hsa-miR-3607-3p	MIMAT0017985	hsa-miR-3607-3p	ADAMTS5	ADAM metallopeptidase with thrombospondin type 1 motif, 5	>-0.05	http://www.targetscan.org/cgi-bin/targetscan/vert_61/view_gene.cgi?taxid=9606&rs=NM_007038&members=miR-3607-3p&showcnc=1&shownc=1&showncf=1
hsa-miR-3607-3p	MIMAT0017985	hsa-miR-3607-3p	ALG9	asparagine-linked glycosylation 9, alpha-1,2-mannosyltransferase homolog (S. cerevisiae)	>-0.05	http://www.targetscan.org/cgi-bin/targetscan/vert_61/view_gene.cgi?taxid=9606&rs=NM_001077690&members=miR-3607-3p&showcnc=1&shownc=1&showncf=1
hsa-miR-3607-3p	MIMAT0017985	hsa-miR-3607-3p	PEG10	paternally expressed 10	>-0.05	http://www.targetscan.org/cgi-bin/targetscan/vert_61/view_gene.cgi?taxid=9606&rs=NM_001040152&members=miR-3607-3p&showcnc=1&shownc=1&showncf=1
hsa-miR-3607-3p	MIMAT0017985	hsa-miR-3607-3p	MKL2	MKL/myocardin-like 2	>-0.05	http://www.targetscan.org/cgi-bin/targetscan/vert_61/view_gene.cgi?taxid=9606&rs=NM_014048&members=miR-3607-3p&showcnc=1&shownc=1&showncf=1
hsa-miR-3607-3p	MIMAT0017985	hsa-miR-3607-3p	NFATC4	nuclear factor of activated T-cells, cytoplasmic, calcineurin-dependent 4	>-0.05	http://www.targetscan.org/cgi-bin/targetscan/vert_61/view_gene.cgi?taxid=9606&rs=NM_001136022&members=miR-3607-3p&showcnc=1&shownc=1&showncf=1
hsa-miR-3607-3p	MIMAT0017985	hsa-miR-3607-3p	CLMN	calmin (calponin-like, transmembrane)	>-0.05	http://www.targetscan.org/cgi-bin/targetscan/vert_61/view_gene.cgi?taxid=9606&rs=NM_024734&members=miR-3607-3p&showcnc=1&shownc=1&showncf=1
hsa-miR-3607-3p	MIMAT0017985	hsa-miR-3607-3p	LIN28B	lin-28 homolog B (C. elegans)	>-0.05	http://www.targetscan.org/cgi-bin/targetscan/vert_61/view_gene.cgi?taxid=9606&rs=NM_001004317&members=miR-3607-3p&showcnc=1&shownc=1&showncf=1
hsa-miR-3607-3p	MIMAT0017985	hsa-miR-3607-3p	LPGAT1	lysophosphatidylglycerol acyltransferase 1	>-0.05	http://www.targetscan.org/cgi-bin/targetscan/vert_61/view_gene.cgi?taxid=9606&rs=NM_014873&members=miR-3607-3p&showcnc=1&shownc=1&showncf=1
hsa-miR-3607-3p	MIMAT0017985	hsa-miR-3607-3p	TNRC6C	trinucleotide repeat containing 6C	>-0.05	http://www.targetscan.org/cgi-bin/targetscan/vert_61/view_gene.cgi?taxid=9606&rs=NM_001142640&members=miR-3607-3p&showcnc=1&shownc=1&showncf=1
hsa-miR-3607-3p	MIMAT0017985	hsa-miR-3607-3p	EPB41L5	erythrocyte membrane protein band 4.1 like 5	-0.74	http://www.targetscan.org/cgi-bin/targetscan/vert_61/view_gene.cgi?taxid=9606&rs=NM_001184938&members=miR-3607-3p&showcnc=1&shownc=1&showncf=1
hsa-miR-3607-3p	MIMAT0017985	hsa-miR-3607-3p	FAM65A	family with sequence similarity 65, member A	-0.57	http://www.targetscan.org/cgi-bin/targetscan/vert_61/view_gene.cgi?taxid=9606&rs=NM_001193522&members=miR-3607-3p&showcnc=1&shownc=1&showncf=1
hsa-miR-3607-3p	MIMAT0017985	hsa-miR-3607-3p	MOSPD1	motile sperm domain containing 1	-0.51	http://www.targetscan.org/cgi-bin/targetscan/vert_61/view_gene.cgi?taxid=9606&rs=NM_019556&members=miR-3607-3p&showcnc=1&shownc=1&showncf=1
hsa-miR-3607-3p	MIMAT0017985	hsa-miR-3607-3p	HIATL1	hippocampus abundant transcript-like 1	-0.49	http://www.targetscan.org/cgi-bin/targetscan/vert_61/view_gene.cgi?taxid=9606&rs=NM_032558&members=miR-3607-3p&showcnc=1&shownc=1&showncf=1
hsa-miR-3607-3p	MIMAT0017985	hsa-miR-3607-3p	CECR2	cat eye syndrome chromosome region, candidate 2	-0.48	http://www.targetscan.org/cgi-bin/targetscan/vert_61/view_gene.cgi?taxid=9606&rs=NM_031413&members=miR-3607-3p&showcnc=1&shownc=1&showncf=1
hsa-miR-3607-3p	MIMAT0017985	hsa-miR-3607-3p	PTPRD	protein tyrosine phosphatase, receptor type, D	-0.47	http://www.targetscan.org/cgi-bin/targetscan/vert_61/view_gene.cgi?taxid=9606&rs=NM_001040712&members=miR-3607-3p&showcnc=1&shownc=1&showncf=1
hsa-miR-3607-3p	MIMAT0017985	hsa-miR-3607-3p	ZCCHC11	zinc finger, CCHC domain containing 11	-0.45	http://www.targetscan.org/cgi-bin/targetscan/vert_61/view_gene.cgi?taxid=9606&rs=NM_001009881&members=miR-3607-3p&showcnc=1&shownc=1&showncf=1
hsa-miR-3607-3p	MIMAT0017985	hsa-miR-3607-3p	TFB1M	transcription factor B1, mitochondrial	-0.44	http://www.targetscan.org/cgi-bin/targetscan/vert_61/view_gene.cgi?taxid=9606&rs=NM_016020&members=miR-3607-3p&showcnc=1&shownc=1&showncf=1
hsa-miR-3607-3p	MIMAT0017985	hsa-miR-3607-3p	UBXN2B	UBX domain protein 2B	-0.44	http://www.targetscan.org/cgi-bin/targetscan/vert_61/view_gene.cgi?taxid=9606&rs=NM_001077619&members=miR-3607-3p&showcnc=1&shownc=1&showncf=1
hsa-miR-3607-3p	MIMAT0017985	hsa-miR-3607-3p	DBF4	DBF4 homolog (S. cerevisiae)	-0.42	http://www.targetscan.org/cgi-bin/targetscan/vert_61/view_gene.cgi?taxid=9606&rs=NM_006716&members=miR-3607-3p&showcnc=1&shownc=1&showncf=1
hsa-miR-3607-3p	MIMAT0017985	hsa-miR-3607-3p	C6orf204	chromosome 6 open reading frame 204	-0.41	http://www.targetscan.org/cgi-bin/targetscan/vert_61/view_gene.cgi?taxid=9606&rs=NM_001042475&members=miR-3607-3p&showcnc=1&shownc=1&showncf=1
hsa-miR-3607-3p	MIMAT0017985	hsa-miR-3607-3p	PELI2	pellino homolog 2 (Drosophila)	-0.4	http://www.targetscan.org/cgi-bin/targetscan/vert_61/view_gene.cgi?taxid=9606&rs=NM_021255&members=miR-3607-3p&showcnc=1&shownc=1&showncf=1
hsa-miR-3607-3p	MIMAT0017985	hsa-miR-3607-3p	LCOR	ligand dependent nuclear receptor corepressor	-0.4	http://www.targetscan.org/cgi-bin/targetscan/vert_61/view_gene.cgi?taxid=9606&rs=NM_001170765&members=miR-3607-3p&showcnc=1&shownc=1&showncf=1
hsa-miR-3607-3p	MIMAT0017985	hsa-miR-3607-3p	KDM3A	lysine (K)-specific demethylase 3A	-0.4	http://www.targetscan.org/cgi-bin/targetscan/vert_61/view_gene.cgi?taxid=9606&rs=NM_001146688&members=miR-3607-3p&showcnc=1&shownc=1&showncf=1
hsa-miR-3607-3p	MIMAT0017985	hsa-miR-3607-3p	MCART6	mitochondrial carrier triple repeat 6	-0.39	http://www.targetscan.org/cgi-bin/targetscan/vert_61/view_gene.cgi?taxid=9606&rs=NM_001012755&members=miR-3607-3p&showcnc=1&shownc=1&showncf=1
hsa-miR-3607-3p	MIMAT0017985	hsa-miR-3607-3p	CLDN10	claudin 10	-0.38	http://www.targetscan.org/cgi-bin/targetscan/vert_61/view_gene.cgi?taxid=9606&rs=NM_001160100&members=miR-3607-3p&showcnc=1&shownc=1&showncf=1
hsa-miR-3607-3p	MIMAT0017985	hsa-miR-3607-3p	SLC38A1	solute carrier family 38, member 1	-0.38	http://www.targetscan.org/cgi-bin/targetscan/vert_61/view_gene.cgi?taxid=9606&rs=NM_001077484&members=miR-3607-3p&showcnc=1&shownc=1&showncf=1
hsa-miR-3607-3p	MIMAT0017985	hsa-miR-3607-3p	PHC3	polyhomeotic homolog 3 (Drosophila)	-0.38	http://www.targetscan.org/cgi-bin/targetscan/vert_61/view_gene.cgi?taxid=9606&rs=NM_024947&members=miR-3607-3p&showcnc=1&shownc=1&showncf=1
hsa-miR-3607-3p	MIMAT0017985	hsa-miR-3607-3p	N4BP2	NEDD4 binding protein 2	-0.38	http://www.targetscan.org/cgi-bin/targetscan/vert_61/view_gene.cgi?taxid=9606&rs=NM_018177&members=miR-3607-3p&showcnc=1&shownc=1&showncf=1
hsa-miR-3607-3p	MIMAT0017985	hsa-miR-3607-3p	EPHA3	EPH receptor A3	-0.37	http://www.targetscan.org/cgi-bin/targetscan/vert_61/view_gene.cgi?taxid=9606&rs=NM_005233&members=miR-3607-3p&showcnc=1&shownc=1&showncf=1
hsa-miR-3607-3p	MIMAT0017985	hsa-miR-3607-3p	PLAGL2	pleiomorphic adenoma gene-like 2	-0.36	http://www.targetscan.org/cgi-bin/targetscan/vert_61/view_gene.cgi?taxid=9606&rs=NM_002657&members=miR-3607-3p&showcnc=1&shownc=1&showncf=1
hsa-miR-3607-3p	MIMAT0017985	hsa-miR-3607-3p	LMBR1	limb region 1 homolog (mouse)	-0.35	http://www.targetscan.org/cgi-bin/targetscan/vert_61/view_gene.cgi?taxid=9606&rs=NM_022458&members=miR-3607-3p&showcnc=1&shownc=1&showncf=1
hsa-miR-3607-3p	MIMAT0017985	hsa-miR-3607-3p	PARVA	parvin, alpha	-0.35	http://www.targetscan.org/cgi-bin/targetscan/vert_61/view_gene.cgi?taxid=9606&rs=NM_018222&members=miR-3607-3p&showcnc=1&shownc=1&showncf=1
hsa-miR-3607-3p	MIMAT0017985	hsa-miR-3607-3p	KLF8	Kruppel-like factor 8	-0.35	http://www.targetscan.org/cgi-bin/targetscan/vert_61/view_gene.cgi?taxid=9606&rs=NM_001159296&members=miR-3607-3p&showcnc=1&shownc=1&showncf=1
hsa-miR-3607-3p	MIMAT0017985	hsa-miR-3607-3p	GAS6	growth arrest-specific 6	-0.34	http://www.targetscan.org/cgi-bin/targetscan/vert_61/view_gene.cgi?taxid=9606&rs=NM_000820&members=miR-3607-3p&showcnc=1&shownc=1&showncf=1
hsa-miR-3607-3p	MIMAT0017985	hsa-miR-3607-3p	CHN1	chimerin (chimaerin) 1	-0.34	http://www.targetscan.org/cgi-bin/targetscan/vert_61/view_gene.cgi?taxid=9606&rs=NM_001025201&members=miR-3607-3p&showcnc=1&shownc=1&showncf=1
hsa-miR-3607-3p	MIMAT0017985	hsa-miR-3607-3p	C7orf60	chromosome 7 open reading frame 60	-0.33	http://www.targetscan.org/cgi-bin/targetscan/vert_61/view_gene.cgi?taxid=9606&rs=NM_152556&members=miR-3607-3p&showcnc=1&shownc=1&showncf=1
hsa-miR-3607-3p	MIMAT0017985	hsa-miR-3607-3p	ZNF654	zinc finger protein 654	-0.33	http://www.targetscan.org/cgi-bin/targetscan/vert_61/view_gene.cgi?taxid=9606&rs=NM_018293&members=miR-3607-3p&showcnc=1&shownc=1&showncf=1
hsa-miR-3607-3p	MIMAT0017985	hsa-miR-3607-3p	SPAST	spastin	-0.33	http://www.targetscan.org/cgi-bin/targetscan/vert_61/view_gene.cgi?taxid=9606&rs=NM_014946&members=miR-3607-3p&showcnc=1&shownc=1&showncf=1
hsa-miR-3607-3p	MIMAT0017985	hsa-miR-3607-3p	SENP5	SUMO1/sentrin specific peptidase 5	-0.33	http://www.targetscan.org/cgi-bin/targetscan/vert_61/view_gene.cgi?taxid=9606&rs=NM_152699&members=miR-3607-3p&showcnc=1&shownc=1&showncf=1
hsa-miR-3607-3p	MIMAT0017985	hsa-miR-3607-3p	KIAA1147	KIAA1147	-0.32	http://www.targetscan.org/cgi-bin/targetscan/vert_61/view_gene.cgi?taxid=9606&rs=NM_001080392&members=miR-3607-3p&showcnc=1&shownc=1&showncf=1
hsa-miR-3607-3p	MIMAT0017985	hsa-miR-3607-3p	NRP1	neuropilin 1	-0.32	http://www.targetscan.org/cgi-bin/targetscan/vert_61/view_gene.cgi?taxid=9606&rs=NM_003873&members=miR-3607-3p&showcnc=1&shownc=1&showncf=1
hsa-miR-3607-3p	MIMAT0017985	hsa-miR-3607-3p	LCORL	ligand dependent nuclear receptor corepressor-like	-0.32	http://www.targetscan.org/cgi-bin/targetscan/vert_61/view_gene.cgi?taxid=9606&rs=NM_001166139&members=miR-3607-3p&showcnc=1&shownc=1&showncf=1
hsa-miR-3607-3p	MIMAT0017985	hsa-miR-3607-3p	BAZ1A	bromodomain adjacent to zinc finger domain, 1A	-0.32	http://www.targetscan.org/cgi-bin/targetscan/vert_61/view_gene.cgi?taxid=9606&rs=NM_013448&members=miR-3607-3p&showcnc=1&shownc=1&showncf=1
hsa-miR-3607-3p	MIMAT0017985	hsa-miR-3607-3p	NBR1	neighbor of BRCA1 gene 1	-0.32	http://www.targetscan.org/cgi-bin/targetscan/vert_61/view_gene.cgi?taxid=9606&rs=NM_005899&members=miR-3607-3p&showcnc=1&shownc=1&showncf=1
hsa-miR-3607-3p	MIMAT0017985	hsa-miR-3607-3p	C5orf35	chromosome 5 open reading frame 35	-0.32	http://www.targetscan.org/cgi-bin/targetscan/vert_61/view_gene.cgi?taxid=9606&rs=NM_153706&members=miR-3607-3p&showcnc=1&shownc=1&showncf=1
hsa-miR-3607-3p	MIMAT0017985	hsa-miR-3607-3p	NR2F2	nuclear receptor subfamily 2, group F, member 2	-0.31	http://www.targetscan.org/cgi-bin/targetscan/vert_61/view_gene.cgi?taxid=9606&rs=NM_001145155&members=miR-3607-3p&showcnc=1&shownc=1&showncf=1
hsa-miR-3607-3p	MIMAT0017985	hsa-miR-3607-3p	SLC30A4	solute carrier family 30 (zinc transporter), member 4	-0.31	http://www.targetscan.org/cgi-bin/targetscan/vert_61/view_gene.cgi?taxid=9606&rs=NM_013309&members=miR-3607-3p&showcnc=1&shownc=1&showncf=1
hsa-miR-3607-3p	MIMAT0017985	hsa-miR-3607-3p	MAGI2	membrane associated guanylate kinase, WW and PDZ domain containing 2	-0.31	http://www.targetscan.org/cgi-bin/targetscan/vert_61/view_gene.cgi?taxid=9606&rs=NM_012301&members=miR-3607-3p&showcnc=1&shownc=1&showncf=1
hsa-miR-3607-3p	MIMAT0017985	hsa-miR-3607-3p	KCNK10	potassium channel, subfamily K, member 10	-0.31	http://www.targetscan.org/cgi-bin/targetscan/vert_61/view_gene.cgi?taxid=9606&rs=NM_021161&members=miR-3607-3p&showcnc=1&shownc=1&showncf=1
hsa-miR-3607-3p	MIMAT0017985	hsa-miR-3607-3p	RAI14	retinoic acid induced 14	-0.3	http://www.targetscan.org/cgi-bin/targetscan/vert_61/view_gene.cgi?taxid=9606&rs=NM_001145520&members=miR-3607-3p&showcnc=1&shownc=1&showncf=1
hsa-miR-3607-3p	MIMAT0017985	hsa-miR-3607-3p	SGCB	sarcoglycan, beta (43kDa dystrophin-associated glycoprotein)	-0.3	http://www.targetscan.org/cgi-bin/targetscan/vert_61/view_gene.cgi?taxid=9606&rs=NM_000232&members=miR-3607-3p&showcnc=1&shownc=1&showncf=1
hsa-miR-3607-3p	MIMAT0017985	hsa-miR-3607-3p	GZF1	GDNF-inducible zinc finger protein 1	-0.3	http://www.targetscan.org/cgi-bin/targetscan/vert_61/view_gene.cgi?taxid=9606&rs=NM_022482&members=miR-3607-3p&showcnc=1&shownc=1&showncf=1
hsa-miR-3607-3p	MIMAT0017985	hsa-miR-3607-3p	DKK2	dickkopf homolog 2 (Xenopus laevis)	-0.3	http://www.targetscan.org/cgi-bin/targetscan/vert_61/view_gene.cgi?taxid=9606&rs=NM_014421&members=miR-3607-3p&showcnc=1&shownc=1&showncf=1
hsa-miR-3607-3p	MIMAT0017985	hsa-miR-3607-3p	HNRNPA3	heterogeneous nuclear ribonucleoprotein A3	-0.3	http://www.targetscan.org/cgi-bin/targetscan/vert_61/view_gene.cgi?taxid=9606&rs=NM_194247&members=miR-3607-3p&showcnc=1&shownc=1&showncf=1
hsa-miR-3607-3p	MIMAT0017985	hsa-miR-3607-3p	NDRG3	NDRG family member 3	-0.3	http://www.targetscan.org/cgi-bin/targetscan/vert_61/view_gene.cgi?taxid=9606&rs=NM_022477&members=miR-3607-3p&showcnc=1&shownc=1&showncf=1
hsa-miR-3607-3p	MIMAT0017985	hsa-miR-3607-3p	TOMM40	translocase of outer mitochondrial membrane 40 homolog (yeast)	-0.3	http://www.targetscan.org/cgi-bin/targetscan/vert_61/view_gene.cgi?taxid=9606&rs=NM_001128916&members=miR-3607-3p&showcnc=1&shownc=1&showncf=1
hsa-miR-3607-3p	MIMAT0017985	hsa-miR-3607-3p	YOD1	YOD1 OTU deubiquinating enzyme 1 homolog (S. cerevisiae)	-0.3	http://www.targetscan.org/cgi-bin/targetscan/vert_61/view_gene.cgi?taxid=9606&rs=NM_018566&members=miR-3607-3p&showcnc=1&shownc=1&showncf=1
hsa-miR-3607-3p	MIMAT0017985	hsa-miR-3607-3p	ZNF684	zinc finger protein 684	-0.3	http://www.targetscan.org/cgi-bin/targetscan/vert_61/view_gene.cgi?taxid=9606&rs=NM_152373&members=miR-3607-3p&showcnc=1&shownc=1&showncf=1
hsa-miR-3607-3p	MIMAT0017985	hsa-miR-3607-3p	P2RY10	purinergic receptor P2Y, G-protein coupled, 10	-0.3	http://www.targetscan.org/cgi-bin/targetscan/vert_61/view_gene.cgi?taxid=9606&rs=NM_014499&members=miR-3607-3p&showcnc=1&shownc=1&showncf=1
hsa-miR-3607-3p	MIMAT0017985	hsa-miR-3607-3p	ZHX1	zinc fingers and homeoboxes 1	-0.29	http://www.targetscan.org/cgi-bin/targetscan/vert_61/view_gene.cgi?taxid=9606&rs=NM_001017926&members=miR-3607-3p&showcnc=1&shownc=1&showncf=1
hsa-miR-3607-3p	MIMAT0017985	hsa-miR-3607-3p	FRG1	FSHD region gene 1	-0.29	http://www.targetscan.org/cgi-bin/targetscan/vert_61/view_gene.cgi?taxid=9606&rs=NM_004477&members=miR-3607-3p&showcnc=1&shownc=1&showncf=1
hsa-miR-3607-3p	MIMAT0017985	hsa-miR-3607-3p	EDNRA	endothelin receptor type A	-0.29	http://www.targetscan.org/cgi-bin/targetscan/vert_61/view_gene.cgi?taxid=9606&rs=NM_001166055&members=miR-3607-3p&showcnc=1&shownc=1&showncf=1
hsa-miR-3607-3p	MIMAT0017985	hsa-miR-3607-3p	SAR1B	SAR1 homolog B (S. cerevisiae)	-0.29	http://www.targetscan.org/cgi-bin/targetscan/vert_61/view_gene.cgi?taxid=9606&rs=NM_001033503&members=miR-3607-3p&showcnc=1&shownc=1&showncf=1
hsa-miR-3607-3p	MIMAT0017985	hsa-miR-3607-3p	C1orf173	chromosome 1 open reading frame 173	-0.29	http://www.targetscan.org/cgi-bin/targetscan/vert_61/view_gene.cgi?taxid=9606&rs=NM_001002912&members=miR-3607-3p&showcnc=1&shownc=1&showncf=1
hsa-miR-3607-3p	MIMAT0017985	hsa-miR-3607-3p	OVOL2	ovo-like 2 (Drosophila)	-0.29	http://www.targetscan.org/cgi-bin/targetscan/vert_61/view_gene.cgi?taxid=9606&rs=NM_021220&members=miR-3607-3p&showcnc=1&shownc=1&showncf=1
hsa-miR-3607-3p	MIMAT0017985	hsa-miR-3607-3p	UNC5C	unc-5 homolog C (C. elegans)	-0.29	http://www.targetscan.org/cgi-bin/targetscan/vert_61/view_gene.cgi?taxid=9606&rs=NM_003728&members=miR-3607-3p&showcnc=1&shownc=1&showncf=1
hsa-miR-3607-3p	MIMAT0017985	hsa-miR-3607-3p	EFHA2	EF-hand domain family, member A2	-0.29	http://www.targetscan.org/cgi-bin/targetscan/vert_61/view_gene.cgi?taxid=9606&rs=NM_181723&members=miR-3607-3p&showcnc=1&shownc=1&showncf=1
hsa-miR-3607-3p	MIMAT0017985	hsa-miR-3607-3p	TMEM48	transmembrane protein 48	-0.29	http://www.targetscan.org/cgi-bin/targetscan/vert_61/view_gene.cgi?taxid=9606&rs=NM_001168551&members=miR-3607-3p&showcnc=1&shownc=1&showncf=1
hsa-miR-3607-3p	MIMAT0017985	hsa-miR-3607-3p	COTL1	coactosin-like 1 (Dictyostelium)	-0.28	http://www.targetscan.org/cgi-bin/targetscan/vert_61/view_gene.cgi?taxid=9606&rs=NM_021149&members=miR-3607-3p&showcnc=1&shownc=1&showncf=1
hsa-miR-3607-3p	MIMAT0017985	hsa-miR-3607-3p	HDGFRP3	hepatoma-derived growth factor, related protein 3	-0.28	http://www.targetscan.org/cgi-bin/targetscan/vert_61/view_gene.cgi?taxid=9606&rs=NM_016073&members=miR-3607-3p&showcnc=1&shownc=1&showncf=1
hsa-miR-3607-3p	MIMAT0017985	hsa-miR-3607-3p	CHD9	chromodomain helicase DNA binding protein 9	-0.28	http://www.targetscan.org/cgi-bin/targetscan/vert_61/view_gene.cgi?taxid=9606&rs=NM_025134&members=miR-3607-3p&showcnc=1&shownc=1&showncf=1
hsa-miR-3607-3p	MIMAT0017985	hsa-miR-3607-3p	RAB7A	RAB7A, member RAS oncogene family	-0.28	http://www.targetscan.org/cgi-bin/targetscan/vert_61/view_gene.cgi?taxid=9606&rs=NM_004637&members=miR-3607-3p&showcnc=1&shownc=1&showncf=1
hsa-miR-3607-3p	MIMAT0017985	hsa-miR-3607-3p	RIC8B	resistance to inhibitors of cholinesterase 8 homolog B (C. elegans)	-0.28	http://www.targetscan.org/cgi-bin/targetscan/vert_61/view_gene.cgi?taxid=9606&rs=NM_018157&members=miR-3607-3p&showcnc=1&shownc=1&showncf=1
hsa-miR-3607-3p	MIMAT0017985	hsa-miR-3607-3p	ARSJ	arylsulfatase family, member J	-0.28	http://www.targetscan.org/cgi-bin/targetscan/vert_61/view_gene.cgi?taxid=9606&rs=NM_024590&members=miR-3607-3p&showcnc=1&shownc=1&showncf=1
hsa-miR-3607-3p	MIMAT0017985	hsa-miR-3607-3p	MMD	monocyte to macrophage differentiation-associated	-0.28	http://www.targetscan.org/cgi-bin/targetscan/vert_61/view_gene.cgi?taxid=9606&rs=NM_012329&members=miR-3607-3p&showcnc=1&shownc=1&showncf=1
hsa-miR-3607-3p	MIMAT0017985	hsa-miR-3607-3p	REV1	REV1 homolog (S. cerevisiae)	-0.27	http://www.targetscan.org/cgi-bin/targetscan/vert_61/view_gene.cgi?taxid=9606&rs=NM_001037872&members=miR-3607-3p&showcnc=1&shownc=1&showncf=1
hsa-miR-3607-3p	MIMAT0017985	hsa-miR-3607-3p	FAM73A	family with sequence similarity 73, member A	-0.27	http://www.targetscan.org/cgi-bin/targetscan/vert_61/view_gene.cgi?taxid=9606&rs=NM_198549&members=miR-3607-3p&showcnc=1&shownc=1&showncf=1
hsa-miR-3607-3p	MIMAT0017985	hsa-miR-3607-3p	ADRA2A	adrenergic, alpha-2A-, receptor	-0.27	http://www.targetscan.org/cgi-bin/targetscan/vert_61/view_gene.cgi?taxid=9606&rs=NM_000681&members=miR-3607-3p&showcnc=1&shownc=1&showncf=1
hsa-miR-3607-3p	MIMAT0017985	hsa-miR-3607-3p	STX2	syntaxin 2	-0.27	http://www.targetscan.org/cgi-bin/targetscan/vert_61/view_gene.cgi?taxid=9606&rs=NM_001980&members=miR-3607-3p&showcnc=1&shownc=1&showncf=1
hsa-miR-3607-3p	MIMAT0017985	hsa-miR-3607-3p	GPBP1L1	GC-rich promoter binding protein 1-like 1	-0.27	http://www.targetscan.org/cgi-bin/targetscan/vert_61/view_gene.cgi?taxid=9606&rs=NM_021639&members=miR-3607-3p&showcnc=1&shownc=1&showncf=1
hsa-miR-3607-3p	MIMAT0017985	hsa-miR-3607-3p	RALGPS2	Ral GEF with PH domain and SH3 binding motif 2	-0.27	http://www.targetscan.org/cgi-bin/targetscan/vert_61/view_gene.cgi?taxid=9606&rs=NM_152663&members=miR-3607-3p&showcnc=1&shownc=1&showncf=1
hsa-miR-3607-3p	MIMAT0017985	hsa-miR-3607-3p	EN2	engrailed homeobox 2	-0.27	http://www.targetscan.org/cgi-bin/targetscan/vert_61/view_gene.cgi?taxid=9606&rs=NM_001427&members=miR-3607-3p&showcnc=1&shownc=1&showncf=1
hsa-miR-3607-3p	MIMAT0017985	hsa-miR-3607-3p	ESCO1	establishment of cohesion 1 homolog 1 (S. cerevisiae)	-0.27	http://www.targetscan.org/cgi-bin/targetscan/vert_61/view_gene.cgi?taxid=9606&rs=NM_052911&members=miR-3607-3p&showcnc=1&shownc=1&showncf=1
hsa-miR-3607-3p	MIMAT0017985	hsa-miR-3607-3p	H1F0	H1 histone family, member 0	-0.27	http://www.targetscan.org/cgi-bin/targetscan/vert_61/view_gene.cgi?taxid=9606&rs=NM_005318&members=miR-3607-3p&showcnc=1&shownc=1&showncf=1
hsa-miR-3607-3p	MIMAT0017985	hsa-miR-3607-3p	LYZ	lysozyme	-0.26	http://www.targetscan.org/cgi-bin/targetscan/vert_61/view_gene.cgi?taxid=9606&rs=NM_000239&members=miR-3607-3p&showcnc=1&shownc=1&showncf=1
hsa-miR-3607-3p	MIMAT0017985	hsa-miR-3607-3p	PI4K2B	phosphatidylinositol 4-kinase type 2 beta	-0.26	http://www.targetscan.org/cgi-bin/targetscan/vert_61/view_gene.cgi?taxid=9606&rs=NM_018323&members=miR-3607-3p&showcnc=1&shownc=1&showncf=1
hsa-miR-3607-3p	MIMAT0017985	hsa-miR-3607-3p	TRIM71	tripartite motif containing 71	-0.26	http://www.targetscan.org/cgi-bin/targetscan/vert_61/view_gene.cgi?taxid=9606&rs=NM_001039111&members=miR-3607-3p&showcnc=1&shownc=1&showncf=1
hsa-miR-3607-3p	MIMAT0017985	hsa-miR-3607-3p	NOTCH1	notch 1	-0.26	http://www.targetscan.org/cgi-bin/targetscan/vert_61/view_gene.cgi?taxid=9606&rs=NM_017617&members=miR-3607-3p&showcnc=1&shownc=1&showncf=1
hsa-miR-3607-3p	MIMAT0017985	hsa-miR-3607-3p	TMX3	thioredoxin-related transmembrane protein 3	-0.26	http://www.targetscan.org/cgi-bin/targetscan/vert_61/view_gene.cgi?taxid=9606&rs=NM_019022&members=miR-3607-3p&showcnc=1&shownc=1&showncf=1
hsa-miR-3607-3p	MIMAT0017985	hsa-miR-3607-3p	SLC44A3	solute carrier family 44, member 3	-0.26	http://www.targetscan.org/cgi-bin/targetscan/vert_61/view_gene.cgi?taxid=9606&rs=NM_001114106&members=miR-3607-3p&showcnc=1&shownc=1&showncf=1
hsa-miR-3607-3p	MIMAT0017985	hsa-miR-3607-3p	LRP8	low density lipoprotein receptor-related protein 8, apolipoprotein e receptor	-0.26	http://www.targetscan.org/cgi-bin/targetscan/vert_61/view_gene.cgi?taxid=9606&rs=NM_001018054&members=miR-3607-3p&showcnc=1&shownc=1&showncf=1
hsa-miR-3607-3p	MIMAT0017985	hsa-miR-3607-3p	GALNT3	UDP-N-acetyl-alpha-D-galactosamine:polypeptide N-acetylgalactosaminyltransferase 3 (GalNAc-T3)	-0.26	http://www.targetscan.org/cgi-bin/targetscan/vert_61/view_gene.cgi?taxid=9606&rs=NM_004482&members=miR-3607-3p&showcnc=1&shownc=1&showncf=1
hsa-miR-3607-3p	MIMAT0017985	hsa-miR-3607-3p	AEBP2	AE binding protein 2	-0.26	http://www.targetscan.org/cgi-bin/targetscan/vert_61/view_gene.cgi?taxid=9606&rs=NM_001114176&members=miR-3607-3p&showcnc=1&shownc=1&showncf=1
hsa-miR-3607-3p	MIMAT0017985	hsa-miR-3607-3p	HTR1F	5-hydroxytryptamine (serotonin) receptor 1F	-0.26	http://www.targetscan.org/cgi-bin/targetscan/vert_61/view_gene.cgi?taxid=9606&rs=NM_000866&members=miR-3607-3p&showcnc=1&shownc=1&showncf=1
hsa-miR-3607-3p	MIMAT0017985	hsa-miR-3607-3p	ARHGAP24	Rho GTPase activating protein 24	-0.25	http://www.targetscan.org/cgi-bin/targetscan/vert_61/view_gene.cgi?taxid=9606&rs=NM_001025616&members=miR-3607-3p&showcnc=1&shownc=1&showncf=1
hsa-miR-3607-3p	MIMAT0017985	hsa-miR-3607-3p	C16orf74	chromosome 16 open reading frame 74	-0.25	http://www.targetscan.org/cgi-bin/targetscan/vert_61/view_gene.cgi?taxid=9606&rs=NM_206967&members=miR-3607-3p&showcnc=1&shownc=1&showncf=1
hsa-miR-3607-3p	MIMAT0017985	hsa-miR-3607-3p	CALB2	calbindin 2	-0.25	http://www.targetscan.org/cgi-bin/targetscan/vert_61/view_gene.cgi?taxid=9606&rs=NM_001740&members=miR-3607-3p&showcnc=1&shownc=1&showncf=1
hsa-miR-3607-3p	MIMAT0017985	hsa-miR-3607-3p	C7orf42	chromosome 7 open reading frame 42	-0.25	http://www.targetscan.org/cgi-bin/targetscan/vert_61/view_gene.cgi?taxid=9606&rs=NM_017994&members=miR-3607-3p&showcnc=1&shownc=1&showncf=1
hsa-miR-3607-3p	MIMAT0017985	hsa-miR-3607-3p	PHF12	PHD finger protein 12	-0.25	http://www.targetscan.org/cgi-bin/targetscan/vert_61/view_gene.cgi?taxid=9606&rs=NM_001033561&members=miR-3607-3p&showcnc=1&shownc=1&showncf=1
hsa-miR-3607-3p	MIMAT0017985	hsa-miR-3607-3p	FNDC3B	fibronectin type III domain containing 3B	-0.25	http://www.targetscan.org/cgi-bin/targetscan/vert_61/view_gene.cgi?taxid=9606&rs=NM_001135095&members=miR-3607-3p&showcnc=1&shownc=1&showncf=1
hsa-miR-3607-3p	MIMAT0017985	hsa-miR-3607-3p	SH2B3	SH2B adaptor protein 3	-0.25	http://www.targetscan.org/cgi-bin/targetscan/vert_61/view_gene.cgi?taxid=9606&rs=NM_005475&members=miR-3607-3p&showcnc=1&shownc=1&showncf=1
hsa-miR-3607-3p	MIMAT0017985	hsa-miR-3607-3p	BCKDHB	branched chain keto acid dehydrogenase E1, beta polypeptide	-0.25	http://www.targetscan.org/cgi-bin/targetscan/vert_61/view_gene.cgi?taxid=9606&rs=NM_183050&members=miR-3607-3p&showcnc=1&shownc=1&showncf=1
hsa-miR-3607-3p	MIMAT0017985	hsa-miR-3607-3p	FGF5	fibroblast growth factor 5	-0.25	http://www.targetscan.org/cgi-bin/targetscan/vert_61/view_gene.cgi?taxid=9606&rs=NM_004464&members=miR-3607-3p&showcnc=1&shownc=1&showncf=1
hsa-miR-3607-3p	MIMAT0017985	hsa-miR-3607-3p	ZNF148	zinc finger protein 148	-0.24	http://www.targetscan.org/cgi-bin/targetscan/vert_61/view_gene.cgi?taxid=9606&rs=NM_021964&members=miR-3607-3p&showcnc=1&shownc=1&showncf=1
hsa-miR-3607-3p	MIMAT0017985	hsa-miR-3607-3p	DSCR4	Down syndrome critical region gene 4	-0.24	http://www.targetscan.org/cgi-bin/targetscan/vert_61/view_gene.cgi?taxid=9606&rs=NM_005867&members=miR-3607-3p&showcnc=1&shownc=1&showncf=1
hsa-miR-3607-3p	MIMAT0017985	hsa-miR-3607-3p	METTL4	methyltransferase like 4	-0.24	http://www.targetscan.org/cgi-bin/targetscan/vert_61/view_gene.cgi?taxid=9606&rs=NM_022840&members=miR-3607-3p&showcnc=1&shownc=1&showncf=1
hsa-miR-3607-3p	MIMAT0017985	hsa-miR-3607-3p	TMEM108	transmembrane protein 108	-0.24	http://www.targetscan.org/cgi-bin/targetscan/vert_61/view_gene.cgi?taxid=9606&rs=NM_001136469&members=miR-3607-3p&showcnc=1&shownc=1&showncf=1
hsa-miR-3607-3p	MIMAT0017985	hsa-miR-3607-3p	ATP8B1	ATPase, aminophospholipid transporter, class I, type 8B, member 1	-0.24	http://www.targetscan.org/cgi-bin/targetscan/vert_61/view_gene.cgi?taxid=9606&rs=NM_005603&members=miR-3607-3p&showcnc=1&shownc=1&showncf=1
hsa-miR-3607-3p	MIMAT0017985	hsa-miR-3607-3p	ACTL7B	actin-like 7B	-0.24	http://www.targetscan.org/cgi-bin/targetscan/vert_61/view_gene.cgi?taxid=9606&rs=NM_006686&members=miR-3607-3p&showcnc=1&shownc=1&showncf=1
hsa-miR-3607-3p	MIMAT0017985	hsa-miR-3607-3p	ZNF281	zinc finger protein 281	-0.24	http://www.targetscan.org/cgi-bin/targetscan/vert_61/view_gene.cgi?taxid=9606&rs=NM_012482&members=miR-3607-3p&showcnc=1&shownc=1&showncf=1
hsa-miR-3607-3p	MIMAT0017985	hsa-miR-3607-3p	BTF3L4	basic transcription factor 3-like 4	-0.24	http://www.targetscan.org/cgi-bin/targetscan/vert_61/view_gene.cgi?taxid=9606&rs=NM_001136497&members=miR-3607-3p&showcnc=1&shownc=1&showncf=1
hsa-miR-3607-3p	MIMAT0017985	hsa-miR-3607-3p	NIPBL	Nipped-B homolog (Drosophila)	-0.24	http://www.targetscan.org/cgi-bin/targetscan/vert_61/view_gene.cgi?taxid=9606&rs=NM_015384&members=miR-3607-3p&showcnc=1&shownc=1&showncf=1
hsa-miR-3607-3p	MIMAT0017985	hsa-miR-3607-3p	ATMIN	ATM interactor	-0.24	http://www.targetscan.org/cgi-bin/targetscan/vert_61/view_gene.cgi?taxid=9606&rs=NM_015251&members=miR-3607-3p&showcnc=1&shownc=1&showncf=1
hsa-miR-3607-3p	MIMAT0017985	hsa-miR-3607-3p	ATXN7L1	ataxin 7-like 1	-0.24	http://www.targetscan.org/cgi-bin/targetscan/vert_61/view_gene.cgi?taxid=9606&rs=NM_020725&members=miR-3607-3p&showcnc=1&shownc=1&showncf=1
hsa-miR-3607-3p	MIMAT0017985	hsa-miR-3607-3p	PDIA4	protein disulfide isomerase family A, member 4	-0.24	http://www.targetscan.org/cgi-bin/targetscan/vert_61/view_gene.cgi?taxid=9606&rs=NM_004911&members=miR-3607-3p&showcnc=1&shownc=1&showncf=1
hsa-miR-3607-3p	MIMAT0017985	hsa-miR-3607-3p	LANCL2	LanC lantibiotic synthetase component C-like 2 (bacterial)	-0.24	http://www.targetscan.org/cgi-bin/targetscan/vert_61/view_gene.cgi?taxid=9606&rs=NM_018697&members=miR-3607-3p&showcnc=1&shownc=1&showncf=1
hsa-miR-3607-3p	MIMAT0017985	hsa-miR-3607-3p	CDH11	cadherin 11, type 2, OB-cadherin (osteoblast)	-0.23	http://www.targetscan.org/cgi-bin/targetscan/vert_61/view_gene.cgi?taxid=9606&rs=NM_001797&members=miR-3607-3p&showcnc=1&shownc=1&showncf=1
hsa-miR-3607-3p	MIMAT0017985	hsa-miR-3607-3p	BSDC1	BSD domain containing 1	-0.23	http://www.targetscan.org/cgi-bin/targetscan/vert_61/view_gene.cgi?taxid=9606&rs=NM_001143888&members=miR-3607-3p&showcnc=1&shownc=1&showncf=1
hsa-miR-3607-3p	MIMAT0017985	hsa-miR-3607-3p	KLF12	Kruppel-like factor 12	-0.23	http://www.targetscan.org/cgi-bin/targetscan/vert_61/view_gene.cgi?taxid=9606&rs=NM_007249&members=miR-3607-3p&showcnc=1&shownc=1&showncf=1
hsa-miR-3607-3p	MIMAT0017985	hsa-miR-3607-3p	RNF2	ring finger protein 2	-0.23	http://www.targetscan.org/cgi-bin/targetscan/vert_61/view_gene.cgi?taxid=9606&rs=NM_007212&members=miR-3607-3p&showcnc=1&shownc=1&showncf=1
hsa-miR-3607-3p	MIMAT0017985	hsa-miR-3607-3p	CEBPD	CCAAT/enhancer binding protein (C/EBP), delta	-0.23	http://www.targetscan.org/cgi-bin/targetscan/vert_61/view_gene.cgi?taxid=9606&rs=NM_005195&members=miR-3607-3p&showcnc=1&shownc=1&showncf=1
hsa-miR-3607-3p	MIMAT0017985	hsa-miR-3607-3p	AQP11	aquaporin 11	-0.23	http://www.targetscan.org/cgi-bin/targetscan/vert_61/view_gene.cgi?taxid=9606&rs=NM_173039&members=miR-3607-3p&showcnc=1&shownc=1&showncf=1
hsa-miR-3607-3p	MIMAT0017985	hsa-miR-3607-3p	DPP8	dipeptidyl-peptidase 8	-0.23	http://www.targetscan.org/cgi-bin/targetscan/vert_61/view_gene.cgi?taxid=9606&rs=NM_017743&members=miR-3607-3p&showcnc=1&shownc=1&showncf=1
hsa-miR-3607-3p	MIMAT0017985	hsa-miR-3607-3p	UPP2	uridine phosphorylase 2	-0.23	http://www.targetscan.org/cgi-bin/targetscan/vert_61/view_gene.cgi?taxid=9606&rs=NM_001135098&members=miR-3607-3p&showcnc=1&shownc=1&showncf=1
hsa-miR-3607-3p	MIMAT0017985	hsa-miR-3607-3p	SSH2	slingshot homolog 2 (Drosophila)	-0.23	http://www.targetscan.org/cgi-bin/targetscan/vert_61/view_gene.cgi?taxid=9606&rs=NM_033389&members=miR-3607-3p&showcnc=1&shownc=1&showncf=1
hsa-miR-3607-3p	MIMAT0017985	hsa-miR-3607-3p	FXR1	fragile X mental retardation, autosomal homolog 1	-0.23	http://www.targetscan.org/cgi-bin/targetscan/vert_61/view_gene.cgi?taxid=9606&rs=NM_001013438&members=miR-3607-3p&showcnc=1&shownc=1&showncf=1
hsa-miR-3607-3p	MIMAT0017985	hsa-miR-3607-3p	WDR52	WD repeat domain 52	-0.23	http://www.targetscan.org/cgi-bin/targetscan/vert_61/view_gene.cgi?taxid=9606&rs=NM_001164496&members=miR-3607-3p&showcnc=1&shownc=1&showncf=1
hsa-miR-3607-3p	MIMAT0017985	hsa-miR-3607-3p	PCGF6	polycomb group ring finger 6	-0.23	http://www.targetscan.org/cgi-bin/targetscan/vert_61/view_gene.cgi?taxid=9606&rs=NM_001011663&members=miR-3607-3p&showcnc=1&shownc=1&showncf=1
hsa-miR-3607-3p	MIMAT0017985	hsa-miR-3607-3p	TNKS	tankyrase, TRF1-interacting ankyrin-related ADP-ribose polymerase	-0.22	http://www.targetscan.org/cgi-bin/targetscan/vert_61/view_gene.cgi?taxid=9606&rs=NM_003747&members=miR-3607-3p&showcnc=1&shownc=1&showncf=1
hsa-miR-3607-3p	MIMAT0017985	hsa-miR-3607-3p	FHL1	four and a half LIM domains 1	-0.22	http://www.targetscan.org/cgi-bin/targetscan/vert_61/view_gene.cgi?taxid=9606&rs=NM_001159699&members=miR-3607-3p&showcnc=1&shownc=1&showncf=1
hsa-miR-3607-3p	MIMAT0017985	hsa-miR-3607-3p	VPS54	vacuolar protein sorting 54 homolog (S. cerevisiae)	-0.22	http://www.targetscan.org/cgi-bin/targetscan/vert_61/view_gene.cgi?taxid=9606&rs=NM_001005739&members=miR-3607-3p&showcnc=1&shownc=1&showncf=1
hsa-miR-3607-3p	MIMAT0017985	hsa-miR-3607-3p	ERLIN1	ER lipid raft associated 1	-0.22	http://www.targetscan.org/cgi-bin/targetscan/vert_61/view_gene.cgi?taxid=9606&rs=NM_001100626&members=miR-3607-3p&showcnc=1&shownc=1&showncf=1
hsa-miR-3607-3p	MIMAT0017985	hsa-miR-3607-3p	SLC4A4	solute carrier family 4, sodium bicarbonate cotransporter, member 4	-0.22	http://www.targetscan.org/cgi-bin/targetscan/vert_61/view_gene.cgi?taxid=9606&rs=NM_001098484&members=miR-3607-3p&showcnc=1&shownc=1&showncf=1
hsa-miR-3607-3p	MIMAT0017985	hsa-miR-3607-3p	UNKL	unkempt homolog (Drosophila)-like	-0.22	http://www.targetscan.org/cgi-bin/targetscan/vert_61/view_gene.cgi?taxid=9606&rs=NM_001193388&members=miR-3607-3p&showcnc=1&shownc=1&showncf=1
hsa-miR-3607-3p	MIMAT0017985	hsa-miR-3607-3p	AMPH	amphiphysin	-0.22	http://www.targetscan.org/cgi-bin/targetscan/vert_61/view_gene.cgi?taxid=9606&rs=NM_001635&members=miR-3607-3p&showcnc=1&shownc=1&showncf=1
hsa-miR-3607-3p	MIMAT0017985	hsa-miR-3607-3p	RPE65	retinal pigment epithelium-specific protein 65kDa	-0.22	http://www.targetscan.org/cgi-bin/targetscan/vert_61/view_gene.cgi?taxid=9606&rs=NM_000329&members=miR-3607-3p&showcnc=1&shownc=1&showncf=1
hsa-miR-3607-3p	MIMAT0017985	hsa-miR-3607-3p	C8orf83	chromosome 8 open reading frame 83	-0.22	http://www.targetscan.org/cgi-bin/targetscan/vert_61/view_gene.cgi?taxid=9606&rs=NM_001171795&members=miR-3607-3p&showcnc=1&shownc=1&showncf=1
hsa-miR-3607-3p	MIMAT0017985	hsa-miR-3607-3p	HDHD2	haloacid dehalogenase-like hydrolase domain containing 2	-0.22	http://www.targetscan.org/cgi-bin/targetscan/vert_61/view_gene.cgi?taxid=9606&rs=NM_032124&members=miR-3607-3p&showcnc=1&shownc=1&showncf=1
hsa-miR-3607-3p	MIMAT0017985	hsa-miR-3607-3p	CSMD3	CUB and Sushi multiple domains 3	-0.22	http://www.targetscan.org/cgi-bin/targetscan/vert_61/view_gene.cgi?taxid=9606&rs=NM_052900&members=miR-3607-3p&showcnc=1&shownc=1&showncf=1
hsa-miR-3607-3p	MIMAT0017985	hsa-miR-3607-3p	E2F4	E2F transcription factor 4, p107/p130-binding	-0.22	http://www.targetscan.org/cgi-bin/targetscan/vert_61/view_gene.cgi?taxid=9606&rs=NM_001950&members=miR-3607-3p&showcnc=1&shownc=1&showncf=1
hsa-miR-3607-3p	MIMAT0017985	hsa-miR-3607-3p	DNAJC16	DnaJ (Hsp40) homolog, subfamily C, member 16	-0.21	http://www.targetscan.org/cgi-bin/targetscan/vert_61/view_gene.cgi?taxid=9606&rs=NM_015291&members=miR-3607-3p&showcnc=1&shownc=1&showncf=1
hsa-miR-3607-3p	MIMAT0017985	hsa-miR-3607-3p	PDE5A	phosphodiesterase 5A, cGMP-specific	-0.21	http://www.targetscan.org/cgi-bin/targetscan/vert_61/view_gene.cgi?taxid=9606&rs=NM_001083&members=miR-3607-3p&showcnc=1&shownc=1&showncf=1
hsa-miR-3607-3p	MIMAT0017985	hsa-miR-3607-3p	KAT7	K(lysine) acetyltransferase 7	-0.21	http://www.targetscan.org/cgi-bin/targetscan/vert_61/view_gene.cgi?taxid=9606&rs=NM_001199155&members=miR-3607-3p&showcnc=1&shownc=1&showncf=1
hsa-miR-3607-3p	MIMAT0017985	hsa-miR-3607-3p	DCAF6	DDB1 and CUL4 associated factor 6	-0.21	http://www.targetscan.org/cgi-bin/targetscan/vert_61/view_gene.cgi?taxid=9606&rs=NM_001017977&members=miR-3607-3p&showcnc=1&shownc=1&showncf=1
hsa-miR-3607-3p	MIMAT0017985	hsa-miR-3607-3p	KIAA1919	KIAA1919	-0.21	http://www.targetscan.org/cgi-bin/targetscan/vert_61/view_gene.cgi?taxid=9606&rs=NM_153369&members=miR-3607-3p&showcnc=1&shownc=1&showncf=1
hsa-miR-3607-3p	MIMAT0017985	hsa-miR-3607-3p	LRRTM1	leucine rich repeat transmembrane neuronal 1	-0.21	http://www.targetscan.org/cgi-bin/targetscan/vert_61/view_gene.cgi?taxid=9606&rs=NM_178839&members=miR-3607-3p&showcnc=1&shownc=1&showncf=1
hsa-miR-3607-3p	MIMAT0017985	hsa-miR-3607-3p	NR6A1	nuclear receptor subfamily 6, group A, member 1	-0.21	http://www.targetscan.org/cgi-bin/targetscan/vert_61/view_gene.cgi?taxid=9606&rs=NM_001489&members=miR-3607-3p&showcnc=1&shownc=1&showncf=1
hsa-miR-3607-3p	MIMAT0017985	hsa-miR-3607-3p	PFN2	profilin 2	-0.21	http://www.targetscan.org/cgi-bin/targetscan/vert_61/view_gene.cgi?taxid=9606&rs=NM_002628&members=miR-3607-3p&showcnc=1&shownc=1&showncf=1
hsa-miR-3607-3p	MIMAT0017985	hsa-miR-3607-3p	EVI5	ecotropic viral integration site 5	-0.21	http://www.targetscan.org/cgi-bin/targetscan/vert_61/view_gene.cgi?taxid=9606&rs=NM_005665&members=miR-3607-3p&showcnc=1&shownc=1&showncf=1
hsa-miR-3607-3p	MIMAT0017985	hsa-miR-3607-3p	CTHRC1	collagen triple helix repeat containing 1	-0.21	http://www.targetscan.org/cgi-bin/targetscan/vert_61/view_gene.cgi?taxid=9606&rs=NM_138455&members=miR-3607-3p&showcnc=1&shownc=1&showncf=1
hsa-miR-3607-3p	MIMAT0017985	hsa-miR-3607-3p	MRVI1	murine retrovirus integration site 1 homolog	-0.21	http://www.targetscan.org/cgi-bin/targetscan/vert_61/view_gene.cgi?taxid=9606&rs=NM_001098579&members=miR-3607-3p&showcnc=1&shownc=1&showncf=1
hsa-miR-3607-3p	MIMAT0017985	hsa-miR-3607-3p	KLRG1	killer cell lectin-like receptor subfamily G, member 1	-0.21	http://www.targetscan.org/cgi-bin/targetscan/vert_61/view_gene.cgi?taxid=9606&rs=NM_005810&members=miR-3607-3p&showcnc=1&shownc=1&showncf=1
hsa-miR-3607-3p	MIMAT0017985	hsa-miR-3607-3p	MZT1	mitotic spindle organizing protein 1	-0.21	http://www.targetscan.org/cgi-bin/targetscan/vert_61/view_gene.cgi?taxid=9606&rs=NM_001071775&members=miR-3607-3p&showcnc=1&shownc=1&showncf=1
hsa-miR-3607-3p	MIMAT0017985	hsa-miR-3607-3p	TAF12	TAF12 RNA polymerase II, TATA box binding protein (TBP)-associated factor, 20kDa	-0.2	http://www.targetscan.org/cgi-bin/targetscan/vert_61/view_gene.cgi?taxid=9606&rs=NM_001135218&members=miR-3607-3p&showcnc=1&shownc=1&showncf=1
hsa-miR-3607-3p	MIMAT0017985	hsa-miR-3607-3p	EIF2C4	eukaryotic translation initiation factor 2C, 4	-0.2	http://www.targetscan.org/cgi-bin/targetscan/vert_61/view_gene.cgi?taxid=9606&rs=NM_017629&members=miR-3607-3p&showcnc=1&shownc=1&showncf=1
hsa-miR-3607-3p	MIMAT0017985	hsa-miR-3607-3p	PRPF40A	PRP40 pre-mRNA processing factor 40 homolog A (S. cerevisiae)	-0.2	http://www.targetscan.org/cgi-bin/targetscan/vert_61/view_gene.cgi?taxid=9606&rs=NM_017892&members=miR-3607-3p&showcnc=1&shownc=1&showncf=1
hsa-miR-3607-3p	MIMAT0017985	hsa-miR-3607-3p	MINPP1	multiple inositol-polyphosphate phosphatase 1	-0.2	http://www.targetscan.org/cgi-bin/targetscan/vert_61/view_gene.cgi?taxid=9606&rs=NM_001178117&members=miR-3607-3p&showcnc=1&shownc=1&showncf=1
hsa-miR-3607-3p	MIMAT0017985	hsa-miR-3607-3p	MOBKL3	MOB1, Mps One Binder kinase activator-like 3 (yeast)	-0.2	http://www.targetscan.org/cgi-bin/targetscan/vert_61/view_gene.cgi?taxid=9606&rs=NM_001100819&members=miR-3607-3p&showcnc=1&shownc=1&showncf=1
hsa-miR-3607-3p	MIMAT0017985	hsa-miR-3607-3p	HSPE1-MOBKL3	HSPE1-MOBKL3 readthrough	-0.2	http://www.targetscan.org/cgi-bin/targetscan/vert_61/view_gene.cgi?taxid=9606&rs=NM_001202485&members=miR-3607-3p&showcnc=1&shownc=1&showncf=1
hsa-miR-3607-3p	MIMAT0017985	hsa-miR-3607-3p	ZMYND11	zinc finger, MYND-type containing 11	-0.2	http://www.targetscan.org/cgi-bin/targetscan/vert_61/view_gene.cgi?taxid=9606&rs=NM_001202464&members=miR-3607-3p&showcnc=1&shownc=1&showncf=1
hsa-miR-3607-3p	MIMAT0017985	hsa-miR-3607-3p	PIP5KL1	phosphatidylinositol-4-phosphate 5-kinase-like 1	-0.2	http://www.targetscan.org/cgi-bin/targetscan/vert_61/view_gene.cgi?taxid=9606&rs=NM_001135219&members=miR-3607-3p&showcnc=1&shownc=1&showncf=1
hsa-miR-3607-3p	MIMAT0017985	hsa-miR-3607-3p	C20orf112	chromosome 20 open reading frame 112	-0.2	http://www.targetscan.org/cgi-bin/targetscan/vert_61/view_gene.cgi?taxid=9606&rs=NM_080616&members=miR-3607-3p&showcnc=1&shownc=1&showncf=1
hsa-miR-3607-3p	MIMAT0017985	hsa-miR-3607-3p	PDZD7	PDZ domain containing 7	-0.2	http://www.targetscan.org/cgi-bin/targetscan/vert_61/view_gene.cgi?taxid=9606&rs=NM_001195263&members=miR-3607-3p&showcnc=1&shownc=1&showncf=1
hsa-miR-3607-3p	MIMAT0017985	hsa-miR-3607-3p	LRIG1	leucine-rich repeats and immunoglobulin-like domains 1	-0.2	http://www.targetscan.org/cgi-bin/targetscan/vert_61/view_gene.cgi?taxid=9606&rs=NM_015541&members=miR-3607-3p&showcnc=1&shownc=1&showncf=1
hsa-miR-3607-3p	MIMAT0017985	hsa-miR-3607-3p	TRAPPC3	trafficking protein particle complex 3	-0.2	http://www.targetscan.org/cgi-bin/targetscan/vert_61/view_gene.cgi?taxid=9606&rs=NM_014408&members=miR-3607-3p&showcnc=1&shownc=1&showncf=1
hsa-miR-3607-3p	MIMAT0017985	hsa-miR-3607-3p	PABPC4L	poly(A) binding protein, cytoplasmic 4-like	-0.2	http://www.targetscan.org/cgi-bin/targetscan/vert_61/view_gene.cgi?taxid=9606&rs=NM_001114734&members=miR-3607-3p&showcnc=1&shownc=1&showncf=1
hsa-miR-3607-3p	MIMAT0017985	hsa-miR-3607-3p	UBN1	ubinuclein 1	-0.2	http://www.targetscan.org/cgi-bin/targetscan/vert_61/view_gene.cgi?taxid=9606&rs=NM_001079514&members=miR-3607-3p&showcnc=1&shownc=1&showncf=1
hsa-miR-3607-3p	MIMAT0017985	hsa-miR-3607-3p	MFSD11	major facilitator superfamily domain containing 11	-0.2	http://www.targetscan.org/cgi-bin/targetscan/vert_61/view_gene.cgi?taxid=9606&rs=NM_001242532&members=miR-3607-3p&showcnc=1&shownc=1&showncf=1
hsa-miR-3607-3p	MIMAT0017985	hsa-miR-3607-3p	PRKCB	protein kinase C, beta	-0.2	http://www.targetscan.org/cgi-bin/targetscan/vert_61/view_gene.cgi?taxid=9606&rs=NM_002738&members=miR-3607-3p&showcnc=1&shownc=1&showncf=1
hsa-miR-3607-3p	MIMAT0017985	hsa-miR-3607-3p	COG2	component of oligomeric golgi complex 2	-0.2	http://www.targetscan.org/cgi-bin/targetscan/vert_61/view_gene.cgi?taxid=9606&rs=NM_001145036&members=miR-3607-3p&showcnc=1&shownc=1&showncf=1
hsa-miR-3607-3p	MIMAT0017985	hsa-miR-3607-3p	BBS5	Bardet-Biedl syndrome 5	-0.2	http://www.targetscan.org/cgi-bin/targetscan/vert_61/view_gene.cgi?taxid=9606&rs=NM_152384&members=miR-3607-3p&showcnc=1&shownc=1&showncf=1
hsa-miR-3607-3p	MIMAT0017985	hsa-miR-3607-3p	ANKRD28	ankyrin repeat domain 28	-0.2	http://www.targetscan.org/cgi-bin/targetscan/vert_61/view_gene.cgi?taxid=9606&rs=NM_001195098&members=miR-3607-3p&showcnc=1&shownc=1&showncf=1
hsa-miR-3607-3p	MIMAT0017985	hsa-miR-3607-3p	EDEM3	ER degradation enhancer, mannosidase alpha-like 3	-0.2	http://www.targetscan.org/cgi-bin/targetscan/vert_61/view_gene.cgi?taxid=9606&rs=NM_025191&members=miR-3607-3p&showcnc=1&shownc=1&showncf=1
hsa-miR-3607-3p	MIMAT0017985	hsa-miR-3607-3p	ZNF192	zinc finger protein 192	-0.2	http://www.targetscan.org/cgi-bin/targetscan/vert_61/view_gene.cgi?taxid=9606&rs=NM_006298&members=miR-3607-3p&showcnc=1&shownc=1&showncf=1
hsa-miR-3607-3p	MIMAT0017985	hsa-miR-3607-3p	XPO7	exportin 7	-0.2	http://www.targetscan.org/cgi-bin/targetscan/vert_61/view_gene.cgi?taxid=9606&rs=NM_015024&members=miR-3607-3p&showcnc=1&shownc=1&showncf=1
hsa-miR-3607-3p	MIMAT0017985	hsa-miR-3607-3p	SEL1L3	sel-1 suppressor of lin-12-like 3 (C. elegans)	-0.2	http://www.targetscan.org/cgi-bin/targetscan/vert_61/view_gene.cgi?taxid=9606&rs=NM_015187&members=miR-3607-3p&showcnc=1&shownc=1&showncf=1
hsa-miR-3607-3p	MIMAT0017985	hsa-miR-3607-3p	NECAB1	N-terminal EF-hand calcium binding protein 1	-0.2	http://www.targetscan.org/cgi-bin/targetscan/vert_61/view_gene.cgi?taxid=9606&rs=NM_022351&members=miR-3607-3p&showcnc=1&shownc=1&showncf=1
hsa-miR-3607-3p	MIMAT0017985	hsa-miR-3607-3p	SCN1B	sodium channel, voltage-gated, type I, beta	-0.2	http://www.targetscan.org/cgi-bin/targetscan/vert_61/view_gene.cgi?taxid=9606&rs=NM_001037&members=miR-3607-3p&showcnc=1&shownc=1&showncf=1
hsa-miR-3607-3p	MIMAT0017985	hsa-miR-3607-3p	YTHDF2	YTH domain family, member 2	-0.2	http://www.targetscan.org/cgi-bin/targetscan/vert_61/view_gene.cgi?taxid=9606&rs=NM_001172828&members=miR-3607-3p&showcnc=1&shownc=1&showncf=1
hsa-miR-3607-3p	MIMAT0017985	hsa-miR-3607-3p	MCL1	myeloid cell leukemia sequence 1 (BCL2-related)	-0.2	http://www.targetscan.org/cgi-bin/targetscan/vert_61/view_gene.cgi?taxid=9606&rs=NM_001197320&members=miR-3607-3p&showcnc=1&shownc=1&showncf=1
hsa-miR-3607-3p	MIMAT0017985	hsa-miR-3607-3p	SLC6A6	solute carrier family 6 (neurotransmitter transporter, taurine), member 6	-0.19	http://www.targetscan.org/cgi-bin/targetscan/vert_61/view_gene.cgi?taxid=9606&rs=NM_001134367&members=miR-3607-3p&showcnc=1&shownc=1&showncf=1
hsa-miR-3607-3p	MIMAT0017985	hsa-miR-3607-3p	TAF4B	TAF4b RNA polymerase II, TATA box binding protein (TBP)-associated factor, 105kDa	-0.19	http://www.targetscan.org/cgi-bin/targetscan/vert_61/view_gene.cgi?taxid=9606&rs=NM_005640&members=miR-3607-3p&showcnc=1&shownc=1&showncf=1
hsa-miR-3607-3p	MIMAT0017985	hsa-miR-3607-3p	LIN7C	lin-7 homolog C (C. elegans)	-0.19	http://www.targetscan.org/cgi-bin/targetscan/vert_61/view_gene.cgi?taxid=9606&rs=NM_018362&members=miR-3607-3p&showcnc=1&shownc=1&showncf=1
hsa-miR-3607-3p	MIMAT0017985	hsa-miR-3607-3p	TMEFF1	transmembrane protein with EGF-like and two follistatin-like domains 1	-0.19	http://www.targetscan.org/cgi-bin/targetscan/vert_61/view_gene.cgi?taxid=9606&rs=NM_003692&members=miR-3607-3p&showcnc=1&shownc=1&showncf=1
hsa-miR-3607-3p	MIMAT0017985	hsa-miR-3607-3p	C9orf30-TMEFF1	C9orf30-TMEFF1 readthrough	-0.19	http://www.targetscan.org/cgi-bin/targetscan/vert_61/view_gene.cgi?taxid=9606&rs=NM_001198812&members=miR-3607-3p&showcnc=1&shownc=1&showncf=1
hsa-miR-3607-3p	MIMAT0017985	hsa-miR-3607-3p	ZNF395	zinc finger protein 395	-0.19	http://www.targetscan.org/cgi-bin/targetscan/vert_61/view_gene.cgi?taxid=9606&rs=NM_018660&members=miR-3607-3p&showcnc=1&shownc=1&showncf=1
hsa-miR-3607-3p	MIMAT0017985	hsa-miR-3607-3p	PBRM1	polybromo 1	-0.19	http://www.targetscan.org/cgi-bin/targetscan/vert_61/view_gene.cgi?taxid=9606&rs=NM_018165&members=miR-3607-3p&showcnc=1&shownc=1&showncf=1
hsa-miR-3607-3p	MIMAT0017985	hsa-miR-3607-3p	FSTL4	follistatin-like 4	-0.19	http://www.targetscan.org/cgi-bin/targetscan/vert_61/view_gene.cgi?taxid=9606&rs=NM_015082&members=miR-3607-3p&showcnc=1&shownc=1&showncf=1
hsa-miR-3607-3p	MIMAT0017985	hsa-miR-3607-3p	BRWD3	bromodomain and WD repeat domain containing 3	-0.19	http://www.targetscan.org/cgi-bin/targetscan/vert_61/view_gene.cgi?taxid=9606&rs=NM_153252&members=miR-3607-3p&showcnc=1&shownc=1&showncf=1
hsa-miR-3607-3p	MIMAT0017985	hsa-miR-3607-3p	ZDHHC17	zinc finger, DHHC-type containing 17	-0.19	http://www.targetscan.org/cgi-bin/targetscan/vert_61/view_gene.cgi?taxid=9606&rs=NM_015336&members=miR-3607-3p&showcnc=1&shownc=1&showncf=1
hsa-miR-3607-3p	MIMAT0017985	hsa-miR-3607-3p	ARHGEF10	Rho guanine nucleotide exchange factor (GEF) 10	-0.19	http://www.targetscan.org/cgi-bin/targetscan/vert_61/view_gene.cgi?taxid=9606&rs=NM_014629&members=miR-3607-3p&showcnc=1&shownc=1&showncf=1
hsa-miR-3607-3p	MIMAT0017985	hsa-miR-3607-3p	BOD1L	biorientation of chromosomes in cell division 1-like	-0.19	http://www.targetscan.org/cgi-bin/targetscan/vert_61/view_gene.cgi?taxid=9606&rs=NM_148894&members=miR-3607-3p&showcnc=1&shownc=1&showncf=1
hsa-miR-3607-3p	MIMAT0017985	hsa-miR-3607-3p	SIRT1	sirtuin 1	-0.19	http://www.targetscan.org/cgi-bin/targetscan/vert_61/view_gene.cgi?taxid=9606&rs=NM_001142498&members=miR-3607-3p&showcnc=1&shownc=1&showncf=1
hsa-miR-3607-3p	MIMAT0017985	hsa-miR-3607-3p	ENDOD1	endonuclease domain containing 1	-0.19	http://www.targetscan.org/cgi-bin/targetscan/vert_61/view_gene.cgi?taxid=9606&rs=NM_015036&members=miR-3607-3p&showcnc=1&shownc=1&showncf=1
hsa-miR-3607-3p	MIMAT0017985	hsa-miR-3607-3p	SEC24D	SEC24 family, member D (S. cerevisiae)	-0.19	http://www.targetscan.org/cgi-bin/targetscan/vert_61/view_gene.cgi?taxid=9606&rs=NM_014822&members=miR-3607-3p&showcnc=1&shownc=1&showncf=1
hsa-miR-3607-3p	MIMAT0017985	hsa-miR-3607-3p	CKAP4	cytoskeleton-associated protein 4	-0.19	http://www.targetscan.org/cgi-bin/targetscan/vert_61/view_gene.cgi?taxid=9606&rs=NM_006825&members=miR-3607-3p&showcnc=1&shownc=1&showncf=1
hsa-miR-3607-3p	MIMAT0017985	hsa-miR-3607-3p	C5orf24	chromosome 5 open reading frame 24	-0.19	http://www.targetscan.org/cgi-bin/targetscan/vert_61/view_gene.cgi?taxid=9606&rs=NM_001135586&members=miR-3607-3p&showcnc=1&shownc=1&showncf=1
hsa-miR-3607-3p	MIMAT0017985	hsa-miR-3607-3p	GPD1L	glycerol-3-phosphate dehydrogenase 1-like	-0.19	http://www.targetscan.org/cgi-bin/targetscan/vert_61/view_gene.cgi?taxid=9606&rs=NM_015141&members=miR-3607-3p&showcnc=1&shownc=1&showncf=1
hsa-miR-3607-3p	MIMAT0017985	hsa-miR-3607-3p	STYX	serine/threonine/tyrosine interacting protein	-0.18	http://www.targetscan.org/cgi-bin/targetscan/vert_61/view_gene.cgi?taxid=9606&rs=NM_001130701&members=miR-3607-3p&showcnc=1&shownc=1&showncf=1
hsa-miR-3607-3p	MIMAT0017985	hsa-miR-3607-3p	SEC62	SEC62 homolog (S. cerevisiae)	-0.18	http://www.targetscan.org/cgi-bin/targetscan/vert_61/view_gene.cgi?taxid=9606&rs=NM_003262&members=miR-3607-3p&showcnc=1&shownc=1&showncf=1
hsa-miR-3607-3p	MIMAT0017985	hsa-miR-3607-3p	LOC253044	hypothetical protein LOC253044	-0.18	http://www.targetscan.org/cgi-bin/targetscan/vert_61/view_gene.cgi?taxid=9606&rs=NM_001242772&members=miR-3607-3p&showcnc=1&shownc=1&showncf=1
hsa-miR-3607-3p	MIMAT0017985	hsa-miR-3607-3p	NRG1	neuregulin 1	-0.18	http://www.targetscan.org/cgi-bin/targetscan/vert_61/view_gene.cgi?taxid=9606&rs=NM_001159995&members=miR-3607-3p&showcnc=1&shownc=1&showncf=1
hsa-miR-3607-3p	MIMAT0017985	hsa-miR-3607-3p	PURB	purine-rich element binding protein B	-0.18	http://www.targetscan.org/cgi-bin/targetscan/vert_61/view_gene.cgi?taxid=9606&rs=NM_033224&members=miR-3607-3p&showcnc=1&shownc=1&showncf=1
hsa-miR-3607-3p	MIMAT0017985	hsa-miR-3607-3p	MYH9	myosin, heavy chain 9, non-muscle	-0.18	http://www.targetscan.org/cgi-bin/targetscan/vert_61/view_gene.cgi?taxid=9606&rs=NM_002473&members=miR-3607-3p&showcnc=1&shownc=1&showncf=1
hsa-miR-3607-3p	MIMAT0017985	hsa-miR-3607-3p	SOSTDC1	sclerostin domain containing 1	-0.18	http://www.targetscan.org/cgi-bin/targetscan/vert_61/view_gene.cgi?taxid=9606&rs=NM_015464&members=miR-3607-3p&showcnc=1&shownc=1&showncf=1
hsa-miR-3607-3p	MIMAT0017985	hsa-miR-3607-3p	GDF6	growth differentiation factor 6	-0.18	http://www.targetscan.org/cgi-bin/targetscan/vert_61/view_gene.cgi?taxid=9606&rs=NM_001001557&members=miR-3607-3p&showcnc=1&shownc=1&showncf=1
hsa-miR-3607-3p	MIMAT0017985	hsa-miR-3607-3p	AP3M1	adaptor-related protein complex 3, mu 1 subunit	-0.18	http://www.targetscan.org/cgi-bin/targetscan/vert_61/view_gene.cgi?taxid=9606&rs=NM_012095&members=miR-3607-3p&showcnc=1&shownc=1&showncf=1
hsa-miR-3607-3p	MIMAT0017985	hsa-miR-3607-3p	C19orf50	chromosome 19 open reading frame 50	-0.18	http://www.targetscan.org/cgi-bin/targetscan/vert_61/view_gene.cgi?taxid=9606&rs=NM_001171948&members=miR-3607-3p&showcnc=1&shownc=1&showncf=1
hsa-miR-3607-3p	MIMAT0017985	hsa-miR-3607-3p	ADCY3	adenylate cyclase 3	-0.18	http://www.targetscan.org/cgi-bin/targetscan/vert_61/view_gene.cgi?taxid=9606&rs=NM_004036&members=miR-3607-3p&showcnc=1&shownc=1&showncf=1
hsa-miR-3607-3p	MIMAT0017985	hsa-miR-3607-3p	ALKBH5	alkB, alkylation repair homolog 5 (E. coli)	-0.18	http://www.targetscan.org/cgi-bin/targetscan/vert_61/view_gene.cgi?taxid=9606&rs=NM_017758&members=miR-3607-3p&showcnc=1&shownc=1&showncf=1
hsa-miR-3607-3p	MIMAT0017985	hsa-miR-3607-3p	CALU	calumenin	-0.18	http://www.targetscan.org/cgi-bin/targetscan/vert_61/view_gene.cgi?taxid=9606&rs=NM_001130674&members=miR-3607-3p&showcnc=1&shownc=1&showncf=1
hsa-miR-3607-3p	MIMAT0017985	hsa-miR-3607-3p	ADRBK2	adrenergic, beta, receptor kinase 2	-0.18	http://www.targetscan.org/cgi-bin/targetscan/vert_61/view_gene.cgi?taxid=9606&rs=NM_005160&members=miR-3607-3p&showcnc=1&shownc=1&showncf=1
hsa-miR-3607-3p	MIMAT0017985	hsa-miR-3607-3p	SYNJ2	synaptojanin 2	-0.18	http://www.targetscan.org/cgi-bin/targetscan/vert_61/view_gene.cgi?taxid=9606&rs=NM_001178088&members=miR-3607-3p&showcnc=1&shownc=1&showncf=1
hsa-miR-3607-3p	MIMAT0017985	hsa-miR-3607-3p	C9orf5	chromosome 9 open reading frame 5	-0.18	http://www.targetscan.org/cgi-bin/targetscan/vert_61/view_gene.cgi?taxid=9606&rs=NM_032012&members=miR-3607-3p&showcnc=1&shownc=1&showncf=1
hsa-miR-3607-3p	MIMAT0017985	hsa-miR-3607-3p	EZR	ezrin	-0.18	http://www.targetscan.org/cgi-bin/targetscan/vert_61/view_gene.cgi?taxid=9606&rs=NM_001111077&members=miR-3607-3p&showcnc=1&shownc=1&showncf=1
hsa-miR-3607-3p	MIMAT0017985	hsa-miR-3607-3p	CUL5	cullin 5	-0.18	http://www.targetscan.org/cgi-bin/targetscan/vert_61/view_gene.cgi?taxid=9606&rs=NM_003478&members=miR-3607-3p&showcnc=1&shownc=1&showncf=1
hsa-miR-3607-3p	MIMAT0017985	hsa-miR-3607-3p	IRS2	insulin receptor substrate 2	-0.18	http://www.targetscan.org/cgi-bin/targetscan/vert_61/view_gene.cgi?taxid=9606&rs=NM_003749&members=miR-3607-3p&showcnc=1&shownc=1&showncf=1
hsa-miR-3607-3p	MIMAT0017985	hsa-miR-3607-3p	TAOK3	TAO kinase 3	-0.18	http://www.targetscan.org/cgi-bin/targetscan/vert_61/view_gene.cgi?taxid=9606&rs=NM_016281&members=miR-3607-3p&showcnc=1&shownc=1&showncf=1
hsa-miR-3607-3p	MIMAT0017985	hsa-miR-3607-3p	HIAT1	hippocampus abundant transcript 1	-0.18	http://www.targetscan.org/cgi-bin/targetscan/vert_61/view_gene.cgi?taxid=9606&rs=NM_033055&members=miR-3607-3p&showcnc=1&shownc=1&showncf=1
hsa-miR-3607-3p	MIMAT0017985	hsa-miR-3607-3p	ANK3	ankyrin 3, node of Ranvier (ankyrin G)	-0.18	http://www.targetscan.org/cgi-bin/targetscan/vert_61/view_gene.cgi?taxid=9606&rs=NM_001149&members=miR-3607-3p&showcnc=1&shownc=1&showncf=1
hsa-miR-3607-3p	MIMAT0017985	hsa-miR-3607-3p	UCP3	uncoupling protein 3 (mitochondrial, proton carrier)	-0.18	http://www.targetscan.org/cgi-bin/targetscan/vert_61/view_gene.cgi?taxid=9606&rs=NM_003356&members=miR-3607-3p&showcnc=1&shownc=1&showncf=1
hsa-miR-3607-3p	MIMAT0017985	hsa-miR-3607-3p	AK3	adenylate kinase 3	-0.18	http://www.targetscan.org/cgi-bin/targetscan/vert_61/view_gene.cgi?taxid=9606&rs=NM_001199852&members=miR-3607-3p&showcnc=1&shownc=1&showncf=1
hsa-miR-3607-3p	MIMAT0017985	hsa-miR-3607-3p	FMNL2	formin-like 2	-0.18	http://www.targetscan.org/cgi-bin/targetscan/vert_61/view_gene.cgi?taxid=9606&rs=NM_052905&members=miR-3607-3p&showcnc=1&shownc=1&showncf=1
hsa-miR-3607-3p	MIMAT0017985	hsa-miR-3607-3p	SNCA	synuclein, alpha (non A4 component of amyloid precursor)	-0.17	http://www.targetscan.org/cgi-bin/targetscan/vert_61/view_gene.cgi?taxid=9606&rs=NM_000345&members=miR-3607-3p&showcnc=1&shownc=1&showncf=1
hsa-miR-3607-3p	MIMAT0017985	hsa-miR-3607-3p	FZD3	frizzled family receptor 3	-0.17	http://www.targetscan.org/cgi-bin/targetscan/vert_61/view_gene.cgi?taxid=9606&rs=NM_017412&members=miR-3607-3p&showcnc=1&shownc=1&showncf=1
hsa-miR-3607-3p	MIMAT0017985	hsa-miR-3607-3p	SDCBP	syndecan binding protein (syntenin)	-0.17	http://www.targetscan.org/cgi-bin/targetscan/vert_61/view_gene.cgi?taxid=9606&rs=NM_001007067&members=miR-3607-3p&showcnc=1&shownc=1&showncf=1
hsa-miR-3607-3p	MIMAT0017985	hsa-miR-3607-3p	CPEB3	cytoplasmic polyadenylation element binding protein 3	-0.17	http://www.targetscan.org/cgi-bin/targetscan/vert_61/view_gene.cgi?taxid=9606&rs=NM_001178137&members=miR-3607-3p&showcnc=1&shownc=1&showncf=1
hsa-miR-3607-3p	MIMAT0017985	hsa-miR-3607-3p	IGSF9	immunoglobulin superfamily, member 9	-0.17	http://www.targetscan.org/cgi-bin/targetscan/vert_61/view_gene.cgi?taxid=9606&rs=NM_001135050&members=miR-3607-3p&showcnc=1&shownc=1&showncf=1
hsa-miR-3607-3p	MIMAT0017985	hsa-miR-3607-3p	DLX5	distal-less homeobox 5	-0.17	http://www.targetscan.org/cgi-bin/targetscan/vert_61/view_gene.cgi?taxid=9606&rs=NM_005221&members=miR-3607-3p&showcnc=1&shownc=1&showncf=1
hsa-miR-3607-3p	MIMAT0017985	hsa-miR-3607-3p	C14orf118	chromosome 14 open reading frame 118	-0.17	http://www.targetscan.org/cgi-bin/targetscan/vert_61/view_gene.cgi?taxid=9606&rs=NM_017926&members=miR-3607-3p&showcnc=1&shownc=1&showncf=1
hsa-miR-3607-3p	MIMAT0017985	hsa-miR-3607-3p	FOXN3	forkhead box N3	-0.17	http://www.targetscan.org/cgi-bin/targetscan/vert_61/view_gene.cgi?taxid=9606&rs=NM_001085471&members=miR-3607-3p&showcnc=1&shownc=1&showncf=1
hsa-miR-3607-3p	MIMAT0017985	hsa-miR-3607-3p	GJB1	gap junction protein, beta 1, 32kDa	-0.17	http://www.targetscan.org/cgi-bin/targetscan/vert_61/view_gene.cgi?taxid=9606&rs=NM_000166&members=miR-3607-3p&showcnc=1&shownc=1&showncf=1
hsa-miR-3607-3p	MIMAT0017985	hsa-miR-3607-3p	KLF3	Kruppel-like factor 3 (basic)	-0.17	http://www.targetscan.org/cgi-bin/targetscan/vert_61/view_gene.cgi?taxid=9606&rs=NM_016531&members=miR-3607-3p&showcnc=1&shownc=1&showncf=1
hsa-miR-3607-3p	MIMAT0017985	hsa-miR-3607-3p	SCN1A	sodium channel, voltage-gated, type I, alpha subunit	-0.17	http://www.targetscan.org/cgi-bin/targetscan/vert_61/view_gene.cgi?taxid=9606&rs=NM_001165963&members=miR-3607-3p&showcnc=1&shownc=1&showncf=1
hsa-miR-3607-3p	MIMAT0017985	hsa-miR-3607-3p	RND3	Rho family GTPase 3	-0.17	http://www.targetscan.org/cgi-bin/targetscan/vert_61/view_gene.cgi?taxid=9606&rs=NM_005168&members=miR-3607-3p&showcnc=1&shownc=1&showncf=1
hsa-miR-3607-3p	MIMAT0017985	hsa-miR-3607-3p	DHX15	DEAH (Asp-Glu-Ala-His) box polypeptide 15	-0.17	http://www.targetscan.org/cgi-bin/targetscan/vert_61/view_gene.cgi?taxid=9606&rs=NM_001358&members=miR-3607-3p&showcnc=1&shownc=1&showncf=1
hsa-miR-3607-3p	MIMAT0017985	hsa-miR-3607-3p	FAM46A	family with sequence similarity 46, member A	-0.17	http://www.targetscan.org/cgi-bin/targetscan/vert_61/view_gene.cgi?taxid=9606&rs=NM_017633&members=miR-3607-3p&showcnc=1&shownc=1&showncf=1
hsa-miR-3607-3p	MIMAT0017985	hsa-miR-3607-3p	ZNF711	zinc finger protein 711	-0.17	http://www.targetscan.org/cgi-bin/targetscan/vert_61/view_gene.cgi?taxid=9606&rs=NM_021998&members=miR-3607-3p&showcnc=1&shownc=1&showncf=1
hsa-miR-3607-3p	MIMAT0017985	hsa-miR-3607-3p	NAGPA	N-acetylglucosamine-1-phosphodiester alpha-N-acetylglucosaminidase	-0.17	http://www.targetscan.org/cgi-bin/targetscan/vert_61/view_gene.cgi?taxid=9606&rs=NM_016256&members=miR-3607-3p&showcnc=1&shownc=1&showncf=1
hsa-miR-3607-3p	MIMAT0017985	hsa-miR-3607-3p	MREG	melanoregulin	-0.17	http://www.targetscan.org/cgi-bin/targetscan/vert_61/view_gene.cgi?taxid=9606&rs=NM_018000&members=miR-3607-3p&showcnc=1&shownc=1&showncf=1
hsa-miR-3607-3p	MIMAT0017985	hsa-miR-3607-3p	PGP	phosphoglycolate phosphatase	-0.17	http://www.targetscan.org/cgi-bin/targetscan/vert_61/view_gene.cgi?taxid=9606&rs=NM_001042371&members=miR-3607-3p&showcnc=1&shownc=1&showncf=1
hsa-miR-3607-3p	MIMAT0017985	hsa-miR-3607-3p	MIER1	mesoderm induction early response 1 homolog (Xenopus laevis)	-0.17	http://www.targetscan.org/cgi-bin/targetscan/vert_61/view_gene.cgi?taxid=9606&rs=NM_001077700&members=miR-3607-3p&showcnc=1&shownc=1&showncf=1
hsa-miR-3607-3p	MIMAT0017985	hsa-miR-3607-3p	GMFB	glia maturation factor, beta	-0.17	http://www.targetscan.org/cgi-bin/targetscan/vert_61/view_gene.cgi?taxid=9606&rs=NM_004124&members=miR-3607-3p&showcnc=1&shownc=1&showncf=1
hsa-miR-3607-3p	MIMAT0017985	hsa-miR-3607-3p	ANO4	anoctamin 4	-0.17	http://www.targetscan.org/cgi-bin/targetscan/vert_61/view_gene.cgi?taxid=9606&rs=NM_178826&members=miR-3607-3p&showcnc=1&shownc=1&showncf=1
hsa-miR-3607-3p	MIMAT0017985	hsa-miR-3607-3p	DSC2	desmocollin 2	-0.17	http://www.targetscan.org/cgi-bin/targetscan/vert_61/view_gene.cgi?taxid=9606&rs=NM_004949&members=miR-3607-3p&showcnc=1&shownc=1&showncf=1
hsa-miR-3607-3p	MIMAT0017985	hsa-miR-3607-3p	SPRED3	sprouty-related, EVH1 domain containing 3	-0.17	http://www.targetscan.org/cgi-bin/targetscan/vert_61/view_gene.cgi?taxid=9606&rs=NM_001039616&members=miR-3607-3p&showcnc=1&shownc=1&showncf=1
hsa-miR-3607-3p	MIMAT0017985	hsa-miR-3607-3p	C1orf21	chromosome 1 open reading frame 21	-0.16	http://www.targetscan.org/cgi-bin/targetscan/vert_61/view_gene.cgi?taxid=9606&rs=NM_030806&members=miR-3607-3p&showcnc=1&shownc=1&showncf=1
hsa-miR-3607-3p	MIMAT0017985	hsa-miR-3607-3p	ABAT	4-aminobutyrate aminotransferase	-0.16	http://www.targetscan.org/cgi-bin/targetscan/vert_61/view_gene.cgi?taxid=9606&rs=NM_000663&members=miR-3607-3p&showcnc=1&shownc=1&showncf=1
hsa-miR-3607-3p	MIMAT0017985	hsa-miR-3607-3p	GABRA1	gamma-aminobutyric acid (GABA) A receptor, alpha 1	-0.16	http://www.targetscan.org/cgi-bin/targetscan/vert_61/view_gene.cgi?taxid=9606&rs=NM_000806&members=miR-3607-3p&showcnc=1&shownc=1&showncf=1
hsa-miR-3607-3p	MIMAT0017985	hsa-miR-3607-3p	EIF4E	eukaryotic translation initiation factor 4E	-0.16	http://www.targetscan.org/cgi-bin/targetscan/vert_61/view_gene.cgi?taxid=9606&rs=NM_001130678&members=miR-3607-3p&showcnc=1&shownc=1&showncf=1
hsa-miR-3607-3p	MIMAT0017985	hsa-miR-3607-3p	FOXF2	forkhead box F2	-0.16	http://www.targetscan.org/cgi-bin/targetscan/vert_61/view_gene.cgi?taxid=9606&rs=NM_001452&members=miR-3607-3p&showcnc=1&shownc=1&showncf=1
hsa-miR-3607-3p	MIMAT0017985	hsa-miR-3607-3p	GABPB1	GA binding protein transcription factor, beta subunit 1	-0.16	http://www.targetscan.org/cgi-bin/targetscan/vert_61/view_gene.cgi?taxid=9606&rs=NM_005254&members=miR-3607-3p&showcnc=1&shownc=1&showncf=1
hsa-miR-3607-3p	MIMAT0017985	hsa-miR-3607-3p	TIMP3	TIMP metallopeptidase inhibitor 3	-0.16	http://www.targetscan.org/cgi-bin/targetscan/vert_61/view_gene.cgi?taxid=9606&rs=NM_000362&members=miR-3607-3p&showcnc=1&shownc=1&showncf=1
hsa-miR-3607-3p	MIMAT0017985	hsa-miR-3607-3p	ZBTB44	zinc finger and BTB domain containing 44	-0.16	http://www.targetscan.org/cgi-bin/targetscan/vert_61/view_gene.cgi?taxid=9606&rs=NM_014155&members=miR-3607-3p&showcnc=1&shownc=1&showncf=1
hsa-miR-3607-3p	MIMAT0017985	hsa-miR-3607-3p	NPAT	nuclear protein, ataxia-telangiectasia locus	-0.16	http://www.targetscan.org/cgi-bin/targetscan/vert_61/view_gene.cgi?taxid=9606&rs=NM_002519&members=miR-3607-3p&showcnc=1&shownc=1&showncf=1
hsa-miR-3607-3p	MIMAT0017985	hsa-miR-3607-3p	NAA15	N(alpha)-acetyltransferase 15, NatA auxiliary subunit	-0.16	http://www.targetscan.org/cgi-bin/targetscan/vert_61/view_gene.cgi?taxid=9606&rs=NM_057175&members=miR-3607-3p&showcnc=1&shownc=1&showncf=1
hsa-miR-3607-3p	MIMAT0017985	hsa-miR-3607-3p	C2orf68	chromosome 2 open reading frame 68	-0.16	http://www.targetscan.org/cgi-bin/targetscan/vert_61/view_gene.cgi?taxid=9606&rs=NM_001013649&members=miR-3607-3p&showcnc=1&shownc=1&showncf=1
hsa-miR-3607-3p	MIMAT0017985	hsa-miR-3607-3p	LIMCH1	LIM and calponin homology domains 1	-0.16	http://www.targetscan.org/cgi-bin/targetscan/vert_61/view_gene.cgi?taxid=9606&rs=NM_001112717&members=miR-3607-3p&showcnc=1&shownc=1&showncf=1
hsa-miR-3607-3p	MIMAT0017985	hsa-miR-3607-3p	RBM12	RNA binding motif protein 12	-0.16	http://www.targetscan.org/cgi-bin/targetscan/vert_61/view_gene.cgi?taxid=9606&rs=NM_001198838&members=miR-3607-3p&showcnc=1&shownc=1&showncf=1
hsa-miR-3607-3p	MIMAT0017985	hsa-miR-3607-3p	TRA2B	transformer 2 beta homolog (Drosophila)	-0.16	http://www.targetscan.org/cgi-bin/targetscan/vert_61/view_gene.cgi?taxid=9606&rs=NM_004593&members=miR-3607-3p&showcnc=1&shownc=1&showncf=1
hsa-miR-3607-3p	MIMAT0017985	hsa-miR-3607-3p	KIAA1239	KIAA1239	-0.16	http://www.targetscan.org/cgi-bin/targetscan/vert_61/view_gene.cgi?taxid=9606&rs=NM_001144990&members=miR-3607-3p&showcnc=1&shownc=1&showncf=1
hsa-miR-3607-3p	MIMAT0017985	hsa-miR-3607-3p	ZDHHC20	zinc finger, DHHC-type containing 20	-0.16	http://www.targetscan.org/cgi-bin/targetscan/vert_61/view_gene.cgi?taxid=9606&rs=NM_153251&members=miR-3607-3p&showcnc=1&shownc=1&showncf=1
hsa-miR-3607-3p	MIMAT0017985	hsa-miR-3607-3p	FAM19A5	family with sequence similarity 19 (chemokine (C-C motif)-like), member A5	-0.15	http://www.targetscan.org/cgi-bin/targetscan/vert_61/view_gene.cgi?taxid=9606&rs=NM_001082967&members=miR-3607-3p&showcnc=1&shownc=1&showncf=1
hsa-miR-3607-3p	MIMAT0017985	hsa-miR-3607-3p	WDR82	WD repeat domain 82	-0.15	http://www.targetscan.org/cgi-bin/targetscan/vert_61/view_gene.cgi?taxid=9606&rs=NM_025222&members=miR-3607-3p&showcnc=1&shownc=1&showncf=1
hsa-miR-3607-3p	MIMAT0017985	hsa-miR-3607-3p	PLS3	plastin 3	-0.15	http://www.targetscan.org/cgi-bin/targetscan/vert_61/view_gene.cgi?taxid=9606&rs=NM_001136025&members=miR-3607-3p&showcnc=1&shownc=1&showncf=1
hsa-miR-3607-3p	MIMAT0017985	hsa-miR-3607-3p	KIAA1267	KIAA1267	-0.15	http://www.targetscan.org/cgi-bin/targetscan/vert_61/view_gene.cgi?taxid=9606&rs=NM_001193465&members=miR-3607-3p&showcnc=1&shownc=1&showncf=1
hsa-miR-3607-3p	MIMAT0017985	hsa-miR-3607-3p	IPO7	importin 7	-0.15	http://www.targetscan.org/cgi-bin/targetscan/vert_61/view_gene.cgi?taxid=9606&rs=NM_006391&members=miR-3607-3p&showcnc=1&shownc=1&showncf=1
hsa-miR-3607-3p	MIMAT0017985	hsa-miR-3607-3p	ST8SIA4	ST8 alpha-N-acetyl-neuraminide alpha-2,8-sialyltransferase 4	-0.15	http://www.targetscan.org/cgi-bin/targetscan/vert_61/view_gene.cgi?taxid=9606&rs=NM_005668&members=miR-3607-3p&showcnc=1&shownc=1&showncf=1
hsa-miR-3607-3p	MIMAT0017985	hsa-miR-3607-3p	MRE11A	MRE11 meiotic recombination 11 homolog A (S. cerevisiae)	-0.15	http://www.targetscan.org/cgi-bin/targetscan/vert_61/view_gene.cgi?taxid=9606&rs=NM_005590&members=miR-3607-3p&showcnc=1&shownc=1&showncf=1
hsa-miR-3607-3p	MIMAT0017985	hsa-miR-3607-3p	ARHGEF3	Rho guanine nucleotide exchange factor (GEF) 3	-0.15	http://www.targetscan.org/cgi-bin/targetscan/vert_61/view_gene.cgi?taxid=9606&rs=NM_001128615&members=miR-3607-3p&showcnc=1&shownc=1&showncf=1
hsa-miR-3607-3p	MIMAT0017985	hsa-miR-3607-3p	UTP14C	UTP14, U3 small nucleolar ribonucleoprotein, homolog C (yeast)	-0.15	http://www.targetscan.org/cgi-bin/targetscan/vert_61/view_gene.cgi?taxid=9606&rs=NM_021645&members=miR-3607-3p&showcnc=1&shownc=1&showncf=1
hsa-miR-3607-3p	MIMAT0017985	hsa-miR-3607-3p	OSR1	odd-skipped related 1 (Drosophila)	-0.15	http://www.targetscan.org/cgi-bin/targetscan/vert_61/view_gene.cgi?taxid=9606&rs=NM_145260&members=miR-3607-3p&showcnc=1&shownc=1&showncf=1
hsa-miR-3607-3p	MIMAT0017985	hsa-miR-3607-3p	ZNF697	zinc finger protein 697	-0.15	http://www.targetscan.org/cgi-bin/targetscan/vert_61/view_gene.cgi?taxid=9606&rs=NM_001080470&members=miR-3607-3p&showcnc=1&shownc=1&showncf=1
hsa-miR-3607-3p	MIMAT0017985	hsa-miR-3607-3p	FAM5C	family with sequence similarity 5, member C	-0.15	http://www.targetscan.org/cgi-bin/targetscan/vert_61/view_gene.cgi?taxid=9606&rs=NM_199051&members=miR-3607-3p&showcnc=1&shownc=1&showncf=1
hsa-miR-3607-3p	MIMAT0017985	hsa-miR-3607-3p	USP15	ubiquitin specific peptidase 15	-0.15	http://www.targetscan.org/cgi-bin/targetscan/vert_61/view_gene.cgi?taxid=9606&rs=NM_006313&members=miR-3607-3p&showcnc=1&shownc=1&showncf=1
hsa-miR-3607-3p	MIMAT0017985	hsa-miR-3607-3p	SEC24A	SEC24 family, member A (S. cerevisiae)	-0.15	http://www.targetscan.org/cgi-bin/targetscan/vert_61/view_gene.cgi?taxid=9606&rs=NM_021982&members=miR-3607-3p&showcnc=1&shownc=1&showncf=1
hsa-miR-3607-3p	MIMAT0017985	hsa-miR-3607-3p	PEG3	paternally expressed 3	-0.15	http://www.targetscan.org/cgi-bin/targetscan/vert_61/view_gene.cgi?taxid=9606&rs=NM_001146184&members=miR-3607-3p&showcnc=1&shownc=1&showncf=1
hsa-miR-3607-3p	MIMAT0017985	hsa-miR-3607-3p	TTLL3	tubulin tyrosine ligase-like family, member 3	-0.15	http://www.targetscan.org/cgi-bin/targetscan/vert_61/view_gene.cgi?taxid=9606&rs=NM_001025930&members=miR-3607-3p&showcnc=1&shownc=1&showncf=1
hsa-miR-3607-3p	MIMAT0017985	hsa-miR-3607-3p	HUNK	hormonally up-regulated Neu-associated kinase	-0.15	http://www.targetscan.org/cgi-bin/targetscan/vert_61/view_gene.cgi?taxid=9606&rs=NM_014586&members=miR-3607-3p&showcnc=1&shownc=1&showncf=1
hsa-miR-3607-3p	MIMAT0017985	hsa-miR-3607-3p	YWHAG	tyrosine 3-monooxygenase/tryptophan 5-monooxygenase activation protein, gamma polypeptide	-0.15	http://www.targetscan.org/cgi-bin/targetscan/vert_61/view_gene.cgi?taxid=9606&rs=NM_012479&members=miR-3607-3p&showcnc=1&shownc=1&showncf=1
hsa-miR-3607-3p	MIMAT0017985	hsa-miR-3607-3p	HSPB8	heat shock 22kDa protein 8	-0.15	http://www.targetscan.org/cgi-bin/targetscan/vert_61/view_gene.cgi?taxid=9606&rs=NM_014365&members=miR-3607-3p&showcnc=1&shownc=1&showncf=1
hsa-miR-3607-3p	MIMAT0017985	hsa-miR-3607-3p	ABCC5	ATP-binding cassette, sub-family C (CFTR/MRP), member 5	-0.15	http://www.targetscan.org/cgi-bin/targetscan/vert_61/view_gene.cgi?taxid=9606&rs=NM_005688&members=miR-3607-3p&showcnc=1&shownc=1&showncf=1
hsa-miR-3607-3p	MIMAT0017985	hsa-miR-3607-3p	AKAP5	A kinase (PRKA) anchor protein 5	-0.15	http://www.targetscan.org/cgi-bin/targetscan/vert_61/view_gene.cgi?taxid=9606&rs=NM_004857&members=miR-3607-3p&showcnc=1&shownc=1&showncf=1
hsa-miR-3607-3p	MIMAT0017985	hsa-miR-3607-3p	ROD1	ROD1 regulator of differentiation 1 (S. pombe)	-0.14	http://www.targetscan.org/cgi-bin/targetscan/vert_61/view_gene.cgi?taxid=9606&rs=NM_001163788&members=miR-3607-3p&showcnc=1&shownc=1&showncf=1
hsa-miR-3607-3p	MIMAT0017985	hsa-miR-3607-3p	PLXNC1	plexin C1	-0.14	http://www.targetscan.org/cgi-bin/targetscan/vert_61/view_gene.cgi?taxid=9606&rs=NM_005761&members=miR-3607-3p&showcnc=1&shownc=1&showncf=1
hsa-miR-3607-3p	MIMAT0017985	hsa-miR-3607-3p	TMEM184A	transmembrane protein 184A	-0.14	http://www.targetscan.org/cgi-bin/targetscan/vert_61/view_gene.cgi?taxid=9606&rs=NM_001097620&members=miR-3607-3p&showcnc=1&shownc=1&showncf=1
hsa-miR-3607-3p	MIMAT0017985	hsa-miR-3607-3p	COL4A3	collagen, type IV, alpha 3 (Goodpasture antigen)	-0.13	http://www.targetscan.org/cgi-bin/targetscan/vert_61/view_gene.cgi?taxid=9606&rs=NM_000091&members=miR-3607-3p&showcnc=1&shownc=1&showncf=1
hsa-miR-3607-3p	MIMAT0017985	hsa-miR-3607-3p	TMEM41A	transmembrane protein 41A	-0.13	http://www.targetscan.org/cgi-bin/targetscan/vert_61/view_gene.cgi?taxid=9606&rs=NM_080652&members=miR-3607-3p&showcnc=1&shownc=1&showncf=1
hsa-miR-3607-3p	MIMAT0017985	hsa-miR-3607-3p	MARCH6	membrane-associated ring finger (C3HC4) 6	-0.13	http://www.targetscan.org/cgi-bin/targetscan/vert_61/view_gene.cgi?taxid=9606&rs=NM_005885&members=miR-3607-3p&showcnc=1&shownc=1&showncf=1
hsa-miR-3607-3p	MIMAT0017985	hsa-miR-3607-3p	C12orf11	chromosome 12 open reading frame 11	-0.13	http://www.targetscan.org/cgi-bin/targetscan/vert_61/view_gene.cgi?taxid=9606&rs=NM_018164&members=miR-3607-3p&showcnc=1&shownc=1&showncf=1
hsa-miR-3607-3p	MIMAT0017985	hsa-miR-3607-3p	PPP1R12A	protein phosphatase 1, regulatory (inhibitor) subunit 12A	-0.13	http://www.targetscan.org/cgi-bin/targetscan/vert_61/view_gene.cgi?taxid=9606&rs=NM_001143885&members=miR-3607-3p&showcnc=1&shownc=1&showncf=1
hsa-miR-3607-3p	MIMAT0017985	hsa-miR-3607-3p	PDE7A	phosphodiesterase 7A	-0.13	http://www.targetscan.org/cgi-bin/targetscan/vert_61/view_gene.cgi?taxid=9606&rs=NM_001242318&members=miR-3607-3p&showcnc=1&shownc=1&showncf=1
hsa-miR-3607-3p	MIMAT0017985	hsa-miR-3607-3p	NOD2	nucleotide-binding oligomerization domain containing 2	-0.13	http://www.targetscan.org/cgi-bin/targetscan/vert_61/view_gene.cgi?taxid=9606&rs=NM_022162&members=miR-3607-3p&showcnc=1&shownc=1&showncf=1
hsa-miR-3607-3p	MIMAT0017985	hsa-miR-3607-3p	RASAL2	RAS protein activator like 2	-0.13	http://www.targetscan.org/cgi-bin/targetscan/vert_61/view_gene.cgi?taxid=9606&rs=NM_004841&members=miR-3607-3p&showcnc=1&shownc=1&showncf=1
hsa-miR-3607-3p	MIMAT0017985	hsa-miR-3607-3p	PIK3R1	phosphoinositide-3-kinase, regulatory subunit 1 (alpha)	-0.13	http://www.targetscan.org/cgi-bin/targetscan/vert_61/view_gene.cgi?taxid=9606&rs=NM_001242466&members=miR-3607-3p&showcnc=1&shownc=1&showncf=1
hsa-miR-3607-3p	MIMAT0017985	hsa-miR-3607-3p	PLAG1	pleiomorphic adenoma gene 1	-0.13	http://www.targetscan.org/cgi-bin/targetscan/vert_61/view_gene.cgi?taxid=9606&rs=NM_001114634&members=miR-3607-3p&showcnc=1&shownc=1&showncf=1
hsa-miR-3607-3p	MIMAT0017985	hsa-miR-3607-3p	ZFP36L1	zinc finger protein 36, C3H type-like 1	-0.13	http://www.targetscan.org/cgi-bin/targetscan/vert_61/view_gene.cgi?taxid=9606&rs=NM_004926&members=miR-3607-3p&showcnc=1&shownc=1&showncf=1
hsa-miR-3607-3p	MIMAT0017985	hsa-miR-3607-3p	LATS1	LATS, large tumor suppressor, homolog 1 (Drosophila)	-0.13	http://www.targetscan.org/cgi-bin/targetscan/vert_61/view_gene.cgi?taxid=9606&rs=NM_004690&members=miR-3607-3p&showcnc=1&shownc=1&showncf=1
hsa-miR-3607-3p	MIMAT0017985	hsa-miR-3607-3p	ZMYND8	zinc finger, MYND-type containing 8	-0.13	http://www.targetscan.org/cgi-bin/targetscan/vert_61/view_gene.cgi?taxid=9606&rs=NM_012408&members=miR-3607-3p&showcnc=1&shownc=1&showncf=1
hsa-miR-3607-3p	MIMAT0017985	hsa-miR-3607-3p	MDGA2	MAM domain containing glycosylphosphatidylinositol anchor 2	-0.13	http://www.targetscan.org/cgi-bin/targetscan/vert_61/view_gene.cgi?taxid=9606&rs=NM_001113498&members=miR-3607-3p&showcnc=1&shownc=1&showncf=1
hsa-miR-3607-3p	MIMAT0017985	hsa-miR-3607-3p	ZPBP2	zona pellucida binding protein 2	-0.13	http://www.targetscan.org/cgi-bin/targetscan/vert_61/view_gene.cgi?taxid=9606&rs=NM_198844&members=miR-3607-3p&showcnc=1&shownc=1&showncf=1
hsa-miR-3607-3p	MIMAT0017985	hsa-miR-3607-3p	FLJ36031	hypothetical protein FLJ36031	-0.13	http://www.targetscan.org/cgi-bin/targetscan/vert_61/view_gene.cgi?taxid=9606&rs=NM_175884&members=miR-3607-3p&showcnc=1&shownc=1&showncf=1
hsa-miR-3607-3p	MIMAT0017985	hsa-miR-3607-3p	WFS1	Wolfram syndrome 1 (wolframin)	-0.13	http://www.targetscan.org/cgi-bin/targetscan/vert_61/view_gene.cgi?taxid=9606&rs=NM_001145853&members=miR-3607-3p&showcnc=1&shownc=1&showncf=1
hsa-miR-3607-3p	MIMAT0017985	hsa-miR-3607-3p	PPFIA2	protein tyrosine phosphatase, receptor type, f polypeptide (PTPRF), interacting protein (liprin), alpha 2	-0.13	http://www.targetscan.org/cgi-bin/targetscan/vert_61/view_gene.cgi?taxid=9606&rs=NM_001220473&members=miR-3607-3p&showcnc=1&shownc=1&showncf=1
hsa-miR-3607-3p	MIMAT0017985	hsa-miR-3607-3p	ITGB3	integrin, beta 3 (platelet glycoprotein IIIa, antigen CD61)	-0.13	http://www.targetscan.org/cgi-bin/targetscan/vert_61/view_gene.cgi?taxid=9606&rs=NM_000212&members=miR-3607-3p&showcnc=1&shownc=1&showncf=1
hsa-miR-3607-3p	MIMAT0017985	hsa-miR-3607-3p	MAST3	microtubule associated serine/threonine kinase 3	-0.13	http://www.targetscan.org/cgi-bin/targetscan/vert_61/view_gene.cgi?taxid=9606&rs=NM_015016&members=miR-3607-3p&showcnc=1&shownc=1&showncf=1
hsa-miR-3607-3p	MIMAT0017985	hsa-miR-3607-3p	ARID4A	AT rich interactive domain 4A (RBP1-like)	-0.12	http://www.targetscan.org/cgi-bin/targetscan/vert_61/view_gene.cgi?taxid=9606&rs=NM_002892&members=miR-3607-3p&showcnc=1&shownc=1&showncf=1
hsa-miR-3607-3p	MIMAT0017985	hsa-miR-3607-3p	PCGF3	polycomb group ring finger 3	-0.12	http://www.targetscan.org/cgi-bin/targetscan/vert_61/view_gene.cgi?taxid=9606&rs=NM_006315&members=miR-3607-3p&showcnc=1&shownc=1&showncf=1
hsa-miR-3607-3p	MIMAT0017985	hsa-miR-3607-3p	VAMP3	vesicle-associated membrane protein 3 (cellubrevin)	-0.12	http://www.targetscan.org/cgi-bin/targetscan/vert_61/view_gene.cgi?taxid=9606&rs=NM_004781&members=miR-3607-3p&showcnc=1&shownc=1&showncf=1
hsa-miR-3607-3p	MIMAT0017985	hsa-miR-3607-3p	SS18	synovial sarcoma translocation, chromosome 18	-0.12	http://www.targetscan.org/cgi-bin/targetscan/vert_61/view_gene.cgi?taxid=9606&rs=NM_001007559&members=miR-3607-3p&showcnc=1&shownc=1&showncf=1
hsa-miR-3607-3p	MIMAT0017985	hsa-miR-3607-3p	ZNF200	zinc finger protein 200	-0.12	http://www.targetscan.org/cgi-bin/targetscan/vert_61/view_gene.cgi?taxid=9606&rs=NM_001145446&members=miR-3607-3p&showcnc=1&shownc=1&showncf=1
hsa-miR-3607-3p	MIMAT0017985	hsa-miR-3607-3p	HEXIM1	hexamethylene bis-acetamide inducible 1	-0.12	http://www.targetscan.org/cgi-bin/targetscan/vert_61/view_gene.cgi?taxid=9606&rs=NM_006460&members=miR-3607-3p&showcnc=1&shownc=1&showncf=1
hsa-miR-3607-3p	MIMAT0017985	hsa-miR-3607-3p	LGSN	lengsin, lens protein with glutamine synthetase domain	-0.12	http://www.targetscan.org/cgi-bin/targetscan/vert_61/view_gene.cgi?taxid=9606&rs=NM_001143940&members=miR-3607-3p&showcnc=1&shownc=1&showncf=1
hsa-miR-3607-3p	MIMAT0017985	hsa-miR-3607-3p	TMEM121	transmembrane protein 121	-0.12	http://www.targetscan.org/cgi-bin/targetscan/vert_61/view_gene.cgi?taxid=9606&rs=NM_025268&members=miR-3607-3p&showcnc=1&shownc=1&showncf=1
hsa-miR-3607-3p	MIMAT0017985	hsa-miR-3607-3p	GRIA2	glutamate receptor, ionotropic, AMPA 2	-0.12	http://www.targetscan.org/cgi-bin/targetscan/vert_61/view_gene.cgi?taxid=9606&rs=NM_000826&members=miR-3607-3p&showcnc=1&shownc=1&showncf=1
hsa-miR-3607-3p	MIMAT0017985	hsa-miR-3607-3p	CELSR3	cadherin, EGF LAG seven-pass G-type receptor 3 (flamingo homolog, Drosophila)	-0.12	http://www.targetscan.org/cgi-bin/targetscan/vert_61/view_gene.cgi?taxid=9606&rs=NM_001407&members=miR-3607-3p&showcnc=1&shownc=1&showncf=1
hsa-miR-3607-3p	MIMAT0017985	hsa-miR-3607-3p	NAA25	N(alpha)-acetyltransferase 25, NatB auxiliary subunit	-0.12	http://www.targetscan.org/cgi-bin/targetscan/vert_61/view_gene.cgi?taxid=9606&rs=NM_024953&members=miR-3607-3p&showcnc=1&shownc=1&showncf=1
hsa-miR-3607-3p	MIMAT0017985	hsa-miR-3607-3p	FAM118B	family with sequence similarity 118, member B	-0.12	http://www.targetscan.org/cgi-bin/targetscan/vert_61/view_gene.cgi?taxid=9606&rs=NM_024556&members=miR-3607-3p&showcnc=1&shownc=1&showncf=1
hsa-miR-3607-3p	MIMAT0017985	hsa-miR-3607-3p	SLC30A7	solute carrier family 30 (zinc transporter), member 7	>-0.12	http://www.targetscan.org/cgi-bin/targetscan/vert_61/view_gene.cgi?taxid=9606&rs=NM_001144884&members=miR-3607-3p&showcnc=1&shownc=1&showncf=1
hsa-miR-3607-3p	MIMAT0017985	hsa-miR-3607-3p	ERRFI1	ERBB receptor feedback inhibitor 1	-0.12	http://www.targetscan.org/cgi-bin/targetscan/vert_61/view_gene.cgi?taxid=9606&rs=NM_018948&members=miR-3607-3p&showcnc=1&shownc=1&showncf=1
hsa-miR-3607-3p	MIMAT0017985	hsa-miR-3607-3p	PRRC2C	proline-rich coiled-coil 2C	-0.12	http://www.targetscan.org/cgi-bin/targetscan/vert_61/view_gene.cgi?taxid=9606&rs=NM_015172&members=miR-3607-3p&showcnc=1&shownc=1&showncf=1
hsa-miR-3607-3p	MIMAT0017985	hsa-miR-3607-3p	NRG2	neuregulin 2	-0.12	http://www.targetscan.org/cgi-bin/targetscan/vert_61/view_gene.cgi?taxid=9606&rs=NM_001184935&members=miR-3607-3p&showcnc=1&shownc=1&showncf=1
hsa-miR-3607-3p	MIMAT0017985	hsa-miR-3607-3p	UNC5D	unc-5 homolog D (C. elegans)	-0.12	http://www.targetscan.org/cgi-bin/targetscan/vert_61/view_gene.cgi?taxid=9606&rs=NM_080872&members=miR-3607-3p&showcnc=1&shownc=1&showncf=1
hsa-miR-3607-3p	MIMAT0017985	hsa-miR-3607-3p	MAP2K4	mitogen-activated protein kinase kinase 4	-0.12	http://www.targetscan.org/cgi-bin/targetscan/vert_61/view_gene.cgi?taxid=9606&rs=NM_003010&members=miR-3607-3p&showcnc=1&shownc=1&showncf=1
hsa-miR-3607-3p	MIMAT0017985	hsa-miR-3607-3p	GRM3	glutamate receptor, metabotropic 3	-0.12	http://www.targetscan.org/cgi-bin/targetscan/vert_61/view_gene.cgi?taxid=9606&rs=NM_000840&members=miR-3607-3p&showcnc=1&shownc=1&showncf=1
hsa-miR-3607-3p	MIMAT0017985	hsa-miR-3607-3p	INTS6	integrator complex subunit 6	-0.12	http://www.targetscan.org/cgi-bin/targetscan/vert_61/view_gene.cgi?taxid=9606&rs=NM_001039937&members=miR-3607-3p&showcnc=1&shownc=1&showncf=1
hsa-miR-3607-3p	MIMAT0017985	hsa-miR-3607-3p	SETD1B	SET domain containing 1B	-0.12	http://www.targetscan.org/cgi-bin/targetscan/vert_61/view_gene.cgi?taxid=9606&rs=NM_015048&members=miR-3607-3p&showcnc=1&shownc=1&showncf=1
hsa-miR-3607-3p	MIMAT0017985	hsa-miR-3607-3p	PSMD9	proteasome (prosome, macropain) 26S subunit, non-ATPase, 9	-0.12	http://www.targetscan.org/cgi-bin/targetscan/vert_61/view_gene.cgi?taxid=9606&rs=NM_002813&members=miR-3607-3p&showcnc=1&shownc=1&showncf=1
hsa-miR-3607-3p	MIMAT0017985	hsa-miR-3607-3p	RNF170	ring finger protein 170	-0.12	http://www.targetscan.org/cgi-bin/targetscan/vert_61/view_gene.cgi?taxid=9606&rs=NM_001160223&members=miR-3607-3p&showcnc=1&shownc=1&showncf=1
hsa-miR-3607-3p	MIMAT0017985	hsa-miR-3607-3p	FOXA1	forkhead box A1	-0.12	http://www.targetscan.org/cgi-bin/targetscan/vert_61/view_gene.cgi?taxid=9606&rs=NM_004496&members=miR-3607-3p&showcnc=1&shownc=1&showncf=1
hsa-miR-3607-3p	MIMAT0017985	hsa-miR-3607-3p	NR3C1	nuclear receptor subfamily 3, group C, member 1 (glucocorticoid receptor)	-0.12	http://www.targetscan.org/cgi-bin/targetscan/vert_61/view_gene.cgi?taxid=9606&rs=NM_000176&members=miR-3607-3p&showcnc=1&shownc=1&showncf=1
hsa-miR-3607-3p	MIMAT0017985	hsa-miR-3607-3p	GOSR2	golgi SNAP receptor complex member 2	-0.12	http://www.targetscan.org/cgi-bin/targetscan/vert_61/view_gene.cgi?taxid=9606&rs=NM_001012511&members=miR-3607-3p&showcnc=1&shownc=1&showncf=1
hsa-miR-3607-3p	MIMAT0017985	hsa-miR-3607-3p	XPNPEP2	X-prolyl aminopeptidase (aminopeptidase P) 2, membrane-bound	-0.12	http://www.targetscan.org/cgi-bin/targetscan/vert_61/view_gene.cgi?taxid=9606&rs=NM_003399&members=miR-3607-3p&showcnc=1&shownc=1&showncf=1
hsa-miR-3607-3p	MIMAT0017985	hsa-miR-3607-3p	NKTR	natural killer-tumor recognition sequence	-0.12	http://www.targetscan.org/cgi-bin/targetscan/vert_61/view_gene.cgi?taxid=9606&rs=NM_005385&members=miR-3607-3p&showcnc=1&shownc=1&showncf=1
hsa-miR-3607-3p	MIMAT0017985	hsa-miR-3607-3p	PDE3A	phosphodiesterase 3A, cGMP-inhibited	-0.12	http://www.targetscan.org/cgi-bin/targetscan/vert_61/view_gene.cgi?taxid=9606&rs=NM_000921&members=miR-3607-3p&showcnc=1&shownc=1&showncf=1
hsa-miR-3607-3p	MIMAT0017985	hsa-miR-3607-3p	ZBTB7B	zinc finger and BTB domain containing 7B	-0.12	http://www.targetscan.org/cgi-bin/targetscan/vert_61/view_gene.cgi?taxid=9606&rs=NM_015872&members=miR-3607-3p&showcnc=1&shownc=1&showncf=1
hsa-miR-3607-3p	MIMAT0017985	hsa-miR-3607-3p	KIAA1217	KIAA1217	-0.11	http://www.targetscan.org/cgi-bin/targetscan/vert_61/view_gene.cgi?taxid=9606&rs=NM_001098500&members=miR-3607-3p&showcnc=1&shownc=1&showncf=1
hsa-miR-3607-3p	MIMAT0017985	hsa-miR-3607-3p	IQCJ	IQ motif containing J	-0.11	http://www.targetscan.org/cgi-bin/targetscan/vert_61/view_gene.cgi?taxid=9606&rs=NM_001042705&members=miR-3607-3p&showcnc=1&shownc=1&showncf=1
hsa-miR-3607-3p	MIMAT0017985	hsa-miR-3607-3p	TIAM1	T-cell lymphoma invasion and metastasis 1	-0.11	http://www.targetscan.org/cgi-bin/targetscan/vert_61/view_gene.cgi?taxid=9606&rs=NM_003253&members=miR-3607-3p&showcnc=1&shownc=1&showncf=1
hsa-miR-3607-3p	MIMAT0017985	hsa-miR-3607-3p	BSN	bassoon (presynaptic cytomatrix protein)	-0.11	http://www.targetscan.org/cgi-bin/targetscan/vert_61/view_gene.cgi?taxid=9606&rs=NM_003458&members=miR-3607-3p&showcnc=1&shownc=1&showncf=1
hsa-miR-3607-3p	MIMAT0017985	hsa-miR-3607-3p	RRN3	RRN3 RNA polymerase I transcription factor homolog (S. cerevisiae)	-0.11	http://www.targetscan.org/cgi-bin/targetscan/vert_61/view_gene.cgi?taxid=9606&rs=NM_018427&members=miR-3607-3p&showcnc=1&shownc=1&showncf=1
hsa-miR-3607-3p	MIMAT0017985	hsa-miR-3607-3p	SOAT1	sterol O-acyltransferase 1	-0.11	http://www.targetscan.org/cgi-bin/targetscan/vert_61/view_gene.cgi?taxid=9606&rs=NM_003101&members=miR-3607-3p&showcnc=1&shownc=1&showncf=1
hsa-miR-3607-3p	MIMAT0017985	hsa-miR-3607-3p	SCNM1	sodium channel modifier 1	-0.11	http://www.targetscan.org/cgi-bin/targetscan/vert_61/view_gene.cgi?taxid=9606&rs=NM_001204856&members=miR-3607-3p&showcnc=1&shownc=1&showncf=1
hsa-miR-3607-3p	MIMAT0017985	hsa-miR-3607-3p	TNFAIP8L2-SCNM1	TNFAIP8L2-SCNM1 readthrough	-0.11	http://www.targetscan.org/cgi-bin/targetscan/vert_61/view_gene.cgi?taxid=9606&rs=NM_001204848&members=miR-3607-3p&showcnc=1&shownc=1&showncf=1
hsa-miR-3607-3p	MIMAT0017985	hsa-miR-3607-3p	FUT9	fucosyltransferase 9 (alpha (1,3) fucosyltransferase)	-0.11	http://www.targetscan.org/cgi-bin/targetscan/vert_61/view_gene.cgi?taxid=9606&rs=NM_006581&members=miR-3607-3p&showcnc=1&shownc=1&showncf=1
hsa-miR-3607-3p	MIMAT0017985	hsa-miR-3607-3p	TRAPPC8	trafficking protein particle complex 8	-0.11	http://www.targetscan.org/cgi-bin/targetscan/vert_61/view_gene.cgi?taxid=9606&rs=NM_014939&members=miR-3607-3p&showcnc=1&shownc=1&showncf=1
hsa-miR-3607-3p	MIMAT0017985	hsa-miR-3607-3p	SLIT1	slit homolog 1 (Drosophila)	-0.11	http://www.targetscan.org/cgi-bin/targetscan/vert_61/view_gene.cgi?taxid=9606&rs=NM_003061&members=miR-3607-3p&showcnc=1&shownc=1&showncf=1
hsa-miR-3607-3p	MIMAT0017985	hsa-miR-3607-3p	ALS2CR8	amyotrophic lateral sclerosis 2 (juvenile) chromosome region, candidate 8	-0.11	http://www.targetscan.org/cgi-bin/targetscan/vert_61/view_gene.cgi?taxid=9606&rs=NM_001104586&members=miR-3607-3p&showcnc=1&shownc=1&showncf=1
hsa-miR-3607-3p	MIMAT0017985	hsa-miR-3607-3p	ST13	suppression of tumorigenicity 13 (colon carcinoma) (Hsp70 interacting protein)	-0.11	http://www.targetscan.org/cgi-bin/targetscan/vert_61/view_gene.cgi?taxid=9606&rs=NM_003932&members=miR-3607-3p&showcnc=1&shownc=1&showncf=1
hsa-miR-3607-3p	MIMAT0017985	hsa-miR-3607-3p	DLG2	discs, large homolog 2 (Drosophila)	-0.11	http://www.targetscan.org/cgi-bin/targetscan/vert_61/view_gene.cgi?taxid=9606&rs=NM_001142699&members=miR-3607-3p&showcnc=1&shownc=1&showncf=1
hsa-miR-3607-3p	MIMAT0017985	hsa-miR-3607-3p	NFATC3	nuclear factor of activated T-cells, cytoplasmic, calcineurin-dependent 3	-0.11	http://www.targetscan.org/cgi-bin/targetscan/vert_61/view_gene.cgi?taxid=9606&rs=NM_004555&members=miR-3607-3p&showcnc=1&shownc=1&showncf=1
hsa-miR-3607-3p	MIMAT0017985	hsa-miR-3607-3p	ATAD2B	ATPase family, AAA domain containing 2B	-0.11	http://www.targetscan.org/cgi-bin/targetscan/vert_61/view_gene.cgi?taxid=9606&rs=NM_001242338&members=miR-3607-3p&showcnc=1&shownc=1&showncf=1
hsa-miR-3607-3p	MIMAT0017985	hsa-miR-3607-3p	ONECUT2	one cut homeobox 2	>-0.11	http://www.targetscan.org/cgi-bin/targetscan/vert_61/view_gene.cgi?taxid=9606&rs=NM_004852&members=miR-3607-3p&showcnc=1&shownc=1&showncf=1
hsa-miR-3607-3p	MIMAT0017985	hsa-miR-3607-3p	CTPS	CTP synthase	-0.11	http://www.targetscan.org/cgi-bin/targetscan/vert_61/view_gene.cgi?taxid=9606&rs=NM_001905&members=miR-3607-3p&showcnc=1&shownc=1&showncf=1
hsa-miR-3607-3p	MIMAT0017985	hsa-miR-3607-3p	SCN9A	sodium channel, voltage-gated, type IX, alpha subunit	-0.11	http://www.targetscan.org/cgi-bin/targetscan/vert_61/view_gene.cgi?taxid=9606&rs=NM_002977&members=miR-3607-3p&showcnc=1&shownc=1&showncf=1
hsa-miR-3607-3p	MIMAT0017985	hsa-miR-3607-3p	PPPDE1	PPPDE peptidase domain containing 1	-0.11	http://www.targetscan.org/cgi-bin/targetscan/vert_61/view_gene.cgi?taxid=9606&rs=NM_016076&members=miR-3607-3p&showcnc=1&shownc=1&showncf=1
hsa-miR-3607-3p	MIMAT0017985	hsa-miR-3607-3p	NPNT	nephronectin	-0.11	http://www.targetscan.org/cgi-bin/targetscan/vert_61/view_gene.cgi?taxid=9606&rs=NM_001033047&members=miR-3607-3p&showcnc=1&shownc=1&showncf=1
hsa-miR-3607-3p	MIMAT0017985	hsa-miR-3607-3p	SRGAP1	SLIT-ROBO Rho GTPase activating protein 1	-0.11	http://www.targetscan.org/cgi-bin/targetscan/vert_61/view_gene.cgi?taxid=9606&rs=NM_020762&members=miR-3607-3p&showcnc=1&shownc=1&showncf=1
hsa-miR-3607-3p	MIMAT0017985	hsa-miR-3607-3p	CACNA2D2	calcium channel, voltage-dependent, alpha 2/delta subunit 2	-0.11	http://www.targetscan.org/cgi-bin/targetscan/vert_61/view_gene.cgi?taxid=9606&rs=NM_001005505&members=miR-3607-3p&showcnc=1&shownc=1&showncf=1
hsa-miR-3607-3p	MIMAT0017985	hsa-miR-3607-3p	BASP1	brain abundant, membrane attached signal protein 1	-0.11	http://www.targetscan.org/cgi-bin/targetscan/vert_61/view_gene.cgi?taxid=9606&rs=NM_006317&members=miR-3607-3p&showcnc=1&shownc=1&showncf=1
hsa-miR-3607-3p	MIMAT0017985	hsa-miR-3607-3p	PIM2	pim-2 oncogene	-0.11	http://www.targetscan.org/cgi-bin/targetscan/vert_61/view_gene.cgi?taxid=9606&rs=NM_006875&members=miR-3607-3p&showcnc=1&shownc=1&showncf=1
hsa-miR-3607-3p	MIMAT0017985	hsa-miR-3607-3p	OLA1	Obg-like ATPase 1	-0.11	http://www.targetscan.org/cgi-bin/targetscan/vert_61/view_gene.cgi?taxid=9606&rs=NM_001011708&members=miR-3607-3p&showcnc=1&shownc=1&showncf=1
hsa-miR-3607-3p	MIMAT0017985	hsa-miR-3607-3p	IDH1	isocitrate dehydrogenase 1 (NADP+), soluble	-0.1	http://www.targetscan.org/cgi-bin/targetscan/vert_61/view_gene.cgi?taxid=9606&rs=NM_005896&members=miR-3607-3p&showcnc=1&shownc=1&showncf=1
hsa-miR-3607-3p	MIMAT0017985	hsa-miR-3607-3p	PPFIA1	protein tyrosine phosphatase, receptor type, f polypeptide (PTPRF), interacting protein (liprin), alpha 1	-0.1	http://www.targetscan.org/cgi-bin/targetscan/vert_61/view_gene.cgi?taxid=9606&rs=NM_003626&members=miR-3607-3p&showcnc=1&shownc=1&showncf=1
hsa-miR-3607-3p	MIMAT0017985	hsa-miR-3607-3p	SLC25A26	solute carrier family 25, member 26	-0.1	http://www.targetscan.org/cgi-bin/targetscan/vert_61/view_gene.cgi?taxid=9606&rs=NM_001164796&members=miR-3607-3p&showcnc=1&shownc=1&showncf=1
hsa-miR-3607-3p	MIMAT0017985	hsa-miR-3607-3p	FGF9	fibroblast growth factor 9 (glia-activating factor)	-0.1	http://www.targetscan.org/cgi-bin/targetscan/vert_61/view_gene.cgi?taxid=9606&rs=NM_002010&members=miR-3607-3p&showcnc=1&shownc=1&showncf=1
hsa-miR-3607-3p	MIMAT0017985	hsa-miR-3607-3p	CUL3	cullin 3	-0.1	http://www.targetscan.org/cgi-bin/targetscan/vert_61/view_gene.cgi?taxid=9606&rs=NM_003590&members=miR-3607-3p&showcnc=1&shownc=1&showncf=1
hsa-miR-3607-3p	MIMAT0017985	hsa-miR-3607-3p	NETO1	neuropilin (NRP) and tolloid (TLL)-like 1	-0.1	http://www.targetscan.org/cgi-bin/targetscan/vert_61/view_gene.cgi?taxid=9606&rs=NM_138966&members=miR-3607-3p&showcnc=1&shownc=1&showncf=1
hsa-miR-3607-3p	MIMAT0017985	hsa-miR-3607-3p	DGKG	diacylglycerol kinase, gamma 90kDa	-0.1	http://www.targetscan.org/cgi-bin/targetscan/vert_61/view_gene.cgi?taxid=9606&rs=NM_001080744&members=miR-3607-3p&showcnc=1&shownc=1&showncf=1
hsa-miR-3607-3p	MIMAT0017985	hsa-miR-3607-3p	ERO1L	ERO1-like (S. cerevisiae)	-0.1	http://www.targetscan.org/cgi-bin/targetscan/vert_61/view_gene.cgi?taxid=9606&rs=NM_014584&members=miR-3607-3p&showcnc=1&shownc=1&showncf=1
hsa-miR-3607-3p	MIMAT0017985	hsa-miR-3607-3p	PPP2R5E	protein phosphatase 2, regulatory subunit B', epsilon isoform	-0.1	http://www.targetscan.org/cgi-bin/targetscan/vert_61/view_gene.cgi?taxid=9606&rs=NM_006246&members=miR-3607-3p&showcnc=1&shownc=1&showncf=1
hsa-miR-3607-3p	MIMAT0017985	hsa-miR-3607-3p	SCN3A	sodium channel, voltage-gated, type III, alpha subunit	-0.1	http://www.targetscan.org/cgi-bin/targetscan/vert_61/view_gene.cgi?taxid=9606&rs=NM_001081676&members=miR-3607-3p&showcnc=1&shownc=1&showncf=1
hsa-miR-3607-3p	MIMAT0017985	hsa-miR-3607-3p	ASAP1	ArfGAP with SH3 domain, ankyrin repeat and PH domain 1	-0.1	http://www.targetscan.org/cgi-bin/targetscan/vert_61/view_gene.cgi?taxid=9606&rs=NM_018482&members=miR-3607-3p&showcnc=1&shownc=1&showncf=1
hsa-miR-3607-3p	MIMAT0017985	hsa-miR-3607-3p	LRRC32	leucine rich repeat containing 32	-0.1	http://www.targetscan.org/cgi-bin/targetscan/vert_61/view_gene.cgi?taxid=9606&rs=NM_001128922&members=miR-3607-3p&showcnc=1&shownc=1&showncf=1
hsa-miR-3607-3p	MIMAT0017985	hsa-miR-3607-3p	HOMER1	homer homolog 1 (Drosophila)	-0.1	http://www.targetscan.org/cgi-bin/targetscan/vert_61/view_gene.cgi?taxid=9606&rs=NM_004272&members=miR-3607-3p&showcnc=1&shownc=1&showncf=1
hsa-miR-3607-3p	MIMAT0017985	hsa-miR-3607-3p	CALML4	calmodulin-like 4	-0.1	http://www.targetscan.org/cgi-bin/targetscan/vert_61/view_gene.cgi?taxid=9606&rs=NM_001031733&members=miR-3607-3p&showcnc=1&shownc=1&showncf=1
hsa-miR-3607-3p	MIMAT0017985	hsa-miR-3607-3p	PCNX	pecanex homolog (Drosophila)	-0.1	http://www.targetscan.org/cgi-bin/targetscan/vert_61/view_gene.cgi?taxid=9606&rs=NM_014982&members=miR-3607-3p&showcnc=1&shownc=1&showncf=1
hsa-miR-3607-3p	MIMAT0017985	hsa-miR-3607-3p	B3GNT5	UDP-GlcNAc:betaGal beta-1,3-N-acetylglucosaminyltransferase 5	-0.1	http://www.targetscan.org/cgi-bin/targetscan/vert_61/view_gene.cgi?taxid=9606&rs=NM_032047&members=miR-3607-3p&showcnc=1&shownc=1&showncf=1
hsa-miR-3607-3p	MIMAT0017985	hsa-miR-3607-3p	NOVA1	neuro-oncological ventral antigen 1	-0.1	http://www.targetscan.org/cgi-bin/targetscan/vert_61/view_gene.cgi?taxid=9606&rs=NM_002515&members=miR-3607-3p&showcnc=1&shownc=1&showncf=1
hsa-miR-3607-3p	MIMAT0017985	hsa-miR-3607-3p	ANKRD50	ankyrin repeat domain 50	-0.1	http://www.targetscan.org/cgi-bin/targetscan/vert_61/view_gene.cgi?taxid=9606&rs=NM_001167882&members=miR-3607-3p&showcnc=1&shownc=1&showncf=1
hsa-miR-3607-3p	MIMAT0017985	hsa-miR-3607-3p	AFAP1L2	actin filament associated protein 1-like 2	-0.1	http://www.targetscan.org/cgi-bin/targetscan/vert_61/view_gene.cgi?taxid=9606&rs=NM_001001936&members=miR-3607-3p&showcnc=1&shownc=1&showncf=1
hsa-miR-3607-3p	MIMAT0017985	hsa-miR-3607-3p	CD47	CD47 molecule	-0.1	http://www.targetscan.org/cgi-bin/targetscan/vert_61/view_gene.cgi?taxid=9606&rs=NM_001777&members=miR-3607-3p&showcnc=1&shownc=1&showncf=1
hsa-miR-3607-3p	MIMAT0017985	hsa-miR-3607-3p	EFHC1	EF-hand domain (C-terminal) containing 1	-0.1	http://www.targetscan.org/cgi-bin/targetscan/vert_61/view_gene.cgi?taxid=9606&rs=NM_001172420&members=miR-3607-3p&showcnc=1&shownc=1&showncf=1
hsa-miR-3607-3p	MIMAT0017985	hsa-miR-3607-3p	FAM57B	family with sequence similarity 57, member B	-0.1	http://www.targetscan.org/cgi-bin/targetscan/vert_61/view_gene.cgi?taxid=9606&rs=NM_031478&members=miR-3607-3p&showcnc=1&shownc=1&showncf=1
hsa-miR-3607-3p	MIMAT0017985	hsa-miR-3607-3p	CSRNP3	cysteine-serine-rich nuclear protein 3	-0.1	http://www.targetscan.org/cgi-bin/targetscan/vert_61/view_gene.cgi?taxid=9606&rs=NM_001172173&members=miR-3607-3p&showcnc=1&shownc=1&showncf=1
hsa-miR-3607-3p	MIMAT0017985	hsa-miR-3607-3p	ABL2	v-abl Abelson murine leukemia viral oncogene homolog 2	-0.1	http://www.targetscan.org/cgi-bin/targetscan/vert_61/view_gene.cgi?taxid=9606&rs=NM_001136000&members=miR-3607-3p&showcnc=1&shownc=1&showncf=1
hsa-miR-3607-3p	MIMAT0017985	hsa-miR-3607-3p	B3GNT1	UDP-GlcNAc:betaGal beta-1,3-N-acetylglucosaminyltransferase 1	-0.1	http://www.targetscan.org/cgi-bin/targetscan/vert_61/view_gene.cgi?taxid=9606&rs=NM_006876&members=miR-3607-3p&showcnc=1&shownc=1&showncf=1
hsa-miR-3607-3p	MIMAT0017985	hsa-miR-3607-3p	SLC41A1	solute carrier family 41, member 1	-0.1	http://www.targetscan.org/cgi-bin/targetscan/vert_61/view_gene.cgi?taxid=9606&rs=NM_173854&members=miR-3607-3p&showcnc=1&shownc=1&showncf=1
hsa-miR-3607-3p	MIMAT0017985	hsa-miR-3607-3p	CD2AP	CD2-associated protein	-0.1	http://www.targetscan.org/cgi-bin/targetscan/vert_61/view_gene.cgi?taxid=9606&rs=NM_012120&members=miR-3607-3p&showcnc=1&shownc=1&showncf=1
hsa-miR-3607-3p	MIMAT0017985	hsa-miR-3607-3p	TOP1	topoisomerase (DNA) I	-0.1	http://www.targetscan.org/cgi-bin/targetscan/vert_61/view_gene.cgi?taxid=9606&rs=NM_003286&members=miR-3607-3p&showcnc=1&shownc=1&showncf=1
hsa-miR-3607-3p	MIMAT0017985	hsa-miR-3607-3p	ILF3	interleukin enhancer binding factor 3, 90kDa	-0.1	http://www.targetscan.org/cgi-bin/targetscan/vert_61/view_gene.cgi?taxid=9606&rs=NM_001137673&members=miR-3607-3p&showcnc=1&shownc=1&showncf=1
hsa-miR-3607-3p	MIMAT0017985	hsa-miR-3607-3p	RASSF8	Ras association (RalGDS/AF-6) domain family (N-terminal) member 8	-0.09	http://www.targetscan.org/cgi-bin/targetscan/vert_61/view_gene.cgi?taxid=9606&rs=NM_001164746&members=miR-3607-3p&showcnc=1&shownc=1&showncf=1
hsa-miR-3607-3p	MIMAT0017985	hsa-miR-3607-3p	FOXO3	forkhead box O3	-0.09	http://www.targetscan.org/cgi-bin/targetscan/vert_61/view_gene.cgi?taxid=9606&rs=NM_001455&members=miR-3607-3p&showcnc=1&shownc=1&showncf=1
hsa-miR-3607-3p	MIMAT0017985	hsa-miR-3607-3p	PBX1	pre-B-cell leukemia homeobox 1	-0.09	http://www.targetscan.org/cgi-bin/targetscan/vert_61/view_gene.cgi?taxid=9606&rs=NM_001204961&members=miR-3607-3p&showcnc=1&shownc=1&showncf=1
hsa-miR-3607-3p	MIMAT0017985	hsa-miR-3607-3p	NMT2	N-myristoyltransferase 2	-0.09	http://www.targetscan.org/cgi-bin/targetscan/vert_61/view_gene.cgi?taxid=9606&rs=NM_004808&members=miR-3607-3p&showcnc=1&shownc=1&showncf=1
hsa-miR-3607-3p	MIMAT0017985	hsa-miR-3607-3p	TWF1	twinfilin, actin-binding protein, homolog 1 (Drosophila)	-0.09	http://www.targetscan.org/cgi-bin/targetscan/vert_61/view_gene.cgi?taxid=9606&rs=NM_001242397&members=miR-3607-3p&showcnc=1&shownc=1&showncf=1
hsa-miR-3607-3p	MIMAT0017985	hsa-miR-3607-3p	PCSK1	proprotein convertase subtilisin/kexin type 1	-0.09	http://www.targetscan.org/cgi-bin/targetscan/vert_61/view_gene.cgi?taxid=9606&rs=NM_000439&members=miR-3607-3p&showcnc=1&shownc=1&showncf=1
hsa-miR-3607-3p	MIMAT0017985	hsa-miR-3607-3p	PTPN21	protein tyrosine phosphatase, non-receptor type 21	-0.09	http://www.targetscan.org/cgi-bin/targetscan/vert_61/view_gene.cgi?taxid=9606&rs=NM_007039&members=miR-3607-3p&showcnc=1&shownc=1&showncf=1
hsa-miR-3607-3p	MIMAT0017985	hsa-miR-3607-3p	KIAA1324L	KIAA1324-like	-0.09	http://www.targetscan.org/cgi-bin/targetscan/vert_61/view_gene.cgi?taxid=9606&rs=NM_001142749&members=miR-3607-3p&showcnc=1&shownc=1&showncf=1
hsa-miR-3607-3p	MIMAT0017985	hsa-miR-3607-3p	TSLP	thymic stromal lymphopoietin	-0.09	http://www.targetscan.org/cgi-bin/targetscan/vert_61/view_gene.cgi?taxid=9606&rs=NM_033035&members=miR-3607-3p&showcnc=1&shownc=1&showncf=1
hsa-miR-3607-3p	MIMAT0017985	hsa-miR-3607-3p	STK4	serine/threonine kinase 4	-0.09	http://www.targetscan.org/cgi-bin/targetscan/vert_61/view_gene.cgi?taxid=9606&rs=NM_006282&members=miR-3607-3p&showcnc=1&shownc=1&showncf=1
hsa-miR-3607-3p	MIMAT0017985	hsa-miR-3607-3p	CTTNBP2NL	CTTNBP2 N-terminal like	-0.09	http://www.targetscan.org/cgi-bin/targetscan/vert_61/view_gene.cgi?taxid=9606&rs=NM_018704&members=miR-3607-3p&showcnc=1&shownc=1&showncf=1
hsa-miR-3607-3p	MIMAT0017985	hsa-miR-3607-3p	LYST	lysosomal trafficking regulator	-0.09	http://www.targetscan.org/cgi-bin/targetscan/vert_61/view_gene.cgi?taxid=9606&rs=NM_000081&members=miR-3607-3p&showcnc=1&shownc=1&showncf=1
hsa-miR-3607-3p	MIMAT0017985	hsa-miR-3607-3p	ODZ1	odz, odd Oz/ten-m homolog 1 (Drosophila)	-0.09	http://www.targetscan.org/cgi-bin/targetscan/vert_61/view_gene.cgi?taxid=9606&rs=NM_001163278&members=miR-3607-3p&showcnc=1&shownc=1&showncf=1
hsa-miR-3607-3p	MIMAT0017985	hsa-miR-3607-3p	QKI	quaking homolog, KH domain RNA binding (mouse)	>-0.09	http://www.targetscan.org/cgi-bin/targetscan/vert_61/view_gene.cgi?taxid=9606&rs=NM_006775&members=miR-3607-3p&showcnc=1&shownc=1&showncf=1
hsa-miR-3607-3p	MIMAT0017985	hsa-miR-3607-3p	PDE4D	phosphodiesterase 4D, cAMP-specific	>-0.09	http://www.targetscan.org/cgi-bin/targetscan/vert_61/view_gene.cgi?taxid=9606&rs=NM_001104631&members=miR-3607-3p&showcnc=1&shownc=1&showncf=1
hsa-miR-3607-3p	MIMAT0017985	hsa-miR-3607-3p	CPEB4	cytoplasmic polyadenylation element binding protein 4	>-0.09	http://www.targetscan.org/cgi-bin/targetscan/vert_61/view_gene.cgi?taxid=9606&rs=NM_030627&members=miR-3607-3p&showcnc=1&shownc=1&showncf=1
hsa-miR-3607-3p	MIMAT0017985	hsa-miR-3607-3p	SV2B	synaptic vesicle glycoprotein 2B	>-0.09	http://www.targetscan.org/cgi-bin/targetscan/vert_61/view_gene.cgi?taxid=9606&rs=NM_001167580&members=miR-3607-3p&showcnc=1&shownc=1&showncf=1
hsa-miR-3607-3p	MIMAT0017985	hsa-miR-3607-3p	NUFIP2	nuclear fragile X mental retardation protein interacting protein 2	>-0.09	http://www.targetscan.org/cgi-bin/targetscan/vert_61/view_gene.cgi?taxid=9606&rs=NM_020772&members=miR-3607-3p&showcnc=1&shownc=1&showncf=1
hsa-miR-3607-3p	MIMAT0017985	hsa-miR-3607-3p	IGF2R	insulin-like growth factor 2 receptor	-0.09	http://www.targetscan.org/cgi-bin/targetscan/vert_61/view_gene.cgi?taxid=9606&rs=NM_000876&members=miR-3607-3p&showcnc=1&shownc=1&showncf=1
hsa-miR-3607-3p	MIMAT0017985	hsa-miR-3607-3p	RNF44	ring finger protein 44	-0.09	http://www.targetscan.org/cgi-bin/targetscan/vert_61/view_gene.cgi?taxid=9606&rs=NM_014901&members=miR-3607-3p&showcnc=1&shownc=1&showncf=1
hsa-miR-3607-3p	MIMAT0017985	hsa-miR-3607-3p	JAG2	jagged 2	-0.09	http://www.targetscan.org/cgi-bin/targetscan/vert_61/view_gene.cgi?taxid=9606&rs=NM_002226&members=miR-3607-3p&showcnc=1&shownc=1&showncf=1
hsa-miR-3607-3p	MIMAT0017985	hsa-miR-3607-3p	LMLN	leishmanolysin-like (metallopeptidase M8 family)	-0.09	http://www.targetscan.org/cgi-bin/targetscan/vert_61/view_gene.cgi?taxid=9606&rs=NM_001136049&members=miR-3607-3p&showcnc=1&shownc=1&showncf=1
hsa-miR-3607-3p	MIMAT0017985	hsa-miR-3607-3p	ULK2	unc-51-like kinase 2 (C. elegans)	-0.09	http://www.targetscan.org/cgi-bin/targetscan/vert_61/view_gene.cgi?taxid=9606&rs=NM_014683&members=miR-3607-3p&showcnc=1&shownc=1&showncf=1
hsa-miR-3607-3p	MIMAT0017985	hsa-miR-3607-3p	RHOBTB1	Rho-related BTB domain containing 1	-0.09	http://www.targetscan.org/cgi-bin/targetscan/vert_61/view_gene.cgi?taxid=9606&rs=NM_001242359&members=miR-3607-3p&showcnc=1&shownc=1&showncf=1
hsa-miR-3607-3p	MIMAT0017985	hsa-miR-3607-3p	C15orf29	chromosome 15 open reading frame 29	-0.09	http://www.targetscan.org/cgi-bin/targetscan/vert_61/view_gene.cgi?taxid=9606&rs=NM_024713&members=miR-3607-3p&showcnc=1&shownc=1&showncf=1
hsa-miR-3607-3p	MIMAT0017985	hsa-miR-3607-3p	TNRC6A	trinucleotide repeat containing 6A	-0.09	http://www.targetscan.org/cgi-bin/targetscan/vert_61/view_gene.cgi?taxid=9606&rs=NM_014494&members=miR-3607-3p&showcnc=1&shownc=1&showncf=1
hsa-miR-3607-3p	MIMAT0017985	hsa-miR-3607-3p	KIAA0040	KIAA0040	-0.09	http://www.targetscan.org/cgi-bin/targetscan/vert_61/view_gene.cgi?taxid=9606&rs=NM_001162893&members=miR-3607-3p&showcnc=1&shownc=1&showncf=1
hsa-miR-3607-3p	MIMAT0017985	hsa-miR-3607-3p	ITGB8	integrin, beta 8	-0.09	http://www.targetscan.org/cgi-bin/targetscan/vert_61/view_gene.cgi?taxid=9606&rs=NM_002214&members=miR-3607-3p&showcnc=1&shownc=1&showncf=1
hsa-miR-3607-3p	MIMAT0017985	hsa-miR-3607-3p	MGMT	O-6-methylguanine-DNA methyltransferase	-0.09	http://www.targetscan.org/cgi-bin/targetscan/vert_61/view_gene.cgi?taxid=9606&rs=NM_002412&members=miR-3607-3p&showcnc=1&shownc=1&showncf=1
hsa-miR-3607-3p	MIMAT0017985	hsa-miR-3607-3p	KIAA2022	KIAA2022	-0.08	http://www.targetscan.org/cgi-bin/targetscan/vert_61/view_gene.cgi?taxid=9606&rs=NM_001008537&members=miR-3607-3p&showcnc=1&shownc=1&showncf=1
hsa-miR-3607-3p	MIMAT0017985	hsa-miR-3607-3p	UBN2	ubinuclein 2	-0.08	http://www.targetscan.org/cgi-bin/targetscan/vert_61/view_gene.cgi?taxid=9606&rs=NM_173569&members=miR-3607-3p&showcnc=1&shownc=1&showncf=1
hsa-miR-3607-3p	MIMAT0017985	hsa-miR-3607-3p	GIGYF1	GRB10 interacting GYF protein 1	-0.08	http://www.targetscan.org/cgi-bin/targetscan/vert_61/view_gene.cgi?taxid=9606&rs=NM_022574&members=miR-3607-3p&showcnc=1&shownc=1&showncf=1
hsa-miR-3607-3p	MIMAT0017985	hsa-miR-3607-3p	PPID	peptidylprolyl isomerase D	-0.08	http://www.targetscan.org/cgi-bin/targetscan/vert_61/view_gene.cgi?taxid=9606&rs=NM_005038&members=miR-3607-3p&showcnc=1&shownc=1&showncf=1
hsa-miR-3607-3p	MIMAT0017985	hsa-miR-3607-3p	NLGN3	neuroligin 3	-0.08	http://www.targetscan.org/cgi-bin/targetscan/vert_61/view_gene.cgi?taxid=9606&rs=NM_001166660&members=miR-3607-3p&showcnc=1&shownc=1&showncf=1
hsa-miR-3607-3p	MIMAT0017985	hsa-miR-3607-3p	CBL	Cas-Br-M (murine) ecotropic retroviral transforming sequence	-0.08	http://www.targetscan.org/cgi-bin/targetscan/vert_61/view_gene.cgi?taxid=9606&rs=NM_005188&members=miR-3607-3p&showcnc=1&shownc=1&showncf=1
hsa-miR-3607-3p	MIMAT0017985	hsa-miR-3607-3p	NRIP1	nuclear receptor interacting protein 1	-0.08	http://www.targetscan.org/cgi-bin/targetscan/vert_61/view_gene.cgi?taxid=9606&rs=NM_003489&members=miR-3607-3p&showcnc=1&shownc=1&showncf=1
hsa-miR-3607-3p	MIMAT0017985	hsa-miR-3607-3p	ELAVL2	ELAV (embryonic lethal, abnormal vision, Drosophila)-like 2 (Hu antigen B)	-0.08	http://www.targetscan.org/cgi-bin/targetscan/vert_61/view_gene.cgi?taxid=9606&rs=NM_001171195&members=miR-3607-3p&showcnc=1&shownc=1&showncf=1
hsa-miR-3607-3p	MIMAT0017985	hsa-miR-3607-3p	TMEM161B	transmembrane protein 161B	-0.08	http://www.targetscan.org/cgi-bin/targetscan/vert_61/view_gene.cgi?taxid=9606&rs=NM_153354&members=miR-3607-3p&showcnc=1&shownc=1&showncf=1
hsa-miR-3607-3p	MIMAT0017985	hsa-miR-3607-3p	UBE2V2	ubiquitin-conjugating enzyme E2 variant 2	-0.08	http://www.targetscan.org/cgi-bin/targetscan/vert_61/view_gene.cgi?taxid=9606&rs=NM_003350&members=miR-3607-3p&showcnc=1&shownc=1&showncf=1
hsa-miR-3607-3p	MIMAT0017985	hsa-miR-3607-3p	MEX3D	mex-3 homolog D (C. elegans)	-0.08	http://www.targetscan.org/cgi-bin/targetscan/vert_61/view_gene.cgi?taxid=9606&rs=NM_203304&members=miR-3607-3p&showcnc=1&shownc=1&showncf=1
hsa-miR-3607-3p	MIMAT0017985	hsa-miR-3607-3p	TXLNG	taxilin gamma	-0.08	http://www.targetscan.org/cgi-bin/targetscan/vert_61/view_gene.cgi?taxid=9606&rs=NM_001168683&members=miR-3607-3p&showcnc=1&shownc=1&showncf=1
hsa-miR-3607-3p	MIMAT0017985	hsa-miR-3607-3p	SERTAD2	SERTA domain containing 2	-0.08	http://www.targetscan.org/cgi-bin/targetscan/vert_61/view_gene.cgi?taxid=9606&rs=NM_014755&members=miR-3607-3p&showcnc=1&shownc=1&showncf=1
hsa-miR-3607-3p	MIMAT0017985	hsa-miR-3607-3p	SLC30A8	solute carrier family 30 (zinc transporter), member 8	-0.08	http://www.targetscan.org/cgi-bin/targetscan/vert_61/view_gene.cgi?taxid=9606&rs=NM_001172811&members=miR-3607-3p&showcnc=1&shownc=1&showncf=1
hsa-miR-3607-3p	MIMAT0017985	hsa-miR-3607-3p	ATRNL1	attractin-like 1	-0.08	http://www.targetscan.org/cgi-bin/targetscan/vert_61/view_gene.cgi?taxid=9606&rs=NM_207303&members=miR-3607-3p&showcnc=1&shownc=1&showncf=1
hsa-miR-3607-3p	MIMAT0017985	hsa-miR-3607-3p	UBR5	ubiquitin protein ligase E3 component n-recognin 5	-0.08	http://www.targetscan.org/cgi-bin/targetscan/vert_61/view_gene.cgi?taxid=9606&rs=NM_015902&members=miR-3607-3p&showcnc=1&shownc=1&showncf=1
hsa-miR-3607-3p	MIMAT0017985	hsa-miR-3607-3p	SLC30A9	solute carrier family 30 (zinc transporter), member 9	-0.08	http://www.targetscan.org/cgi-bin/targetscan/vert_61/view_gene.cgi?taxid=9606&rs=NM_006345&members=miR-3607-3p&showcnc=1&shownc=1&showncf=1
hsa-miR-3607-3p	MIMAT0017985	hsa-miR-3607-3p	COG5	component of oligomeric golgi complex 5	-0.08	http://www.targetscan.org/cgi-bin/targetscan/vert_61/view_gene.cgi?taxid=9606&rs=NM_006348&members=miR-3607-3p&showcnc=1&shownc=1&showncf=1
hsa-miR-3607-3p	MIMAT0017985	hsa-miR-3607-3p	TOX	thymocyte selection-associated high mobility group box	-0.08	http://www.targetscan.org/cgi-bin/targetscan/vert_61/view_gene.cgi?taxid=9606&rs=NM_014729&members=miR-3607-3p&showcnc=1&shownc=1&showncf=1
hsa-miR-3607-3p	MIMAT0017985	hsa-miR-3607-3p	SEPT7	septin 7	-0.08	http://www.targetscan.org/cgi-bin/targetscan/vert_61/view_gene.cgi?taxid=9606&rs=NM_001011553&members=miR-3607-3p&showcnc=1&shownc=1&showncf=1
hsa-miR-3607-3p	MIMAT0017985	hsa-miR-3607-3p	MAP3K2	mitogen-activated protein kinase kinase kinase 2	-0.08	http://www.targetscan.org/cgi-bin/targetscan/vert_61/view_gene.cgi?taxid=9606&rs=NM_006609&members=miR-3607-3p&showcnc=1&shownc=1&showncf=1
hsa-miR-3607-3p	MIMAT0017985	hsa-miR-3607-3p	NKX2-2	NK2 homeobox 2	-0.08	http://www.targetscan.org/cgi-bin/targetscan/vert_61/view_gene.cgi?taxid=9606&rs=NM_002509&members=miR-3607-3p&showcnc=1&shownc=1&showncf=1
hsa-miR-3607-3p	MIMAT0017985	hsa-miR-3607-3p	INTS2	integrator complex subunit 2	-0.08	http://www.targetscan.org/cgi-bin/targetscan/vert_61/view_gene.cgi?taxid=9606&rs=NM_020748&members=miR-3607-3p&showcnc=1&shownc=1&showncf=1
hsa-miR-3607-3p	MIMAT0017985	hsa-miR-3607-3p	RFFL	ring finger and FYVE-like domain containing 1	-0.08	http://www.targetscan.org/cgi-bin/targetscan/vert_61/view_gene.cgi?taxid=9606&rs=NM_001017368&members=miR-3607-3p&showcnc=1&shownc=1&showncf=1
hsa-miR-3607-3p	MIMAT0017985	hsa-miR-3607-3p	MARK3	MAP/microtubule affinity-regulating kinase 3	-0.08	http://www.targetscan.org/cgi-bin/targetscan/vert_61/view_gene.cgi?taxid=9606&rs=NM_001128918&members=miR-3607-3p&showcnc=1&shownc=1&showncf=1
hsa-miR-3607-3p	MIMAT0017985	hsa-miR-3607-3p	NID1	nidogen 1	-0.08	http://www.targetscan.org/cgi-bin/targetscan/vert_61/view_gene.cgi?taxid=9606&rs=NM_002508&members=miR-3607-3p&showcnc=1&shownc=1&showncf=1
hsa-miR-3607-3p	MIMAT0017985	hsa-miR-3607-3p	N4BP1	NEDD4 binding protein 1	-0.08	http://www.targetscan.org/cgi-bin/targetscan/vert_61/view_gene.cgi?taxid=9606&rs=NM_153029&members=miR-3607-3p&showcnc=1&shownc=1&showncf=1
hsa-miR-3607-3p	MIMAT0017985	hsa-miR-3607-3p	AHCY	adenosylhomocysteinase	-0.08	http://www.targetscan.org/cgi-bin/targetscan/vert_61/view_gene.cgi?taxid=9606&rs=NM_000687&members=miR-3607-3p&showcnc=1&shownc=1&showncf=1
hsa-miR-3607-3p	MIMAT0017985	hsa-miR-3607-3p	PPARGC1A	peroxisome proliferator-activated receptor gamma, coactivator 1 alpha	-0.08	http://www.targetscan.org/cgi-bin/targetscan/vert_61/view_gene.cgi?taxid=9606&rs=NM_013261&members=miR-3607-3p&showcnc=1&shownc=1&showncf=1
hsa-miR-3607-3p	MIMAT0017985	hsa-miR-3607-3p	RDH10	retinol dehydrogenase 10 (all-trans)	-0.07	http://www.targetscan.org/cgi-bin/targetscan/vert_61/view_gene.cgi?taxid=9606&rs=NM_172037&members=miR-3607-3p&showcnc=1&shownc=1&showncf=1
hsa-miR-3607-3p	MIMAT0017985	hsa-miR-3607-3p	FAM109A	family with sequence similarity 109, member A	-0.07	http://www.targetscan.org/cgi-bin/targetscan/vert_61/view_gene.cgi?taxid=9606&rs=NM_001177996&members=miR-3607-3p&showcnc=1&shownc=1&showncf=1
hsa-miR-3607-3p	MIMAT0017985	hsa-miR-3607-3p	TEAD1	TEA domain family member 1 (SV40 transcriptional enhancer factor)	-0.07	http://www.targetscan.org/cgi-bin/targetscan/vert_61/view_gene.cgi?taxid=9606&rs=NM_021961&members=miR-3607-3p&showcnc=1&shownc=1&showncf=1
hsa-miR-3607-3p	MIMAT0017985	hsa-miR-3607-3p	PALM2	paralemmin 2	-0.07	http://www.targetscan.org/cgi-bin/targetscan/vert_61/view_gene.cgi?taxid=9606&rs=NM_001037293&members=miR-3607-3p&showcnc=1&shownc=1&showncf=1
hsa-miR-3607-3p	MIMAT0017985	hsa-miR-3607-3p	DSC3	desmocollin 3	-0.07	http://www.targetscan.org/cgi-bin/targetscan/vert_61/view_gene.cgi?taxid=9606&rs=NM_001941&members=miR-3607-3p&showcnc=1&shownc=1&showncf=1
hsa-miR-3607-3p	MIMAT0017985	hsa-miR-3607-3p	FLT3LG	fms-related tyrosine kinase 3 ligand	-0.07	http://www.targetscan.org/cgi-bin/targetscan/vert_61/view_gene.cgi?taxid=9606&rs=NM_001204502&members=miR-3607-3p&showcnc=1&shownc=1&showncf=1
hsa-miR-3607-3p	MIMAT0017985	hsa-miR-3607-3p	ARID1A	AT rich interactive domain 1A (SWI-like)	-0.07	http://www.targetscan.org/cgi-bin/targetscan/vert_61/view_gene.cgi?taxid=9606&rs=NM_006015&members=miR-3607-3p&showcnc=1&shownc=1&showncf=1
hsa-miR-3607-3p	MIMAT0017985	hsa-miR-3607-3p	RANBP9	RAN binding protein 9	-0.07	http://www.targetscan.org/cgi-bin/targetscan/vert_61/view_gene.cgi?taxid=9606&rs=NM_005493&members=miR-3607-3p&showcnc=1&shownc=1&showncf=1
hsa-miR-3607-3p	MIMAT0017985	hsa-miR-3607-3p	TAP2	transporter 2, ATP-binding cassette, sub-family B (MDR/TAP)	-0.07	http://www.targetscan.org/cgi-bin/targetscan/vert_61/view_gene.cgi?taxid=9606&rs=NM_000544&members=miR-3607-3p&showcnc=1&shownc=1&showncf=1
hsa-miR-3607-3p	MIMAT0017985	hsa-miR-3607-3p	ZNF704	zinc finger protein 704	-0.07	http://www.targetscan.org/cgi-bin/targetscan/vert_61/view_gene.cgi?taxid=9606&rs=NM_001033723&members=miR-3607-3p&showcnc=1&shownc=1&showncf=1
hsa-miR-3607-3p	MIMAT0017985	hsa-miR-3607-3p	IQSEC2	IQ motif and Sec7 domain 2	-0.07	http://www.targetscan.org/cgi-bin/targetscan/vert_61/view_gene.cgi?taxid=9606&rs=NM_001111125&members=miR-3607-3p&showcnc=1&shownc=1&showncf=1
hsa-miR-3607-3p	MIMAT0017985	hsa-miR-3607-3p	CDH13	cadherin 13, H-cadherin (heart)	-0.07	http://www.targetscan.org/cgi-bin/targetscan/vert_61/view_gene.cgi?taxid=9606&rs=NM_001220488&members=miR-3607-3p&showcnc=1&shownc=1&showncf=1
hsa-miR-3607-3p	MIMAT0017985	hsa-miR-3607-3p	PELI1	pellino homolog 1 (Drosophila)	-0.07	http://www.targetscan.org/cgi-bin/targetscan/vert_61/view_gene.cgi?taxid=9606&rs=NM_020651&members=miR-3607-3p&showcnc=1&shownc=1&showncf=1
hsa-miR-3607-3p	MIMAT0017985	hsa-miR-3607-3p	EIF4G2	eukaryotic translation initiation factor 4 gamma, 2	-0.07	http://www.targetscan.org/cgi-bin/targetscan/vert_61/view_gene.cgi?taxid=9606&rs=NM_001042559&members=miR-3607-3p&showcnc=1&shownc=1&showncf=1
hsa-miR-3607-3p	MIMAT0017985	hsa-miR-3607-3p	TANK	TRAF family member-associated NFKB activator	-0.07	http://www.targetscan.org/cgi-bin/targetscan/vert_61/view_gene.cgi?taxid=9606&rs=NM_001199135&members=miR-3607-3p&showcnc=1&shownc=1&showncf=1
hsa-miR-3607-3p	MIMAT0017985	hsa-miR-3607-3p	CSNK1G1	casein kinase 1, gamma 1	-0.07	http://www.targetscan.org/cgi-bin/targetscan/vert_61/view_gene.cgi?taxid=9606&rs=NM_022048&members=miR-3607-3p&showcnc=1&shownc=1&showncf=1
hsa-miR-3607-3p	MIMAT0017985	hsa-miR-3607-3p	WDR5	WD repeat domain 5	-0.07	http://www.targetscan.org/cgi-bin/targetscan/vert_61/view_gene.cgi?taxid=9606&rs=NM_017588&members=miR-3607-3p&showcnc=1&shownc=1&showncf=1
hsa-miR-3607-3p	MIMAT0017985	hsa-miR-3607-3p	MED13	mediator complex subunit 13	-0.07	http://www.targetscan.org/cgi-bin/targetscan/vert_61/view_gene.cgi?taxid=9606&rs=NM_005121&members=miR-3607-3p&showcnc=1&shownc=1&showncf=1
hsa-miR-3607-3p	MIMAT0017985	hsa-miR-3607-3p	JDP2	Jun dimerization protein 2	>-0.07	http://www.targetscan.org/cgi-bin/targetscan/vert_61/view_gene.cgi?taxid=9606&rs=NM_001135047&members=miR-3607-3p&showcnc=1&shownc=1&showncf=1
hsa-miR-3607-3p	MIMAT0017985	hsa-miR-3607-3p	ZEB2	zinc finger E-box binding homeobox 2	>-0.07	http://www.targetscan.org/cgi-bin/targetscan/vert_61/view_gene.cgi?taxid=9606&rs=NM_001171653&members=miR-3607-3p&showcnc=1&shownc=1&showncf=1
hsa-miR-3607-3p	MIMAT0017985	hsa-miR-3607-3p	SPRY3	sprouty homolog 3 (Drosophila)	>-0.07	http://www.targetscan.org/cgi-bin/targetscan/vert_61/view_gene.cgi?taxid=9606&rs=NM_005840&members=miR-3607-3p&showcnc=1&shownc=1&showncf=1
hsa-miR-3607-3p	MIMAT0017985	hsa-miR-3607-3p	SLC7A11	solute carrier family 7 (anionic amino acid transporter light chain, xc- system), member 11	>-0.07	http://www.targetscan.org/cgi-bin/targetscan/vert_61/view_gene.cgi?taxid=9606&rs=NM_014331&members=miR-3607-3p&showcnc=1&shownc=1&showncf=1
hsa-miR-3607-3p	MIMAT0017985	hsa-miR-3607-3p	FAM43A	family with sequence similarity 43, member A	-0.07	http://www.targetscan.org/cgi-bin/targetscan/vert_61/view_gene.cgi?taxid=9606&rs=NM_153690&members=miR-3607-3p&showcnc=1&shownc=1&showncf=1
hsa-miR-3607-3p	MIMAT0017985	hsa-miR-3607-3p	C6orf89	chromosome 6 open reading frame 89	-0.07	http://www.targetscan.org/cgi-bin/targetscan/vert_61/view_gene.cgi?taxid=9606&rs=NM_152734&members=miR-3607-3p&showcnc=1&shownc=1&showncf=1
hsa-miR-3607-3p	MIMAT0017985	hsa-miR-3607-3p	PDZD2	PDZ domain containing 2	-0.07	http://www.targetscan.org/cgi-bin/targetscan/vert_61/view_gene.cgi?taxid=9606&rs=NM_178140&members=miR-3607-3p&showcnc=1&shownc=1&showncf=1
hsa-miR-3607-3p	MIMAT0017985	hsa-miR-3607-3p	HERC3	hect domain and RLD 3	-0.07	http://www.targetscan.org/cgi-bin/targetscan/vert_61/view_gene.cgi?taxid=9606&rs=NM_014606&members=miR-3607-3p&showcnc=1&shownc=1&showncf=1
hsa-miR-3607-3p	MIMAT0017985	hsa-miR-3607-3p	PSMB2	proteasome (prosome, macropain) subunit, beta type, 2	-0.07	http://www.targetscan.org/cgi-bin/targetscan/vert_61/view_gene.cgi?taxid=9606&rs=NM_001199779&members=miR-3607-3p&showcnc=1&shownc=1&showncf=1
hsa-miR-3607-3p	MIMAT0017985	hsa-miR-3607-3p	TSGA14	testis specific, 14	-0.07	http://www.targetscan.org/cgi-bin/targetscan/vert_61/view_gene.cgi?taxid=9606&rs=NM_018718&members=miR-3607-3p&showcnc=1&shownc=1&showncf=1
hsa-miR-3607-3p	MIMAT0017985	hsa-miR-3607-3p	CLCC1	chloride channel CLIC-like 1	-0.07	http://www.targetscan.org/cgi-bin/targetscan/vert_61/view_gene.cgi?taxid=9606&rs=NM_001048210&members=miR-3607-3p&showcnc=1&shownc=1&showncf=1
hsa-miR-3607-3p	MIMAT0017985	hsa-miR-3607-3p	FAM160B1	family with sequence similarity 160, member B1	-0.07	http://www.targetscan.org/cgi-bin/targetscan/vert_61/view_gene.cgi?taxid=9606&rs=NM_020940&members=miR-3607-3p&showcnc=1&shownc=1&showncf=1
hsa-miR-3607-3p	MIMAT0017985	hsa-miR-3607-3p	SLC25A22	solute carrier family 25 (mitochondrial carrier: glutamate), member 22	-0.07	http://www.targetscan.org/cgi-bin/targetscan/vert_61/view_gene.cgi?taxid=9606&rs=NM_001191060&members=miR-3607-3p&showcnc=1&shownc=1&showncf=1
hsa-miR-3607-3p	MIMAT0017985	hsa-miR-3607-3p	UBE2D1	ubiquitin-conjugating enzyme E2D 1	-0.07	http://www.targetscan.org/cgi-bin/targetscan/vert_61/view_gene.cgi?taxid=9606&rs=NM_001204880&members=miR-3607-3p&showcnc=1&shownc=1&showncf=1
hsa-miR-3607-3p	MIMAT0017985	hsa-miR-3607-3p	SSX2IP	synovial sarcoma, X breakpoint 2 interacting protein	-0.07	http://www.targetscan.org/cgi-bin/targetscan/vert_61/view_gene.cgi?taxid=9606&rs=NM_001166293&members=miR-3607-3p&showcnc=1&shownc=1&showncf=1
hsa-miR-3607-3p	MIMAT0017985	hsa-miR-3607-3p	MYL12A	myosin, light chain 12A, regulatory, non-sarcomeric	-0.07	http://www.targetscan.org/cgi-bin/targetscan/vert_61/view_gene.cgi?taxid=9606&rs=NM_006471&members=miR-3607-3p&showcnc=1&shownc=1&showncf=1
hsa-miR-3607-3p	MIMAT0017985	hsa-miR-3607-3p	IGDCC4	immunoglobulin superfamily, DCC subclass, member 4	-0.07	http://www.targetscan.org/cgi-bin/targetscan/vert_61/view_gene.cgi?taxid=9606&rs=NM_020962&members=miR-3607-3p&showcnc=1&shownc=1&showncf=1
hsa-miR-3607-3p	MIMAT0017985	hsa-miR-3607-3p	BMPR2	bone morphogenetic protein receptor, type II (serine/threonine kinase)	-0.07	http://www.targetscan.org/cgi-bin/targetscan/vert_61/view_gene.cgi?taxid=9606&rs=NM_001204&members=miR-3607-3p&showcnc=1&shownc=1&showncf=1
hsa-miR-3607-3p	MIMAT0017985	hsa-miR-3607-3p	HIPK1	homeodomain interacting protein kinase 1	-0.07	http://www.targetscan.org/cgi-bin/targetscan/vert_61/view_gene.cgi?taxid=9606&rs=NM_181358&members=miR-3607-3p&showcnc=1&shownc=1&showncf=1
hsa-miR-3607-3p	MIMAT0017985	hsa-miR-3607-3p	NFAT5	nuclear factor of activated T-cells 5, tonicity-responsive	-0.07	http://www.targetscan.org/cgi-bin/targetscan/vert_61/view_gene.cgi?taxid=9606&rs=NM_001113178&members=miR-3607-3p&showcnc=1&shownc=1&showncf=1
hsa-miR-3607-3p	MIMAT0017985	hsa-miR-3607-3p	NFX1	nuclear transcription factor, X-box binding 1	-0.07	http://www.targetscan.org/cgi-bin/targetscan/vert_61/view_gene.cgi?taxid=9606&rs=NM_002504&members=miR-3607-3p&showcnc=1&shownc=1&showncf=1
hsa-miR-3607-3p	MIMAT0017985	hsa-miR-3607-3p	SLC9A4	solute carrier family 9 (sodium/hydrogen exchanger), member 4	-0.07	http://www.targetscan.org/cgi-bin/targetscan/vert_61/view_gene.cgi?taxid=9606&rs=NM_001011552&members=miR-3607-3p&showcnc=1&shownc=1&showncf=1
hsa-miR-3607-3p	MIMAT0017985	hsa-miR-3607-3p	SIRT5	sirtuin 5	-0.06	http://www.targetscan.org/cgi-bin/targetscan/vert_61/view_gene.cgi?taxid=9606&rs=NM_031244&members=miR-3607-3p&showcnc=1&shownc=1&showncf=1
hsa-miR-3607-3p	MIMAT0017985	hsa-miR-3607-3p	SCYL3	SCY1-like 3 (S. cerevisiae)	-0.06	http://www.targetscan.org/cgi-bin/targetscan/vert_61/view_gene.cgi?taxid=9606&rs=NM_020423&members=miR-3607-3p&showcnc=1&shownc=1&showncf=1
hsa-miR-3607-3p	MIMAT0017985	hsa-miR-3607-3p	MARK1	MAP/microtubule affinity-regulating kinase 1	-0.06	http://www.targetscan.org/cgi-bin/targetscan/vert_61/view_gene.cgi?taxid=9606&rs=NM_018650&members=miR-3607-3p&showcnc=1&shownc=1&showncf=1
hsa-miR-3607-3p	MIMAT0017985	hsa-miR-3607-3p	RNMT	RNA (guanine-7-) methyltransferase	-0.06	http://www.targetscan.org/cgi-bin/targetscan/vert_61/view_gene.cgi?taxid=9606&rs=NM_003799&members=miR-3607-3p&showcnc=1&shownc=1&showncf=1
hsa-miR-3607-3p	MIMAT0017985	hsa-miR-3607-3p	AVEN	apoptosis, caspase activation inhibitor	-0.06	http://www.targetscan.org/cgi-bin/targetscan/vert_61/view_gene.cgi?taxid=9606&rs=NM_020371&members=miR-3607-3p&showcnc=1&shownc=1&showncf=1
hsa-miR-3607-3p	MIMAT0017985	hsa-miR-3607-3p	FOXO1	forkhead box O1	-0.06	http://www.targetscan.org/cgi-bin/targetscan/vert_61/view_gene.cgi?taxid=9606&rs=NM_002015&members=miR-3607-3p&showcnc=1&shownc=1&showncf=1
hsa-miR-3607-3p	MIMAT0017985	hsa-miR-3607-3p	RGL1	ral guanine nucleotide dissociation stimulator-like 1	-0.06	http://www.targetscan.org/cgi-bin/targetscan/vert_61/view_gene.cgi?taxid=9606&rs=NM_015149&members=miR-3607-3p&showcnc=1&shownc=1&showncf=1
hsa-miR-3607-3p	MIMAT0017985	hsa-miR-3607-3p	BCOR	BCL6 corepressor	-0.06	http://www.targetscan.org/cgi-bin/targetscan/vert_61/view_gene.cgi?taxid=9606&rs=NM_001123383&members=miR-3607-3p&showcnc=1&shownc=1&showncf=1
hsa-miR-3607-3p	MIMAT0017985	hsa-miR-3607-3p	SCN2A	sodium channel, voltage-gated, type II, alpha subunit	-0.06	http://www.targetscan.org/cgi-bin/targetscan/vert_61/view_gene.cgi?taxid=9606&rs=NM_001040142&members=miR-3607-3p&showcnc=1&shownc=1&showncf=1
hsa-miR-3607-3p	MIMAT0017985	hsa-miR-3607-3p	KIAA1045	KIAA1045	-0.06	http://www.targetscan.org/cgi-bin/targetscan/vert_61/view_gene.cgi?taxid=9606&rs=NM_015297&members=miR-3607-3p&showcnc=1&shownc=1&showncf=1
hsa-miR-3607-3p	MIMAT0017985	hsa-miR-3607-3p	GALNT6	UDP-N-acetyl-alpha-D-galactosamine:polypeptide N-acetylgalactosaminyltransferase 6 (GalNAc-T6)	>-0.06	http://www.targetscan.org/cgi-bin/targetscan/vert_61/view_gene.cgi?taxid=9606&rs=NM_007210&members=miR-3607-3p&showcnc=1&shownc=1&showncf=1
hsa-miR-3607-3p	MIMAT0017985	hsa-miR-3607-3p	ZNF770	zinc finger protein 770	>-0.06	http://www.targetscan.org/cgi-bin/targetscan/vert_61/view_gene.cgi?taxid=9606&rs=NM_014106&members=miR-3607-3p&showcnc=1&shownc=1&showncf=1
hsa-miR-3607-3p	MIMAT0017985	hsa-miR-3607-3p	ILDR2	immunoglobulin-like domain containing receptor 2	>-0.06	http://www.targetscan.org/cgi-bin/targetscan/vert_61/view_gene.cgi?taxid=9606&rs=NM_199351&members=miR-3607-3p&showcnc=1&shownc=1&showncf=1
hsa-miR-3607-3p	MIMAT0017985	hsa-miR-3607-3p	SH3PXD2A	SH3 and PX domains 2A	>-0.06	http://www.targetscan.org/cgi-bin/targetscan/vert_61/view_gene.cgi?taxid=9606&rs=NM_014631&members=miR-3607-3p&showcnc=1&shownc=1&showncf=1
hsa-miR-3607-3p	MIMAT0017985	hsa-miR-3607-3p	FBXW2	F-box and WD repeat domain containing 2	>-0.06	http://www.targetscan.org/cgi-bin/targetscan/vert_61/view_gene.cgi?taxid=9606&rs=NM_012164&members=miR-3607-3p&showcnc=1&shownc=1&showncf=1
hsa-miR-3607-3p	MIMAT0017985	hsa-miR-3607-3p	LMAN1	lectin, mannose-binding, 1	>-0.06	http://www.targetscan.org/cgi-bin/targetscan/vert_61/view_gene.cgi?taxid=9606&rs=NM_005570&members=miR-3607-3p&showcnc=1&shownc=1&showncf=1
hsa-miR-3607-3p	MIMAT0017985	hsa-miR-3607-3p	CLIP3	CAP-GLY domain containing linker protein 3	-0.06	http://www.targetscan.org/cgi-bin/targetscan/vert_61/view_gene.cgi?taxid=9606&rs=NM_001199570&members=miR-3607-3p&showcnc=1&shownc=1&showncf=1
hsa-miR-3607-3p	MIMAT0017985	hsa-miR-3607-3p	MFSD6	major facilitator superfamily domain containing 6	-0.06	http://www.targetscan.org/cgi-bin/targetscan/vert_61/view_gene.cgi?taxid=9606&rs=NM_017694&members=miR-3607-3p&showcnc=1&shownc=1&showncf=1
hsa-miR-3607-3p	MIMAT0017985	hsa-miR-3607-3p	CCDC120	coiled-coil domain containing 120	-0.06	http://www.targetscan.org/cgi-bin/targetscan/vert_61/view_gene.cgi?taxid=9606&rs=NM_001163321&members=miR-3607-3p&showcnc=1&shownc=1&showncf=1
hsa-miR-3607-3p	MIMAT0017985	hsa-miR-3607-3p	ORC4	origin recognition complex, subunit 4	-0.06	http://www.targetscan.org/cgi-bin/targetscan/vert_61/view_gene.cgi?taxid=9606&rs=NM_001190879&members=miR-3607-3p&showcnc=1&shownc=1&showncf=1
hsa-miR-3607-3p	MIMAT0017985	hsa-miR-3607-3p	SOS1	son of sevenless homolog 1 (Drosophila)	-0.06	http://www.targetscan.org/cgi-bin/targetscan/vert_61/view_gene.cgi?taxid=9606&rs=NM_005633&members=miR-3607-3p&showcnc=1&shownc=1&showncf=1
hsa-miR-3607-3p	MIMAT0017985	hsa-miR-3607-3p	NUDT11	nudix (nucleoside diphosphate linked moiety X)-type motif 11	-0.06	http://www.targetscan.org/cgi-bin/targetscan/vert_61/view_gene.cgi?taxid=9606&rs=NM_018159&members=miR-3607-3p&showcnc=1&shownc=1&showncf=1
hsa-miR-3607-3p	MIMAT0017985	hsa-miR-3607-3p	TCF7	transcription factor 7 (T-cell specific, HMG-box)	-0.06	http://www.targetscan.org/cgi-bin/targetscan/vert_61/view_gene.cgi?taxid=9606&rs=NM_001134851&members=miR-3607-3p&showcnc=1&shownc=1&showncf=1
hsa-miR-3607-3p	MIMAT0017985	hsa-miR-3607-3p	GXYLT1	glucoside xylosyltransferase 1	-0.06	http://www.targetscan.org/cgi-bin/targetscan/vert_61/view_gene.cgi?taxid=9606&rs=NM_001099650&members=miR-3607-3p&showcnc=1&shownc=1&showncf=1
hsa-miR-3607-3p	MIMAT0017985	hsa-miR-3607-3p	NR3C2	nuclear receptor subfamily 3, group C, member 2	-0.06	http://www.targetscan.org/cgi-bin/targetscan/vert_61/view_gene.cgi?taxid=9606&rs=NM_000901&members=miR-3607-3p&showcnc=1&shownc=1&showncf=1
hsa-miR-3607-3p	MIMAT0017985	hsa-miR-3607-3p	FCRL4	Fc receptor-like 4	-0.06	http://www.targetscan.org/cgi-bin/targetscan/vert_61/view_gene.cgi?taxid=9606&rs=NM_031282&members=miR-3607-3p&showcnc=1&shownc=1&showncf=1
hsa-miR-3607-3p	MIMAT0017985	hsa-miR-3607-3p	NUAK1	NUAK family, SNF1-like kinase, 1	-0.06	http://www.targetscan.org/cgi-bin/targetscan/vert_61/view_gene.cgi?taxid=9606&rs=NM_014840&members=miR-3607-3p&showcnc=1&shownc=1&showncf=1
hsa-miR-3607-3p	MIMAT0017985	hsa-miR-3607-3p	ARID4B	AT rich interactive domain 4B (RBP1-like)	-0.06	http://www.targetscan.org/cgi-bin/targetscan/vert_61/view_gene.cgi?taxid=9606&rs=NM_001206794&members=miR-3607-3p&showcnc=1&shownc=1&showncf=1
hsa-miR-3607-3p	MIMAT0017985	hsa-miR-3607-3p	CHD7	chromodomain helicase DNA binding protein 7	-0.06	http://www.targetscan.org/cgi-bin/targetscan/vert_61/view_gene.cgi?taxid=9606&rs=NM_017780&members=miR-3607-3p&showcnc=1&shownc=1&showncf=1
hsa-miR-3607-3p	MIMAT0017985	hsa-miR-3607-3p	FBRSL1	fibrosin-like 1	-0.06	http://www.targetscan.org/cgi-bin/targetscan/vert_61/view_gene.cgi?taxid=9606&rs=NM_001142641&members=miR-3607-3p&showcnc=1&shownc=1&showncf=1
hsa-miR-3607-3p	MIMAT0017985	hsa-miR-3607-3p	SEZ6L	seizure related 6 homolog (mouse)-like	-0.05	http://www.targetscan.org/cgi-bin/targetscan/vert_61/view_gene.cgi?taxid=9606&rs=NM_001184773&members=miR-3607-3p&showcnc=1&shownc=1&showncf=1
hsa-miR-3607-3p	MIMAT0017985	hsa-miR-3607-3p	NAV1	neuron navigator 1	>-0.05	http://www.targetscan.org/cgi-bin/targetscan/vert_61/view_gene.cgi?taxid=9606&rs=NM_001167738&members=miR-3607-3p&showcnc=1&shownc=1&showncf=1
hsa-miR-3607-3p	MIMAT0017985	hsa-miR-3607-3p	SLC22A23	solute carrier family 22, member 23	-0.05	http://www.targetscan.org/cgi-bin/targetscan/vert_61/view_gene.cgi?taxid=9606&rs=NM_015482&members=miR-3607-3p&showcnc=1&shownc=1&showncf=1
hsa-miR-3607-3p	MIMAT0017985	hsa-miR-3607-3p	CBX1	chromobox homolog 1	-0.05	http://www.targetscan.org/cgi-bin/targetscan/vert_61/view_gene.cgi?taxid=9606&rs=NM_001127228&members=miR-3607-3p&showcnc=1&shownc=1&showncf=1
hsa-miR-3607-3p	MIMAT0017985	hsa-miR-3607-3p	AP3D1	adaptor-related protein complex 3, delta 1 subunit	-0.05	http://www.targetscan.org/cgi-bin/targetscan/vert_61/view_gene.cgi?taxid=9606&rs=NM_001077523&members=miR-3607-3p&showcnc=1&shownc=1&showncf=1
hsa-miR-3607-3p	MIMAT0017985	hsa-miR-3607-3p	MIDN	midnolin	-0.05	http://www.targetscan.org/cgi-bin/targetscan/vert_61/view_gene.cgi?taxid=9606&rs=NM_177401&members=miR-3607-3p&showcnc=1&shownc=1&showncf=1
hsa-miR-3607-3p	MIMAT0017985	hsa-miR-3607-3p	RAPH1	Ras association (RalGDS/AF-6) and pleckstrin homology domains 1	-0.05	http://www.targetscan.org/cgi-bin/targetscan/vert_61/view_gene.cgi?taxid=9606&rs=NM_213589&members=miR-3607-3p&showcnc=1&shownc=1&showncf=1
hsa-miR-3607-3p	MIMAT0017985	hsa-miR-3607-3p	MYCL1	v-myc myelocytomatosis viral oncogene homolog 1, lung carcinoma derived (avian)	-0.05	http://www.targetscan.org/cgi-bin/targetscan/vert_61/view_gene.cgi?taxid=9606&rs=NM_001033081&members=miR-3607-3p&showcnc=1&shownc=1&showncf=1
hsa-miR-3607-3p	MIMAT0017985	hsa-miR-3607-3p	PPFIBP1	PTPRF interacting protein, binding protein 1 (liprin beta 1)	-0.05	http://www.targetscan.org/cgi-bin/targetscan/vert_61/view_gene.cgi?taxid=9606&rs=NM_001198915&members=miR-3607-3p&showcnc=1&shownc=1&showncf=1
hsa-miR-3607-3p	MIMAT0017985	hsa-miR-3607-3p	ZDHHC15	zinc finger, DHHC-type containing 15	-0.05	http://www.targetscan.org/cgi-bin/targetscan/vert_61/view_gene.cgi?taxid=9606&rs=NM_001146256&members=miR-3607-3p&showcnc=1&shownc=1&showncf=1
hsa-miR-3607-3p	MIMAT0017985	hsa-miR-3607-3p	RELL1	RELT-like 1	-0.04	http://www.targetscan.org/cgi-bin/targetscan/vert_61/view_gene.cgi?taxid=9606&rs=NM_001085400&members=miR-3607-3p&showcnc=1&shownc=1&showncf=1
hsa-miR-3607-3p	MIMAT0017985	hsa-miR-3607-3p	NCOA3	nuclear receptor coactivator 3	-0.04	http://www.targetscan.org/cgi-bin/targetscan/vert_61/view_gene.cgi?taxid=9606&rs=NM_001174087&members=miR-3607-3p&showcnc=1&shownc=1&showncf=1
hsa-miR-3607-3p	MIMAT0017985	hsa-miR-3607-3p	DNMT3A	DNA (cytosine-5-)-methyltransferase 3 alpha	-0.04	http://www.targetscan.org/cgi-bin/targetscan/vert_61/view_gene.cgi?taxid=9606&rs=NM_022552&members=miR-3607-3p&showcnc=1&shownc=1&showncf=1
hsa-miR-3607-3p	MIMAT0017985	hsa-miR-3607-3p	TCTEX1D1	Tctex1 domain containing 1	-0.04	http://www.targetscan.org/cgi-bin/targetscan/vert_61/view_gene.cgi?taxid=9606&rs=NM_152665&members=miR-3607-3p&showcnc=1&shownc=1&showncf=1
hsa-miR-3607-3p	MIMAT0017985	hsa-miR-3607-3p	LRRC58	leucine rich repeat containing 58	-0.04	http://www.targetscan.org/cgi-bin/targetscan/vert_61/view_gene.cgi?taxid=9606&rs=NM_001099678&members=miR-3607-3p&showcnc=1&shownc=1&showncf=1
hsa-miR-3607-3p	MIMAT0017985	hsa-miR-3607-3p	SHANK3	SH3 and multiple ankyrin repeat domains 3	-0.04	http://www.targetscan.org/cgi-bin/targetscan/vert_61/view_gene.cgi?taxid=9606&rs=NM_001080420&members=miR-3607-3p&showcnc=1&shownc=1&showncf=1
hsa-miR-3607-3p	MIMAT0017985	hsa-miR-3607-3p	CTNND2	catenin (cadherin-associated protein), delta 2 (neural plakophilin-related arm-repeat protein)	-0.04	http://www.targetscan.org/cgi-bin/targetscan/vert_61/view_gene.cgi?taxid=9606&rs=NM_001332&members=miR-3607-3p&showcnc=1&shownc=1&showncf=1
hsa-miR-3607-3p	MIMAT0017985	hsa-miR-3607-3p	CHST15	carbohydrate (N-acetylgalactosamine 4-sulfate 6-O) sulfotransferase 15	-0.04	http://www.targetscan.org/cgi-bin/targetscan/vert_61/view_gene.cgi?taxid=9606&rs=NM_015892&members=miR-3607-3p&showcnc=1&shownc=1&showncf=1
hsa-miR-3607-3p	MIMAT0017985	hsa-miR-3607-3p	RNF165	ring finger protein 165	-0.04	http://www.targetscan.org/cgi-bin/targetscan/vert_61/view_gene.cgi?taxid=9606&rs=NM_152470&members=miR-3607-3p&showcnc=1&shownc=1&showncf=1
hsa-miR-3607-3p	MIMAT0017985	hsa-miR-3607-3p	NCOR1	nuclear receptor corepressor 1	>-0.04	http://www.targetscan.org/cgi-bin/targetscan/vert_61/view_gene.cgi?taxid=9606&rs=NM_001190440&members=miR-3607-3p&showcnc=1&shownc=1&showncf=1
hsa-miR-3607-3p	MIMAT0017985	hsa-miR-3607-3p	TBL1X	transducin (beta)-like 1X-linked	>-0.04	http://www.targetscan.org/cgi-bin/targetscan/vert_61/view_gene.cgi?taxid=9606&rs=NM_001139466&members=miR-3607-3p&showcnc=1&shownc=1&showncf=1
hsa-miR-3607-3p	MIMAT0017985	hsa-miR-3607-3p	KLLN	killin, p53-regulated DNA replication inhibitor	>-0.04	http://www.targetscan.org/cgi-bin/targetscan/vert_61/view_gene.cgi?taxid=9606&rs=NM_001126049&members=miR-3607-3p&showcnc=1&shownc=1&showncf=1
hsa-miR-3607-3p	MIMAT0017985	hsa-miR-3607-3p	INO80D	INO80 complex subunit D	>-0.04	http://www.targetscan.org/cgi-bin/targetscan/vert_61/view_gene.cgi?taxid=9606&rs=NM_017759&members=miR-3607-3p&showcnc=1&shownc=1&showncf=1
hsa-miR-3607-3p	MIMAT0017985	hsa-miR-3607-3p	FOXJ3	forkhead box J3	>-0.04	http://www.targetscan.org/cgi-bin/targetscan/vert_61/view_gene.cgi?taxid=9606&rs=NM_001198850&members=miR-3607-3p&showcnc=1&shownc=1&showncf=1
hsa-miR-3607-3p	MIMAT0017985	hsa-miR-3607-3p	MAP3K1	mitogen-activated protein kinase kinase kinase 1	>-0.04	http://www.targetscan.org/cgi-bin/targetscan/vert_61/view_gene.cgi?taxid=9606&rs=NM_005921&members=miR-3607-3p&showcnc=1&shownc=1&showncf=1
hsa-miR-3607-3p	MIMAT0017985	hsa-miR-3607-3p	VANGL1	vang-like 1 (van gogh, Drosophila)	>-0.04	http://www.targetscan.org/cgi-bin/targetscan/vert_61/view_gene.cgi?taxid=9606&rs=NM_001172411&members=miR-3607-3p&showcnc=1&shownc=1&showncf=1
hsa-miR-3607-3p	MIMAT0017985	hsa-miR-3607-3p	MIER3	mesoderm induction early response 1, family member 3	>-0.04	http://www.targetscan.org/cgi-bin/targetscan/vert_61/view_gene.cgi?taxid=9606&rs=NM_152622&members=miR-3607-3p&showcnc=1&shownc=1&showncf=1
hsa-miR-3607-3p	MIMAT0017985	hsa-miR-3607-3p	SARM1	sterile alpha and TIR motif containing 1	>-0.04	http://www.targetscan.org/cgi-bin/targetscan/vert_61/view_gene.cgi?taxid=9606&rs=NM_015077&members=miR-3607-3p&showcnc=1&shownc=1&showncf=1
hsa-miR-3607-3p	MIMAT0017985	hsa-miR-3607-3p	FBXL20	F-box and leucine-rich repeat protein 20	>-0.04	http://www.targetscan.org/cgi-bin/targetscan/vert_61/view_gene.cgi?taxid=9606&rs=NM_001184906&members=miR-3607-3p&showcnc=1&shownc=1&showncf=1
hsa-miR-3607-3p	MIMAT0017985	hsa-miR-3607-3p	ATG7	ATG7 autophagy related 7 homolog (S. cerevisiae)	>-0.04	http://www.targetscan.org/cgi-bin/targetscan/vert_61/view_gene.cgi?taxid=9606&rs=NM_001136031&members=miR-3607-3p&showcnc=1&shownc=1&showncf=1
hsa-miR-3607-3p	MIMAT0017985	hsa-miR-3607-3p	EDC3	enhancer of mRNA decapping 3 homolog (S. cerevisiae)	>-0.04	http://www.targetscan.org/cgi-bin/targetscan/vert_61/view_gene.cgi?taxid=9606&rs=NM_001142443&members=miR-3607-3p&showcnc=1&shownc=1&showncf=1
hsa-miR-3607-3p	MIMAT0017985	hsa-miR-3607-3p	DSEL	dermatan sulfate epimerase-like	>-0.04	http://www.targetscan.org/cgi-bin/targetscan/vert_61/view_gene.cgi?taxid=9606&rs=NM_032160&members=miR-3607-3p&showcnc=1&shownc=1&showncf=1
hsa-miR-3607-3p	MIMAT0017985	hsa-miR-3607-3p	CCNT2	cyclin T2	>-0.04	http://www.targetscan.org/cgi-bin/targetscan/vert_61/view_gene.cgi?taxid=9606&rs=NM_001241&members=miR-3607-3p&showcnc=1&shownc=1&showncf=1
hsa-miR-3607-3p	MIMAT0017985	hsa-miR-3607-3p	PTAR1	protein prenyltransferase alpha subunit repeat containing 1	>-0.04	http://www.targetscan.org/cgi-bin/targetscan/vert_61/view_gene.cgi?taxid=9606&rs=NM_001099666&members=miR-3607-3p&showcnc=1&shownc=1&showncf=1
hsa-miR-3607-3p	MIMAT0017985	hsa-miR-3607-3p	ICK	intestinal cell (MAK-like) kinase	>-0.04	http://www.targetscan.org/cgi-bin/targetscan/vert_61/view_gene.cgi?taxid=9606&rs=NM_014920&members=miR-3607-3p&showcnc=1&shownc=1&showncf=1
hsa-miR-3607-3p	MIMAT0017985	hsa-miR-3607-3p	MICAL3	microtubule associated monoxygenase, calponin and LIM domain containing 3	>-0.04	http://www.targetscan.org/cgi-bin/targetscan/vert_61/view_gene.cgi?taxid=9606&rs=NM_001136004&members=miR-3607-3p&showcnc=1&shownc=1&showncf=1
hsa-miR-3607-3p	MIMAT0017985	hsa-miR-3607-3p	SLC36A1	solute carrier family 36 (proton/amino acid symporter), member 1	>-0.04	http://www.targetscan.org/cgi-bin/targetscan/vert_61/view_gene.cgi?taxid=9606&rs=NM_078483&members=miR-3607-3p&showcnc=1&shownc=1&showncf=1
hsa-miR-3607-3p	MIMAT0017985	hsa-miR-3607-3p	CHD5	chromodomain helicase DNA binding protein 5	-0.04	http://www.targetscan.org/cgi-bin/targetscan/vert_61/view_gene.cgi?taxid=9606&rs=NM_015557&members=miR-3607-3p&showcnc=1&shownc=1&showncf=1
hsa-miR-3607-3p	MIMAT0017985	hsa-miR-3607-3p	FAM155A	family with sequence similarity 155, member A	-0.04	http://www.targetscan.org/cgi-bin/targetscan/vert_61/view_gene.cgi?taxid=9606&rs=NM_001080396&members=miR-3607-3p&showcnc=1&shownc=1&showncf=1
hsa-miR-3607-3p	MIMAT0017985	hsa-miR-3607-3p	DGKZ	diacylglycerol kinase, zeta	-0.04	http://www.targetscan.org/cgi-bin/targetscan/vert_61/view_gene.cgi?taxid=9606&rs=NM_001105540&members=miR-3607-3p&showcnc=1&shownc=1&showncf=1
hsa-miR-3607-3p	MIMAT0017985	hsa-miR-3607-3p	GK	glycerol kinase	-0.04	http://www.targetscan.org/cgi-bin/targetscan/vert_61/view_gene.cgi?taxid=9606&rs=NM_000167&members=miR-3607-3p&showcnc=1&shownc=1&showncf=1
hsa-miR-3607-3p	MIMAT0017985	hsa-miR-3607-3p	PCDH10	protocadherin 10	-0.04	http://www.targetscan.org/cgi-bin/targetscan/vert_61/view_gene.cgi?taxid=9606&rs=NM_032961&members=miR-3607-3p&showcnc=1&shownc=1&showncf=1
hsa-miR-3607-3p	MIMAT0017985	hsa-miR-3607-3p	NCOR2	nuclear receptor corepressor 2	-0.03	http://www.targetscan.org/cgi-bin/targetscan/vert_61/view_gene.cgi?taxid=9606&rs=NM_001077261&members=miR-3607-3p&showcnc=1&shownc=1&showncf=1
hsa-miR-3607-3p	MIMAT0017985	hsa-miR-3607-3p	ZNF382	zinc finger protein 382	-0.03	http://www.targetscan.org/cgi-bin/targetscan/vert_61/view_gene.cgi?taxid=9606&rs=NM_032825&members=miR-3607-3p&showcnc=1&shownc=1&showncf=1
hsa-miR-3607-3p	MIMAT0017985	hsa-miR-3607-3p	CPEB2	cytoplasmic polyadenylation element binding protein 2	-0.03	http://www.targetscan.org/cgi-bin/targetscan/vert_61/view_gene.cgi?taxid=9606&rs=NM_001177381&members=miR-3607-3p&showcnc=1&shownc=1&showncf=1
hsa-miR-3607-3p	MIMAT0017985	hsa-miR-3607-3p	STIM2	stromal interaction molecule 2	-0.03	http://www.targetscan.org/cgi-bin/targetscan/vert_61/view_gene.cgi?taxid=9606&rs=NM_001169117&members=miR-3607-3p&showcnc=1&shownc=1&showncf=1
hsa-miR-3607-3p	MIMAT0017985	hsa-miR-3607-3p	MRPS25	mitochondrial ribosomal protein S25	-0.03	http://www.targetscan.org/cgi-bin/targetscan/vert_61/view_gene.cgi?taxid=9606&rs=NM_022497&members=miR-3607-3p&showcnc=1&shownc=1&showncf=1
hsa-miR-3607-3p	MIMAT0017985	hsa-miR-3607-3p	C10orf105	chromosome 10 open reading frame 105	>-0.03	http://www.targetscan.org/cgi-bin/targetscan/vert_61/view_gene.cgi?taxid=9606&rs=NM_001164375&members=miR-3607-3p&showcnc=1&shownc=1&showncf=1
hsa-miR-3607-3p	MIMAT0017985	hsa-miR-3607-3p	SMARCD2	SWI/SNF related, matrix associated, actin dependent regulator of chromatin, subfamily d, member 2	>-0.03	http://www.targetscan.org/cgi-bin/targetscan/vert_61/view_gene.cgi?taxid=9606&rs=NM_001098426&members=miR-3607-3p&showcnc=1&shownc=1&showncf=1
hsa-miR-3607-3p	MIMAT0017985	hsa-miR-3607-3p	PLEKHA7	pleckstrin homology domain containing, family A member 7	>-0.03	http://www.targetscan.org/cgi-bin/targetscan/vert_61/view_gene.cgi?taxid=9606&rs=NM_175058&members=miR-3607-3p&showcnc=1&shownc=1&showncf=1
hsa-miR-3607-3p	MIMAT0017985	hsa-miR-3607-3p	GNG12	guanine nucleotide binding protein (G protein), gamma 12	>-0.03	http://www.targetscan.org/cgi-bin/targetscan/vert_61/view_gene.cgi?taxid=9606&rs=NM_018841&members=miR-3607-3p&showcnc=1&shownc=1&showncf=1
hsa-miR-3607-3p	MIMAT0017985	hsa-miR-3607-3p	NWD1	NACHT and WD repeat domain containing 1	>-0.03	http://www.targetscan.org/cgi-bin/targetscan/vert_61/view_gene.cgi?taxid=9606&rs=NM_001007525&members=miR-3607-3p&showcnc=1&shownc=1&showncf=1
hsa-miR-3607-3p	MIMAT0017985	hsa-miR-3607-3p	ADAM12	ADAM metallopeptidase domain 12	>-0.03	http://www.targetscan.org/cgi-bin/targetscan/vert_61/view_gene.cgi?taxid=9606&rs=NM_003474&members=miR-3607-3p&showcnc=1&shownc=1&showncf=1
hsa-miR-3607-3p	MIMAT0017985	hsa-miR-3607-3p	EML4	echinoderm microtubule associated protein like 4	>-0.03	http://www.targetscan.org/cgi-bin/targetscan/vert_61/view_gene.cgi?taxid=9606&rs=NM_001145076&members=miR-3607-3p&showcnc=1&shownc=1&showncf=1
hsa-miR-3607-3p	MIMAT0017985	hsa-miR-3607-3p	C9orf86	chromosome 9 open reading frame 86	>-0.03	http://www.targetscan.org/cgi-bin/targetscan/vert_61/view_gene.cgi?taxid=9606&rs=NM_001173988&members=miR-3607-3p&showcnc=1&shownc=1&showncf=1
hsa-miR-3607-3p	MIMAT0017985	hsa-miR-3607-3p	TMEM86A	transmembrane protein 86A	>-0.03	http://www.targetscan.org/cgi-bin/targetscan/vert_61/view_gene.cgi?taxid=9606&rs=NM_153347&members=miR-3607-3p&showcnc=1&shownc=1&showncf=1
hsa-miR-3607-3p	MIMAT0017985	hsa-miR-3607-3p	DAGLA	diacylglycerol lipase, alpha	>-0.03	http://www.targetscan.org/cgi-bin/targetscan/vert_61/view_gene.cgi?taxid=9606&rs=NM_006133&members=miR-3607-3p&showcnc=1&shownc=1&showncf=1
hsa-miR-3607-3p	MIMAT0017985	hsa-miR-3607-3p	GLUL	glutamate-ammonia ligase	>-0.03	http://www.targetscan.org/cgi-bin/targetscan/vert_61/view_gene.cgi?taxid=9606&rs=NM_001033044&members=miR-3607-3p&showcnc=1&shownc=1&showncf=1
hsa-miR-3607-3p	MIMAT0017985	hsa-miR-3607-3p	VAV3	vav 3 guanine nucleotide exchange factor	>-0.03	http://www.targetscan.org/cgi-bin/targetscan/vert_61/view_gene.cgi?taxid=9606&rs=NM_001079874&members=miR-3607-3p&showcnc=1&shownc=1&showncf=1
hsa-miR-3607-3p	MIMAT0017985	hsa-miR-3607-3p	PLAC4	placenta-specific 4	>-0.03	http://www.targetscan.org/cgi-bin/targetscan/vert_61/view_gene.cgi?taxid=9606&rs=NM_182832&members=miR-3607-3p&showcnc=1&shownc=1&showncf=1
hsa-miR-3607-3p	MIMAT0017985	hsa-miR-3607-3p	C1GALT1	core 1 synthase, glycoprotein-N-acetylgalactosamine 3-beta-galactosyltransferase, 1	>-0.03	http://www.targetscan.org/cgi-bin/targetscan/vert_61/view_gene.cgi?taxid=9606&rs=NM_020156&members=miR-3607-3p&showcnc=1&shownc=1&showncf=1
hsa-miR-3607-3p	MIMAT0017985	hsa-miR-3607-3p	PIRT	phosphoinositide-interacting regulator of transient receptor potential channels	>-0.03	http://www.targetscan.org/cgi-bin/targetscan/vert_61/view_gene.cgi?taxid=9606&rs=NM_001101387&members=miR-3607-3p&showcnc=1&shownc=1&showncf=1
hsa-miR-3607-3p	MIMAT0017985	hsa-miR-3607-3p	KHNYN	KH and NYN domain containing	>-0.03	http://www.targetscan.org/cgi-bin/targetscan/vert_61/view_gene.cgi?taxid=9606&rs=NM_015299&members=miR-3607-3p&showcnc=1&shownc=1&showncf=1
hsa-miR-3607-3p	MIMAT0017985	hsa-miR-3607-3p	EREG	epiregulin	>-0.03	http://www.targetscan.org/cgi-bin/targetscan/vert_61/view_gene.cgi?taxid=9606&rs=NM_001432&members=miR-3607-3p&showcnc=1&shownc=1&showncf=1
hsa-miR-3607-3p	MIMAT0017985	hsa-miR-3607-3p	PIK3R2	phosphoinositide-3-kinase, regulatory subunit 2 (beta)	>-0.03	http://www.targetscan.org/cgi-bin/targetscan/vert_61/view_gene.cgi?taxid=9606&rs=NM_005027&members=miR-3607-3p&showcnc=1&shownc=1&showncf=1
hsa-miR-3607-3p	MIMAT0017985	hsa-miR-3607-3p	DENND5B	DENN/MADD domain containing 5B	>-0.03	http://www.targetscan.org/cgi-bin/targetscan/vert_61/view_gene.cgi?taxid=9606&rs=NM_144973&members=miR-3607-3p&showcnc=1&shownc=1&showncf=1
hsa-miR-3607-3p	MIMAT0017985	hsa-miR-3607-3p	B3GAT1	beta-1,3-glucuronyltransferase 1 (glucuronosyltransferase P)	>-0.03	http://www.targetscan.org/cgi-bin/targetscan/vert_61/view_gene.cgi?taxid=9606&rs=NM_018644&members=miR-3607-3p&showcnc=1&shownc=1&showncf=1
hsa-miR-3607-3p	MIMAT0017985	hsa-miR-3607-3p	LDLRAP1	low density lipoprotein receptor adaptor protein 1	>-0.03	http://www.targetscan.org/cgi-bin/targetscan/vert_61/view_gene.cgi?taxid=9606&rs=NM_015627&members=miR-3607-3p&showcnc=1&shownc=1&showncf=1
hsa-miR-3607-3p	MIMAT0017985	hsa-miR-3607-3p	EGR3	early growth response 3	>-0.03	http://www.targetscan.org/cgi-bin/targetscan/vert_61/view_gene.cgi?taxid=9606&rs=NM_001199880&members=miR-3607-3p&showcnc=1&shownc=1&showncf=1
hsa-miR-3607-3p	MIMAT0017985	hsa-miR-3607-3p	PLCB3	phospholipase C, beta 3 (phosphatidylinositol-specific)	>-0.03	http://www.targetscan.org/cgi-bin/targetscan/vert_61/view_gene.cgi?taxid=9606&rs=NM_000932&members=miR-3607-3p&showcnc=1&shownc=1&showncf=1
hsa-miR-3607-3p	MIMAT0017985	hsa-miR-3607-3p	ABHD5	abhydrolase domain containing 5	>-0.03	http://www.targetscan.org/cgi-bin/targetscan/vert_61/view_gene.cgi?taxid=9606&rs=NM_016006&members=miR-3607-3p&showcnc=1&shownc=1&showncf=1
hsa-miR-3607-3p	MIMAT0017985	hsa-miR-3607-3p	GDNF	glial cell derived neurotrophic factor	>-0.03	http://www.targetscan.org/cgi-bin/targetscan/vert_61/view_gene.cgi?taxid=9606&rs=NM_000514&members=miR-3607-3p&showcnc=1&shownc=1&showncf=1
hsa-miR-3607-3p	MIMAT0017985	hsa-miR-3607-3p	UBE2J1	ubiquitin-conjugating enzyme E2, J1, U	>-0.03	http://www.targetscan.org/cgi-bin/targetscan/vert_61/view_gene.cgi?taxid=9606&rs=NM_016021&members=miR-3607-3p&showcnc=1&shownc=1&showncf=1
hsa-miR-3607-3p	MIMAT0017985	hsa-miR-3607-3p	TRPM7	transient receptor potential cation channel, subfamily M, member 7	>-0.03	http://www.targetscan.org/cgi-bin/targetscan/vert_61/view_gene.cgi?taxid=9606&rs=NM_017672&members=miR-3607-3p&showcnc=1&shownc=1&showncf=1
hsa-miR-3607-3p	MIMAT0017985	hsa-miR-3607-3p	MYOZ3	myozenin 3	>-0.03	http://www.targetscan.org/cgi-bin/targetscan/vert_61/view_gene.cgi?taxid=9606&rs=NM_001122853&members=miR-3607-3p&showcnc=1&shownc=1&showncf=1
hsa-miR-3607-3p	MIMAT0017985	hsa-miR-3607-3p	MYO5A	myosin VA (heavy chain 12, myoxin)	>-0.03	http://www.targetscan.org/cgi-bin/targetscan/vert_61/view_gene.cgi?taxid=9606&rs=NM_000259&members=miR-3607-3p&showcnc=1&shownc=1&showncf=1
hsa-miR-3607-3p	MIMAT0017985	hsa-miR-3607-3p	BEND3	BEN domain containing 3	>-0.03	http://www.targetscan.org/cgi-bin/targetscan/vert_61/view_gene.cgi?taxid=9606&rs=NM_001080450&members=miR-3607-3p&showcnc=1&shownc=1&showncf=1
hsa-miR-3607-3p	MIMAT0017985	hsa-miR-3607-3p	FOXK2	forkhead box K2	>-0.03	http://www.targetscan.org/cgi-bin/targetscan/vert_61/view_gene.cgi?taxid=9606&rs=NM_004514&members=miR-3607-3p&showcnc=1&shownc=1&showncf=1
hsa-miR-3607-3p	MIMAT0017985	hsa-miR-3607-3p	MECP2	methyl CpG binding protein 2 (Rett syndrome)	>-0.03	http://www.targetscan.org/cgi-bin/targetscan/vert_61/view_gene.cgi?taxid=9606&rs=NM_004992&members=miR-3607-3p&showcnc=1&shownc=1&showncf=1
hsa-miR-3607-3p	MIMAT0017985	hsa-miR-3607-3p	WNT7B	wingless-type MMTV integration site family, member 7B	>-0.03	http://www.targetscan.org/cgi-bin/targetscan/vert_61/view_gene.cgi?taxid=9606&rs=NM_058238&members=miR-3607-3p&showcnc=1&shownc=1&showncf=1
hsa-miR-3607-3p	MIMAT0017985	hsa-miR-3607-3p	MPZL1	myelin protein zero-like 1	>-0.03	http://www.targetscan.org/cgi-bin/targetscan/vert_61/view_gene.cgi?taxid=9606&rs=NM_001146191&members=miR-3607-3p&showcnc=1&shownc=1&showncf=1
hsa-miR-3607-3p	MIMAT0017985	hsa-miR-3607-3p	EPM2AIP1	EPM2A (laforin) interacting protein 1	>-0.03	http://www.targetscan.org/cgi-bin/targetscan/vert_61/view_gene.cgi?taxid=9606&rs=NM_014805&members=miR-3607-3p&showcnc=1&shownc=1&showncf=1
hsa-miR-3607-3p	MIMAT0017985	hsa-miR-3607-3p	RAB14	RAB14, member RAS oncogene family	>-0.03	http://www.targetscan.org/cgi-bin/targetscan/vert_61/view_gene.cgi?taxid=9606&rs=NM_016322&members=miR-3607-3p&showcnc=1&shownc=1&showncf=1
hsa-miR-3607-3p	MIMAT0017985	hsa-miR-3607-3p	TTYH3	tweety homolog 3 (Drosophila)	>-0.03	http://www.targetscan.org/cgi-bin/targetscan/vert_61/view_gene.cgi?taxid=9606&rs=NM_025250&members=miR-3607-3p&showcnc=1&shownc=1&showncf=1
hsa-miR-3607-3p	MIMAT0017985	hsa-miR-3607-3p	SNX18	sorting nexin 18	>-0.03	http://www.targetscan.org/cgi-bin/targetscan/vert_61/view_gene.cgi?taxid=9606&rs=NM_001102575&members=miR-3607-3p&showcnc=1&shownc=1&showncf=1
hsa-miR-3607-3p	MIMAT0017985	hsa-miR-3607-3p	SYT2	synaptotagmin II	>-0.03	http://www.targetscan.org/cgi-bin/targetscan/vert_61/view_gene.cgi?taxid=9606&rs=NM_001136504&members=miR-3607-3p&showcnc=1&shownc=1&showncf=1
hsa-miR-3607-3p	MIMAT0017985	hsa-miR-3607-3p	LRRC55	leucine rich repeat containing 55	>-0.03	http://www.targetscan.org/cgi-bin/targetscan/vert_61/view_gene.cgi?taxid=9606&rs=NM_001005210&members=miR-3607-3p&showcnc=1&shownc=1&showncf=1
hsa-miR-3607-3p	MIMAT0017985	hsa-miR-3607-3p	SCAI	suppressor of cancer cell invasion	>-0.03	http://www.targetscan.org/cgi-bin/targetscan/vert_61/view_gene.cgi?taxid=9606&rs=NM_001144877&members=miR-3607-3p&showcnc=1&shownc=1&showncf=1
hsa-miR-3607-3p	MIMAT0017985	hsa-miR-3607-3p	BCL2L15	BCL2-like 15	>-0.03	http://www.targetscan.org/cgi-bin/targetscan/vert_61/view_gene.cgi?taxid=9606&rs=NM_001010922&members=miR-3607-3p&showcnc=1&shownc=1&showncf=1
hsa-miR-3607-3p	MIMAT0017985	hsa-miR-3607-3p	PPP3CA	protein phosphatase 3, catalytic subunit, alpha isozyme	>-0.03	http://www.targetscan.org/cgi-bin/targetscan/vert_61/view_gene.cgi?taxid=9606&rs=NM_000944&members=miR-3607-3p&showcnc=1&shownc=1&showncf=1
hsa-miR-3607-3p	MIMAT0017985	hsa-miR-3607-3p	RRM2B	ribonucleotide reductase M2 B (TP53 inducible)	>-0.03	http://www.targetscan.org/cgi-bin/targetscan/vert_61/view_gene.cgi?taxid=9606&rs=NM_001172477&members=miR-3607-3p&showcnc=1&shownc=1&showncf=1
hsa-miR-3607-3p	MIMAT0017985	hsa-miR-3607-3p	AFF3	AF4/FMR2 family, member 3	>-0.03	http://www.targetscan.org/cgi-bin/targetscan/vert_61/view_gene.cgi?taxid=9606&rs=NM_001025108&members=miR-3607-3p&showcnc=1&shownc=1&showncf=1
hsa-miR-3607-3p	MIMAT0017985	hsa-miR-3607-3p	C14orf43	chromosome 14 open reading frame 43	>-0.03	http://www.targetscan.org/cgi-bin/targetscan/vert_61/view_gene.cgi?taxid=9606&rs=NM_001043318&members=miR-3607-3p&showcnc=1&shownc=1&showncf=1
hsa-miR-3607-3p	MIMAT0017985	hsa-miR-3607-3p	ZNF652	zinc finger protein 652	>-0.03	http://www.targetscan.org/cgi-bin/targetscan/vert_61/view_gene.cgi?taxid=9606&rs=NM_001145365&members=miR-3607-3p&showcnc=1&shownc=1&showncf=1
hsa-miR-3607-3p	MIMAT0017985	hsa-miR-3607-3p	ACTR1A	ARP1 actin-related protein 1 homolog A, centractin alpha (yeast)	>-0.03	http://www.targetscan.org/cgi-bin/targetscan/vert_61/view_gene.cgi?taxid=9606&rs=NM_005736&members=miR-3607-3p&showcnc=1&shownc=1&showncf=1
hsa-miR-3607-3p	MIMAT0017985	hsa-miR-3607-3p	ZFYVE20	zinc finger, FYVE domain containing 20	>-0.03	http://www.targetscan.org/cgi-bin/targetscan/vert_61/view_gene.cgi?taxid=9606&rs=NM_022340&members=miR-3607-3p&showcnc=1&shownc=1&showncf=1
hsa-miR-3607-3p	MIMAT0017985	hsa-miR-3607-3p	BCL11A	B-cell CLL/lymphoma 11A (zinc finger protein)	>-0.03	http://www.targetscan.org/cgi-bin/targetscan/vert_61/view_gene.cgi?taxid=9606&rs=NM_022893&members=miR-3607-3p&showcnc=1&shownc=1&showncf=1
hsa-miR-3607-3p	MIMAT0017985	hsa-miR-3607-3p	PRELP	proline/arginine-rich end leucine-rich repeat protein	>-0.03	http://www.targetscan.org/cgi-bin/targetscan/vert_61/view_gene.cgi?taxid=9606&rs=NM_002725&members=miR-3607-3p&showcnc=1&shownc=1&showncf=1
hsa-miR-3607-3p	MIMAT0017985	hsa-miR-3607-3p	ZNF516	zinc finger protein 516	>-0.03	http://www.targetscan.org/cgi-bin/targetscan/vert_61/view_gene.cgi?taxid=9606&rs=NM_014643&members=miR-3607-3p&showcnc=1&shownc=1&showncf=1
hsa-miR-3607-3p	MIMAT0017985	hsa-miR-3607-3p	FAM124A	family with sequence similarity 124A	>-0.03	http://www.targetscan.org/cgi-bin/targetscan/vert_61/view_gene.cgi?taxid=9606&rs=NM_001242312&members=miR-3607-3p&showcnc=1&shownc=1&showncf=1
hsa-miR-3607-3p	MIMAT0017985	hsa-miR-3607-3p	KIF1B	kinesin family member 1B	>-0.03	http://www.targetscan.org/cgi-bin/targetscan/vert_61/view_gene.cgi?taxid=9606&rs=NM_015074&members=miR-3607-3p&showcnc=1&shownc=1&showncf=1
hsa-miR-3607-3p	MIMAT0017985	hsa-miR-3607-3p	SOBP	sine oculis binding protein homolog (Drosophila)	>-0.03	http://www.targetscan.org/cgi-bin/targetscan/vert_61/view_gene.cgi?taxid=9606&rs=NM_018013&members=miR-3607-3p&showcnc=1&shownc=1&showncf=1
hsa-miR-3607-3p	MIMAT0017985	hsa-miR-3607-3p	GRIP2	glutamate receptor interacting protein 2	>-0.03	http://www.targetscan.org/cgi-bin/targetscan/vert_61/view_gene.cgi?taxid=9606&rs=NM_001080423&members=miR-3607-3p&showcnc=1&shownc=1&showncf=1
hsa-miR-3607-3p	MIMAT0017985	hsa-miR-3607-3p	SGIP1	SH3-domain GRB2-like (endophilin) interacting protein 1	-0.03	http://www.targetscan.org/cgi-bin/targetscan/vert_61/view_gene.cgi?taxid=9606&rs=NM_032291&members=miR-3607-3p&showcnc=1&shownc=1&showncf=1
hsa-miR-3607-3p	MIMAT0017985	hsa-miR-3607-3p	EDA	ectodysplasin A	-0.02	http://www.targetscan.org/cgi-bin/targetscan/vert_61/view_gene.cgi?taxid=9606&rs=NM_001005609&members=miR-3607-3p&showcnc=1&shownc=1&showncf=1
hsa-miR-3607-3p	MIMAT0017985	hsa-miR-3607-3p	CDC7	cell division cycle 7 homolog (S. cerevisiae)	-0.02	http://www.targetscan.org/cgi-bin/targetscan/vert_61/view_gene.cgi?taxid=9606&rs=NM_001134419&members=miR-3607-3p&showcnc=1&shownc=1&showncf=1
hsa-miR-3607-3p	MIMAT0017985	hsa-miR-3607-3p	DCC	deleted in colorectal carcinoma	-0.02	http://www.targetscan.org/cgi-bin/targetscan/vert_61/view_gene.cgi?taxid=9606&rs=NM_005215&members=miR-3607-3p&showcnc=1&shownc=1&showncf=1
hsa-miR-3607-3p	MIMAT0017985	hsa-miR-3607-3p	DDIT4	DNA-damage-inducible transcript 4	-0.02	http://www.targetscan.org/cgi-bin/targetscan/vert_61/view_gene.cgi?taxid=9606&rs=NM_019058&members=miR-3607-3p&showcnc=1&shownc=1&showncf=1
hsa-miR-3607-3p	MIMAT0017985	hsa-miR-3607-3p	SLC29A2	solute carrier family 29 (nucleoside transporters), member 2	-0.02	http://www.targetscan.org/cgi-bin/targetscan/vert_61/view_gene.cgi?taxid=9606&rs=NM_001532&members=miR-3607-3p&showcnc=1&shownc=1&showncf=1
hsa-miR-3607-3p	MIMAT0017985	hsa-miR-3607-3p	ATG5	ATG5 autophagy related 5 homolog (S. cerevisiae)	-0.02	http://www.targetscan.org/cgi-bin/targetscan/vert_61/view_gene.cgi?taxid=9606&rs=NM_004849&members=miR-3607-3p&showcnc=1&shownc=1&showncf=1
hsa-miR-3607-3p	MIMAT0017985	hsa-miR-3607-3p	CREBZF	CREB/ATF bZIP transcription factor	-0.02	http://www.targetscan.org/cgi-bin/targetscan/vert_61/view_gene.cgi?taxid=9606&rs=NM_001039618&members=miR-3607-3p&showcnc=1&shownc=1&showncf=1
hsa-miR-3607-3p	MIMAT0017985	hsa-miR-3607-3p	EPB41L4B	erythrocyte membrane protein band 4.1 like 4B	>-0.02	http://www.targetscan.org/cgi-bin/targetscan/vert_61/view_gene.cgi?taxid=9606&rs=NM_018424&members=miR-3607-3p&showcnc=1&shownc=1&showncf=1
hsa-miR-3607-3p	MIMAT0017985	hsa-miR-3607-3p	PRRT2	proline-rich transmembrane protein 2	>-0.02	http://www.targetscan.org/cgi-bin/targetscan/vert_61/view_gene.cgi?taxid=9606&rs=NM_145239&members=miR-3607-3p&showcnc=1&shownc=1&showncf=1
hsa-miR-3607-3p	MIMAT0017985	hsa-miR-3607-3p	ZNF618	zinc finger protein 618	>-0.02	http://www.targetscan.org/cgi-bin/targetscan/vert_61/view_gene.cgi?taxid=9606&rs=NM_133374&members=miR-3607-3p&showcnc=1&shownc=1&showncf=1
hsa-miR-3607-3p	MIMAT0017985	hsa-miR-3607-3p	MARCH4	membrane-associated ring finger (C3HC4) 4	>-0.02	http://www.targetscan.org/cgi-bin/targetscan/vert_61/view_gene.cgi?taxid=9606&rs=NM_020814&members=miR-3607-3p&showcnc=1&shownc=1&showncf=1
hsa-miR-3607-3p	MIMAT0017985	hsa-miR-3607-3p	HNRNPC	heterogeneous nuclear ribonucleoprotein C (C1/C2)	>-0.02	http://www.targetscan.org/cgi-bin/targetscan/vert_61/view_gene.cgi?taxid=9606&rs=NM_001077442&members=miR-3607-3p&showcnc=1&shownc=1&showncf=1
hsa-miR-3607-3p	MIMAT0017985	hsa-miR-3607-3p	EFR3A	EFR3 homolog A (S. cerevisiae)	>-0.02	http://www.targetscan.org/cgi-bin/targetscan/vert_61/view_gene.cgi?taxid=9606&rs=NM_015137&members=miR-3607-3p&showcnc=1&shownc=1&showncf=1
hsa-miR-3607-3p	MIMAT0017985	hsa-miR-3607-3p	MYBL2	v-myb myeloblastosis viral oncogene homolog (avian)-like 2	>-0.02	http://www.targetscan.org/cgi-bin/targetscan/vert_61/view_gene.cgi?taxid=9606&rs=NM_002466&members=miR-3607-3p&showcnc=1&shownc=1&showncf=1
hsa-miR-3607-3p	MIMAT0017985	hsa-miR-3607-3p	CELF3	CUGBP, Elav-like family member 3	>-0.02	http://www.targetscan.org/cgi-bin/targetscan/vert_61/view_gene.cgi?taxid=9606&rs=NM_001172648&members=miR-3607-3p&showcnc=1&shownc=1&showncf=1
hsa-miR-3607-3p	MIMAT0017985	hsa-miR-3607-3p	DPY19L3	dpy-19-like 3 (C. elegans)	>-0.02	http://www.targetscan.org/cgi-bin/targetscan/vert_61/view_gene.cgi?taxid=9606&rs=NM_001172774&members=miR-3607-3p&showcnc=1&shownc=1&showncf=1
hsa-miR-3607-3p	MIMAT0017985	hsa-miR-3607-3p	CHFR	checkpoint with forkhead and ring finger domains	>-0.02	http://www.targetscan.org/cgi-bin/targetscan/vert_61/view_gene.cgi?taxid=9606&rs=NM_001161344&members=miR-3607-3p&showcnc=1&shownc=1&showncf=1
hsa-miR-3607-3p	MIMAT0017985	hsa-miR-3607-3p	SLC2A12	solute carrier family 2 (facilitated glucose transporter), member 12	>-0.02	http://www.targetscan.org/cgi-bin/targetscan/vert_61/view_gene.cgi?taxid=9606&rs=NM_145176&members=miR-3607-3p&showcnc=1&shownc=1&showncf=1
hsa-miR-3607-3p	MIMAT0017985	hsa-miR-3607-3p	HOXA11	homeobox A11	>-0.02	http://www.targetscan.org/cgi-bin/targetscan/vert_61/view_gene.cgi?taxid=9606&rs=NM_005523&members=miR-3607-3p&showcnc=1&shownc=1&showncf=1
hsa-miR-3607-3p	MIMAT0017985	hsa-miR-3607-3p	ZNRF1	zinc and ring finger 1	>-0.02	http://www.targetscan.org/cgi-bin/targetscan/vert_61/view_gene.cgi?taxid=9606&rs=NM_032268&members=miR-3607-3p&showcnc=1&shownc=1&showncf=1
hsa-miR-3607-3p	MIMAT0017985	hsa-miR-3607-3p	FBXO34	F-box protein 34	>-0.02	http://www.targetscan.org/cgi-bin/targetscan/vert_61/view_gene.cgi?taxid=9606&rs=NM_017943&members=miR-3607-3p&showcnc=1&shownc=1&showncf=1
hsa-miR-3607-3p	MIMAT0017985	hsa-miR-3607-3p	MAF	v-maf musculoaponeurotic fibrosarcoma oncogene homolog (avian)	>-0.02	http://www.targetscan.org/cgi-bin/targetscan/vert_61/view_gene.cgi?taxid=9606&rs=NM_001031804&members=miR-3607-3p&showcnc=1&shownc=1&showncf=1
hsa-miR-3607-3p	MIMAT0017985	hsa-miR-3607-3p	GRAMD4	GRAM domain containing 4	>-0.02	http://www.targetscan.org/cgi-bin/targetscan/vert_61/view_gene.cgi?taxid=9606&rs=NM_015124&members=miR-3607-3p&showcnc=1&shownc=1&showncf=1
hsa-miR-3607-3p	MIMAT0017985	hsa-miR-3607-3p	RCOR1	REST corepressor 1	>-0.02	http://www.targetscan.org/cgi-bin/targetscan/vert_61/view_gene.cgi?taxid=9606&rs=NM_015156&members=miR-3607-3p&showcnc=1&shownc=1&showncf=1
hsa-miR-3607-3p	MIMAT0017985	hsa-miR-3607-3p	NEURL1B	neuralized homolog 1B (Drosophila)	>-0.02	http://www.targetscan.org/cgi-bin/targetscan/vert_61/view_gene.cgi?taxid=9606&rs=NM_001142651&members=miR-3607-3p&showcnc=1&shownc=1&showncf=1
hsa-miR-3607-3p	MIMAT0017985	hsa-miR-3607-3p	RTN4R	reticulon 4 receptor	>-0.02	http://www.targetscan.org/cgi-bin/targetscan/vert_61/view_gene.cgi?taxid=9606&rs=NM_023004&members=miR-3607-3p&showcnc=1&shownc=1&showncf=1
hsa-miR-3607-3p	MIMAT0017985	hsa-miR-3607-3p	PPTC7	PTC7 protein phosphatase homolog (S. cerevisiae)	>-0.02	http://www.targetscan.org/cgi-bin/targetscan/vert_61/view_gene.cgi?taxid=9606&rs=NM_139283&members=miR-3607-3p&showcnc=1&shownc=1&showncf=1
hsa-miR-3607-3p	MIMAT0017985	hsa-miR-3607-3p	DPYSL2	dihydropyrimidinase-like 2	>-0.02	http://www.targetscan.org/cgi-bin/targetscan/vert_61/view_gene.cgi?taxid=9606&rs=NM_001197293&members=miR-3607-3p&showcnc=1&shownc=1&showncf=1
hsa-miR-3607-3p	MIMAT0017985	hsa-miR-3607-3p	TNXB	tenascin XB	>-0.02	http://www.targetscan.org/cgi-bin/targetscan/vert_61/view_gene.cgi?taxid=9606&rs=NM_019105&members=miR-3607-3p&showcnc=1&shownc=1&showncf=1
hsa-miR-3607-3p	MIMAT0017985	hsa-miR-3607-3p	SNX27	sorting nexin family member 27	>-0.02	http://www.targetscan.org/cgi-bin/targetscan/vert_61/view_gene.cgi?taxid=9606&rs=NM_030918&members=miR-3607-3p&showcnc=1&shownc=1&showncf=1
hsa-miR-3607-3p	MIMAT0017985	hsa-miR-3607-3p	PJA2	praja ring finger 2	>-0.02	http://www.targetscan.org/cgi-bin/targetscan/vert_61/view_gene.cgi?taxid=9606&rs=NM_014819&members=miR-3607-3p&showcnc=1&shownc=1&showncf=1
hsa-miR-3607-3p	MIMAT0017985	hsa-miR-3607-3p	FBRS	fibrosin	>-0.02	http://www.targetscan.org/cgi-bin/targetscan/vert_61/view_gene.cgi?taxid=9606&rs=NM_001105079&members=miR-3607-3p&showcnc=1&shownc=1&showncf=1
hsa-miR-3607-3p	MIMAT0017985	hsa-miR-3607-3p	MNT	MAX binding protein	>-0.02	http://www.targetscan.org/cgi-bin/targetscan/vert_61/view_gene.cgi?taxid=9606&rs=NM_020310&members=miR-3607-3p&showcnc=1&shownc=1&showncf=1
hsa-miR-3607-3p	MIMAT0017985	hsa-miR-3607-3p	ZNF507	zinc finger protein 507	>-0.02	http://www.targetscan.org/cgi-bin/targetscan/vert_61/view_gene.cgi?taxid=9606&rs=NM_001136156&members=miR-3607-3p&showcnc=1&shownc=1&showncf=1
hsa-miR-3607-3p	MIMAT0017985	hsa-miR-3607-3p	GLI2	GLI family zinc finger 2	>-0.02	http://www.targetscan.org/cgi-bin/targetscan/vert_61/view_gene.cgi?taxid=9606&rs=NM_005270&members=miR-3607-3p&showcnc=1&shownc=1&showncf=1
hsa-miR-3607-3p	MIMAT0017985	hsa-miR-3607-3p	TET3	tet oncogene family member 3	>-0.02	http://www.targetscan.org/cgi-bin/targetscan/vert_61/view_gene.cgi?taxid=9606&rs=NM_144993&members=miR-3607-3p&showcnc=1&shownc=1&showncf=1
hsa-miR-3607-3p	MIMAT0017985	hsa-miR-3607-3p	PREPL	prolyl endopeptidase-like	>-0.02	http://www.targetscan.org/cgi-bin/targetscan/vert_61/view_gene.cgi?taxid=9606&rs=NM_001042385&members=miR-3607-3p&showcnc=1&shownc=1&showncf=1
hsa-miR-3607-3p	MIMAT0017985	hsa-miR-3607-3p	TAB3	TGF-beta activated kinase 1/MAP3K7 binding protein 3	>-0.02	http://www.targetscan.org/cgi-bin/targetscan/vert_61/view_gene.cgi?taxid=9606&rs=NM_152787&members=miR-3607-3p&showcnc=1&shownc=1&showncf=1
hsa-miR-3607-3p	MIMAT0017985	hsa-miR-3607-3p	OAZ2	ornithine decarboxylase antizyme 2	>-0.02	http://www.targetscan.org/cgi-bin/targetscan/vert_61/view_gene.cgi?taxid=9606&rs=NM_002537&members=miR-3607-3p&showcnc=1&shownc=1&showncf=1
hsa-miR-3607-3p	MIMAT0017985	hsa-miR-3607-3p	SNX6	sorting nexin 6	>-0.02	http://www.targetscan.org/cgi-bin/targetscan/vert_61/view_gene.cgi?taxid=9606&rs=NM_021249&members=miR-3607-3p&showcnc=1&shownc=1&showncf=1
hsa-miR-3607-3p	MIMAT0017985	hsa-miR-3607-3p	DOLPP1	dolichyl pyrophosphate phosphatase 1	>-0.02	http://www.targetscan.org/cgi-bin/targetscan/vert_61/view_gene.cgi?taxid=9606&rs=NM_001135917&members=miR-3607-3p&showcnc=1&shownc=1&showncf=1
hsa-miR-3607-3p	MIMAT0017985	hsa-miR-3607-3p	FAM123B	family with sequence similarity 123B	>-0.02	http://www.targetscan.org/cgi-bin/targetscan/vert_61/view_gene.cgi?taxid=9606&rs=NM_152424&members=miR-3607-3p&showcnc=1&shownc=1&showncf=1
hsa-miR-3607-3p	MIMAT0017985	hsa-miR-3607-3p	GNAI2	guanine nucleotide binding protein (G protein), alpha inhibiting activity polypeptide 2	>-0.02	http://www.targetscan.org/cgi-bin/targetscan/vert_61/view_gene.cgi?taxid=9606&rs=NM_001166425&members=miR-3607-3p&showcnc=1&shownc=1&showncf=1
hsa-miR-3607-3p	MIMAT0017985	hsa-miR-3607-3p	CUX1	cut-like homeobox 1	>-0.02	http://www.targetscan.org/cgi-bin/targetscan/vert_61/view_gene.cgi?taxid=9606&rs=NM_001202543&members=miR-3607-3p&showcnc=1&shownc=1&showncf=1
hsa-miR-3607-3p	MIMAT0017985	hsa-miR-3607-3p	EFNA3	ephrin-A3	>-0.02	http://www.targetscan.org/cgi-bin/targetscan/vert_61/view_gene.cgi?taxid=9606&rs=NM_004952&members=miR-3607-3p&showcnc=1&shownc=1&showncf=1
hsa-miR-3607-3p	MIMAT0017985	hsa-miR-3607-3p	KCTD10	potassium channel tetramerisation domain containing 10	>-0.02	http://www.targetscan.org/cgi-bin/targetscan/vert_61/view_gene.cgi?taxid=9606&rs=NM_031954&members=miR-3607-3p&showcnc=1&shownc=1&showncf=1
hsa-miR-3607-3p	MIMAT0017985	hsa-miR-3607-3p	FOXP4	forkhead box P4	>-0.02	http://www.targetscan.org/cgi-bin/targetscan/vert_61/view_gene.cgi?taxid=9606&rs=NM_001012426&members=miR-3607-3p&showcnc=1&shownc=1&showncf=1
hsa-miR-3607-3p	MIMAT0017985	hsa-miR-3607-3p	EPHB2	EPH receptor B2	>-0.02	http://www.targetscan.org/cgi-bin/targetscan/vert_61/view_gene.cgi?taxid=9606&rs=NM_004442&members=miR-3607-3p&showcnc=1&shownc=1&showncf=1
hsa-miR-3607-3p	MIMAT0017985	hsa-miR-3607-3p	MAP1B	microtubule-associated protein 1B	>-0.02	http://www.targetscan.org/cgi-bin/targetscan/vert_61/view_gene.cgi?taxid=9606&rs=NM_005909&members=miR-3607-3p&showcnc=1&shownc=1&showncf=1
hsa-miR-3607-3p	MIMAT0017985	hsa-miR-3607-3p	KIAA1949	KIAA1949	>-0.02	http://www.targetscan.org/cgi-bin/targetscan/vert_61/view_gene.cgi?taxid=9606&rs=NM_001134870&members=miR-3607-3p&showcnc=1&shownc=1&showncf=1
hsa-miR-3607-3p	MIMAT0017985	hsa-miR-3607-3p	KCTD7	potassium channel tetramerisation domain containing 7	>-0.02	http://www.targetscan.org/cgi-bin/targetscan/vert_61/view_gene.cgi?taxid=9606&rs=NM_153033&members=miR-3607-3p&showcnc=1&shownc=1&showncf=1
hsa-miR-3607-3p	MIMAT0017985	hsa-miR-3607-3p	AGPAT5	1-acylglycerol-3-phosphate O-acyltransferase 5 (lysophosphatidic acid acyltransferase, epsilon)	>-0.02	http://www.targetscan.org/cgi-bin/targetscan/vert_61/view_gene.cgi?taxid=9606&rs=NM_018361&members=miR-3607-3p&showcnc=1&shownc=1&showncf=1
hsa-miR-3607-3p	MIMAT0017985	hsa-miR-3607-3p	MID1	midline 1 (Opitz/BBB syndrome)	>-0.02	http://www.targetscan.org/cgi-bin/targetscan/vert_61/view_gene.cgi?taxid=9606&rs=NM_000381&members=miR-3607-3p&showcnc=1&shownc=1&showncf=1
hsa-miR-3607-3p	MIMAT0017985	hsa-miR-3607-3p	MLL	myeloid/lymphoid or mixed-lineage leukemia (trithorax homolog, Drosophila)	>-0.02	http://www.targetscan.org/cgi-bin/targetscan/vert_61/view_gene.cgi?taxid=9606&rs=NM_001197104&members=miR-3607-3p&showcnc=1&shownc=1&showncf=1
hsa-miR-3607-3p	MIMAT0017985	hsa-miR-3607-3p	KCNA6	potassium voltage-gated channel, shaker-related subfamily, member 6	>-0.02	http://www.targetscan.org/cgi-bin/targetscan/vert_61/view_gene.cgi?taxid=9606&rs=NM_002235&members=miR-3607-3p&showcnc=1&shownc=1&showncf=1
hsa-miR-3607-3p	MIMAT0017985	hsa-miR-3607-3p	NF1	neurofibromin 1	>-0.02	http://www.targetscan.org/cgi-bin/targetscan/vert_61/view_gene.cgi?taxid=9606&rs=NM_000267&members=miR-3607-3p&showcnc=1&shownc=1&showncf=1
hsa-miR-3607-3p	MIMAT0017985	hsa-miR-3607-3p	PITX1	paired-like homeodomain 1	>-0.02	http://www.targetscan.org/cgi-bin/targetscan/vert_61/view_gene.cgi?taxid=9606&rs=NM_002653&members=miR-3607-3p&showcnc=1&shownc=1&showncf=1
hsa-miR-3607-3p	MIMAT0017985	hsa-miR-3607-3p	SBF1	SET binding factor 1	>-0.02	http://www.targetscan.org/cgi-bin/targetscan/vert_61/view_gene.cgi?taxid=9606&rs=NM_002972&members=miR-3607-3p&showcnc=1&shownc=1&showncf=1
hsa-miR-3607-3p	MIMAT0017985	hsa-miR-3607-3p	CORO2A	coronin, actin binding protein, 2A	>-0.02	http://www.targetscan.org/cgi-bin/targetscan/vert_61/view_gene.cgi?taxid=9606&rs=NM_003389&members=miR-3607-3p&showcnc=1&shownc=1&showncf=1
hsa-miR-3607-3p	MIMAT0017985	hsa-miR-3607-3p	SLC4A7	solute carrier family 4, sodium bicarbonate cotransporter, member 7	>-0.02	http://www.targetscan.org/cgi-bin/targetscan/vert_61/view_gene.cgi?taxid=9606&rs=NM_003615&members=miR-3607-3p&showcnc=1&shownc=1&showncf=1
hsa-miR-3607-3p	MIMAT0017985	hsa-miR-3607-3p	MLXIP	MLX interacting protein	>-0.02	http://www.targetscan.org/cgi-bin/targetscan/vert_61/view_gene.cgi?taxid=9606&rs=NM_014938&members=miR-3607-3p&showcnc=1&shownc=1&showncf=1
hsa-miR-3607-3p	MIMAT0017985	hsa-miR-3607-3p	KDM6B	lysine (K)-specific demethylase 6B	>-0.02	http://www.targetscan.org/cgi-bin/targetscan/vert_61/view_gene.cgi?taxid=9606&rs=NM_001080424&members=miR-3607-3p&showcnc=1&shownc=1&showncf=1
hsa-miR-3607-3p	MIMAT0017985	hsa-miR-3607-3p	ATP11A	ATPase, class VI, type 11A	>-0.02	http://www.targetscan.org/cgi-bin/targetscan/vert_61/view_gene.cgi?taxid=9606&rs=NM_015205&members=miR-3607-3p&showcnc=1&shownc=1&showncf=1
hsa-miR-3607-3p	MIMAT0017985	hsa-miR-3607-3p	FLVCR1	feline leukemia virus subgroup C cellular receptor 1	>-0.02	http://www.targetscan.org/cgi-bin/targetscan/vert_61/view_gene.cgi?taxid=9606&rs=NM_014053&members=miR-3607-3p&showcnc=1&shownc=1&showncf=1
hsa-miR-3607-3p	MIMAT0017985	hsa-miR-3607-3p	BACH2	BTB and CNC homology 1, basic leucine zipper transcription factor 2	>-0.02	http://www.targetscan.org/cgi-bin/targetscan/vert_61/view_gene.cgi?taxid=9606&rs=NM_001170794&members=miR-3607-3p&showcnc=1&shownc=1&showncf=1
hsa-miR-3607-3p	MIMAT0017985	hsa-miR-3607-3p	BCL11B	B-cell CLL/lymphoma 11B (zinc finger protein)	>-0.02	http://www.targetscan.org/cgi-bin/targetscan/vert_61/view_gene.cgi?taxid=9606&rs=NM_022898&members=miR-3607-3p&showcnc=1&shownc=1&showncf=1
hsa-miR-3607-3p	MIMAT0017985	hsa-miR-3607-3p	WNK3	WNK lysine deficient protein kinase 3	>-0.02	http://www.targetscan.org/cgi-bin/targetscan/vert_61/view_gene.cgi?taxid=9606&rs=NM_001002838&members=miR-3607-3p&showcnc=1&shownc=1&showncf=1
hsa-miR-3607-3p	MIMAT0017985	hsa-miR-3607-3p	DCTN5	dynactin 5 (p25)	>-0.02	http://www.targetscan.org/cgi-bin/targetscan/vert_61/view_gene.cgi?taxid=9606&rs=NM_001199743&members=miR-3607-3p&showcnc=1&shownc=1&showncf=1
hsa-miR-3607-3p	MIMAT0017985	hsa-miR-3607-3p	STK35	serine/threonine kinase 35	>-0.02	http://www.targetscan.org/cgi-bin/targetscan/vert_61/view_gene.cgi?taxid=9606&rs=NM_080836&members=miR-3607-3p&showcnc=1&shownc=1&showncf=1
hsa-miR-3607-3p	MIMAT0017985	hsa-miR-3607-3p	YIPF6	Yip1 domain family, member 6	>-0.02	http://www.targetscan.org/cgi-bin/targetscan/vert_61/view_gene.cgi?taxid=9606&rs=NM_001195214&members=miR-3607-3p&showcnc=1&shownc=1&showncf=1
hsa-miR-3607-3p	MIMAT0017985	hsa-miR-3607-3p	WIPF3	WAS/WASL interacting protein family, member 3	>-0.02	http://www.targetscan.org/cgi-bin/targetscan/vert_61/view_gene.cgi?taxid=9606&rs=NM_001080529&members=miR-3607-3p&showcnc=1&shownc=1&showncf=1
hsa-miR-3607-3p	MIMAT0017985	hsa-miR-3607-3p	RAP2B	RAP2B, member of RAS oncogene family	-0.02	http://www.targetscan.org/cgi-bin/targetscan/vert_61/view_gene.cgi?taxid=9606&rs=NM_002886&members=miR-3607-3p&showcnc=1&shownc=1&showncf=1
hsa-miR-3607-3p	MIMAT0017985	hsa-miR-3607-3p	PTPN20B	protein tyrosine phosphatase, non-receptor type 20B	-0.02	http://www.targetscan.org/cgi-bin/targetscan/vert_61/view_gene.cgi?taxid=9606&rs=NM_001042357&members=miR-3607-3p&showcnc=1&shownc=1&showncf=1
hsa-miR-3607-3p	MIMAT0017985	hsa-miR-3607-3p	PTPN20A	protein tyrosine phosphatase, non-receptor type 20A	-0.01	http://www.targetscan.org/cgi-bin/targetscan/vert_61/view_gene.cgi?taxid=9606&rs=NM_001042387&members=miR-3607-3p&showcnc=1&shownc=1&showncf=1
hsa-miR-3607-3p	MIMAT0017985	hsa-miR-3607-3p	KIAA0195	KIAA0195	-0.01	http://www.targetscan.org/cgi-bin/targetscan/vert_61/view_gene.cgi?taxid=9606&rs=NM_014738&members=miR-3607-3p&showcnc=1&shownc=1&showncf=1
hsa-miR-3607-3p	MIMAT0017985	hsa-miR-3607-3p	KIAA0240	KIAA0240	>-0.01	http://www.targetscan.org/cgi-bin/targetscan/vert_61/view_gene.cgi?taxid=9606&rs=NM_015349&members=miR-3607-3p&showcnc=1&shownc=1&showncf=1
hsa-miR-3607-3p	MIMAT0017985	hsa-miR-3607-3p	NEO1	neogenin 1	>-0.01	http://www.targetscan.org/cgi-bin/targetscan/vert_61/view_gene.cgi?taxid=9606&rs=NM_001172623&members=miR-3607-3p&showcnc=1&shownc=1&showncf=1
hsa-miR-3607-3p	MIMAT0017985	hsa-miR-3607-3p	POU2F1	POU class 2 homeobox 1	>-0.01	http://www.targetscan.org/cgi-bin/targetscan/vert_61/view_gene.cgi?taxid=9606&rs=NM_001198783&members=miR-3607-3p&showcnc=1&shownc=1&showncf=1
hsa-miR-3607-3p	MIMAT0017985	hsa-miR-3607-3p	KIAA0355	KIAA0355	>-0.01	http://www.targetscan.org/cgi-bin/targetscan/vert_61/view_gene.cgi?taxid=9606&rs=NM_014686&members=miR-3607-3p&showcnc=1&shownc=1&showncf=1
hsa-miR-3607-3p	MIMAT0017985	hsa-miR-3607-3p	FAM155B	family with sequence similarity 155, member B	>-0.01	http://www.targetscan.org/cgi-bin/targetscan/vert_61/view_gene.cgi?taxid=9606&rs=NM_015686&members=miR-3607-3p&showcnc=1&shownc=1&showncf=1
hsa-miR-3607-3p	MIMAT0017985	hsa-miR-3607-3p	COPS2	COP9 constitutive photomorphogenic homolog subunit 2 (Arabidopsis)	>-0.01	http://www.targetscan.org/cgi-bin/targetscan/vert_61/view_gene.cgi?taxid=9606&rs=NM_001143887&members=miR-3607-3p&showcnc=1&shownc=1&showncf=1
hsa-miR-3607-3p	MIMAT0017985	hsa-miR-3607-3p	ZNF706	zinc finger protein 706	>-0.01	http://www.targetscan.org/cgi-bin/targetscan/vert_61/view_gene.cgi?taxid=9606&rs=NM_001042510&members=miR-3607-3p&showcnc=1&shownc=1&showncf=1
hsa-miR-3607-3p	MIMAT0017985	hsa-miR-3607-3p	USP46	ubiquitin specific peptidase 46	>-0.01	http://www.targetscan.org/cgi-bin/targetscan/vert_61/view_gene.cgi?taxid=9606&rs=NM_001134223&members=miR-3607-3p&showcnc=1&shownc=1&showncf=1
hsa-miR-3607-3p	MIMAT0017985	hsa-miR-3607-3p	MDGA1	MAM domain containing glycosylphosphatidylinositol anchor 1	>-0.01	http://www.targetscan.org/cgi-bin/targetscan/vert_61/view_gene.cgi?taxid=9606&rs=NM_153487&members=miR-3607-3p&showcnc=1&shownc=1&showncf=1
hsa-miR-3607-3p	MIMAT0017985	hsa-miR-3607-3p	ANKRD52	ankyrin repeat domain 52	>-0.01	http://www.targetscan.org/cgi-bin/targetscan/vert_61/view_gene.cgi?taxid=9606&rs=NM_173595&members=miR-3607-3p&showcnc=1&shownc=1&showncf=1
